# Supplementary material for: A most wanted list of conserved microbial protein families with no known domains
Source: PLoS One. 2018 Oct 17;13(10):e0205749. doi: 10.1371/journal.pone.0205749 (PMC6192648; doi:10.1371/journal.pone.0205749)
Supplement: S1 Table — (XLSX) [file pone.0205749.s007.xlsx]

## Sheet: TableS1.csv
SFams ID	Family Size	Mean Protein Length	Taxonomic LCA	Taxonomic Span	TO Prevalence	HMP Prevalence
4560	203	93.2	Proteobacteria	6	NA	NA
5472	161	329.2	Proteobacteria	6	1	0.0143678
5980	145	292.6	Eukaryota	7	NA	NA
6199	139	263.3	Bacillales	5	0	0.329023
7431	112	61.1	Bacillales	5	0	0.00287356
7718	107	113.1	Firmicutes	6	0	0.435345
8397	98	186.7	Proteobacteria	6	0.103896	0.25
8417	98	305	Proteobacteria	6	0.288961	0.0244253
8424	98	118.4	Firmicutes	6	NA	NA
8491	97	201.7	Firmicutes	6	0	0.00574713
8606	96	347.1	Firmicutes	6	0.0519481	0.0100575
8752	94	129.9	Chroococcales	5	NA	NA
9546	85	107	Vibrionales	5	0.152597	0
9577	85	108.9	Proteobacteria	6	0.198052	0.189655
9871	83	288.8	Firmicutes	6	0	0.54454
10470	79	143.9	Bacteria	7	0.435065	0.778736
10590	78	225.7	Bacillales	5	0.0292208	0.0517241
10616	77	73.1	Firmicutes	6	0	0.747126
10682	77	244.3	Proteobacteria	6	0.0519481	0.412356
10686	77	178	Enterobacteriales	5	0.038961	0.0445402
10787	76	113.8	Bacillales	5	0	0.110632
10877	76	255.8	Vibrionales	5	0.922078	0
11051	75	185	Proteobacteria	6	0.337662	0.00287356
11215	73	150.2	Firmicutes	6	NA	NA
11443	72	102.4	Burkholderiales	5	0.162338	0
11666	70	239.5	Enterobacteriales	5	0	0.0818966
11681	70	269.2	Actinobacteria	6	0.798701	0.00862069
11765	69	142.6	Firmicutes	6	0	0.163793
11815	69	215.3	Proteobacteria	6	0.00974026	0.00143678
11947	68	240.2	Firmicutes	6	0	0.267241
11989	68	255	Bacillales	5	0	0.045977
12110	67	458	Vibrionales	5	0.766234	0.00143678
12141	67	202.8	Firmicutes	6	0.0292208	0
12161	67	101.9	Bacillales	5	NA	NA
12327	66	350.3	Clostridiales	5	0	0.00431035
12413	65	375.1	Actinobacteria	6	0.980519	0.00718391
12535	65	120.8	Bacillales	5	0	0.00431035
12626	64	85.7	Burkholderiales	5	0.00974026	0
12810	63	370.3	Proteobacteria	6	0.24026	0.012931
12822	63	414.4	Bacillales	5	0	0.00143678
12972	62	231.8	Proteobacteria	6	0.0584416	0.640805
12994	62	355.2	Bacillales	5	0	0.00287356
13049	62	209.9	Bacillales	5	NA	NA
13155	61	326.9	Firmicutes	6	0.103896	0.66092
13234	61	73.9	Bacillales	5	NA	NA
13316	60	140	Bacillales	5	NA	NA
13338	60	115.4	Rhizobiales	5	0.204545	0
13364	60	141.5	Burkholderiales	5	0.172078	0.00143678
13436	60	65.2	Proteobacteria	6	0.0422078	0.0675287
13450	60	205.7	Proteobacteria	6	0.993506	0.00718391
13635	59	346.4	Enterobacteriales	5	0.168831	0.0818966
13666	59	70.7	Firmicutes	6	NA	NA
13716	59	90.5	Bacillales	5	NA	NA
13728	58	213.3	Firmicutes	6	0.996753	0.939655
13797	58	373.5	Proteobacteria	6	0.198052	0.492816
13831	58	170.2	Actinobacteria	6	0.0844156	0
13986	57	267.7	Burkholderiales	5	0.012987	0.00143678
14297	56	544.9	Enterobacteriales	5	0.159091	0.12069
14491	55	252.7	Proteobacteria	6	0.883117	0.00718391
14606	54	161.8	Firmicutes	6	0	0.00143678
14719	54	129.6	Bacillales	5	NA	NA
14741	54	315.2	Bacteria	7	0.724026	0.0244253
14747	54	233.8	Firmicutes	6	0	0.479885
14834	53	103.3	Bacillales	5	NA	NA
14866	53	129.5	Firmicutes	6	0	0.71408
14914	53	84.6	Proteobacteria	6	0	0.0272989
14984	52	78.7	Rhizobiales	5	0.347403	0
15137	52	109.6	Enterobacteriales	5	0.0649351	0.0545977
15164	52	163.6	Burkholderiales	5	0.012987	0
15168	52	162	Bacillales	5	NA	NA
15183	52	84.2	Burkholderiales	5	NA	NA
15190	52	143.6	Bacillales	5	0	0.00143678
15361	51	190.7	Burkholderiales	5	0.012987	0
15372	51	123.2	Bacillales	5	0.025974	0.00431035
15396	51	184.6	Firmicutes	6	0	0.640805
15620	50	115.5	Firmicutes	6	0	0.0172414
15680	50	188.2	Bacillales	5	NA	NA
15710	50	205.4	Pseudomonadales	5	0.363636	0.0272989
15762	49	198.6	Proteobacteria	6	0.954545	0.00143678
15811	49	73.1	Proteobacteria	6	0.584416	0.00862069
15960	49	259.5	Proteobacteria	6	0.0551948	0.0545977
15978	49	246.3	Lactobacillales	5	0	0.231322
16050	49	85.8	Burkholderiales	5	0.707792	0.00574713
16112	48	156.7	Firmicutes	6	0.159091	0.218391
16199	48	273.4	Proteobacteria	6	0.0422078	0.00143678
16221	48	103.9	Enterobacteriales	5	0.0454545	0.012931
16222	48	176.2	Burkholderiales	5	0.0649351	0.00143678
16445	47	239.2	Bacillales	5	0	0.0962644
16574	47	216.8	Proteobacteria	6	0.766234	0
16589	47	240.6	Actinobacteria	6	0.100649	0.00431035
16608	47	179.1	Enterobacteriales	5	0.0584416	0.162356
16619	47	287	Rhizobiales	5	0.801948	0.0229885
16682	46	188.7	Vibrionales	5	0.675325	0
16950	46	187.3	Vibrionales	5	0.178571	0
16978	45	219.5	Actinomycetales	5	0.0844156	0.58046
17125	45	292.9	Proteobacteria	6	0.198052	0.00143678
17153	45	121.9	Proteobacteria	6	0.237013	0
17222	45	211	Burkholderiales	5	0.892857	0.0431034
17270	45	250.4	Firmicutes	6	NA	NA
17321	44	894.3	Bacteria	7	0.782468	0.152299
17346	44	144.2	Actinobacteria	6	0.0422078	0
17359	44	165.6	Burkholderiales	5	0	0.00143678
17366	44	159.2	Bacillales	5	0.0519481	0.119253
17385	44	87	Chroococcales	5	NA	NA
17463	44	292.8	Proteobacteria	6	0.62987	0.012931
17492	44	127.5	Burkholderiales	5	0.00974026	0.00143678
17574	44	82.3	Vibrionales	5	0.126623	0
17576	44	145.6	Chroococcales	5	0.938312	0
17601	44	275.9	Proteobacteria	6	0.383117	0.570402
17617	44	556.8	Firmicutes	6	0	0.439655
17643	44	129.2	Firmicutes	6	NA	NA
17716	43	141.8	Actinobacteria	6	0.100649	0
17760	43	202.4	Burkholderiales	5	0.00974026	0.00143678
17797	43	210.7	Firmicutes	6	0.0357143	0.704023
17907	43	164.5	Vibrionales	5	0.142857	0
17925	43	240.5	Firmicutes	6	0.0162338	0.336207
17944	43	78.4	Enterobacteriales	5	0	0.00287356
17966	43	152.2	Campylobacterales	5	0	0.466954
17980	43	241.3	Burkholderiales	5	0.0551948	0.21408
17981	43	572.9	Pseudomonadales	5	0.925325	0.012931
18052	42	257.1	Burkholderiales	5	0.0616883	0.00143678
18179	42	142.9	Rhizobiales	5	0.175325	0
18264	42	116	Pseudomonadales	5	0.178571	0
18278	42	197.3	Bacteria	7	0.0584416	0.00143678
18392	42	264.4	Alteromonadales	5	0.983766	0.00143678
18400	42	123	Proteobacteria	6	0.233766	0
18438	41	344.3	Firmicutes	6	0.0746753	0
18439	41	73	Rhizobiales	5	0.133117	0
18447	41	164	Enterobacteriales	5	0.0519481	0.00287356
18565	41	196	Bacillales	5	NA	NA
18600	41	162.5	Bacillales	5	0.113636	0.192529
18606	41	430.5	Burkholderiales	5	0.012987	0
18627	41	190.8	Firmicutes	6	0.025974	0.642241
18663	41	217.4	Bacteria	7	0.0779221	0
18703	41	182	Firmicutes	6	NA	NA
18735	41	355.6	Burkholderiales	5	0.0227273	0.00287356
18752	41	111.8	Actinobacteria	6	0.227273	0.00143678
18759	41	200.6	Proteobacteria	6	0.0162338	0.00143678
18852	40	101.3	Enterobacteriales	5	0.0454545	0.00287356
18909	40	210.4	Proteobacteria	6	0.925325	0.00143678
18913	40	187.7	Lactobacillales	5	0.0454545	0.647989
18942	40	213	Enterobacteriales	5	0.0324675	0
19015	40	345.2	Chroococcales	5	0.957792	0.00143678
19037	40	187.1	Firmicutes	6	0.0551948	0
19075	40	156	Alteromonadales	5	0.175325	0
19230	39	184.6	Enterobacteriales	5	0.0357143	0.00287356
19394	39	214.4	Alteromonadales	5	0.954545	0.00431035
19401	39	134.2	Bacillales	5	0	0.192529
19411	39	235.2	Proteobacteria	6	0.464286	0.00287356
19451	39	195.4	Bacillales	5	NA	NA
19470	39	376.2	Proteobacteria	6	NA	NA
19477	39	306.3	Burkholderiales	5	0.012987	0.00143678
19498	39	491.7	Bacteroidales	5	0.938312	0.711207
19502	39	176.9	Chroococcales	5	0.935065	0
19634	39	139.3	Enterobacteriales	5	NA	NA
19713	38	238.9	Proteobacteria	6	NA	NA
19736	38	184.7	Proteobacteria	6	0.425325	0.0114943
19776	38	304	Firmicutes	6	0	0.00287356
19788	38	178.8	Proteobacteria	6	0	0.693966
19810	38	73.5	Actinobacteria	6	NA	NA
19811	38	155.3	Bacteroidetes	6	0.928571	0.00862069
19916	38	121.7	Enterobacteriales	5	0	0.0272989
19924	38	119.7	Vibrionales	5	0.100649	0
19953	38	233.7	Planctomycetes	6	NA	NA
20131	37	52.6	Lactobacillales	5	0	0.308908
20228	37	399.9	Enterobacteriales	5	0.0324675	0.00287356
20443	37	445.7	Burkholderiales	5	NA	NA
20483	37	223.4	Vibrionales	5	0.12987	0
20547	36	80.9	Firmicutes	6	0	0.244253
20566	36	72.7	Burkholderiales	5	0.74026	0.0114943
20656	36	201.8	Enterobacteriales	5	0.597403	0
20681	36	133.3	Burkholderiales	5	NA	NA
20776	36	89.1	Burkholderiales	5	NA	NA
20815	36	261.1	Burkholderiales	5	NA	NA
20879	36	101.8	Lactobacillales	5	0.00649351	0.66954
20889	36	135.2	Pseudomonadales	5	0.282468	0.00862069
20935	36	109.3	Lactobacillales	5	0	0.33908
20982	36	136	Burkholderiales	5	0.0324675	0.00143678
20984	36	160.2	Rhizobiales	5	0.266234	0.00143678
20998	36	89	Firmicutes	6	0.0422078	0.485632
21087	35	240.3	Rhizobiales	5	0.107143	0
21116	35	177.8	Enterobacteriales	5	0	0.00287356
21153	35	224.5	Actinobacteria	6	0.0519481	0.00287356
21160	35	309	Burkholderiales	5	0.853896	0.0818966
21221	35	410.1	Alteromonadales	5	0.951299	0
21243	35	336.5	Bacteroidetes	6	0.86039	0.686782
21280	35	288.1	Actinobacteria	6	NA	NA
21282	35	160.9	Flavobacteriales	5	0.62987	0.488506
21329	35	214.1	Sphingobacteriales	5	0.607143	0.123563
21340	35	116.1	Bacteria	7	0.0974026	0.531609
21343	35	164.2	Bacillales	5	0	0.183908
21347	35	100.5	Burkholderiales	5	NA	NA
21398	35	266.5	Burkholderiales	5	0	0.00287356
21416	35	215.4	Enterobacteriales	5	0.00974026	0.00143678
21420	35	146.4	Actinobacteria	6	0	0.360632
21453	35	161.8	Burkholderiales	5	NA	NA
21461	35	73.6	Proteobacteria	6	0.863636	0
21509	35	214.8	Actinobacteria	6	0.0519481	0.145115
21635	34	146.4	Bacteria	7	0.0909091	0.573276
21650	34	80.4	Bacteria	7	0.772727	0.156609
21700	34	266.1	Enterobacteriales	5	0	0.104885
21714	34	128.8	Proteobacteria	6	NA	NA
21728	34	235.6	Firmicutes	6	NA	NA
21798	34	90.5	Firmicutes	6	0	0.49569
21830	34	214	Proteobacteria	6	0.451299	0
21855	34	112.9	Proteobacteria	6	0	0.331897
21931	34	103.7	Enterobacteriales	5	0.152597	0.265805
21954	34	398.8	Firmicutes	6	NA	NA
21991	34	225.7	Firmicutes	6	0	0.451149
22004	34	92.4	Alteromonadales	5	0.863636	0
22020	34	86.8	Cyanobacteria	6	NA	NA
22042	34	83	Chroococcales	5	0.831169	0
22129	34	422.2	Proteobacteria	6	0.808442	0.0474138
22145	33	83.7	Burkholderiales	5	0.0162338	0
22176	33	216.6	Enterobacteriales	5	NA	NA
22259	33	551.1	Enterobacteriales	5	0.0162338	0.00431035
22406	33	99.3	Proteobacteria	6	0.584416	0.00143678
22517	33	103	Firmicutes	6	0.0811688	0.498563
22687	33	82.8	Vibrionales	5	0.0941558	0
22727	33	96.2	Enterobacteriales	5	0.425325	0.0431034
22738	33	73.6	Clostridiales	5	0	0.502874
22775	32	127.4	Enterobacteriales	5	0.0292208	0.00287356
22790	32	90.8	Proteobacteria	6	NA	NA
22884	32	212.1	Proteobacteria	6	0.00649351	0
22931	32	93.8	Lactobacillales	5	0	0.613506
22954	32	94.3	Firmicutes	6	0	0.433908
22999	32	117.9	Burkholderiales	5	0.623377	0.0100575
23021	32	536.6	Proteobacteria	6	0	0.581897
23089	32	186.7	Firmicutes	6	0.0324675	0.0890805
23109	32	272.3	Bacillales	5	NA	NA
23112	32	125.8	Pseudomonadales	5	0.801948	0.0114943
23119	32	82.5	Enterobacteriales	5	NA	NA
23207	32	350.8	Bacteroidetes	6	1	0.0143678
23217	32	256.3	Rhizobiales	5	0.246753	0
23226	32	163.9	Firmicutes	6	0.123377	0.00143678
23237	32	708.1	Enterobacteriales	5	0.0162338	0.00143678
23238	32	294.1	Burkholderiales	5	0.0324675	0
23268	32	120.7	Actinobacteria	6	0.243506	0.0876437
23336	32	514	Proteobacteria	6	0.633117	0.274425
23387	31	84.8	Burkholderiales	5	0.63961	0.00574713
23392	31	196	Enterobacteriales	5	0.00974026	0.00718391
23417	31	274.4	Bacteria	7	0.503247	0.00143678
23445	31	187	Enterobacteriales	5	0	0.0172414
23451	31	344	Lactobacillales	5	0	0.612069
23458	31	63.1	Enterobacteriales	5	0.194805	0
23477	31	455	Proteobacteria	6	0.0292208	0
23481	31	427.9	Pseudomonadales	5	0.743506	0.033046
23582	31	295.4	Rhizobiales	5	0.305195	0
23608	31	92.5	Actinobacteria	6	NA	NA
23622	31	164.8	Firmicutes	6	0.0227273	0.0775862
23644	31	153.2	Proteobacteria	6	0.0681818	0.00287356
23653	31	119.7	Neisseriales	5	0.441558	0.537356
23705	31	155.2	Firmicutes	6	0	0.104885
23722	31	108.6	Alteromonadales	5	0.724026	0
23800	31	96.5	Pseudomonadales	5	0.37987	0.0100575
23805	31	214.4	Vibrionales	5	0.396104	0.00431035
23865	31	260	Neisseriales	5	0.00974026	0.431034
23870	31	114.1	Pseudomonadales	5	0.766234	0.00143678
23895	31	428.8	Bacteria	7	0.0714286	0.520115
23900	31	118.6	Flavobacteriales	5	0.983766	0.489943
23976	31	248.1	Burkholderiales	5	0.902597	0.045977
24000	31	463.5	Clostridiales	5	0	0.0301724
24016	31	129.3	Enterobacteriales	5	0	0.00143678
24144	30	171.7	Rhodobacterales	5	0.821429	0.00143678
24155	30	162.8	Bacteria	7	0.487013	0
24190	30	85.9	Alteromonadales	5	NA	NA
24205	30	119.7	Chroococcales	5	NA	NA
24321	30	201.4	Enterobacteriales	5	NA	NA
24328	30	278.4	Bacteria	7	0	0.00143678
24373	30	105.7	Proteobacteria	6	0.529221	0.00287356
24394	30	458.9	Actinobacteria	6	NA	NA
24475	30	117.3	Chroococcales	5	0.795455	0
24487	30	193.1	Proteobacteria	6	0.0324675	0
24502	30	65.8	Prochlorales	5	0.925325	0
24645	30	113.5	Alteromonadales	5	0.0519481	0
24657	30	267.6	Burkholderiales	5	0.931818	0.0416667
24671	30	169.3	Firmicutes	6	0	0.420977
24679	30	344.5	Firmicutes	6	0	0.642241
24708	30	79.3	Enterobacteriales	5	0.24026	0.00718391
24722	30	112.8	Firmicutes	6	0	0.54454
24727	30	78.8	Actinobacteria	6	0.0357143	0.524425
24768	29	172.4	Chroococcales	5	NA	NA
24791	29	487	Proteobacteria	6	0.448052	0.00862069
24795	29	241.9	Burkholderiales	5	0.918831	0.0287356
24804	29	197.7	Firmicutes	6	0	0.268678
24959	29	183.7	Chroococcales	5	0.724026	0
25001	29	199.8	Proteobacteria	6	0.545455	0.00287356
25011	29	503	Actinobacteria	6	0.808442	0.00143678
25111	29	336.5	Bifidobacteriales	5	0	0.484195
25115	29	228	Rhizobiales	5	0.581169	0
25137	29	65.9	Bacteria	7	0.126623	0
25144	29	82.1	Campylobacterales	5	0	0.446839
25156	29	866.3	Xanthomonadales	5	NA	NA
25174	29	728.2	Actinobacteria	6	0	0.198276
25185	29	417.7	Bacteroidetes	6	1	0.116379
25198	29	145.5	Firmicutes	6	0	0.178161
25227	29	391.4	Firmicutes	6	NA	NA
25231	29	320.9	Proteobacteria	6	0.113636	0
25236	29	454.2	Rhizobiales	5	0.0162338	0
25240	29	155.9	Bacillales	5	0	0.408046
25324	29	104	Enterobacteriales	5	NA	NA
25344	29	129.8	Enterobacteriales	5	NA	NA
25366	29	367.7	Bacteria	7	0.243506	0.00143678
25387	29	95.9	Proteobacteria	6	0.146104	0.0114943
25413	29	188.3	Proteobacteria	6	NA	NA
25420	29	211.2	Firmicutes	6	0	0.00143678
25433	29	137.7	Firmicutes	6	0	0.485632
25466	28	131.9	Rhizobiales	5	0.698052	0
25527	28	113.6	Bacillales	5	NA	NA
25534	28	145.3	Flavobacteriales	5	0.788961	0.443966
25579	28	253.5	Chroococcales	5	0.805195	0
25655	28	153	Actinobacteria	6	0.0422078	0
25823	28	129.9	Burkholderiales	5	0.827922	0.0258621
25844	28	194	Enterobacteriales	5	NA	NA
25897	28	339.5	Proteobacteria	6	NA	NA
25913	28	256.7	Bacteroidetes	6	0	0.70977
25981	28	90.2	Proteobacteria	6	0.0292208	0
26084	28	151.4	Alteromonadales	5	0.987013	0
26099	28	147.5	Enterobacteriales	5	NA	NA
26128	28	178.3	Enterobacteriales	5	0.0162338	0.0114943
26190	28	84.7	Firmicutes	6	1	0.886494
26258	27	442.7	Actinobacteria	6	0.561688	0.00431035
26314	27	149.1	Lactobacillales	5	0	0.133621
26343	27	199	Bacillales	5	0	0.150862
26357	27	69.7	Clostridiales	5	0	0.188218
26438	27	175.5	Campylobacterales	5	0	0.449713
26449	27	237.6	Enterobacteriales	5	0	0.244253
26486	27	410.9	Firmicutes	6	0	0.557471
26510	27	131.7	Chroococcales	5	0.587662	0
26517	27	1108.9	Proteobacteria	6	0.931818	0.00287356
26526	27	92.7	Desulfovibrionales	5	0	0.0114943
26628	27	117.3	Clostridiales	5	0	0.198276
26649	27	395.9	Bacillales	5	0	0.0244253
26679	27	671.8	Burkholderiales	5	0.155844	0.0100575
26749	27	132.7	Proteobacteria	6	0.327922	0
26759	27	151.4	Proteobacteria	6	0.038961	0.270115
26762	27	150.6	Proteobacteria	6	0	0.244253
26770	27	147.2	Enterobacteriales	5	0	0.00431035
26793	27	84.7	Prochlorales	5	0.957792	0
26795	27	141.5	Pseudomonadales	5	0.532468	0.00287356
26797	27	413.4	Proteobacteria	6	0	0.454023
26807	27	174	Flavobacteriales	5	0.545455	0.468391
26831	27	216.7	Pseudomonadales	5	0.876623	0.00718391
26848	27	83.6	Firmicutes	6	0.175325	0.229885
26858	27	221.1	Bacteria	7	0.0974026	0
26879	27	222.3	Archaea	7	NA	NA
26906	27	475.9	Proteobacteria	6	0	0.656609
26928	27	62.1	Pasteurellales	5	0	0.193966
26932	27	113.9	Enterobacteriales	5	0.168831	0.045977
27015	27	140.1	Firmicutes	6	0	0.711207
27044	27	406.7	Vibrionales	5	0.782468	0
27154	26	507	Spirochaetes	6	0.0227273	0.265805
27159	26	170.3	Burkholderiales	5	0.0844156	0.00143678
27191	26	196.1	Firmicutes	6	0	0.650862
27203	26	115	Chroococcales	5	0.0324675	0.00143678
27209	26	150.4	Archaea	7	0	0.066092
27210	26	191.3	Bacillales	5	0	0.0316092
27266	26	136.3	Pseudomonadales	5	0.62013	0.00862069
27312	26	92.2	Bacteroidetes	6	0	0.403736
27433	26	167.3	Enterobacteriales	5	0	0.012931
27437	26	118.8	Alteromonadales	5	0.185065	0
27476	26	117.7	Chroococcales	5	0	0.00143678
27540	26	240.3	Rhodobacterales	5	0.551948	0
27546	26	172.7	Clostridiales	5	0	0.00431035
27559	26	139.5	Proteobacteria	6	NA	NA
27580	26	510.7	Planctomycetes	6	0.0584416	0.102011
27593	26	297.5	Firmicutes	6	0	0.178161
27629	26	197.5	Thermoanaerobacterales	5	NA	NA
27748	26	236.8	Burkholderiales	5	NA	NA
27821	26	284.3	Enterobacteriales	5	NA	NA
27860	26	141.3	Rhizobiales	5	0.405844	0
27904	26	164.2	Clostridiales	5	0	0.0775862
27957	25	431.9	Chroococcales	5	NA	NA
27960	25	179.6	Burkholderiales	5	0.0194805	0.00718391
27982	25	259.4	Nostocales	5	NA	NA
28038	25	169.1	Enterobacteriales	5	0.025974	0
28045	25	836.6	Proteobacteria	6	0.295455	0.0517241
28154	25	288.9	Xanthomonadales	5	0	0.316092
28165	25	255	Proteobacteria	6	0.155844	0.551724
28175	25	240.4	Neisseriales	5	0	0.541667
28181	25	280.3	Firmicutes	6	0.457792	0.181034
28250	25	232.4	Proteobacteria	6	0.844156	0.00431035
28285	25	101.9	Bacteria	7	0	0.0158046
28313	25	184.9	Actinobacteria	6	NA	NA
28344	25	206	Alteromonadales	5	0.133117	0
28350	25	101.8	Proteobacteria	6	0.0487013	0
28357	25	135.1	Actinobacteria	6	0.496753	0
28394	25	289.8	Clostridiales	5	0	0.37069
28513	25	115.3	Chroococcales	5	0	0.00143678
28535	25	302.6	Proteobacteria	6	0.36039	0.0991379
28564	25	141.7	Firmicutes	6	0	0.173851
28633	25	421	Proteobacteria	6	NA	NA
28640	25	197.3	Bacteroidetes	6	0.983766	0.510057
28658	25	159.9	Vibrionales	5	NA	NA
28673	25	139.7	Alteromonadales	5	0.0584416	0
28675	25	104.8	Chroococcales	5	NA	NA
28685	25	132.9	Proteobacteria	6	0.113636	0.545977
28705	25	455.6	Proteobacteria	6	0.691558	0.122126
28719	25	181.1	Firmicutes	6	0	0.182471
28759	25	110.6	Bacteroidetes	6	0	0.366379
28788	25	103.2	Chroococcales	5	0.0519481	0.00143678
28799	25	110.8	Alteromonadales	5	0.87013	0
28862	25	1188.4	Burkholderiales	5	NA	NA
28871	25	97.6	Proteobacteria	6	0	0.106322
28895	25	152	Actinomycetales	5	NA	NA
28953	25	88.8	Vibrionales	5	0.149351	0
28978	24	125.9	Chroococcales	5	NA	NA
28990	24	416	Bacteria	7	0.36039	0.0818966
29052	24	191.6	Firmicutes	6	NA	NA
29110	24	162.8	Rhodobacterales	5	0.905844	0
29122	24	73	Bacillales	5	0	0.00287356
29169	24	61.8	Firmicutes	6	0	0.442529
29215	24	115.5	Firmicutes	6	0	0.280172
29348	24	56.7	Proteobacteria	6	0.769481	0.00287356
29384	24	231	Enterobacteriales	5	0	0.0359195
29399	24	74.1	Proteobacteria	6	NA	NA
29402	24	120.5	Neisseriales	5	0.00974026	0.538793
29499	24	133	Flavobacteriales	5	0.587662	0
29528	24	295.6	Cyanobacteria	6	NA	NA
29557	24	156.6	Proteobacteria	6	0.0714286	0.00287356
29568	24	178.5	Pseudomonadales	5	0.11039	0.0114943
29588	24	133.2	Chroococcales	5	0	0.00143678
29644	24	92.3	Pseudomonadales	5	0.295455	0.00574713
29646	24	187.8	Pseudomonadales	5	0.0454545	0.00143678
29679	24	124	Chroococcales	5	NA	NA
29685	24	97.8	Chroococcales	5	NA	NA
29782	24	219.2	Bacillales	5	0	0.0201149
29795	24	256	Bacillales	5	NA	NA
29841	24	138	Bacillales	5	NA	NA
29848	24	396.6	Vibrionales	5	NA	NA
29893	24	107.2	Firmicutes	6	0.993506	0.836207
29900	24	711.7	Cyanobacteria	6	0	0.00143678
29958	24	300.2	Proteobacteria	6	0.0454545	0.00143678
29963	24	89.5	Prochlorales	5	0.944805	0
29969	24	122.6	Bacteria	7	0.357143	0
29977	24	125.4	Neisseriales	5	0	0.484195
29984	24	132.8	Actinobacteria	6	NA	NA
30017	24	98.3	Actinobacteria	6	0.103896	0
30018	24	76.5	Prochlorales	5	0.902597	0
30022	24	451.6	Burkholderiales	5	NA	NA
30034	24	150.5	Firmicutes	6	0	0.221264
30122	24	99.5	Pseudomonadales	5	0.207792	0.00287356
30143	24	90	Proteobacteria	6	0.931818	0.107759
30158	23	93.1	Proteobacteria	6	NA	NA
30161	23	78.1	Firmicutes	6	0	0.441092
30170	23	403.8	Proteobacteria	6	0.464286	0.353448
30209	23	178.9	Prochlorales	5	0.938312	0
30228	23	196.3	Rhizobiales	5	0.422078	0.00143678
30252	23	114.4	Bacillales	5	0	0.00431035
30262	23	290.2	Proteobacteria	6	0.136364	0.00143678
30278	23	98	Vibrionales	5	0.146104	0
30298	23	149.5	Rhizobiales	5	0.675325	0
30307	23	217.9	Enterobacteriales	5	NA	NA
30366	23	615.3	Bacteria	7	0.0357143	0
30374	23	193.8	Pseudomonadales	5	0.831169	0.00574713
30390	23	181.4	Alteromonadales	5	0.668831	0
30415	23	126.8	Proteobacteria	6	0.269481	0.00143678
30477	23	136.3	Proteobacteria	6	NA	NA
30494	23	228.2	Proteobacteria	6	0.025974	0.00287356
30637	23	395.7	Bacteroidetes	6	0.0551948	0.0890805
30689	23	153.7	Enterobacteriales	5	0.103896	0.0158046
30705	23	107.9	Prochlorales	5	0.948052	0
30712	23	248.2	Proteobacteria	6	NA	NA
30722	23	123.9	Prochlorales	5	0.957792	0
30726	23	225.4	Firmicutes	6	0	0.234195
30735	23	114.7	Clostridiales	5	NA	NA
30760	23	398.1	Proteobacteria	6	0.454545	0
30828	23	129	Prochlorales	5	0.915584	0
30865	23	289.7	Bacteria	7	0.038961	0.00574713
30876	23	181	Spirochaetes	6	0.415584	0
30889	23	114.6	Bacteria	7	0.0941558	0.00143678
30890	23	680.6	Bacteria	7	0.545455	0.00574713
30907	23	109.8	Chroococcales	5	NA	NA
30912	23	107.7	Proteobacteria	6	0	0.347701
30951	23	156	Campylobacterales	5	0	0.485632
30995	23	75.6	Prochlorales	5	0.944805	0
31008	23	136.4	Prochlorales	5	0.944805	0
31011	23	167	Flavobacteriales	5	0.470779	0
31023	23	130.4	Burkholderiales	5	0.581169	0.0186782
31098	23	85.3	Prochlorales	5	0.954545	0
31122	23	140.1	Chroococcales	5	NA	NA
31129	23	128.3	Chroococcales	5	0	0.00143678
31199	23	572.9	Proteobacteria	6	0.980519	0.0229885
31220	23	141.6	Rhizobiales	5	0.233766	0.079023
31234	23	65	Clostridiales	5	0	0.195402
31305	23	191.4	Prochlorales	5	0.964286	0
31309	23	134.3	Prochlorales	5	0.912338	0
31337	23	69.9	Firmicutes	6	0.996753	0.820402
31449	23	50.3	Prochlorales	5	0.918831	0
31494	22	170.3	Clostridiales	5	0	0.126437
31496	22	112	Bacteroidetes	6	0.928571	0.176724
31552	22	83.8	Firmicutes	6	0	0.00143678
31621	22	313.6	Proteobacteria	6	1	0.00574713
31664	22	226.9	Prochlorales	5	0.964286	0
31695	22	152.8	Burkholderiales	5	0	0.00143678
31717	22	508.8	Chroococcales	5	0.974026	0
31732	22	169.3	Bacteria	7	0.116883	0
31735	22	733.2	Proteobacteria	6	0.353896	0.162356
31822	22	83.3	Flavobacteriales	5	0.551948	0.448276
31885	22	299.8	Chroococcales	5	NA	NA
31906	22	186.4	Firmicutes	6	NA	NA
31909	22	83.5	Prochlorales	5	0.909091	0
31920	22	145.1	Chroococcales	5	NA	NA
32105	22	650.6	Alteromonadales	5	0.970779	0
32126	22	240.9	Bacteria	7	0.438312	0
32130	22	151.3	Prochlorales	5	0.951299	0
32141	22	129.1	Prochlorales	5	0.944805	0
32145	22	69	Chroococcales	5	NA	NA
32157	22	339.3	Rhizobiales	5	0.353896	0.00287356
32219	22	168.5	Vibrionales	5	0.0227273	0
32247	22	390.5	Legionellales	5	0.519481	0
32248	22	308.7	Proteobacteria	6	0.211039	0.318966
32249	22	110.5	Prochlorales	5	0.954545	0
32275	22	84	Burkholderiales	5	NA	NA
32299	22	296.8	Firmicutes	6	0	0.0704023
32320	22	161.7	Pseudomonadales	5	0.207792	0.00287356
32359	22	209.5	Proteobacteria	6	0.714286	0.00574713
32361	22	215.5	Rhodobacterales	5	0.746753	0.00431035
32363	22	387.2	Bacteria	7	0	0.00143678
32366	22	136	Burkholderiales	5	0.775974	0.00143678
32422	22	363.2	Bacillales	5	NA	NA
32432	22	186.9	Proteobacteria	6	NA	NA
32444	22	544.4	Chroococcales	5	0.0194805	0.00287356
32445	22	158	Proteobacteria	6	0.519481	0.20977
32451	22	260	Vibrionales	5	0.321429	0
32463	22	150.6	Firmicutes	6	0.0227273	0.28592
32477	22	166.7	Vibrionales	5	0.0584416	0
32524	22	270.4	Bacteria	7	0.146104	0.186782
32550	22	179.5	Pseudomonadales	5	0.308442	0.00718391
32635	22	127.8	Alteromonadales	5	0.0194805	0
32636	22	224.5	Actinobacteria	6	0	0.54023
32670	22	295	Proteobacteria	6	0	0.0186782
32673	22	255.7	Rhizobiales	5	0.038961	0
32708	22	82.3	Chroococcales	5	0.915584	0
32744	22	203.5	Prochlorales	5	0.961039	0
32746	22	132.1	Proteobacteria	6	NA	NA
32753	22	125.4	Pseudomonadales	5	0.0487013	0.00431035
32773	22	119.5	Firmicutes	6	0	0.613506
32777	22	415.6	Proteobacteria	6	0.0422078	0.159483
32793	22	170.6	Cyanobacteria	6	NA	NA
32798	22	73.1	Bacteroidetes	6	0	0.673851
32802	22	414	Bacteroidales	5	0	0.33477
32805	22	314.3	Rhizobiales	5	0.681818	0.00718391
32810	22	96.1	Chroococcales	5	NA	NA
32827	22	504.8	Firmicutes	6	0.0422078	0.103448
32843	22	245.2	Burkholderiales	5	NA	NA
32953	21	251.9	Firmicutes	6	0	0.192529
32967	21	150.4	Chroococcales	5	0	0.00143678
33024	21	227.3	Proteobacteria	6	0.977273	0.231322
33066	21	104.8	Proteobacteria	6	0.405844	0.00287356
33073	21	58.8	Alteromonadales	5	0.175325	0
33103	21	115.1	Alteromonadales	5	0.0162338	0
33104	21	86.3	Rhizobiales	5	0.0324675	0
33107	21	151.9	Burkholderiales	5	NA	NA
33212	21	195.8	Bacteroidetes	6	0	0.29454
33238	21	344.9	Proteobacteria	6	0.0422078	0.0603448
33263	21	254.4	Xanthomonadales	5	0	0.21408
33291	21	289	Legionellales	5	0.230519	0
33307	21	150.9	Clostridiales	5	NA	NA
33345	21	75.9	Flavobacteriales	5	0.827922	0.454023
33372	21	101	Alteromonadales	5	0.0227273	0
33393	21	58	Pseudomonadales	5	0.814935	0.0100575
33517	21	166.7	Rhizobiales	5	0.675325	0
33518	21	222.7	Bacillales	5	NA	NA
33610	21	98.1	Bacteroidetes	6	0	0.33477
33718	21	179.6	Firmicutes	6	0.211039	0.00431035
33751	21	110.2	Bacteroidales	5	0.207792	0.350575
33766	21	326.2	Bacteroidetes	6	0.230519	0.691092
33773	21	71.2	Prochlorales	5	0.931818	0
33811	21	75.9	Prochlorales	5	0.863636	0
33827	21	197.1	Firmicutes	6	NA	NA
33865	21	512	Lactobacillales	5	0	0.227011
33931	21	143.1	Rhodobacterales	5	0.600649	0.00287356
33995	21	139.1	Rhizobiales	5	0.461039	0.00143678
34004	21	136.7	Proteobacteria	6	0.116883	0
34045	21	99.3	Prochlorales	5	0.88961	0
34067	21	189.2	Chroococcales	5	NA	NA
34076	21	96.4	Prochlorales	5	0.925325	0
34086	21	264.7	Chroococcales	5	0	0.00143678
34104	21	89.4	Enterobacteriales	5	NA	NA
34133	21	214.7	Proteobacteria	6	0.827922	0.0258621
34192	21	148.3	Chroococcales	5	NA	NA
34202	21	165	Campylobacterales	5	0	0.468391
34249	21	63.9	Bacillales	5	0	0.156609
34261	21	1154.4	Proteobacteria	6	1	0.0689655
34286	21	113.3	Burkholderiales	5	0.493506	0.00862069
34299	21	292.6	Proteobacteria	6	NA	NA
34343	21	71.3	Firmicutes	6	0	0.183908
34344	21	279	Bacteria	7	0.337662	0.0890805
34361	21	90.3	Prochlorales	5	0.876623	0
34368	21	505.9	Bifidobacteriales	5	0	0.130747
34467	20	142.1	Chroococcales	5	NA	NA
34473	20	246.8	Flavobacteriales	5	0.814935	0.5
34522	20	86.9	Enterobacteriales	5	0	0.0114943
34584	20	110.5	Desulfovibrionales	5	0	0.0114943
34697	20	139.8	Clostridiales	5	0	0.303161
34726	20	108	Burkholderiales	5	0	0.00143678
34744	20	235.8	Bacteria	7	0	0.45977
34793	20	284.6	Firmicutes	6	0.012987	0.239943
34803	20	482	Bacteria	7	0.227273	0
34816	20	103.9	Firmicutes	6	0	0.00143678
34832	20	101.4	Vibrionales	5	0.165584	0
34876	20	195.7	Bacillales	5	NA	NA
34920	20	168.9	Alteromonadales	5	0.0357143	0
35061	20	139.1	Rhizobiales	5	0.853896	0.0114943
35150	20	159.4	Chroococcales	5	NA	NA
35260	20	469.4	Rhizobiales	5	0.0584416	0.00143678
35376	20	90.9	Chroococcales	5	NA	NA
35377	20	80.8	Actinomycetales	5	NA	NA
35395	20	517.6	Bacillales	5	0	0.00431035
35402	20	177.4	Thermoanaerobacterales	5	NA	NA
35423	20	64.4	Prochlorales	5	0.922078	0
35430	20	95.3	Burkholderiales	5	0.321429	0.045977
35442	20	433.4	Desulfuromonadales	5	NA	NA
35458	20	209.2	Prochlorales	5	0.935065	0
35483	20	246.9	Burkholderiales	5	0.038961	0.122126
35500	20	234.7	Actinobacteria	6	NA	NA
35504	20	88.5	Desulfuromonadales	5	NA	NA
35573	20	319.6	Rhizobiales	5	0.194805	0.00287356
35611	20	437.9	Firmicutes	6	0	0.00431035
35621	20	231.6	Alteromonadales	5	0.175325	0
35653	20	162.1	Proteobacteria	6	0.0194805	0.508621
35710	20	85	Bacillales	5	NA	NA
35783	20	68.5	Chroococcales	5	0.925325	0
35796	20	319.9	Enterobacteriales	5	0	0.00287356
35799	20	65.5	Chroococcales	5	NA	NA
35813	20	164.3	Chroococcales	5	0.931818	0
35972	20	141.9	Rhodobacterales	5	0.909091	0
35995	20	245.3	Actinobacteria	6	0.0779221	0
36031	20	96.7	Desulfuromonadales	5	0.0746753	0.00431035
36036	20	83.6	Vibrionales	5	NA	NA
36048	20	57.4	Bacillales	5	NA	NA
36053	20	204.1	Enterobacteriales	5	0	0.00287356
36100	20	52	Cyanobacteria	6	0.925325	0
36116	20	128.7	Chroococcales	5	NA	NA
36121	20	98.8	Proteobacteria	6	0.772727	0.00287356
36135	20	398	Bacteroidetes	6	0	0.352011
36149	20	252.9	Alteromonadales	5	0.357143	0
36193	20	213.8	Proteobacteria	6	0.542208	0.130747
36295	19	60.2	Prochlorales	5	0.88961	0
36313	19	452.3	Proteobacteria	6	0.37013	0.00574713
36315	19	294.5	Chroococcales	5	NA	NA
36340	19	212.5	Flavobacteriales	5	0.704545	0.487069
36345	19	92.8	Firmicutes	6	0	0.409483
36447	19	167.1	Xanthomonadales	5	0.0227273	0.00574713
36565	19	237.8	Pseudomonadales	5	0.853896	0.00862069
36579	19	152.6	Firmicutes	6	0.0487013	0
36620	19	68.5	Chroococcales	5	NA	NA
36669	19	241	Prochlorales	5	0.961039	0
36675	19	266.9	Campylobacterales	5	0	0.012931
36725	19	246.1	Proteobacteria	6	0.337662	0.0416667
36836	19	611.2	Proteobacteria	6	0.863636	0
36880	19	157.5	Bacillales	5	0	0.0416667
36902	19	177.2	Desulfovibrionales	5	0.038961	0.0201149
36924	19	194.9	Pseudomonadales	5	0.525974	0.00287356
36927	19	136.1	Chroococcales	5	0	0.00431035
36928	19	151.6	Vibrionales	5	0.0941558	0
36966	19	70.9	Chroococcales	5	NA	NA
37026	19	428	Xanthomonadales	5	0	0.00287356
37069	19	166.3	Prochlorales	5	0.88961	0
37084	19	214.1	Proteobacteria	6	0.0422078	0.00431035
37170	19	221.4	Bacteroidales	5	0	0.673851
37180	19	207.3	Firmicutes	6	0.00974026	0.318966
37187	19	131.4	Campylobacterales	5	NA	NA
37212	19	81.6	Rhizobiales	5	0.0357143	0.00143678
37225	19	97	Firmicutes	6	NA	NA
37261	19	191.4	Rhizobiales	5	0.292208	0
37305	19	185.1	Burkholderiales	5	0.0162338	0.00143678
37328	19	114.5	Chroococcales	5	NA	NA
37386	19	85.6	Rhizobiales	5	0.0616883	0
37401	19	69.7	Chroococcales	5	0	0.00143678
37422	19	256.6	Proteobacteria	6	0.103896	0
37473	19	197.8	Rhizobiales	5	0.217532	0
37523	19	59.3	Prochlorales	5	0.814935	0
37558	19	202.2	Proteobacteria	6	0.175325	0.00143678
37561	19	76.3	Alteromonadales	5	0.0292208	0
37568	19	112.5	Proteobacteria	6	0.412338	0.00143678
37571	19	109.8	Flavobacteriales	5	0.409091	0.403736
37635	19	293.2	Bacteroidetes	6	0.204545	0.522989
37656	19	100.7	Chroococcales	5	NA	NA
37664	19	200.3	Proteobacteria	6	0.0487013	0.156609
37683	19	66.4	Enterobacteriales	5	NA	NA
37698	19	339.7	Firmicutes	6	0	0.147989
37709	19	180	Enterobacteriales	5	NA	NA
37723	19	204.3	Chroococcales	5	NA	NA
37747	19	343.5	Proteobacteria	6	0.88961	0.00574713
37843	19	66.4	Chroococcales	5	NA	NA
37851	19	96.2	Chroococcales	5	NA	NA
37883	19	129	Chroococcales	5	NA	NA
37895	19	119.8	Proteobacteria	6	0.0324675	0.359195
37902	19	310.4	Vibrionales	5	0.0292208	0
37903	19	83.7	Chroococcales	5	NA	NA
37922	19	329	Cyanobacteria	6	0.691558	0
37924	19	145.5	Firmicutes	6	0	0.537356
37965	19	297.3	Proteobacteria	6	0.0422078	0
38000	19	84.3	Pseudomonadales	5	0.214286	0.00143678
38041	19	83.9	Prochlorales	5	0.925325	0
38076	19	176.8	Proteobacteria	6	0.301948	0
38102	19	96	Actinobacteria	6	NA	NA
38119	19	149.4	Proteobacteria	6	NA	NA
38151	19	114.6	Enterobacteriales	5	0	0.00862069
38158	19	110.1	Chroococcales	5	0.269481	0
38168	19	100.5	Lactobacillales	5	0.038961	0.701149
38171	19	137.5	Bacillales	5	NA	NA
38172	19	102.5	Rhizobiales	5	0.149351	0.00143678
38189	19	165.6	Proteobacteria	6	0.025974	0.00143678
38219	19	61.1	Chroococcales	5	NA	NA
38236	19	470.8	Enterobacteriales	5	0.123377	0
38238	19	117.4	Lactobacillales	5	0	0.49569
38275	19	133.1	Bacteria	7	0	0.333333
38278	19	603.2	Bacteroidetes	6	0.0422078	0.627874
38296	19	354.7	Pseudomonadales	5	0.198052	0.477011
38343	18	301.1	Proteobacteria	6	0.0941558	0.00143678
38428	18	170.6	Rhizobiales	5	0.324675	0
38495	18	158.6	Vibrionales	5	0.116883	0
38511	18	87.6	Flavobacteriales	5	0.415584	0.405172
38525	18	266.6	Archaea	7	NA	NA
38527	18	93.1	Chroococcales	5	NA	NA
38544	18	157.8	Chroococcales	5	NA	NA
38546	18	252.1	Flavobacteriales	5	0.600649	0
38588	18	118.5	Rhodobacterales	5	0.821429	0
38637	18	119.3	Flavobacteriales	5	0.821429	0.481322
38651	18	130.4	Burkholderiales	5	0	0.00143678
38669	18	408.5	Proteobacteria	6	0.607143	0.126437
38673	18	162.7	Proteobacteria	6	0.0487013	0.00287356
38682	18	382.2	Actinobacteria	6	0.207792	0
38725	18	170.6	Flavobacteriales	5	0.470779	0.423851
38773	18	75.4	Alteromonadales	5	0.0292208	0
38783	18	87	Enterobacteriales	5	NA	NA
38803	18	181.4	Alteromonadales	5	0	0.00143678
38828	18	172.1	Bacteria	7	0.655844	0
38961	18	94.2	Enterobacteriales	5	0.386364	0.00862069
39009	18	242.7	Pasteurellales	5	0	0.58046
39028	18	132.6	Enterobacteriales	5	NA	NA
39047	18	252.4	Neisseriales	5	0.0519481	0.208333
39052	18	393.8	Lactobacillales	5	0	0.0977011
39095	18	296.7	Proteobacteria	6	0.350649	0.00143678
39103	18	363.6	Actinobacteria	6	NA	NA
39104	18	106.9	Chroococcales	5	NA	NA
39132	18	68.7	Firmicutes	6	0	0.16092
39159	18	151.6	Bacteroidetes	6	0	0.612069
39168	18	399.2	Bacteroidales	5	0	0.693966
39194	18	269.2	Firmicutes	6	NA	NA
39249	18	190.5	Bacteroidetes	6	0.451299	0
39262	18	84.7	Chroococcales	5	NA	NA
39316	18	164.5	Burkholderiales	5	0.0422078	0
39330	18	190.4	Proteobacteria	6	0.730519	0
39331	18	104.9	Rhodobacterales	5	0.282468	0
39335	18	128.4	Lactobacillales	5	0	0.215517
39381	18	209.4	Firmicutes	6	0	0.0862069
39410	18	89.6	Neisseriales	5	0	0.28592
39416	18	142.6	Chroococcales	5	NA	NA
39457	18	1171.6	Firmicutes	6	0	0.553161
39471	18	197.8	Bacteroidetes	6	0.0162338	0.632184
39492	18	124.8	Prochlorales	5	0.951299	0
39520	18	267.9	Proteobacteria	6	0.668831	0
39525	18	260.8	Burkholderiales	5	0.0162338	0.00287356
39531	18	166.7	Firmicutes	6	0	0.596264
39566	18	338	Burkholderiales	5	0.464286	0.00431035
39624	18	64.1	Chroococcales	5	NA	NA
39646	18	128.7	Firmicutes	6	0	0.155172
39658	18	166.6	Flavobacteriales	5	0.564935	0.469828
39674	18	191.8	Xanthomonadales	5	0.207792	0.00287356
39675	18	121.1	Chroococcales	5	NA	NA
39779	18	134.5	Chroococcales	5	NA	NA
39813	18	445.3	Campylobacterales	5	NA	NA
39818	18	227.7	Proteobacteria	6	0.0941558	0.0833333
39823	18	263.9	Enterobacteriales	5	NA	NA
39867	18	112.1	Enterobacteriales	5	0	0.00574713
39882	18	191.6	Proteobacteria	6	NA	NA
39887	18	438.8	Proteobacteria	6	0.704545	0
39921	18	110.2	Lactobacillales	5	0	0.301724
39962	18	353.1	Pseudomonadales	5	0.944805	0.00718391
39990	18	484.8	Rhizobiales	5	0.0941558	0.00431035
39997	18	178.1	Firmicutes	6	0	0.16523
40014	18	194.2	Bacteria	7	0.188312	0
40047	18	144.1	Chroococcales	5	NA	NA
40051	18	188.8	Bacteroidales	5	0.0649351	0.636494
40075	18	148.1	Chroococcales	5	NA	NA
40112	18	125.9	Chroococcales	5	NA	NA
40121	18	159.3	Burkholderiales	5	0.00974026	0
40141	18	111.2	Lactobacillales	5	0	0.262931
40151	18	84.4	Chroococcales	5	NA	NA
40171	18	113.6	Firmicutes	6	0	0.100575
40205	18	360.8	Proteobacteria	6	0.0454545	0
40214	18	234.3	Chroococcales	5	NA	NA
40238	18	130.7	Bacillales	5	NA	NA
40354	17	59.7	Flavobacteriales	5	0.941558	0.303161
40391	17	149.2	Chroococcales	5	NA	NA
40395	17	65	Thermoanaerobacterales	5	NA	NA
40412	17	123.4	Lactobacillales	5	0	0.0977011
40415	17	174.6	Vibrionales	5	0.201299	0
40465	17	103.8	Rhizobiales	5	NA	NA
40525	17	88.5	Firmicutes	6	0	0.188218
40544	17	154.3	Burkholderiales	5	NA	NA
40548	17	498.7	Actinobacteria	6	0.207792	0.0172414
40570	17	202.6	Chroococcales	5	NA	NA
40571	17	560.6	Bacteroidetes	6	0.613636	0.734195
40584	17	139.1	Burkholderiales	5	0.123377	0
40689	17	173	Burkholderiales	5	NA	NA
40711	17	516.8	Sphingomonadales	5	0.756494	0.00143678
40744	17	174.1	Xanthomonadales	5	NA	NA
40773	17	126.2	Bacillales	5	NA	NA
40852	17	189.9	Pseudomonadales	5	0.038961	0
40920	17	106.3	Chroococcales	5	0.0162338	0
40924	17	125.9	Prochlorales	5	0.886364	0
40968	17	142.4	Chroococcales	5	0	0.00143678
41009	17	228.9	Firmicutes	6	0	0.211207
41063	17	152.4	Alteromonadales	5	0.935065	0
41073	17	76.5	Firmicutes	6	0	0.0818966
41131	17	118.3	Rhodobacterales	5	0.308442	0
41147	17	220.6	Flavobacteriales	5	0.86039	0
41160	17	341.5	Chroococcales	5	0.931818	0
41211	17	252.2	Alteromonadales	5	0.149351	0
41213	17	292.9	Alteromonadales	5	0.0909091	0.00287356
41224	17	581.5	Cyanobacteria	6	0.0324675	0
41226	17	126.5	Enterobacteriales	5	NA	NA
41232	17	141.5	Proteobacteria	6	0.681818	0.00431035
41233	17	157.5	Flavobacteriales	5	0.707792	0
41329	17	185.3	Bacteria	7	0.386364	0.0862069
41333	17	151.5	Proteobacteria	6	NA	NA
41339	17	490.3	Proteobacteria	6	0.0941558	0.0201149
41394	17	490.7	Proteobacteria	6	0	0.00862069
41431	17	154.1	Chroococcales	5	0.873377	0
41469	17	697.5	Actinobacteria	6	NA	NA
41475	17	230.9	Proteobacteria	6	0.217532	0.166667
41519	17	98.1	Rhizobiales	5	0.172078	0.00143678
41553	17	83.2	Burkholderiales	5	NA	NA
41566	17	191.2	Vibrionales	5	0.133117	0
41624	17	85.1	Chroococcales	5	0.840909	0
41633	17	127.4	Chroococcales	5	0.75974	0
41644	17	366.2	Nostocales	5	0.00974026	0
41653	17	84.5	Chroococcales	5	0.87987	0
41660	17	144.2	Cyanobacteria	6	NA	NA
41668	17	352.5	Cyanobacteria	6	NA	NA
41675	17	186.5	Caulobacterales	5	0.931818	0
41685	17	128.4	Chroococcales	5	NA	NA
41800	17	145.9	Alteromonadales	5	0.594156	0
41806	17	205.8	Chroococcales	5	NA	NA
41811	17	112.4	Cyanobacteria	6	NA	NA
41823	17	305.2	Proteobacteria	6	0.0324675	0
41835	17	591.6	Burkholderiales	5	0.597403	0
41841	17	107.8	Clostridiales	5	0	0.0775862
41862	17	117.7	Xanthomonadales	5	0	0.202586
41870	17	125.1	Vibrionales	5	0.103896	0
41877	17	120.2	Actinobacteria	6	NA	NA
41923	17	139.2	Proteobacteria	6	NA	NA
41925	17	164.2	unclassified	5	NA	NA
41930	17	171.1	Firmicutes	6	0	0.432471
41935	17	297.2	Pseudomonadales	5	0.0714286	0.0158046
41949	17	168.4	Thermotogae	6	0.152597	0.00143678
42000	17	101.6	Vibrionales	5	0.233766	0
42014	17	987	Bacteroidetes	6	0.522727	0.224138
42026	17	116.3	Proteobacteria	6	0	0.00718391
42028	17	141.9	Firmicutes	6	0	0.587644
42032	17	154.7	Chroococcales	5	0.922078	0
42033	17	271.1	Burkholderiales	5	0.038961	0.00287356
42067	17	187.5	Chroococcales	5	NA	NA
42079	17	210.5	Flavobacteriales	5	0.516234	0
42122	17	129.1	Chroococcales	5	NA	NA
42123	17	238.2	Proteobacteria	6	0.133117	0.0948276
42144	17	116.5	Desulfovibrionales	5	0	0.0359195
42152	17	237.2	Proteobacteria	6	0	0.0933908
42162	17	272.6	Proteobacteria	6	0.0227273	0
42188	17	244.2	Campylobacterales	5	0	0.0100575
42197	17	130.8	Prochlorales	5	0.883117	0
42215	17	157.6	Burkholderiales	5	0	0.00287356
42218	17	661.4	Proteobacteria	6	NA	NA
42243	17	137.2	Burkholderiales	5	0.198052	0
42286	17	195.4	Rhodobacterales	5	0.555195	0
42363	17	148.6	Proteobacteria	6	0.123377	0
42371	17	196.4	Rhizobiales	5	0.0487013	0.00143678
42414	17	234.9	Firmicutes	6	0	0.0172414
42427	17	150.5	Bacteria	7	0	0.126437
42437	17	192.1	Proteobacteria	6	0.0357143	0.155172
42467	17	130.2	Enterobacteriales	5	NA	NA
42482	17	349.1	Pseudomonadales	5	0.0357143	0.420977
42585	16	185.9	Flavobacteriales	5	0.577922	0.448276
42653	16	200	Lactobacillales	5	0	0.0445402
42680	16	227.6	Burkholderiales	5	0.0292208	0
42683	16	87.4	Alteromonadales	5	0.194805	0
42699	16	138.7	Vibrionales	5	NA	NA
42792	16	305.8	Proteobacteria	6	0.0324675	0.00287356
42839	16	133.1	Burkholderiales	5	0.0454545	0.270115
42861	16	95.2	Chroococcales	5	NA	NA
42863	16	104.1	Bacillales	5	0	0.00143678
42866	16	211.4	Burkholderiales	5	NA	NA
42887	16	103.8	Burkholderiales	5	0.133117	0.00143678
42981	16	145.8	Alteromonadales	5	0.0292208	0
43105	16	336.6	Actinobacteria	6	0.0909091	0.00431035
43123	16	1147.1	Bacteria	7	0.941558	0.0675287
43134	16	210.4	Chroococcales	5	NA	NA
43157	16	159.3	Enterobacteriales	5	0.0649351	0.066092
43165	16	961.4	Burkholderiales	5	NA	NA
43176	16	145.1	Clostridiales	5	0	0.159483
43229	16	292.1	Rhizobiales	5	0.344156	0
43259	16	328.6	Bacteria	7	NA	NA
43267	16	244.8	Xanthomonadales	5	0	0.00143678
43271	16	173.7	Xanthomonadales	5	NA	NA
43273	16	95.9	Burkholderiales	5	NA	NA
43282	16	141.4	Cyanobacteria	6	0.905844	0
43302	16	364.1	Actinobacteria	6	NA	NA
43397	16	155.9	Desulfuromonadales	5	NA	NA
43429	16	482.8	Neisseriales	5	0.0227273	0.590517
43446	16	142.6	Firmicutes	6	NA	NA
43508	16	122.7	Firmicutes	6	0	0.0143678
43514	16	211	Proteobacteria	6	0.808442	0
43578	16	195.3	Bacteria	7	NA	NA
43583	16	108.8	Vibrionales	5	0.13961	0
43590	16	86.7	Lactobacillales	5	0	0.0172414
43613	16	164.2	Chroococcales	5	NA	NA
43642	16	219.9	unclassified	5	0	0.00143678
43693	16	100.2	Chromatiales	5	NA	NA
43705	16	295.1	Proteobacteria	6	0.0422078	0
43714	16	250.9	Burkholderiales	5	0.363636	0.0862069
43719	16	79.2	Lactobacillales	5	0	0.0876437
43729	16	126	Pseudomonadales	5	0.0357143	0.00862069
43740	16	218.4	Proteobacteria	6	0.0844156	0
43753	16	141.3	Alteromonadales	5	0.266234	0
43783	16	122.8	Neisseriales	5	0	0.241379
43806	16	131.1	Burkholderiales	5	0.25	0
43817	16	164.1	Alteromonadales	5	0.0292208	0
43828	16	181.8	Enterobacteriales	5	0.412338	0.0905172
43959	16	75.6	Chroococcales	5	0.892857	0
43965	16	202.5	Desulfuromonadales	5	NA	NA
43993	16	148.3	Proteobacteria	6	NA	NA
43998	16	237.2	Proteobacteria	6	0.025974	0.0229885
44004	16	108.8	Proteobacteria	6	NA	NA
44021	16	326.7	Cyanobacteria	6	0.0584416	0
44040	16	105.9	Burkholderiales	5	0.805195	0.0172414
44070	16	151.1	Thermoanaerobacterales	5	NA	NA
44082	16	341.5	Flavobacteriales	5	0.694805	0
44085	16	218.6	Bacteria	7	0	0.66092
44094	16	107.9	Proteobacteria	6	NA	NA
44101	16	207.1	Firmicutes	6	0	0.469828
44103	16	237.1	Firmicutes	6	0	0.235632
44104	16	251.9	Proteobacteria	6	0.62013	0
44126	16	343.5	Burkholderiales	5	0.172078	0
44161	16	123.4	Firmicutes	6	NA	NA
44172	16	121.7	Bacillales	5	0	0.0632184
44187	16	1156.3	Bacteria	7	0.980519	0.735632
44194	16	173.6	Proteobacteria	6	NA	NA
44239	16	163.5	Flavobacteriales	5	0.75974	0.475575
44250	16	88	Chroococcales	5	0.883117	0
44260	16	320.8	Vibrionales	5	0.149351	0
44262	16	396.4	Nostocales	5	0.0194805	0.00143678
44270	16	96.5	Bacillales	5	NA	NA
44305	16	597.7	Chroococcales	5	0.766234	0
44338	16	333.6	Bacteroidetes	6	0.0357143	0.566092
44345	16	110.1	Flavobacteriales	5	0.483766	0
44419	16	103.8	Lactobacillales	5	0	0.0100575
44427	16	148.8	Flavobacteriales	5	0.435065	0
44434	16	300.2	Bifidobacteriales	5	0.0422078	0.12069
44460	16	120.4	Alteromonadales	5	0.987013	0.00143678
44479	16	118.1	Clostridiales	5	0	0.202586
44494	16	360.9	Enterobacteriales	5	0.0876623	0
44511	16	287.3	Bacteroidetes	6	0.0162338	0.268678
44536	16	77.7	Neisseriales	5	0	0.350575
44558	16	86	Burkholderiales	5	0.327922	0.0114943
44577	16	133.4	Vibrionales	5	0.113636	0
44627	16	725.7	Vibrionales	5	0.347403	0
44643	16	194.5	Alteromonadales	5	0.0324675	0
44670	16	146.1	Proteobacteria	6	0.321429	0.0100575
44673	16	66.6	Burkholderiales	5	0.457792	0
44703	16	190.9	Proteobacteria	6	0.373377	0.0531609
44748	16	136.3	Proteobacteria	6	0.847403	0
44752	16	155.7	Neisseriales	5	NA	NA
44792	16	364.9	Proteobacteria	6	0.295455	0
44850	15	107.9	Chroococcales	5	0.834416	0
44911	15	203.3	Desulfovibrionales	5	0.038961	0
44916	15	151.5	Bacteroidetes	6	0	0.00143678
44925	15	307.7	Clostridiales	5	0	0.20977
45014	15	185.1	Rhizobiales	5	0.136364	0
45088	15	429	Proteobacteria	6	0.503247	0.00143678
45105	15	169.5	Alteromonadales	5	0.951299	0
45179	15	193.3	Bacillales	5	NA	NA
45188	15	218.4	Proteobacteria	6	0.555195	0
45211	15	694.5	Vibrionales	5	0.392857	0.00143678
45225	15	446.3	Archaea	7	0	0.00431035
45231	15	66	Chroococcales	5	NA	NA
45251	15	139.1	Clostridiales	5	NA	NA
45261	15	720.9	Xanthomonadales	5	NA	NA
45287	15	133.2	Flavobacteriales	5	0.61039	0
45296	15	99.9	Chlorobi	6	NA	NA
45312	15	109.1	Rhizobiales	5	NA	NA
45372	15	148.8	Bacteria	7	0	0.0517241
45400	15	82.9	Clostridiales	5	NA	NA
45483	15	104.1	Burkholderiales	5	0.321429	0.00143678
45489	15	124.2	Thermoanaerobacterales	5	NA	NA
45540	15	123.3	Clostridiales	5	0	0.0186782
45551	15	750.3	Bacteroidetes	6	0.0779221	0.25
45584	15	138.3	Desulfovibrionales	5	0.0454545	0.0258621
45588	15	70.5	Chroococcales	5	NA	NA
45660	15	126.8	Chroococcales	5	0.756494	0
45677	15	110.8	Firmicutes	6	0	0.182471
45701	15	102.1	Proteobacteria	6	0.0194805	0
45704	15	157.5	Rhizobiales	5	0.0519481	0
45776	15	934.8	Proteobacteria	6	1	0.112069
45899	15	66.3	Rhizobiales	5	0.0454545	0
45901	15	107.3	Burkholderiales	5	NA	NA
46014	15	141.3	Pseudomonadales	5	0.0194805	0.0100575
46035	15	768.2	Bacteria	7	0.301948	0.341954
46094	15	117.6	Actinobacteria	6	0.0292208	0
46109	15	126.6	Flavobacteriales	5	0.814935	0
46135	15	117.7	Firmicutes	6	NA	NA
46169	15	156.1	Bacillales	5	0	0.0172414
46191	15	522.5	Alteromonadales	5	0.61039	0.012931
46207	15	84.4	Bacteria	7	NA	NA
46232	15	120.6	Chroococcales	5	0.850649	0
46240	15	686.8	Burkholderiales	5	0.350649	0
46342	15	156.6	Bacillales	5	0	0.0905172
46376	15	355.3	Actinobacteria	6	0.133117	0.00143678
46399	15	110.3	Vibrionales	5	0.13961	0
46431	15	108.3	Proteobacteria	6	0.0194805	0
46464	15	213.3	Rhodobacterales	5	0.857143	0
46486	15	162.7	Proteobacteria	6	0.00324675	0
46528	15	231.5	Actinobacteria	6	NA	NA
46550	15	102.1	Chroococcales	5	0.821429	0
46553	15	220.6	Proteobacteria	6	NA	NA
46573	15	107.6	Clostridiales	5	NA	NA
46579	15	247.7	Alteromonadales	5	0.0292208	0
46580	15	295.7	Burkholderiales	5	NA	NA
46603	15	474.3	Rhizobiales	5	0.305195	0.00143678
46629	15	101.1	Burkholderiales	5	NA	NA
46652	15	67.4	Campylobacterales	5	0	0.00287356
46665	15	212.5	Bacillales	5	NA	NA
46669	15	153	Chroococcales	5	0.931818	0
46685	15	187.8	Desulfovibrionales	5	0.814935	0.0574713
46687	15	159.9	Clostridiales	5	0	0.00431035
46748	15	210.1	Proteobacteria	6	0.012987	0.0689655
46807	15	257.5	Alteromonadales	5	0.0194805	0
46882	15	71.4	Pseudomonadales	5	0.0779221	0
46939	15	92	Burkholderiales	5	0.425325	0.0100575
46951	15	233.1	Proteobacteria	6	0.243506	0
46963	15	148.7	Burkholderiales	5	0.123377	0.00574713
46999	15	173.5	Bacteria	7	1	0.0359195
47009	15	229.9	Rhizobiales	5	0.0876623	0
47019	15	806.9	Flavobacteriales	5	0.948052	0.557471
47022	15	367.3	Actinobacteria	6	NA	NA
47026	15	208.4	Proteobacteria	6	0.0746753	0
47034	15	105.6	Chroococcales	5	0.649351	0
47037	15	133.6	Proteobacteria	6	0.305195	0
47047	15	170.1	Rhizobiales	5	0.253247	0
47133	15	122.6	Chroococcales	5	0	0.00143678
47146	15	78.1	Chroococcales	5	0.737013	0
47158	15	315	Bacteria	7	0.107143	0.0301724
47160	15	119.8	Neisseriales	5	0	0.00718391
47199	15	95.6	Burkholderiales	5	NA	NA
47235	15	195.9	Proteobacteria	6	0	0.00574713
47244	15	185.5	Alteromonadales	5	0.795455	0
47260	15	169.1	Burkholderiales	5	NA	NA
47276	15	177.1	Burkholderiales	5	0.152597	0.00862069
47331	14	233.6	Proteobacteria	6	0.168831	0
47414	14	148.5	Clostridiales	5	NA	NA
47478	14	204.2	Flavobacteriales	5	0.558442	0
47658	14	153.4	Vibrionales	5	NA	NA
47672	14	187.7	Clostridiales	5	NA	NA
47718	14	255.2	Chroococcales	5	NA	NA
47740	14	229.1	Cyanobacteria	6	0.951299	0
47794	14	172.4	Campylobacterales	5	0	0.481322
47817	14	214.1	Bacteria	7	0	0.390805
47899	14	93	Burkholderiales	5	0.0227273	0.00143678
47901	14	116.4	Desulfuromonadales	5	NA	NA
47906	14	195.5	Firmicutes	6	0	0.727011
47954	14	181.2	Proteobacteria	6	0.0454545	0
47971	14	129.9	Legionellales	5	NA	NA
48039	14	338.7	Proteobacteria	6	0.340909	0
48049	14	179.1	Xanthomonadales	5	NA	NA
48088	14	84.6	Rhizobiales	5	0.0454545	0
48188	14	339.1	Pseudomonadales	5	0.909091	0
48189	14	76.6	Prochlorales	5	0.935065	0
48250	14	135.6	Enterobacteriales	5	0	0.0502874
48264	14	89.9	Prochlorales	5	0.775974	0
48268	14	116.1	Enterobacteriales	5	0.172078	0.00143678
48282	14	1588.1	Burkholderiales	5	0.0227273	0
48284	14	229.2	Burkholderiales	5	0.866883	0.0172414
48296	14	148.7	Pasteurellales	5	0	0.37931
48383	14	145.4	Alteromonadales	5	0.857143	0
48402	14	68.2	Alteromonadales	5	0.0454545	0
48418	14	56.4	Chroococcales	5	NA	NA
48424	14	233.6	Bacteroidetes	6	0.701299	0.727011
48428	14	307.1	Rhizobiales	5	NA	NA
48453	14	174.5	Enterobacteriales	5	0	0.0143678
48473	14	210.4	Bacteria	7	0.0649351	0
48521	14	183.1	Enterobacteriales	5	0.0649351	0.139368
48522	14	133.3	Desulfovibrionales	5	0.012987	0.0158046
48621	14	167.3	Proteobacteria	6	0	0.00143678
48674	14	148.9	Pasteurellales	5	0.0227273	0.445402
48680	14	144.9	Flavobacteriales	5	0.62013	0
48717	14	169.4	Bacteria	7	NA	NA
48729	14	270.8	Firmicutes	6	0.012987	0.0732759
48781	14	78.5	Firmicutes	6	0	0.291667
48816	14	198.9	Bacteria	7	NA	NA
48836	14	89.6	Chroococcales	5	NA	NA
48859	14	121.9	Chroococcales	5	0.811688	0
48880	14	321.7	Enterobacteriales	5	NA	NA
48892	14	224.1	Enterobacteriales	5	NA	NA
48896	14	586.1	Rhizobiales	5	0.0616883	0.00287356
48933	14	356.2	Proteobacteria	6	NA	NA
48943	14	383.9	Caulobacterales	5	0.814935	0
48956	14	469.3	Chroococcales	5	NA	NA
48958	14	58.9	Nostocales	5	NA	NA
49000	14	74.8	Vibrionales	5	0.0746753	0
49008	14	105.8	Pseudomonadales	5	0.0584416	0
49016	14	128.1	Rhizobiales	5	0.0422078	0
49036	14	317.1	Bacteroidetes	6	0.733766	0.211207
49043	14	116.8	Chroococcales	5	NA	NA
49052	14	123.9	Enterobacteriales	5	0	0.225575
49098	14	431.5	Bacteroidetes	6	0.519481	0.502874
49115	14	93.1	Bacteria	7	0.0519481	0.00143678
49136	14	278.3	Alteromonadales	5	0.925325	0.00143678
49138	14	189.1	Lactobacillales	5	0	0.00574713
49149	14	91.2	Proteobacteria	6	NA	NA
49168	14	129.6	Xanthomonadales	5	0.0227273	0
49216	14	164.1	Enterobacteriales	5	NA	NA
49235	14	83.8	Chroococcales	5	NA	NA
49238	14	1033	Bacteroidetes	6	0.136364	0.387931
49291	14	229.6	Enterobacteriales	5	0.142857	0.0373563
49354	14	202.5	Pseudomonadales	5	0.977273	0.00574713
49368	14	219	Vibrionales	5	0.918831	0
49379	14	234.1	Proteobacteria	6	0.0292208	0
49382	14	137.9	Burkholderiales	5	0.292208	0.00718391
49392	14	227.9	Burkholderiales	5	0.025974	0.00143678
49422	14	104.2	Pasteurellales	5	0	0.0301724
49429	14	499.7	Neisseriales	5	0	0.198276
49451	14	93.6	Enterobacteriales	5	0	0.012931
49459	14	90	Chroococcales	5	0.850649	0
49464	14	78.9	Prochlorales	5	0.785714	0
49496	14	157.4	Cyanobacteria	6	0	0.0431034
49508	14	417.9	Firmicutes	6	0	0.524425
49543	14	133.1	Rhodospirillales	5	0.61039	0
49570	14	150	Flavobacteriales	5	0.425325	0
49607	14	175.7	Proteobacteria	6	NA	NA
49635	14	215.4	Clostridiales	5	NA	NA
49639	14	121	Rhizobiales	5	NA	NA
49643	14	297.4	Proteobacteria	6	0.0519481	0.412356
49671	14	304.4	Flavobacteriales	5	0.503247	0
49682	14	189.6	Vibrionales	5	0.191558	0
49697	14	180.7	Vibrionales	5	0.818182	0
49703	14	158.6	Rhizobiales	5	0.207792	0
49713	14	309.1	Burkholderiales	5	0.298701	0.0186782
49723	14	194.9	Alteromonadales	5	0	0.00143678
49727	14	220.4	Proteobacteria	6	NA	NA
49808	14	200.4	Oceanospirillales	5	0.149351	0
49828	14	350.5	Enterobacteriales	5	0.0616883	0.00143678
49852	14	291.9	Enterobacteriales	5	0	0.0632184
49858	14	104.4	Chroococcales	5	NA	NA
49860	14	85.4	Chroococcales	5	0.840909	0
49872	14	375.1	Firmicutes	6	NA	NA
49892	14	300.3	Bacteroidetes	6	0	0.741379
49923	14	346.3	Chroococcales	5	NA	NA
49925	14	184.9	Alteromonadales	5	0.25974	0
49941	14	391.2	Actinobacteria	6	0.0649351	0.00143678
49947	14	338.2	Proteobacteria	6	0.275974	0.640805
49962	14	191.9	Pseudomonadales	5	0.0227273	0
50007	14	230.3	Burkholderiales	5	0.025974	0.00431035
50036	14	257.4	Bacteria	7	NA	NA
50055	14	97.6	Chroococcales	5	NA	NA
50130	14	179.6	Bacteria	7	0	0.133621
50168	14	196.8	Chlorobi	6	NA	NA
50190	14	69.2	Chroococcales	5	NA	NA
50193	14	316.6	Rhodobacterales	5	0.146104	0
50215	14	131.6	Flavobacteriales	5	0.49026	0
50219	14	193.8	Proteobacteria	6	NA	NA
50233	14	136.7	Proteobacteria	6	0.555195	0
50235	14	109.6	Rhizobiales	5	NA	NA
50242	14	147.2	Clostridiales	5	0	0.181034
50278	14	180.4	Pasteurellales	5	0	0.377874
50322	14	155.7	Cyanobacteria	6	0.269481	0
50324	14	210.6	Proteobacteria	6	0.474026	0.00574713
50339	14	74.5	Chroococcales	5	NA	NA
50359	14	48	Lactobacillales	5	0	0.00431035
50467	13	591.8	Firmicutes	6	0	0.333333
50582	13	403.9	Vibrionales	5	0.103896	0
50632	13	519.7	Chroococcales	5	0.805195	0
50664	13	247.9	Vibrionales	5	0.107143	0
50692	13	368.3	Bacillales	5	NA	NA
50707	13	161.3	Firmicutes	6	0	0.21408
50715	13	189.8	Enterobacteriales	5	NA	NA
50780	13	334.7	Aquificae	6	0.288961	0.103448
50794	13	190.6	Alteromonadales	5	NA	NA
50846	13	132.5	Firmicutes	6	0	0.0100575
50854	13	145.8	Bacteroidetes	6	0.866883	0
50925	13	99.4	Proteobacteria	6	NA	NA
50939	13	171.5	Clostridiales	5	0	0.58477
50988	13	87.4	Vibrionales	5	0.0487013	0
50998	13	170.9	Burkholderiales	5	0	0.00431035
51033	13	178.1	Chroococcales	5	0.730519	0
51041	13	74.8	Rhizobiales	5	NA	NA
51115	13	191	Clostridiales	5	NA	NA
51172	13	217	Pasteurellales	5	0	0.383621
51191	13	77.9	Nostocales	5	0	0.00287356
51197	13	232.1	Actinobacteria	6	NA	NA
51200	13	145.6	Chroococcales	5	NA	NA
51255	13	446.8	unclassified	5	0.983766	0
51267	13	155.6	Pseudomonadales	5	0.0551948	0.0100575
51280	13	175.8	Rhizobiales	5	0.113636	0.00143678
51307	13	126.7	Rhizobiales	5	0.116883	0
51369	13	157.8	Bacteroidetes	6	0.584416	0
51401	13	513.2	Rhizobiales	5	NA	NA
51439	13	189.9	Proteobacteria	6	0.948052	0
51509	13	113.8	Burkholderiales	5	NA	NA
51524	13	171.5	Flavobacteriales	5	0.431818	0
51575	13	203.9	Xanthomonadales	5	0.0227273	0.00143678
51729	13	446.3	Chroococcales	5	0.87013	0
51736	13	96.5	Pseudomonadales	5	0.678571	0.00718391
51918	13	236.8	Vibrionales	5	0.873377	0.00143678
51920	13	155.1	Alteromonadales	5	0.438312	0
51923	13	243.5	Burkholderiales	5	0.266234	0
51946	13	149.5	Firmicutes	6	NA	NA
51961	13	88.2	Clostridiales	5	0	0.336207
51968	13	377.4	Proteobacteria	6	0.152597	0.218391
52017	13	328.8	Clostridiales	5	NA	NA
52026	13	164.7	Bacillales	5	NA	NA
52082	13	492.8	Proteobacteria	6	0.529221	0
52109	13	191.5	Clostridiales	5	0	0.0100575
52117	13	250.1	Chroococcales	5	NA	NA
52138	13	92	Chroococcales	5	0.0357143	0
52156	13	125.5	Proteobacteria	6	0.305195	0
52174	13	60.7	Vibrionales	5	0.0357143	0
52193	13	90.7	Vibrionales	5	0.11039	0
52267	13	189.5	Firmicutes	6	0	0.507184
52296	13	251	Methylophilales	5	NA	NA
52339	13	249.8	Rhizobiales	5	0.0649351	0
52397	13	102.3	Firmicutes	6	0	0.179598
52403	13	171.6	Vibrionales	5	0.0162338	0
52417	13	255.5	Actinobacteria	6	NA	NA
52426	13	252.5	Pseudomonadales	5	0.0876623	0.00287356
52512	13	273.2	Flavobacteriales	5	0.603896	0
52576	13	213.2	Burkholderiales	5	0.012987	0.00287356
52611	13	321.1	Cyanobacteria	6	NA	NA
52618	13	373.8	Proteobacteria	6	0.0454545	0.0143678
52632	13	174.4	Clostridiales	5	0	0.0775862
52640	13	274.7	Clostridiales	5	NA	NA
52698	13	652.2	Firmicutes	6	0.269481	0.0675287
52712	13	147.8	unclassified	5	0.11039	0
52811	13	872.1	Bacteroidetes	6	0.0194805	0.604885
52851	13	112.9	Chroococcales	5	NA	NA
52887	13	82.8	Rhizobiales	5	0.350649	0
52946	13	85.1	Firmicutes	6	NA	NA
52949	13	126.5	Rhizobiales	5	0.0714286	0
52990	13	394.5	Proteobacteria	6	0.646104	0
52993	13	216.5	Desulfovibrionales	5	NA	NA
53023	13	191.4	Proteobacteria	6	0.12013	0
53031	13	194	Xanthomonadales	5	0.0194805	0
53063	13	238.2	Chroococcales	5	NA	NA
53079	13	74.4	Chroococcales	5	NA	NA
53081	13	129.5	Firmicutes	6	0	0.0215517
53094	13	126.6	Burkholderiales	5	0.376623	0.012931
53168	13	680.5	Rhizobiales	5	0.483766	0.00287356
53187	13	63.2	Rhodobacterales	5	0.331169	0
53285	13	104.2	Firmicutes	6	0	0.686782
53312	13	225.8	Rhizobiales	5	NA	NA
53324	13	151.3	Firmicutes	6	NA	NA
53341	13	197.6	Archaea	7	NA	NA
53377	13	142.4	Neisseriales	5	0.0422078	0.147989
53378	13	188.9	Clostridiales	5	NA	NA
53420	13	227.1	Proteobacteria	6	0.0194805	0.568966
53447	13	150.8	Bacillales	5	NA	NA
53452	13	457.8	Alteromonadales	5	0.0649351	0.00287356
53494	13	295.3	Proteobacteria	6	0	0.00862069
53500	13	117.2	Firmicutes	6	NA	NA
53517	13	150	Pseudomonadales	5	0.363636	0.00431035
53530	13	251.2	Firmicutes	6	0	0.295977
53545	13	208	Burkholderiales	5	0.402597	0.0114943
53570	13	223.1	Proteobacteria	6	0.0292208	0
53612	13	177.5	Enterobacteriales	5	0	0.228448
53613	13	280.2	Proteobacteria	6	0.149351	0
53616	13	97.2	Bacteria	7	NA	NA
53655	13	105.8	Pseudomonadales	5	0.0584416	0
53702	13	145.7	Chroococcales	5	NA	NA
53756	13	65.3	Nostocales	5	NA	NA
53770	13	184.8	Chroococcales	5	NA	NA
53788	13	261.4	Bacillales	5	0	0.0158046
53791	13	987.2	Enterobacteriales	5	0.0227273	0
53818	13	541.7	Bacteroidetes	6	0.103896	0.337644
53847	13	332	Actinobacteria	6	0.366883	0
53861	13	186.3	Flavobacteriales	5	0.49026	0
53884	13	582.3	Archaea	7	0	0.20546
53913	13	134.8	Pasteurellales	5	0	0.146552
53956	13	147.7	Burkholderiales	5	0.0616883	0.00143678
53963	13	435.6	Planctomycetes	6	0.347403	0
54005	13	313.8	Rhizobiales	5	0.0876623	0
54081	13	442.6	Burkholderiales	5	0.0357143	0.00143678
54113	12	120.2	Firmicutes	6	NA	NA
54114	12	407.2	Proteobacteria	6	0.00974026	0.462644
54148	12	392.8	Proteobacteria	6	0	0.265805
54153	12	458.9	Enterobacteriales	5	0.025974	0.00287356
54267	12	128.2	Rhizobiales	5	0.318182	0
54295	12	300.9	Proteobacteria	6	0.136364	0
54364	12	234.5	Prochlorales	5	0.922078	0
54416	12	404.3	Flavobacteriales	5	0.266234	0.522989
54461	12	77.2	Flavobacteriales	5	0.840909	0
54490	12	185.6	Sphingomonadales	5	0.642857	0
54506	12	77	Cyanobacteria	6	0	0.00143678
54581	12	75.8	Chroococcales	5	NA	NA
54584	12	118.2	Firmicutes	6	0	0.451149
54585	12	278.8	Firmicutes	6	0	0.00431035
54593	12	136.7	Firmicutes	6	0	0.166667
54661	12	148.2	Actinobacteria	6	0	0.00143678
54702	12	133.8	Bacteria	7	0	0.396552
54719	12	143.6	Pseudomonadales	5	0.334416	0.00287356
54722	12	308.6	Bacteria	7	0	0.143678
54803	12	221.7	Bacteria	7	0.314935	0
54808	12	205	Xanthomonadales	5	0.698052	0
54861	12	56.8	Lactobacillales	5	0	0.267241
54866	12	94.2	Burkholderiales	5	0.038961	0.0114943
54880	12	111.4	unclassified	5	0.0487013	0
54964	12	493.6	Burkholderiales	5	0.25974	0.390805
54987	12	66.4	Flavobacteriales	5	0.970779	0.409483
54991	12	101.6	Proteobacteria	6	NA	NA
55059	12	229.1	Alteromonadales	5	0.918831	0
55074	12	184.2	Proteobacteria	6	NA	NA
55099	12	159.6	Enterobacteriales	5	0	0.175287
55169	12	74.7	Actinobacteria	6	NA	NA
55173	12	100.8	Enterobacteriales	5	0	0.0431034
55237	12	394.3	Chroococcales	5	NA	NA
55274	12	109.7	Chroococcales	5	NA	NA
55346	12	256.1	Chroococcales	5	0.672078	0
55370	12	152.6	Chroococcales	5	0.792208	0
55441	12	134.6	Enterobacteriales	5	0	0.00143678
55457	12	227.5	Enterobacteriales	5	0	0.00574713
55463	12	117.5	Enterobacteriales	5	0	0.045977
55497	12	118.8	Bacteria	7	0.0194805	0.00431035
55507	12	719.5	Pseudomonadales	5	0.626623	0.0158046
55577	12	160.9	Clostridiales	5	0	0.079023
55603	12	176.2	Chloroflexales	5	NA	NA
55639	12	148.1	Burkholderiales	5	NA	NA
55640	12	494.2	Proteobacteria	6	0.0227273	0
55708	12	102.4	Fusobacteria	6	0.230519	0.033046
55725	12	213.9	Campylobacterales	5	0	0.0100575
55744	12	584.6	Proteobacteria	6	0.233766	0.192529
55781	12	504.3	Proteobacteria	6	0.405844	0.386494
55806	12	484.1	Proteobacteria	6	0.194805	0.156609
55833	12	623.4	Alteromonadales	5	0.974026	0
55841	12	173.8	Firmicutes	6	NA	NA
55856	12	97.4	Chroococcales	5	0.733766	0
55861	12	116.8	Rhodobacterales	5	0.207792	0
55875	12	142.1	Proteobacteria	6	NA	NA
55907	12	128.5	Bacillales	5	NA	NA
56022	12	99.6	Chroococcales	5	0.623377	0
56043	12	301.3	Firmicutes	6	0.00649351	0.66954
56059	12	158.8	Chroococcales	5	NA	NA
56069	12	212.8	Burkholderiales	5	0.159091	0.0258621
56121	12	388.9	Desulfuromonadales	5	NA	NA
56145	12	201.5	Rhizobiales	5	0.0162338	0
56192	12	158.8	Xanthomonadales	5	NA	NA
56200	12	233.8	Enterobacteriales	5	0	0.0172414
56209	12	323.9	Proteobacteria	6	NA	NA
56233	12	57.5	Bacteria	7	0.0194805	0
56250	12	549.6	Rhizobiales	5	0.012987	0
56256	12	336.2	Burkholderiales	5	0.103896	0
56262	12	100.9	Chroococcales	5	0.733766	0
56275	12	97.6	Chroococcales	5	0.811688	0
56330	12	202.1	Bacteroidetes	6	0.0454545	0.403736
56339	12	341.4	Vibrionales	5	0.412338	0
56340	12	312.7	Alteromonadales	5	0.0454545	0
56347	12	326.3	Bacteroidetes	6	0.012987	0.162356
56352	12	272.2	Nostocales	5	NA	NA
56404	12	600.6	Proteobacteria	6	0.0746753	0
56495	12	189.8	Pseudomonadales	5	0	0.00287356
56522	12	453.9	Proteobacteria	6	0.438312	0.0186782
56523	12	337.2	Bacteria	7	0.431818	0.012931
56541	12	87.7	Chroococcales	5	NA	NA
56542	12	109.2	Vibrionales	5	0.11039	0
56583	12	166.9	Rickettsiales	5	NA	NA
56657	12	105.6	Bacteroidetes	6	0	0.308908
56663	12	198.8	Desulfovibrionales	5	0	0.0143678
56667	12	171.2	Prochlorales	5	0.912338	0
56668	12	275.8	Firmicutes	6	0	0.452586
56699	12	71.2	Rhodobacterales	5	0.198052	0
56715	12	138.7	Firmicutes	6	0	0.0316092
56744	12	212.2	Rhodobacterales	5	0.814935	0
56798	12	107.5	Rhizobiales	5	0	0.00143678
56812	12	253.2	Bacteroidetes	6	0.483766	0
56831	12	87.2	Proteobacteria	6	0.396104	0
56834	12	489.9	Actinobacteria	6	NA	NA
56846	12	292	Chroococcales	5	0.542208	0
56919	12	467.7	Rhodobacterales	5	0.470779	0
56941	12	217.2	Enterobacteriales	5	0	0.00431035
56959	12	86.2	Chroococcales	5	NA	NA
56968	12	218.8	Bacillales	5	NA	NA
56970	12	499.6	Bacillales	5	0	0.00143678
57018	12	297.9	Proteobacteria	6	0.0227273	0.439655
57068	12	557.8	Proteobacteria	6	0.334416	0.00143678
57106	12	154.2	Vibrionales	5	0.662338	0
57157	12	139.6	Proteobacteria	6	NA	NA
57175	12	118.9	Actinobacteria	6	0.0292208	0.00143678
57179	12	571.8	Alteromonadales	5	0.0454545	0.00143678
57182	12	170.8	Actinobacteria	6	0.0194805	0
57218	12	84.6	Chroococcales	5	0.753247	0
57232	12	332.9	Desulfuromonadales	5	0	0.00143678
57234	12	545.1	Enterobacteriales	5	0.0292208	0
57249	12	88.9	Chroococcales	5	0.762987	0
57255	12	396.1	Proteobacteria	6	NA	NA
57270	12	79.2	Flavobacteriales	5	0.366883	0
57282	12	232.5	Enterobacteriales	5	0.545455	0.0761494
57297	12	90.3	Rhizobiales	5	NA	NA
57304	12	143.5	Enterobacteriales	5	NA	NA
57317	12	151.5	Sphingobacteriales	5	0	0.24569
57319	12	895.8	Eukaryota	7	0.811688	0
57356	12	274	Clostridiales	5	NA	NA
57374	12	147.6	Enterobacteriales	5	NA	NA
57375	12	167.8	Chroococcales	5	0.821429	0
57421	12	376.1	Proteobacteria	6	0.24026	0.145115
57505	12	146.7	Clostridiales	5	NA	NA
57519	12	157.5	Vibrionales	5	NA	NA
57559	12	404.2	Pseudomonadales	5	0.025974	0.00143678
57569	12	172.5	Pseudomonadales	5	0.038961	0
57570	12	814.8	Desulfuromonadales	5	0.0714286	0
57579	12	121.6	Proteobacteria	6	0.00974026	0.00143678
57591	12	153.8	Xanthomonadales	5	NA	NA
57598	12	154.2	Bacteria	7	NA	NA
57608	12	567.4	Bacteria	7	0	0.0258621
57620	12	151.2	Proteobacteria	6	0.564935	0.0517241
57628	12	94.8	Alteromonadales	5	0.0227273	0
57651	12	113.8	Chroococcales	5	NA	NA
57668	12	109.9	Proteobacteria	6	0.0551948	0.0114943
57736	12	294.5	Burkholderiales	5	NA	NA
57750	12	731.3	Proteobacteria	6	0.123377	0.12931
57757	12	362.5	Enterobacteriales	5	NA	NA
57803	12	181.7	Proteobacteria	6	0.025974	0.0316092
57816	12	465.5	Pseudomonadales	5	0.253247	0.229885
57838	12	279.9	Proteobacteria	6	0.246753	0.0603448
57871	12	133.5	Actinobacteria	6	0.123377	0
57873	12	57.8	Chroococcales	5	0.616883	0
57877	12	100.5	Flavobacteriales	5	0.477273	0
57896	12	387.4	Desulfovibrionales	5	0.0162338	0
57909	12	523.3	Actinobacteria	6	0.464286	0.00143678
57910	12	103.4	Flavobacteriales	5	0.818182	0
57999	12	318.5	Proteobacteria	6	0.012987	0.534483
58011	12	284.4	Actinobacteria	6	0.0746753	0
58024	12	321.3	Enterobacteriales	5	0	0.0114943
58042	12	139.2	Actinobacteria	6	0.0292208	0
58045	12	115.5	Enterobacteriales	5	0	0.012931
58053	12	176.4	Chroococcales	5	0.805195	0
58063	12	387.5	Actinobacteria	6	NA	NA
58065	12	129.2	Proteobacteria	6	0.86039	0.00718391
58073	12	157.7	Chlorobi	6	NA	NA
58075	12	159.1	Pseudomonadales	5	0.0194805	0
58101	12	124.1	Actinobacteria	6	NA	NA
58104	12	491.5	Proteobacteria	6	0.246753	0.0186782
58130	12	125.8	Actinobacteria	6	0.0519481	0.00143678
58138	12	236.7	Firmicutes	6	0	0.399425
58165	12	145.4	Enterobacteriales	5	0	0.00143678
58175	12	264.8	Proteobacteria	6	0.415584	0.119253
58197	12	61.3	Chroococcales	5	NA	NA
58199	12	189.8	Rhizobiales	5	0.012987	0
58214	12	308.4	Proteobacteria	6	0.0487013	0
58230	12	79.9	Rhizobiales	5	0.038961	0
58259	12	160	Sphingobacteriales	5	0.386364	0
58317	12	154.8	Vibrionales	5	0.100649	0
58320	12	105.3	Pseudomonadales	5	0	0.00143678
58433	11	174.5	Eukaryota	7	NA	NA
58475	11	404.3	Firmicutes	6	NA	NA
58492	11	115.2	Actinobacteria	6	0.012987	0
58550	11	287.4	Rhizobiales	5	NA	NA
58570	11	237.7	Burkholderiales	5	0.0909091	0.00143678
58586	11	108.9	Chroococcales	5	NA	NA
58638	11	182.7	Pseudomonadales	5	0.766234	0
58645	11	261.4	Bacteroidetes	6	0.0519481	0.591954
58721	11	295.6	Cyanobacteria	6	NA	NA
58741	11	158.4	Enterobacteriales	5	NA	NA
58762	11	125.8	Chlorobi	6	NA	NA
58827	11	199.2	Vibrionales	5	NA	NA
58842	11	200.1	Enterobacteriales	5	NA	NA
58861	11	117.6	Rhizobiales	5	0.314935	0
58866	11	103.3	Firmicutes	6	NA	NA
58880	11	258.4	Firmicutes	6	0	0.522989
58900	11	118.6	Proteobacteria	6	1	0
58918	11	402.5	Bacteria	7	0.698052	0.00431035
59042	11	427.9	Burkholderiales	5	0.243506	0.00718391
59052	11	213.6	Xanthomonadales	5	0	0.00143678
59079	11	155.6	Rhizobiales	5	0.0584416	0
59139	11	407.1	Clostridiales	5	NA	NA
59148	11	147	Chroococcales	5	NA	NA
59183	11	198.9	Proteobacteria	6	0.0292208	0
59189	11	247.2	Proteobacteria	6	0.655844	0
59194	11	181.3	Enterobacteriales	5	0	0.158046
59240	11	123.6	Chroococcales	5	NA	NA
59255	11	332.9	Cyanobacteria	6	0.025974	0.0890805
59290	11	322.9	Chroococcales	5	0.662338	0
59307	11	238.4	Sphingobacteriales	5	0.551948	0.00143678
59349	11	418.5	Burkholderiales	5	0	0.00431035
59371	11	299.9	Proteobacteria	6	0	0.139368
59402	11	71.7	Lactobacillales	5	0.0227273	0.485632
59420	11	261.5	Proteobacteria	6	0.0649351	0.0732759
59502	11	152.5	Pseudomonadales	5	0.162338	0.0100575
59528	11	84.3	Nostocales	5	0	0.00143678
59530	11	184.2	Chroococcales	5	0.837662	0
59552	11	127.8	Cyanobacteria	6	NA	NA
59558	11	243.9	Bacillales	5	NA	NA
59587	11	306.4	Rhodobacterales	5	0.409091	0
59617	11	67.2	Rhodospirillales	5	0.464286	0
59632	11	211.3	Cyanobacteria	6	NA	NA
59671	11	105.5	Rhizobiales	5	NA	NA
59672	11	151.2	Pseudomonadales	5	0.107143	0
59679	11	167.2	Bacillales	5	NA	NA
59696	11	182.9	Proteobacteria	6	0.0714286	0.0747126
59737	11	232.5	Actinobacteria	6	NA	NA
59745	11	115	Enterobacteriales	5	0.0357143	0.00431035
59802	11	387.9	Firmicutes	6	0.0324675	0.00431035
59806	11	139.5	Spirochaetes	6	0.0454545	0
59817	11	595.5	Alteromonadales	5	0.0292208	0
59836	11	94.4	Enterobacteriales	5	0.0162338	0
59839	11	171.7	Clostridiales	5	0	0.204023
59858	11	233.6	Proteobacteria	6	NA	NA
59876	11	249.5	Flavobacteriales	5	0.477273	0
59908	11	302.6	Burkholderiales	5	0.0162338	0
59911	11	76.5	Firmicutes	6	NA	NA
59925	11	529.6	Rhizobiales	5	0.0194805	0.00143678
59941	11	69.7	Vibrionales	5	0.025974	0
59942	11	176.6	Firmicutes	6	0	0.00143678
59974	11	202.1	Bacteria	7	0.0357143	0
59989	11	182.2	Enterobacteriales	5	0.012987	0.00287356
60019	11	178.1	Clostridiales	5	0	0.33908
60077	11	292.8	Pseudomonadales	5	0.0974026	0.00287356
60150	11	202.3	Bacillales	5	NA	NA
60151	11	196.5	Firmicutes	6	0	0.0517241
60156	11	116.8	Burkholderiales	5	0	0.109195
60203	11	254.4	Rhodobacterales	5	0.318182	0
60209	11	404.7	Bacteroidetes	6	0.519481	0
60213	11	323.8	Proteobacteria	6	0.188312	0.127874
60244	11	329.1	Proteobacteria	6	0.305195	0
60266	11	171.5	Enterobacteriales	5	0.0422078	0.066092
60268	11	264.3	Flavobacteriales	5	0.672078	0.00143678
60272	11	161.1	Nostocales	5	NA	NA
60290	11	219.8	Alteromonadales	5	0.951299	0
60389	11	199.1	Actinobacteria	6	0	0.281609
60473	11	237.6	Cyanobacteria	6	NA	NA
60475	11	470.6	Desulfovibrionales	5	0.0292208	0.357759
60484	11	205.5	Desulfovibrionales	5	NA	NA
60485	11	243.8	Rhizobiales	5	NA	NA
60530	11	220.5	Desulfuromonadales	5	NA	NA
60553	11	122.1	Firmicutes	6	0	0.143678
60578	11	135.1	Pseudomonadales	5	0.0876623	0.00143678
60583	11	140.7	Burkholderiales	5	NA	NA
60594	11	205	Firmicutes	6	0	0.670977
60651	11	342.2	Bacteria	7	0.025974	0.272989
60652	11	198.9	Cyanobacteria	6	NA	NA
60669	11	725.8	Bacteroidetes	6	0.288961	0.262931
60682	11	169.6	Pseudomonadales	5	0.107143	0.00143678
60714	11	191.5	Oceanospirillales	5	NA	NA
60719	11	147.4	Sphingomonadales	5	0.457792	0
60744	11	83.5	Proteobacteria	6	0.0811688	0
60747	11	134.8	Pseudomonadales	5	0.337662	0
60808	11	180.5	unclassified	5	NA	NA
60817	11	117.7	Bacillales	5	NA	NA
60854	11	176.5	Flavobacteriales	5	0.292208	0
60858	11	176.8	Proteobacteria	6	NA	NA
60892	11	501.8	Enterobacteriales	5	0	0.00718391
60969	11	126.5	Bacteria	7	0	0.00718391
60995	11	160.6	Actinobacteria	6	NA	NA
61081	11	256.2	Proteobacteria	6	0	0.0158046
61120	11	323	Rhizobiales	5	NA	NA
61122	11	151.7	Fusobacteriales	5	0	0.531609
61125	11	463.3	Flavobacteriales	5	0.587662	0
61140	11	114.8	Xanthomonadales	5	NA	NA
61188	11	159	Xanthomonadales	5	0.0162338	0.00143678
61270	11	336.5	Burkholderiales	5	NA	NA
61275	11	109.5	Alteromonadales	5	0.298701	0
61302	11	183	Actinobacteria	6	0.0779221	0.00143678
61311	11	125.9	Firmicutes	6	NA	NA
61343	11	93.1	Bacillales	5	0	0.00287356
61371	11	141.9	Bacteria	7	NA	NA
61374	11	353.5	Thermoanaerobacterales	5	NA	NA
61375	11	440.2	Actinobacteria	6	NA	NA
61423	11	73.8	Archaea	7	0.0616883	0
61533	11	144.2	Proteobacteria	6	0.165584	0.0143678
61536	11	72.9	Rhizobiales	5	0.0487013	0
61538	11	124.7	Burkholderiales	5	NA	NA
61570	11	721.6	Firmicutes	6	0	0.66954
61645	11	68.6	Chroococcales	5	0.792208	0
61652	11	141.7	Firmicutes	6	0	0.449713
61656	11	324.4	Proteobacteria	6	0.0714286	0.0215517
61693	11	171.4	Proteobacteria	6	NA	NA
61717	11	174.7	Clostridiales	5	NA	NA
61721	11	193.8	Proteobacteria	6	0.133117	0
61724	11	531.4	Rhodocyclales	5	0.275974	0
61738	11	238.5	Pseudomonadales	5	0.0844156	0.00431035
61770	11	286.9	Legionellales	5	NA	NA
61795	11	246.3	Actinobacteria	6	0.025974	0
61870	11	104.2	Desulfovibrionales	5	NA	NA
61889	11	277.2	Proteobacteria	6	0.886364	0.454023
61891	11	514.6	Proteobacteria	6	0.896104	0
61897	11	85.3	Chroococcales	5	0.571429	0
61912	11	461.5	Bacteria	7	0.0227273	0
61913	11	216.9	Chlamydiae	6	NA	NA
61928	11	140.8	Rhizobiales	5	0.00974026	0
61956	11	249.5	Proteobacteria	6	0.0844156	0.570402
61996	11	152.4	Clostridiales	5	NA	NA
62024	11	292.5	Actinobacteria	6	NA	NA
62025	11	151.8	Firmicutes	6	0	0.627874
62073	11	97.9	Rhodobacterales	5	0.0681818	0
62092	11	105.2	Cyanobacteria	6	NA	NA
62097	11	70.2	Alteromonadales	5	0.327922	0
62135	11	246.4	Chroococcales	5	NA	NA
62139	11	112.1	Proteobacteria	6	0	0.478448
62228	11	175.5	Chroococcales	5	0.834416	0
62234	11	101.4	Pseudomonadales	5	0.12013	0
62240	11	68.2	Bifidobacteriales	5	0	0.0531609
62242	11	151.5	Proteobacteria	6	0.107143	0
62289	11	509.4	Campylobacterales	5	0	0.012931
62355	11	200.5	Proteobacteria	6	0	0.00718391
62357	11	125.2	Firmicutes	6	0	0.366379
62369	11	478.8	Burkholderiales	5	0.37013	0
62381	11	449.9	Actinobacteria	6	NA	NA
62411	11	622.5	Burkholderiales	5	0.0909091	0
62435	11	434.4	Proteobacteria	6	0	0.139368
62469	11	107.4	Campylobacterales	5	0	0.426724
62486	11	375.7	Xanthomonadales	5	0.707792	0.00287356
62493	11	119.2	Vibrionales	5	0.0649351	0
62500	11	354.9	Alteromonadales	5	0.905844	0
62507	11	110.8	Enterobacteriales	5	0	0.0502874
62510	11	100.8	Desulfuromonadales	5	NA	NA
62511	11	108.5	Firmicutes	6	0	0.173851
62512	11	162.9	Vibrionales	5	0.149351	0
62548	11	172.4	Xanthomonadales	5	NA	NA
62554	11	156.5	Rhodobacterales	5	0.720779	0
62581	11	158.5	Xanthomonadales	5	0	0.00143678
62605	11	149.1	Actinobacteria	6	NA	NA
62668	11	223.9	Neisseriales	5	0	0.00143678
62674	11	272.7	Vibrionales	5	0.113636	0
62724	11	510.5	Burkholderiales	5	NA	NA
62764	11	262.6	Bacteria	7	0.376623	0
62805	11	403	Proteobacteria	6	0	0.0229885
62818	11	218	Proteobacteria	6	0.0227273	0.362069
62825	11	135.5	Actinobacteria	6	0	0.354885
62839	11	263.3	Clostridiales	5	0	0.215517
62850	11	132.7	Bacteria	7	0.012987	0
62860	11	346.5	Pseudomonadales	5	0.821429	0
62866	11	105.8	Chroococcales	5	0.792208	0
62898	11	92.7	Actinobacteria	6	NA	NA
62904	11	923.5	Actinobacteria	6	0	0.00143678
62937	11	120.5	Rhizobiales	5	0.0357143	0
62943	11	273.3	Proteobacteria	6	0.207792	0.00143678
62951	11	148.3	Enterobacteriales	5	0.415584	0.0603448
62952	11	166.9	Eukaryota	7	NA	NA
62970	11	254.1	Enterobacteriales	5	0.038961	0.326149
62977	11	163.5	Pasteurellales	5	0	0.553161
62986	11	91.1	Dehalococcoidales	5	0.0519481	0
63008	11	452.3	Chroococcales	5	0.704545	0
63009	11	598.8	Burkholderiales	5	0.0811688	0
63021	11	221.8	Pseudomonadales	5	0.409091	0.00574713
63025	11	356.7	Vibrionales	5	NA	NA
63030	11	138.5	Clostridiales	5	0	0.00143678
63043	11	319.3	Vibrionales	5	0.178571	0
63047	11	311.7	Cyanobacteria	6	0.00649351	0.0114943
63056	11	154.7	Rhodobacterales	5	0.805195	0.00143678
63063	11	320	Proteobacteria	6	0.100649	0.00718391
63110	11	245.7	Proteobacteria	6	0	0.612069
63114	11	66.5	Bacteria	7	0.00649351	0.00287356
63137	11	468.7	Bacteria	7	NA	NA
63143	11	198.9	Enterobacteriales	5	0.025974	0.0100575
63190	11	229.1	Bacteroidales	5	0	0.206897
63194	11	204.7	Chroococcales	5	NA	NA
63199	11	120.3	Alteromonadales	5	0.0811688	0
63208	11	120.6	Thermoanaerobacterales	5	NA	NA
63214	11	122.6	Xanthomonadales	5	0	0.143678
63238	11	96.5	Chroococcales	5	0.551948	0
63273	11	165.5	Vibrionales	5	0.0422078	0
63331	11	148.6	Campylobacterales	5	0	0.353448
63362	11	100.8	Bacillales	5	0	0.00431035
63389	11	153.9	Proteobacteria	6	0.0227273	0.00143678
63403	11	203.1	Myxococcales	5	NA	NA
63476	11	395.2	Firmicutes	6	0	0.0215517
63487	11	277.7	Proteobacteria	6	0.353896	0.100575
63522	11	156.8	Prochlorales	5	0.831169	0
63529	11	255.7	Vibrionales	5	0.0551948	0
63609	10	72.5	Cyanobacteria	6	0.853896	0
63689	10	112	Rhizobiales	5	NA	NA
63750	10	230.9	Proteobacteria	6	0.454545	0
63768	10	209	Sphingobacteriales	5	0.0487013	0
63808	10	256.1	Proteobacteria	6	0.266234	0.564655
63841	10	87.2	Rhizobiales	5	NA	NA
63842	10	182.4	Proteobacteria	6	NA	NA
63853	10	187.2	Bacteroidetes	6	0	0.438218
63870	10	315.7	Firmicutes	6	0	0.300287
63899	10	715.2	Xanthomonadales	5	0	0.00287356
63929	10	129	Clostridiales	5	NA	NA
63934	10	93.5	Proteobacteria	6	NA	NA
63964	10	162.9	Rhizobiales	5	0.948052	0
64065	10	398.9	Bacteroidales	5	0	0.20977
64072	10	333.6	Proteobacteria	6	0.386364	0
64079	10	161.9	Coriobacteriales	5	0	0.389368
64128	10	247.3	Burkholderiales	5	0.931818	0
64174	10	86.8	Nostocales	5	0	0.00143678
64188	10	93.3	Firmicutes	6	0	0.175287
64207	10	260.4	Bacteroidetes	6	0.366883	0.469828
64219	10	162.9	Proteobacteria	6	NA	NA
64259	10	346.4	Pseudomonadales	5	0.0551948	0.00143678
64286	10	328.6	Bacteria	7	0.262987	0.00143678
64349	10	412.5	Alteromonadales	5	0.941558	0
64410	10	135.5	Proteobacteria	6	NA	NA
64415	10	583.3	Rhizobiales	5	0	0.00143678
64481	10	81	Chroococcales	5	0.824675	0
64519	10	193.5	Alteromonadales	5	NA	NA
64532	10	120.3	Proteobacteria	6	0	0.178161
64535	10	298.6	Bacteria	7	NA	NA
64552	10	152.3	Burkholderiales	5	0.0324675	0.00287356
64556	10	113.6	Enterobacteriales	5	0	0.012931
64633	10	363.3	Burkholderiales	5	NA	NA
64641	10	270.1	Prochlorales	5	0.792208	0
64657	10	82.2	Lactobacillales	5	0	0.00574713
64691	10	191.2	Rhodobacterales	5	0.305195	0
64729	10	139.2	Pseudomonadales	5	0.243506	0.0344828
64769	10	66.7	Firmicutes	6	0	0.170977
64823	10	129.4	Prochlorales	5	0.824675	0
64902	10	177.7	Alteromonadales	5	0.321429	0.00143678
64917	10	127.7	Alteromonadales	5	0.753247	0
64957	10	223	Actinobacteria	6	0	0.406609
64968	10	1277.8	Nostocales	5	NA	NA
64970	10	289.5	Burkholderiales	5	0.269481	0
65039	10	160.4	Proteobacteria	6	NA	NA
65047	10	219.2	Actinobacteria	6	0.123377	0
65056	10	232	Burkholderiales	5	0.00974026	0.00287356
65058	10	117.6	Firmicutes	6	0	0.0186782
65067	10	162.7	Chroococcales	5	0.88961	0
65091	10	244	Proteobacteria	6	NA	NA
65101	10	153.9	Firmicutes	6	NA	NA
65123	10	85.1	Rhizobiales	5	0.0324675	0
65133	10	347.4	Rhizobiales	5	0.0227273	0
65141	10	107.4	Campylobacterales	5	0	0.0617816
65323	10	154.5	Proteobacteria	6	0.532468	0
65363	10	110	Proteobacteria	6	0	0.636494
65416	10	225	Firmicutes	6	0	0.0646552
65421	10	458.9	Rhodocyclales	5	0.474026	0.00287356
65458	10	434.6	Vibrionales	5	0.214286	0
65496	10	169.9	Enterobacteriales	5	0.0162338	0.0201149
65508	10	96	Firmicutes	6	0	0.0474138
65622	10	114.3	Firmicutes	6	NA	NA
65773	10	310.4	Vibrionales	5	0.0811688	0.00143678
65817	10	343.8	Vibrionales	5	0.185065	0
65847	10	542.3	Proteobacteria	6	0	0.156609
66044	10	112.7	Clostridiales	5	0	0.066092
66097	10	126.2	Chroococcales	5	NA	NA
66108	10	258.2	Pseudomonadales	5	0.038961	0.00143678
66152	10	212.7	Bacteroidetes	6	0	0.428161
66189	10	204.8	Proteobacteria	6	0.025974	0
66206	10	256.9	Proteobacteria	6	0.0941558	0
66218	10	385.3	Pseudomonadales	5	0.0909091	0
66230	10	81.9	Xanthomonadales	5	0.0584416	0.0287356
66282	10	159.4	Eukaryota	7	0	0.0603448
66316	10	255.4	Bacillales	5	0	0.00862069
66327	10	194.7	Xanthomonadales	5	NA	NA
66351	10	200.8	Pasteurellales	5	0.25974	0.00287356
66406	10	192.1	Proteobacteria	6	0.0487013	0.00143678
66422	10	170.7	Chroococcales	5	0.714286	0
66429	10	138.8	Pseudomonadales	5	NA	NA
66432	10	488.9	Burkholderiales	5	0	0.00143678
66439	10	152.8	Chroococcales	5	NA	NA
66444	10	227.5	Proteobacteria	6	NA	NA
66454	10	134.3	Proteobacteria	6	0	0.183908
66473	10	96.2	Pseudomonadales	5	0.025974	0
66512	10	113.9	Proteobacteria	6	NA	NA
66513	10	85	Nostocales	5	NA	NA
66527	10	141.3	Sphingobacteriales	5	0	0.362069
66530	10	301.4	Firmicutes	6	0	0.172414
66547	10	261	Fusobacteria	6	0	0.570402
66570	10	266.8	Flavobacteriales	5	0.597403	0
66587	10	107.8	Burkholderiales	5	0.0162338	0.00143678
66598	10	436.1	Archaea	7	0	0.16523
66657	10	296.2	Vibrionales	5	NA	NA
66669	10	160.3	Enterobacteriales	5	0.0876623	0.0431034
66703	10	106.2	Rhizobiales	5	0.00974026	0
66719	10	166.5	Cyanobacteria	6	NA	NA
66764	10	114.6	Nostocales	5	NA	NA
66767	10	226.9	Vibrionales	5	0.0876623	0
66784	10	239.8	Proteobacteria	6	NA	NA
66812	10	214	Proteobacteria	6	0	0.0100575
66813	10	202.3	Desulfovibrionales	5	NA	NA
66845	10	303.5	Enterobacteriales	5	0.0227273	0.0689655
66891	10	269.2	Bacillales	5	0	0.0359195
66902	10	78.3	Rhizobiales	5	NA	NA
66943	10	124.2	Proteobacteria	6	NA	NA
66990	10	190.9	Enterobacteriales	5	0.185065	0
67001	10	465	Firmicutes	6	0	0.224138
67020	10	179.4	Rhodobacterales	5	0.038961	0
67056	10	62.3	Cyanobacteria	6	NA	NA
67196	10	139.2	Cyanobacteria	6	NA	NA
67217	10	493.1	Actinobacteria	6	NA	NA
67247	10	230.2	Nitrosomonadales	5	NA	NA
67277	10	80.8	Rhizobiales	5	NA	NA
67288	10	317.1	Proteobacteria	6	0.305195	0
67325	10	97.1	Pasteurellales	5	0.025974	0.00143678
67367	10	449	Bacteroidales	5	0	0.168103
67370	10	210.2	Flavobacteriales	5	0.288961	0.0114943
67371	10	106.5	Proteobacteria	6	0.0194805	0
67388	10	119.1	Thermi	6	NA	NA
67395	10	188	Bacteria	7	NA	NA
67407	10	168.9	Firmicutes	6	NA	NA
67415	10	112.3	Rhizobiales	5	0.038961	0
67424	10	185.2	Firmicutes	6	NA	NA
67438	10	46.3	Vibrionales	5	0.12013	0
67480	10	267.3	Clostridiales	5	0	0.277299
67513	10	93.6	Burkholderiales	5	0	0.00431035
67520	10	129.7	Rhizobiales	5	0.0551948	0
67542	10	56.2	Alteromonadales	5	0.0844156	0
67581	10	398.4	Proteobacteria	6	0.425325	0.168103
67610	10	258.5	Pseudomonadales	5	0.512987	0.00143678
67645	10	69	Proteobacteria	6	0.217532	0
67703	10	65	Vibrionales	5	0.0227273	0
67757	10	493.9	Bacteria	7	NA	NA
67782	10	784.3	Proteobacteria	6	0.152597	0
67788	10	244.5	Flavobacteriales	5	0.795455	0.00143678
67792	10	215.6	Bacillales	5	0	0.00143678
67793	10	426.2	Bacteria	7	0	0.0344828
67813	10	65.3	Bacteria	7	0.217532	0
67816	10	371.1	Cyanobacteria	6	0.681818	0.298851
67841	10	358.8	Bifidobacteriales	5	0	0.471264
67868	10	134.3	Rhizobiales	5	0.0876623	0
67872	10	383.7	Chloroflexi	6	0.0324675	0.00143678
67878	10	181.1	Flavobacteriales	5	0.464286	0
67931	10	89.1	Chroococcales	5	NA	NA
67961	10	56.1	Chroococcales	5	0.295455	0
67985	10	156.5	Vibrionales	5	0.123377	0
68009	10	243.4	Bacteria	7	0.0714286	0.159483
68058	10	87.7	Nostocales	5	NA	NA
68098	10	656.6	Pseudomonadales	5	NA	NA
68103	10	83.1	Rhizobiales	5	0.038961	0
68148	10	357.9	Burkholderiales	5	0.0974026	0.00287356
68228	10	232.2	Clostridiales	5	NA	NA
68255	10	223.7	Proteobacteria	6	0.409091	0
68261	10	148.8	Alteromonadales	5	0.0909091	0
68277	10	204.6	Burkholderiales	5	0.0909091	0
68288	10	619	Proteobacteria	6	0	0.0258621
68314	10	210.1	Cyanobacteria	6	0.886364	0
68354	10	381	Proteobacteria	6	0	0.033046
68411	10	124.9	Pseudomonadales	5	NA	NA
68427	10	283.4	Proteobacteria	6	NA	NA
68430	10	190.8	Burkholderiales	5	0.668831	0.00287356
68448	10	242.1	Cyanobacteria	6	0.0324675	0
68465	10	132.9	Rhodobacterales	5	0.646104	0
68487	10	263.8	Proteobacteria	6	0.0227273	0.00143678
68499	10	102.2	Proteobacteria	6	0.149351	0
68516	10	194.5	Proteobacteria	6	0	0.00718391
68518	10	250.8	Proteobacteria	6	0.162338	0
68527	10	92.7	Bacillales	5	0	0.0431034
68571	10	450.8	Pseudomonadales	5	0.0422078	0
68572	10	171.6	Caulobacterales	5	0.522727	0
68594	10	103	Rhizobiales	5	0.172078	0.00143678
68598	10	452.5	Proteobacteria	6	0.649351	0
68609	10	104.8	Rhizobiales	5	NA	NA
68611	10	192.9	Rhizobiales	5	0.107143	0.00143678
68616	10	368.5	Spirochaetes	6	0.363636	0
68622	10	200.9	Firmicutes	6	0	0.033046
68627	10	310.7	Pseudomonadales	5	0.0292208	0
68638	10	282.6	Nitrosomonadales	5	NA	NA
68668	10	235.8	Bacteroidales	5	0	0.208333
68684	10	386.5	Lactobacillales	5	0	0.0517241
68694	10	122.1	Rhodocyclales	5	0.0811688	0
68746	10	310.1	Firmicutes	6	0	0.198276
68766	10	460	Proteobacteria	6	0.0487013	0
68794	10	384.7	Vibrionales	5	NA	NA
68805	10	291.2	Proteobacteria	6	0.25974	0.0186782
68832	10	118.4	Cyanobacteria	6	0.0454545	0
68857	10	280.7	Burkholderiales	5	0.12987	0
68873	10	391.5	Flavobacteriales	5	0.327922	0.00143678
68909	10	141.3	Bacillales	5	NA	NA
68929	10	263.6	Bacteria	7	0.467532	0.00287356
68950	10	130.6	Cyanobacteria	6	NA	NA
68951	10	376.7	Bacillales	5	0	0.00574713
68962	10	99.1	Proteobacteria	6	NA	NA
68986	10	113.7	Pseudomonadales	5	0.025974	0
68993	10	427.8	Aeromonadales	5	0.194805	0
69003	10	599.9	Xanthomonadales	5	0.493506	0.00143678
69063	10	158.9	Pseudomonadales	5	0.012987	0.00143678
69067	10	256.6	Firmicutes	6	0.0422078	0
69086	10	159.7	Burkholderiales	5	0.0649351	0.0114943
69144	10	359.2	Pseudomonadales	5	0.0422078	0
69155	10	102.2	Proteobacteria	6	0.925325	0.00143678
69175	10	72.5	Clostridiales	5	0	0.0201149
69181	10	141.9	Proteobacteria	6	0.496753	0
69184	10	237.3	Fusobacteria	6	0.0616883	0.53592
69195	10	191.5	Nostocales	5	NA	NA
69231	10	171.6	Bacteroidetes	6	0.448052	0
69350	10	226.6	Rickettsiales	5	0	0.00574713
69373	10	370.3	Bacteria	7	0.107143	0.0158046
69378	10	169.1	Chroococcales	5	0.590909	0
69393	9	300.8	Proteobacteria	6	0.0454545	0.00143678
69470	9	306.1	Bacteria	7	NA	NA
69495	9	146.7	Rhizobiales	5	NA	NA
69531	9	1295.6	Firmicutes	6	0	0.308908
69604	9	237	Alteromonadales	5	0.961039	0
69675	9	225.2	Enterobacteriales	5	0	0.00143678
69691	9	323.9	Desulfuromonadales	5	NA	NA
69746	9	200	Rhodocyclales	5	NA	NA
69753	9	290.2	Chroococcales	5	0.0194805	0
69865	9	215.9	Proteobacteria	6	0	0.445402
69883	9	158.2	Rhizobiales	5	0.467532	0
69884	9	154	Rhizobiales	5	0.373377	0
69986	9	223.6	Rhodobacterales	5	0.357143	0
70047	9	330.6	Alteromonadales	5	0.944805	0
70059	9	142.6	Nostocales	5	NA	NA
70076	9	112.3	Enterobacteriales	5	NA	NA
70098	9	251.9	Burkholderiales	5	0.0162338	0.00143678
70105	9	77.1	Vibrionales	5	NA	NA
70135	9	229.9	Proteobacteria	6	0.00649351	0.0143678
70136	9	616.9	Vibrionales	5	0.107143	0.00143678
70164	9	100	Bacteria	7	NA	NA
70205	9	654.8	Proteobacteria	6	0.305195	0
70312	9	228.9	Burkholderiales	5	0.0194805	0
70337	9	201.6	Proteobacteria	6	0.288961	0.0143678
70341	9	145.9	Firmicutes	6	0	0.091954
70347	9	116.1	Proteobacteria	6	NA	NA
70370	9	293	Proteobacteria	6	NA	NA
70393	9	201.8	Rhizobiales	5	0.243506	0
70420	9	277.9	Proteobacteria	6	NA	NA
70428	9	240.7	Pseudomonadales	5	0.00649351	0.00431035
70448	9	199.7	Flavobacteriales	5	0.185065	0.466954
70464	9	151.3	Enterobacteriales	5	NA	NA
70476	9	564.3	Actinobacteria	6	NA	NA
70482	9	135.4	Proteobacteria	6	NA	NA
70495	9	353.9	Campylobacterales	5	NA	NA
70526	9	120.2	Vibrionales	5	0.038961	0
70537	9	127.8	Vibrionales	5	NA	NA
70545	9	158.3	Proteobacteria	6	0.36039	0.00431035
70648	9	150.3	Rhodobacterales	5	0.529221	0
70677	9	199.8	Firmicutes	6	NA	NA
70749	9	77.3	Rhizobiales	5	NA	NA
70847	9	201.2	Proteobacteria	6	0.146104	0.301724
70851	9	130.7	Cyanobacteria	6	NA	NA
70863	9	181.2	Burkholderiales	5	0.577922	0.00143678
70874	9	205.2	Vibrionales	5	0.892857	0
70930	9	218	Proteobacteria	6	0.383117	0
70949	9	116.6	Aquificae	6	0.133117	0
71023	9	269.9	Rhizobiales	5	NA	NA
71043	9	267.3	Enterobacteriales	5	0	0.00862069
71045	9	208	Burkholderiales	5	NA	NA
71046	9	156.7	Bacteroidales	5	0	0.158046
71074	9	125.7	Proteobacteria	6	0	0.311782
71082	9	110.6	Actinobacteria	6	NA	NA
71149	9	176	Actinobacteria	6	NA	NA
71213	9	220.7	Burkholderiales	5	0	0.00143678
71275	9	88.4	Firmicutes	6	0	0.0272989
71276	9	108.2	Rhizobiales	5	0.63961	0
71294	9	165.6	Bacteria	7	NA	NA
71311	9	126.4	Chroococcales	5	NA	NA
71316	9	295.4	Flavobacteriales	5	0.636364	0
71342	9	124.3	Rhizobiales	5	0.0324675	0
71351	9	158.3	Proteobacteria	6	0.0227273	0
71365	9	159.3	Sphingomonadales	5	0.87987	0.00287356
71373	9	438.7	Proteobacteria	6	0.107143	0
71378	9	78.4	Rhodobacterales	5	0.487013	0.0100575
71388	9	199.2	Nostocales	5	NA	NA
71466	9	411.3	Proteobacteria	6	0.103896	0
71475	9	307.7	Bacteroidetes	6	0.00974026	0.136494
71489	9	540.2	Acidobacteria	6	NA	NA
71499	9	116.4	Prochlorales	5	0.87013	0
71508	9	134.4	Rhodobacterales	5	0.363636	0
71518	9	242.4	Clostridiales	5	0	0.0186782
71553	9	128.9	Bacillales	5	NA	NA
71579	9	131.6	Bacillales	5	NA	NA
71595	9	322.4	Firmicutes	6	0.0519481	0.37069
71640	9	126.3	Nostocales	5	NA	NA
71672	9	199.2	Vibrionales	5	NA	NA
71678	9	212.8	Proteobacteria	6	NA	NA
71702	9	219.7	Myxococcales	5	NA	NA
71717	9	116	Proteobacteria	6	NA	NA
71910	9	150.4	Actinobacteria	6	NA	NA
71911	9	156.1	Nostocales	5	NA	NA
71914	9	324	Rhizobiales	5	0.11039	0
71936	9	102.7	Lactobacillales	5	NA	NA
71946	9	171.1	Enterobacteriales	5	NA	NA
71950	9	159.8	Cyanobacteria	6	NA	NA
71970	9	440.3	Xanthomonadales	5	0.025974	0.422414
71975	9	228	Desulfuromonadales	5	NA	NA
71976	9	173.1	Rhizobiales	5	NA	NA
71981	9	134.2	Chroococcales	5	0.646104	0
72003	9	484.6	Eukaryota	7	0	0.00143678
72048	9	145.6	Campylobacterales	5	0	0.474138
72073	9	265.1	Desulfuromonadales	5	NA	NA
72098	9	139	Pseudomonadales	5	NA	NA
72154	9	226.6	Rhizobiales	5	0.0616883	0
72184	9	496.7	Proteobacteria	6	NA	NA
72198	9	231.9	Alteromonadales	5	0.938312	0
72228	9	135.8	Proteobacteria	6	NA	NA
72240	9	194.8	Rhizobiales	5	NA	NA
72271	9	251.9	Rhodobacterales	5	0.918831	0.00143678
72283	9	240.8	Proteobacteria	6	0.0974026	0.0186782
72296	9	139	Rhodocyclales	5	NA	NA
72303	9	629.4	Rhizobiales	5	0.12013	0.00143678
72409	9	320	Bacillales	5	0	0.00718391
72424	9	396.7	Burkholderiales	5	0.0519481	0.00862069
72435	9	191.8	Bacteria	7	NA	NA
72453	9	84.8	Proteobacteria	6	NA	NA
72457	9	132.9	Clostridiales	5	0	0.231322
72463	9	468.2	Proteobacteria	6	0.103896	0.0646552
72487	9	578.8	Eukaryota	7	NA	NA
72519	9	161.3	Clostridiales	5	0	0.331897
72536	9	350.9	Burkholderiales	5	0.922078	0.00287356
72618	9	78.4	Fusobacteria	6	0	0.702586
72620	9	233.6	Thermoanaerobacterales	5	NA	NA
72710	9	237.4	Clostridiales	5	0	0.191092
72733	9	120.8	Legionellales	5	0.0681818	0
72769	9	59.8	Chroococcales	5	0.724026	0
72813	9	412.7	Cyanobacteria	6	0.457792	0
72814	9	75.2	Chroococcales	5	0.561688	0
72816	9	44	Proteobacteria	6	NA	NA
[truncated: 4,669 more rows]
