# Supplementary material for: A most wanted list of conserved microbial protein families with no known domains
Source: PLoS One. 2018 Oct 17;13(10):e0205749. doi: 10.1371/journal.pone.0205749 (PMC6192648; doi:10.1371/journal.pone.0205749)
Supplement: S2 Table — (XLSX) [file pone.0205749.s008.xlsx]

## Sheet: Column Definitions
Column Name	Definition
A	Protein ID, format is SFams FamilyID"_"ProteinID
B	UniProt ID of 100% identical blast hit
C to AG	UniProt xref annotations

## Sheet: UniProt xref Annotations
10686_645344227	P76573	EMBL:U00096	EMBL:AP009048	PIR:A65027	RefSeq:NP_417001.1	RefSeq:YP_490734.1	ProteinModelPortal:P76573	DIP:DIP-12040N	IntAct:P76573	STRING:511145.b2506	PRIDE:P76573	EnsemblBacteria:AAC75559	EnsemblBacteria:BAE76727	GeneID:12930652	GeneID:945168	KEGG:ecj:Y75_p2459	KEGG:eco:b2506	PATRIC:32120403	EchoBASE:EB3957	EcoGene:EG14205	eggNOG:NOG11897	HOGENOM:HOG000123074	OMA:QMELENM	OrthoDB:EOG6VTK4D	ProtClustDB:CLSK880415	BioCyc:EcoCyc:G7317-MONOMER	BioCyc:ECOL316407:JW2490-MONOMER	PRO:PR:P76573	Genevestigator:P76573	GO:GO:0006974	InterPro:IPR020231	ProDom:PD095266
10686_638691366	P76573	EMBL:U00096	EMBL:AP009048	PIR:A65027	RefSeq:NP_417001.1	RefSeq:YP_490734.1	ProteinModelPortal:P76573	DIP:DIP-12040N	IntAct:P76573	STRING:511145.b2506	PRIDE:P76573	EnsemblBacteria:AAC75559	EnsemblBacteria:BAE76727	GeneID:12930652	GeneID:945168	KEGG:ecj:Y75_p2459	KEGG:eco:b2506	PATRIC:32120403	EchoBASE:EB3957	EcoGene:EG14205	eggNOG:NOG11897	HOGENOM:HOG000123074	OMA:QMELENM	OrthoDB:EOG6VTK4D	ProtClustDB:CLSK880415	BioCyc:EcoCyc:G7317-MONOMER	BioCyc:ECOL316407:JW2490-MONOMER	PRO:PR:P76573	Genevestigator:P76573	GO:GO:0006974	InterPro:IPR020231	ProDom:PD095266
10686_637002473	P76573	EMBL:U00096	EMBL:AP009048	PIR:A65027	RefSeq:NP_417001.1	RefSeq:YP_490734.1	ProteinModelPortal:P76573	DIP:DIP-12040N	IntAct:P76573	STRING:511145.b2506	PRIDE:P76573	EnsemblBacteria:AAC75559	EnsemblBacteria:BAE76727	GeneID:12930652	GeneID:945168	KEGG:ecj:Y75_p2459	KEGG:eco:b2506	PATRIC:32120403	EchoBASE:EB3957	EcoGene:EG14205	eggNOG:NOG11897	HOGENOM:HOG000123074	OMA:QMELENM	OrthoDB:EOG6VTK4D	ProtClustDB:CLSK880415	BioCyc:EcoCyc:G7317-MONOMER	BioCyc:ECOL316407:JW2490-MONOMER	PRO:PR:P76573	Genevestigator:P76573	GO:GO:0006974	InterPro:IPR020231	ProDom:PD095266
10686_645348750	P76573	EMBL:U00096	EMBL:AP009048	PIR:A65027	RefSeq:NP_417001.1	RefSeq:YP_490734.1	ProteinModelPortal:P76573	DIP:DIP-12040N	IntAct:P76573	STRING:511145.b2506	PRIDE:P76573	EnsemblBacteria:AAC75559	EnsemblBacteria:BAE76727	GeneID:12930652	GeneID:945168	KEGG:ecj:Y75_p2459	KEGG:eco:b2506	PATRIC:32120403	EchoBASE:EB3957	EcoGene:EG14205	eggNOG:NOG11897	HOGENOM:HOG000123074	OMA:QMELENM	OrthoDB:EOG6VTK4D	ProtClustDB:CLSK880415	BioCyc:EcoCyc:G7317-MONOMER	BioCyc:ECOL316407:JW2490-MONOMER	PRO:PR:P76573	Genevestigator:P76573	GO:GO:0006974	InterPro:IPR020231	ProDom:PD095266
10686_638867020	P76573	EMBL:U00096	EMBL:AP009048	PIR:A65027	RefSeq:NP_417001.1	RefSeq:YP_490734.1	ProteinModelPortal:P76573	DIP:DIP-12040N	IntAct:P76573	STRING:511145.b2506	PRIDE:P76573	EnsemblBacteria:AAC75559	EnsemblBacteria:BAE76727	GeneID:12930652	GeneID:945168	KEGG:ecj:Y75_p2459	KEGG:eco:b2506	PATRIC:32120403	EchoBASE:EB3957	EcoGene:EG14205	eggNOG:NOG11897	HOGENOM:HOG000123074	OMA:QMELENM	OrthoDB:EOG6VTK4D	ProtClustDB:CLSK880415	BioCyc:EcoCyc:G7317-MONOMER	BioCyc:ECOL316407:JW2490-MONOMER	PRO:PR:P76573	Genevestigator:P76573	GO:GO:0006974	InterPro:IPR020231	ProDom:PD095266
10686_638657219	P76573	EMBL:U00096	EMBL:AP009048	PIR:A65027	RefSeq:NP_417001.1	RefSeq:YP_490734.1	ProteinModelPortal:P76573	DIP:DIP-12040N	IntAct:P76573	STRING:511145.b2506	PRIDE:P76573	EnsemblBacteria:AAC75559	EnsemblBacteria:BAE76727	GeneID:12930652	GeneID:945168	KEGG:ecj:Y75_p2459	KEGG:eco:b2506	PATRIC:32120403	EchoBASE:EB3957	EcoGene:EG14205	eggNOG:NOG11897	HOGENOM:HOG000123074	OMA:QMELENM	OrthoDB:EOG6VTK4D	ProtClustDB:CLSK880415	BioCyc:EcoCyc:G7317-MONOMER	BioCyc:ECOL316407:JW2490-MONOMER	PRO:PR:P76573	Genevestigator:P76573	GO:GO:0006974	InterPro:IPR020231	ProDom:PD095266
10787_644522456	Q81H98	EMBL:AE016877	RefSeq:NP_830707.1	STRING:226900.BC0921	EnsemblBacteria:AAP07908	GeneID:1203270	KEGG:bce:BC0921	PATRIC:32597514	OMA:ICGLEIR	OrthoDB:EOG6B62C3	ProtClustDB:CLSK916018	BioCyc:BCER226900:GJEU-921-MONOMER
10787_644533647	Q81H98	EMBL:AE016877	RefSeq:NP_830707.1	STRING:226900.BC0921	EnsemblBacteria:AAP07908	GeneID:1203270	KEGG:bce:BC0921	PATRIC:32597514	OMA:ICGLEIR	OrthoDB:EOG6B62C3	ProtClustDB:CLSK916018	BioCyc:BCER226900:GJEU-921-MONOMER
13635_645345908	P42591	EMBL:U18997	EMBL:U00096	EMBL:AP009048	PIR:D65096	RefSeq:NP_417550.1	RefSeq:YP_491270.1	ProteinModelPortal:P42591	STRING:511145.b3079	EnsemblBacteria:AAC76114	EnsemblBacteria:BAE77129	GeneID:12930271	GeneID:947597	KEGG:ecj:Y75_p3004	KEGG:eco:b3079	PATRIC:32121574	EchoBASE:EB2580	EcoGene:EG12721	eggNOG:NOG87024	HOGENOM:HOG000125126	OMA:GYIQYDI	OrthoDB:EOG686NDT	ProtClustDB:CLSK880571	BioCyc:EcoCyc:G7598-MONOMER	BioCyc:ECOL316407:JW3050-MONOMER	PRO:PR:P42591	Genevestigator:P42591
13635_645351325	P42591	EMBL:U18997	EMBL:U00096	EMBL:AP009048	PIR:D65096	RefSeq:NP_417550.1	RefSeq:YP_491270.1	ProteinModelPortal:P42591	STRING:511145.b3079	EnsemblBacteria:AAC76114	EnsemblBacteria:BAE77129	GeneID:12930271	GeneID:947597	KEGG:ecj:Y75_p3004	KEGG:eco:b3079	PATRIC:32121574	EchoBASE:EB2580	EcoGene:EG12721	eggNOG:NOG87024	HOGENOM:HOG000125126	OMA:GYIQYDI	OrthoDB:EOG686NDT	ProtClustDB:CLSK880571	BioCyc:EcoCyc:G7598-MONOMER	BioCyc:ECOL316407:JW3050-MONOMER	PRO:PR:P42591	Genevestigator:P42591
13635_637003025	P42591	EMBL:U18997	EMBL:U00096	EMBL:AP009048	PIR:D65096	RefSeq:NP_417550.1	RefSeq:YP_491270.1	ProteinModelPortal:P42591	STRING:511145.b3079	EnsemblBacteria:AAC76114	EnsemblBacteria:BAE77129	GeneID:12930271	GeneID:947597	KEGG:ecj:Y75_p3004	KEGG:eco:b3079	PATRIC:32121574	EchoBASE:EB2580	EcoGene:EG12721	eggNOG:NOG87024	HOGENOM:HOG000125126	OMA:GYIQYDI	OrthoDB:EOG686NDT	ProtClustDB:CLSK880571	BioCyc:EcoCyc:G7598-MONOMER	BioCyc:ECOL316407:JW3050-MONOMER	PRO:PR:P42591	Genevestigator:P42591
13635_638693446	P42591	EMBL:U18997	EMBL:U00096	EMBL:AP009048	PIR:D65096	RefSeq:NP_417550.1	RefSeq:YP_491270.1	ProteinModelPortal:P42591	STRING:511145.b3079	EnsemblBacteria:AAC76114	EnsemblBacteria:BAE77129	GeneID:12930271	GeneID:947597	KEGG:ecj:Y75_p3004	KEGG:eco:b3079	PATRIC:32121574	EchoBASE:EB2580	EcoGene:EG12721	eggNOG:NOG87024	HOGENOM:HOG000125126	OMA:GYIQYDI	OrthoDB:EOG686NDT	ProtClustDB:CLSK880571	BioCyc:EcoCyc:G7598-MONOMER	BioCyc:ECOL316407:JW3050-MONOMER	PRO:PR:P42591	Genevestigator:P42591
13635_638664174	P42591	EMBL:U18997	EMBL:U00096	EMBL:AP009048	PIR:D65096	RefSeq:NP_417550.1	RefSeq:YP_491270.1	ProteinModelPortal:P42591	STRING:511145.b3079	EnsemblBacteria:AAC76114	EnsemblBacteria:BAE77129	GeneID:12930271	GeneID:947597	KEGG:ecj:Y75_p3004	KEGG:eco:b3079	PATRIC:32121574	EchoBASE:EB2580	EcoGene:EG12721	eggNOG:NOG87024	HOGENOM:HOG000125126	OMA:GYIQYDI	OrthoDB:EOG686NDT	ProtClustDB:CLSK880571	BioCyc:EcoCyc:G7598-MONOMER	BioCyc:ECOL316407:JW3050-MONOMER	PRO:PR:P42591	Genevestigator:P42591
13635_638869039	P42591	EMBL:U18997	EMBL:U00096	EMBL:AP009048	PIR:D65096	RefSeq:NP_417550.1	RefSeq:YP_491270.1	ProteinModelPortal:P42591	STRING:511145.b3079	EnsemblBacteria:AAC76114	EnsemblBacteria:BAE77129	GeneID:12930271	GeneID:947597	KEGG:ecj:Y75_p3004	KEGG:eco:b3079	PATRIC:32121574	EchoBASE:EB2580	EcoGene:EG12721	eggNOG:NOG87024	HOGENOM:HOG000125126	OMA:GYIQYDI	OrthoDB:EOG686NDT	ProtClustDB:CLSK880571	BioCyc:EcoCyc:G7598-MONOMER	BioCyc:ECOL316407:JW3050-MONOMER	PRO:PR:P42591	Genevestigator:P42591
13635_638675107	P42591	EMBL:U18997	EMBL:U00096	EMBL:AP009048	PIR:D65096	RefSeq:NP_417550.1	RefSeq:YP_491270.1	ProteinModelPortal:P42591	STRING:511145.b3079	EnsemblBacteria:AAC76114	EnsemblBacteria:BAE77129	GeneID:12930271	GeneID:947597	KEGG:ecj:Y75_p3004	KEGG:eco:b3079	PATRIC:32121574	EchoBASE:EB2580	EcoGene:EG12721	eggNOG:NOG87024	HOGENOM:HOG000125126	OMA:GYIQYDI	OrthoDB:EOG686NDT	ProtClustDB:CLSK880571	BioCyc:EcoCyc:G7598-MONOMER	BioCyc:ECOL316407:JW3050-MONOMER	PRO:PR:P42591	Genevestigator:P42591
14297_637000287	P77694	EMBL:U73857	EMBL:U00096	EMBL:AP009048	PIR:B64755	RefSeq:NP_414824.1	RefSeq:YP_488586.1	PDB:3QS3	PDBsum:3QS3	ProteinModelPortal:P77694	DIP:DIP-11249N	IntAct:P77694	MINT:MINT-1311089	STRING:511145.b0290	EnsemblBacteria:AAC73393	EnsemblBacteria:BAE76074	GeneID:12932575	GeneID:947349	KEGG:ecj:Y75_p0282	KEGG:eco:b0290	PATRIC:32115703	EchoBASE:EB3332	EcoGene:EG13562	eggNOG:NOG115334	HOGENOM:HOG000269468	OMA:SRAGLSC	OrthoDB:EOG63VBVT	ProtClustDB:CLSK879616	BioCyc:EcoCyc:G6161-MONOMER	BioCyc:ECOL316407:JW0284-MONOMER	PRO:PR:P77694	Genevestigator:P77694
15137_637002056	P76406	EMBL:U00096	EMBL:AP009048	PIR:D64975	RefSeq:NP_416589.2	RefSeq:YP_490325.1	ProteinModelPortal:P76406	STRING:511145.b2085	PaxDb:P76406	EnsemblBacteria:AAC75146	EnsemblBacteria:BAE76582	GeneID:12932763	GeneID:946613	KEGG:ecj:Y75_p2047	KEGG:eco:b2085	PATRIC:32119503	EchoBASE:EB3814	EcoGene:EG14061	eggNOG:NOG73379	HOGENOM:HOG000122099	OMA:NTRACRW	OrthoDB:EOG60W7W1	ProtClustDB:CLSK880285	BioCyc:EcoCyc:G7122-MONOMER	BioCyc:ECOL316407:JW5837-MONOMER	PRO:PR:P76406	Genevestigator:P76406
15680_643908851	P96502	EMBL:U56901	EMBL:AL009126	PIR:B70042	RefSeq:NP_391419.1	ProteinModelPortal:P96502	STRING:224308.BSU35390	PaxDb:P96502	EnsemblBacteria:CAB15556	GeneID:936735	KEGG:bsu:BSU35390	PATRIC:18979086	GenoList:BSU35390	eggNOG:NOG09637	HOGENOM:HOG000245690	OMA:MEGIART	OrthoDB:EOG6TBHGM	ProtClustDB:CLSK887955	BioCyc:BSUB:BSU35390-MONOMER
15680_643904450	P96502	EMBL:U56901	EMBL:AL009126	PIR:B70042	RefSeq:NP_391419.1	ProteinModelPortal:P96502	STRING:224308.BSU35390	PaxDb:P96502	EnsemblBacteria:CAB15556	GeneID:936735	KEGG:bsu:BSU35390	PATRIC:18979086	GenoList:BSU35390	eggNOG:NOG09637	HOGENOM:HOG000245690	OMA:MEGIART	OrthoDB:EOG6TBHGM	ProtClustDB:CLSK887955	BioCyc:BSUB:BSU35390-MONOMER
15680_643899926	P96502	EMBL:U56901	EMBL:AL009126	PIR:B70042	RefSeq:NP_391419.1	ProteinModelPortal:P96502	STRING:224308.BSU35390	PaxDb:P96502	EnsemblBacteria:CAB15556	GeneID:936735	KEGG:bsu:BSU35390	PATRIC:18979086	GenoList:BSU35390	eggNOG:NOG09637	HOGENOM:HOG000245690	OMA:MEGIART	OrthoDB:EOG6TBHGM	ProtClustDB:CLSK887955	BioCyc:BSUB:BSU35390-MONOMER
15680_643895526	P96502	EMBL:U56901	EMBL:AL009126	PIR:B70042	RefSeq:NP_391419.1	ProteinModelPortal:P96502	STRING:224308.BSU35390	PaxDb:P96502	EnsemblBacteria:CAB15556	GeneID:936735	KEGG:bsu:BSU35390	PATRIC:18979086	GenoList:BSU35390	eggNOG:NOG09637	HOGENOM:HOG000245690	OMA:MEGIART	OrthoDB:EOG6TBHGM	ProtClustDB:CLSK887955	BioCyc:BSUB:BSU35390-MONOMER
18179_639296054	O34167	EMBL:U95165	EMBL:AE007869	PIR:AH2645	PIR:H97427	RefSeq:NP_353592.1	STRING:176299.Atu0565	EnsemblBacteria:AAK86377	GeneID:1132603	KEGG:atu:Atu0565	PATRIC:20810833	eggNOG:NOG07016	HOGENOM:HOG000226673	OMA:VLDLEIK	OrthoDB:EOG6GR39R	ProtClustDB:CLSK863601	InterPro:IPR017024	PIRSF:PIRSF034217
19916_637002332	P76512	EMBL:U00096	EMBL:AP009048	PIR:D65009	RefSeq:NP_416860.4	RefSeq:YP_490599.1	ProteinModelPortal:P76512	DIP:DIP-12004N	IntAct:P76512	STRING:511145.b2359	EnsemblBacteria:AAC75418	EnsemblBacteria:BAE76698	GeneID:12931553	GeneID:945565	KEGG:ecj:Y75_p2324	KEGG:eco:b2359	PATRIC:32120095	EcoGene:EG14138	eggNOG:NOG38819	HOGENOM:HOG000123914	OMA:DRKTNVP	OrthoDB:EOG6XDGVP	ProtClustDB:CLSK721137	BioCyc:EcoCyc:G7228-MONOMER	BioCyc:ECOL316407:JW2356-MONOMER	PRO:PR:P76512	Genevestigator:P76512
26928_640685432	P43998	EMBL:L42023	PIR:G64007	RefSeq:NP_438612.1	STRING:71421.HI0451	EnsemblBacteria:AAC22109	GeneID:950826	KEGG:hin:HI0451	PATRIC:20189457	eggNOG:bactNOG53912	OMA:WIENKIA	OrthoDB:EOG6HF65F	ProtClustDB:CLSK782042
26928_638422440	P43998	EMBL:L42023	PIR:G64007	RefSeq:NP_438612.1	STRING:71421.HI0451	EnsemblBacteria:AAC22109	GeneID:950826	KEGG:hin:HI0451	PATRIC:20189457	eggNOG:bactNOG53912	OMA:WIENKIA	OrthoDB:EOG6HF65F	ProtClustDB:CLSK782042
26928_640675277	P43998	EMBL:L42023	PIR:G64007	RefSeq:NP_438612.1	STRING:71421.HI0451	EnsemblBacteria:AAC22109	GeneID:950826	KEGG:hin:HI0451	PATRIC:20189457	eggNOG:bactNOG53912	OMA:WIENKIA	OrthoDB:EOG6HF65F	ProtClustDB:CLSK782042
26928_645196407	P43998	EMBL:L42023	PIR:G64007	RefSeq:NP_438612.1	STRING:71421.HI0451	EnsemblBacteria:AAC22109	GeneID:950826	KEGG:hin:HI0451	PATRIC:20189457	eggNOG:bactNOG53912	OMA:WIENKIA	OrthoDB:EOG6HF65F	ProtClustDB:CLSK782042
26928_640679511	P43998	EMBL:L42023	PIR:G64007	RefSeq:NP_438612.1	STRING:71421.HI0451	EnsemblBacteria:AAC22109	GeneID:950826	KEGG:hin:HI0451	PATRIC:20189457	eggNOG:bactNOG53912	OMA:WIENKIA	OrthoDB:EOG6HF65F	ProtClustDB:CLSK782042
26928_640683606	P43998	EMBL:L42023	PIR:G64007	RefSeq:NP_438612.1	STRING:71421.HI0451	EnsemblBacteria:AAC22109	GeneID:950826	KEGG:hin:HI0451	PATRIC:20189457	eggNOG:bactNOG53912	OMA:WIENKIA	OrthoDB:EOG6HF65F	ProtClustDB:CLSK782042
26928_645194830	P43998	EMBL:L42023	PIR:G64007	RefSeq:NP_438612.1	STRING:71421.HI0451	EnsemblBacteria:AAC22109	GeneID:950826	KEGG:hin:HI0451	PATRIC:20189457	eggNOG:bactNOG53912	OMA:WIENKIA	OrthoDB:EOG6HF65F	ProtClustDB:CLSK782042
26928_640677644	P43998	EMBL:L42023	PIR:G64007	RefSeq:NP_438612.1	STRING:71421.HI0451	EnsemblBacteria:AAC22109	GeneID:950826	KEGG:hin:HI0451	PATRIC:20189457	eggNOG:bactNOG53912	OMA:WIENKIA	OrthoDB:EOG6HF65F	ProtClustDB:CLSK782042
26928_640673709	P43998	EMBL:L42023	PIR:G64007	RefSeq:NP_438612.1	STRING:71421.HI0451	EnsemblBacteria:AAC22109	GeneID:950826	KEGG:hin:HI0451	PATRIC:20189457	eggNOG:bactNOG53912	OMA:WIENKIA	OrthoDB:EOG6HF65F	ProtClustDB:CLSK782042
26928_638419728	P43998	EMBL:L42023	PIR:G64007	RefSeq:NP_438612.1	STRING:71421.HI0451	EnsemblBacteria:AAC22109	GeneID:950826	KEGG:hin:HI0451	PATRIC:20189457	eggNOG:bactNOG53912	OMA:WIENKIA	OrthoDB:EOG6HF65F	ProtClustDB:CLSK782042
29782_645077836	Q9RN22	EMBL:AF188935	EMBL:AE011191	EMBL:AE017335	RefSeq:NP_053165.1	RefSeq:NP_652979.1	RefSeq:YP_016519.2	STRING:261594.GBAA_pXO2_0009	TCDB:3.A.7.13.1	EnsemblBacteria:AAT28939	GeneID:1158787	GeneID:2820372	GeneID:3361829	KEGG:bar:GBAA_pXO2_0009	PATRIC:24662244	eggNOG:NOG137908	HOGENOM:HOG000034620	OMA:ETHALNT	OrthoDB:EOG6M6JMG	ProtClustDB:CLSK687666	BioCyc:ANTHRA:GBAA_PXO2_0009-MONOMER	BioCyc:BANT261594:GJ7F-5804-MONOMER
29782_642370516	Q9RN22	EMBL:AF188935	EMBL:AE011191	EMBL:AE017335	RefSeq:NP_053165.1	RefSeq:NP_652979.1	RefSeq:YP_016519.2	STRING:261594.GBAA_pXO2_0009	TCDB:3.A.7.13.1	EnsemblBacteria:AAT28939	GeneID:1158787	GeneID:2820372	GeneID:3361829	KEGG:bar:GBAA_pXO2_0009	PATRIC:24662244	eggNOG:NOG137908	HOGENOM:HOG000034620	OMA:ETHALNT	OrthoDB:EOG6M6JMG	ProtClustDB:CLSK687666	BioCyc:ANTHRA:GBAA_PXO2_0009-MONOMER	BioCyc:BANT261594:GJ7F-5804-MONOMER
29782_645101624	Q9RN22	EMBL:AF188935	EMBL:AE011191	EMBL:AE017335	RefSeq:NP_053165.1	RefSeq:NP_652979.1	RefSeq:YP_016519.2	STRING:261594.GBAA_pXO2_0009	TCDB:3.A.7.13.1	EnsemblBacteria:AAT28939	GeneID:1158787	GeneID:2820372	GeneID:3361829	KEGG:bar:GBAA_pXO2_0009	PATRIC:24662244	eggNOG:NOG137908	HOGENOM:HOG000034620	OMA:ETHALNT	OrthoDB:EOG6M6JMG	ProtClustDB:CLSK687666	BioCyc:ANTHRA:GBAA_PXO2_0009-MONOMER	BioCyc:BANT261594:GJ7F-5804-MONOMER
29782_645072080	Q9RN22	EMBL:AF188935	EMBL:AE011191	EMBL:AE017335	RefSeq:NP_053165.1	RefSeq:NP_652979.1	RefSeq:YP_016519.2	STRING:261594.GBAA_pXO2_0009	TCDB:3.A.7.13.1	EnsemblBacteria:AAT28939	GeneID:1158787	GeneID:2820372	GeneID:3361829	KEGG:bar:GBAA_pXO2_0009	PATRIC:24662244	eggNOG:NOG137908	HOGENOM:HOG000034620	OMA:ETHALNT	OrthoDB:EOG6M6JMG	ProtClustDB:CLSK687666	BioCyc:ANTHRA:GBAA_PXO2_0009-MONOMER	BioCyc:BANT261594:GJ7F-5804-MONOMER
29782_642413802	Q9RN22	EMBL:AF188935	EMBL:AE011191	EMBL:AE017335	RefSeq:NP_053165.1	RefSeq:NP_652979.1	RefSeq:YP_016519.2	STRING:261594.GBAA_pXO2_0009	TCDB:3.A.7.13.1	EnsemblBacteria:AAT28939	GeneID:1158787	GeneID:2820372	GeneID:3361829	KEGG:bar:GBAA_pXO2_0009	PATRIC:24662244	eggNOG:NOG137908	HOGENOM:HOG000034620	OMA:ETHALNT	OrthoDB:EOG6M6JMG	ProtClustDB:CLSK687666	BioCyc:ANTHRA:GBAA_PXO2_0009-MONOMER	BioCyc:BANT261594:GJ7F-5804-MONOMER
29782_642079570	Q9RN22	EMBL:AF188935	EMBL:AE011191	EMBL:AE017335	RefSeq:NP_053165.1	RefSeq:NP_652979.1	RefSeq:YP_016519.2	STRING:261594.GBAA_pXO2_0009	TCDB:3.A.7.13.1	EnsemblBacteria:AAT28939	GeneID:1158787	GeneID:2820372	GeneID:3361829	KEGG:bar:GBAA_pXO2_0009	PATRIC:24662244	eggNOG:NOG137908	HOGENOM:HOG000034620	OMA:ETHALNT	OrthoDB:EOG6M6JMG	ProtClustDB:CLSK687666	BioCyc:ANTHRA:GBAA_PXO2_0009-MONOMER	BioCyc:BANT261594:GJ7F-5804-MONOMER
29782_642375853	Q9RN22	EMBL:AF188935	EMBL:AE011191	EMBL:AE017335	RefSeq:NP_053165.1	RefSeq:NP_652979.1	RefSeq:YP_016519.2	STRING:261594.GBAA_pXO2_0009	TCDB:3.A.7.13.1	EnsemblBacteria:AAT28939	GeneID:1158787	GeneID:2820372	GeneID:3361829	KEGG:bar:GBAA_pXO2_0009	PATRIC:24662244	eggNOG:NOG137908	HOGENOM:HOG000034620	OMA:ETHALNT	OrthoDB:EOG6M6JMG	ProtClustDB:CLSK687666	BioCyc:ANTHRA:GBAA_PXO2_0009-MONOMER	BioCyc:BANT261594:GJ7F-5804-MONOMER
29782_642432990	Q9RN22	EMBL:AF188935	EMBL:AE011191	EMBL:AE017335	RefSeq:NP_053165.1	RefSeq:NP_652979.1	RefSeq:YP_016519.2	STRING:261594.GBAA_pXO2_0009	TCDB:3.A.7.13.1	EnsemblBacteria:AAT28939	GeneID:1158787	GeneID:2820372	GeneID:3361829	KEGG:bar:GBAA_pXO2_0009	PATRIC:24662244	eggNOG:NOG137908	HOGENOM:HOG000034620	OMA:ETHALNT	OrthoDB:EOG6M6JMG	ProtClustDB:CLSK687666	BioCyc:ANTHRA:GBAA_PXO2_0009-MONOMER	BioCyc:BANT261594:GJ7F-5804-MONOMER
29782_645095615	Q9RN22	EMBL:AF188935	EMBL:AE011191	EMBL:AE017335	RefSeq:NP_053165.1	RefSeq:NP_652979.1	RefSeq:YP_016519.2	STRING:261594.GBAA_pXO2_0009	TCDB:3.A.7.13.1	EnsemblBacteria:AAT28939	GeneID:1158787	GeneID:2820372	GeneID:3361829	KEGG:bar:GBAA_pXO2_0009	PATRIC:24662244	eggNOG:NOG137908	HOGENOM:HOG000034620	OMA:ETHALNT	OrthoDB:EOG6M6JMG	ProtClustDB:CLSK687666	BioCyc:ANTHRA:GBAA_PXO2_0009-MONOMER	BioCyc:BANT261594:GJ7F-5804-MONOMER
29782_645083822	Q9RN22	EMBL:AF188935	EMBL:AE011191	EMBL:AE017335	RefSeq:NP_053165.1	RefSeq:NP_652979.1	RefSeq:YP_016519.2	STRING:261594.GBAA_pXO2_0009	TCDB:3.A.7.13.1	EnsemblBacteria:AAT28939	GeneID:1158787	GeneID:2820372	GeneID:3361829	KEGG:bar:GBAA_pXO2_0009	PATRIC:24662244	eggNOG:NOG137908	HOGENOM:HOG000034620	OMA:ETHALNT	OrthoDB:EOG6M6JMG	ProtClustDB:CLSK687666	BioCyc:ANTHRA:GBAA_PXO2_0009-MONOMER	BioCyc:BANT261594:GJ7F-5804-MONOMER
29782_642340977	Q9RN22	EMBL:AF188935	EMBL:AE011191	EMBL:AE017335	RefSeq:NP_053165.1	RefSeq:NP_652979.1	RefSeq:YP_016519.2	STRING:261594.GBAA_pXO2_0009	TCDB:3.A.7.13.1	EnsemblBacteria:AAT28939	GeneID:1158787	GeneID:2820372	GeneID:3361829	KEGG:bar:GBAA_pXO2_0009	PATRIC:24662244	eggNOG:NOG137908	HOGENOM:HOG000034620	OMA:ETHALNT	OrthoDB:EOG6M6JMG	ProtClustDB:CLSK687666	BioCyc:ANTHRA:GBAA_PXO2_0009-MONOMER	BioCyc:BANT261594:GJ7F-5804-MONOMER
29782_645089673	Q9RN22	EMBL:AF188935	EMBL:AE011191	EMBL:AE017335	RefSeq:NP_053165.1	RefSeq:NP_652979.1	RefSeq:YP_016519.2	STRING:261594.GBAA_pXO2_0009	TCDB:3.A.7.13.1	EnsemblBacteria:AAT28939	GeneID:1158787	GeneID:2820372	GeneID:3361829	KEGG:bar:GBAA_pXO2_0009	PATRIC:24662244	eggNOG:NOG137908	HOGENOM:HOG000034620	OMA:ETHALNT	OrthoDB:EOG6M6JMG	ProtClustDB:CLSK687666	BioCyc:ANTHRA:GBAA_PXO2_0009-MONOMER	BioCyc:BANT261594:GJ7F-5804-MONOMER
30689_637002601	P52135	EMBL:U36840	EMBL:U00096	EMBL:AP009048	EMBL:M59434	PIR:T08648	RefSeq:NP_417125.1	RefSeq:YP_490858.1	ProteinModelPortal:P52135	STRING:511145.b2637	PRIDE:P52135	EnsemblBacteria:AAC75685	EnsemblBacteria:BAE76772	GeneID:12931635	GeneID:947616	KEGG:ecj:Y75_p2583	KEGG:eco:b2637	PATRIC:32120665	EchoBASE:EB2998	EcoGene:EG13206	eggNOG:NOG119130	HOGENOM:HOG000001687	OMA:DNAWVSF	OrthoDB:EOG6RVFWV	ProtClustDB:CLSK891705	BioCyc:EcoCyc:G7372-MONOMER	BioCyc:ECOL316407:JW2618-MONOMER	PRO:PR:P52135	Genevestigator:P52135
30689_637000246	P77162	EMBL:U70214	EMBL:U00096	EMBL:AP009048	PIR:B64750	RefSeq:NP_414784.1	RefSeq:YP_488545.1	ProteinModelPortal:P77162	STRING:511145.b0250	EnsemblBacteria:AAC73353	EnsemblBacteria:BAA77919	GeneID:12934177	GeneID:946846	KEGG:ecj:Y75_p0241	KEGG:eco:b0250	PATRIC:32115617	EchoBASE:EB3318	EcoGene:EG13548	HOGENOM:HOG000001687	OrthoDB:EOG6RVFWV	ProtClustDB:CLSK891705	BioCyc:EcoCyc:G6125-MONOMER	BioCyc:ECOL316407:JW0239-MONOMER	PRO:PR:P77162	Genevestigator:P77162
35710_643895268	C0H3R1	EMBL:AL009126	RefSeq:YP_003097784.1	STRING:224308.BSU32859	EnsemblBacteria:CAX52690	GeneID:8302981	KEGG:bsu:BSU32859	PATRIC:18978554	GenoList:BSU32859	eggNOG:NOG86162	HOGENOM:HOG000262167	OrthoDB:EOG64XXS2	ProtClustDB:CLSK2463222	BioCyc:BSUB:BSU32859-MONOMER
35710_643899668	C0H3R1	EMBL:AL009126	RefSeq:YP_003097784.1	STRING:224308.BSU32859	EnsemblBacteria:CAX52690	GeneID:8302981	KEGG:bsu:BSU32859	PATRIC:18978554	GenoList:BSU32859	eggNOG:NOG86162	HOGENOM:HOG000262167	OrthoDB:EOG64XXS2	ProtClustDB:CLSK2463222	BioCyc:BSUB:BSU32859-MONOMER
35710_643904192	C0H3R1	EMBL:AL009126	RefSeq:YP_003097784.1	STRING:224308.BSU32859	EnsemblBacteria:CAX52690	GeneID:8302981	KEGG:bsu:BSU32859	PATRIC:18978554	GenoList:BSU32859	eggNOG:NOG86162	HOGENOM:HOG000262167	OrthoDB:EOG64XXS2	ProtClustDB:CLSK2463222	BioCyc:BSUB:BSU32859-MONOMER
35710_643908592	C0H3R1	EMBL:AL009126	RefSeq:YP_003097784.1	STRING:224308.BSU32859	EnsemblBacteria:CAX52690	GeneID:8302981	KEGG:bsu:BSU32859	PATRIC:18978554	GenoList:BSU32859	eggNOG:NOG86162	HOGENOM:HOG000262167	OrthoDB:EOG64XXS2	ProtClustDB:CLSK2463222	BioCyc:BSUB:BSU32859-MONOMER
39028_642176946	Q8ZPA6	EMBL:AE006468	EnsemblBacteria:AAL20547	OMA:CASGCKE	GO:GO:0030430	GO:GO:0009405
39028_642170541	Q8ZPA6	EMBL:AE006468	EnsemblBacteria:AAL20547	OMA:CASGCKE	GO:GO:0030430	GO:GO:0009405
39028_641873429	Q8ZPA6	EMBL:AE006468	EnsemblBacteria:AAL20547	OMA:CASGCKE	GO:GO:0030430	GO:GO:0009405
39028_641869263	Q8ZPA6	EMBL:AE006468	EnsemblBacteria:AAL20547	OMA:CASGCKE	GO:GO:0030430	GO:GO:0009405
39028_642155994	Q8ZPA6	EMBL:AE006468	EnsemblBacteria:AAL20547	OMA:CASGCKE	GO:GO:0030430	GO:GO:0009405
39028_641881097	Q8ZPA6	EMBL:AE006468	EnsemblBacteria:AAL20547	OMA:CASGCKE	GO:GO:0030430	GO:GO:0009405
56941_641860407	P05839	EMBL:M13492	PIR:A24466	RefSeq:YP_006903452.1	GeneID:13903397	InterPro:IPR016389	PIRSF:PIRSF003281
65458_645461044	Q9KVG7	EMBL:AE003852	PIR:F82354	RefSeq:NP_229836.1	STRING:243277.VC0179	DNASU:2614190	GeneID:2614190	KEGG:vch:VC0179	PATRIC:20079408	OMA:CIRIEIA	OrthoDB:EOG6ZPSW3	ProtClustDB:CLSK695883	BioCyc:VCHO:VC0179-MONOMER	GO:GO:0005524	GO:GO:0061501	GO:GO:0052621	GO:GO:0005525	GO:GO:0009190	GO:GO:0050922	GO:GO:0009405
65458_645452923	Q9KVG7	EMBL:AE003852	PIR:F82354	RefSeq:NP_229836.1	STRING:243277.VC0179	DNASU:2614190	GeneID:2614190	KEGG:vch:VC0179	PATRIC:20079408	OMA:CIRIEIA	OrthoDB:EOG6ZPSW3	ProtClustDB:CLSK695883	BioCyc:VCHO:VC0179-MONOMER	GO:GO:0005524	GO:GO:0061501	GO:GO:0052621	GO:GO:0005525	GO:GO:0009190	GO:GO:0050922	GO:GO:0009405
65458_638699430	Q9KVG7	EMBL:AE003852	PIR:F82354	RefSeq:NP_229836.1	STRING:243277.VC0179	DNASU:2614190	GeneID:2614190	KEGG:vch:VC0179	PATRIC:20079408	OMA:CIRIEIA	OrthoDB:EOG6ZPSW3	ProtClustDB:CLSK695883	BioCyc:VCHO:VC0179-MONOMER	GO:GO:0005524	GO:GO:0061501	GO:GO:0052621	GO:GO:0005525	GO:GO:0009190	GO:GO:0050922	GO:GO:0009405
65458_645638067	Q9KVG7	EMBL:AE003852	PIR:F82354	RefSeq:NP_229836.1	STRING:243277.VC0179	DNASU:2614190	GeneID:2614190	KEGG:vch:VC0179	PATRIC:20079408	OMA:CIRIEIA	OrthoDB:EOG6ZPSW3	ProtClustDB:CLSK695883	BioCyc:VCHO:VC0179-MONOMER	GO:GO:0005524	GO:GO:0061501	GO:GO:0052621	GO:GO:0005525	GO:GO:0009190	GO:GO:0050922	GO:GO:0009405
95010_643907344	O31953	EMBL:AL009126	RefSeq:NP_389995.1	ProteinModelPortal:O31953	STRING:224308.BSU21120	PaxDb:O31953	EnsemblBacteria:CAB14030	GeneID:939162	KEGG:bsu:BSU21120	PATRIC:18976039	GenoList:BSU21120	eggNOG:NOG291557	BioCyc:BSUB:BSU21120-MONOMER
95010_643902952	O31953	EMBL:AL009126	RefSeq:NP_389995.1	ProteinModelPortal:O31953	STRING:224308.BSU21120	PaxDb:O31953	EnsemblBacteria:CAB14030	GeneID:939162	KEGG:bsu:BSU21120	PATRIC:18976039	GenoList:BSU21120	eggNOG:NOG291557	BioCyc:BSUB:BSU21120-MONOMER
95010_643894027	O31953	EMBL:AL009126	RefSeq:NP_389995.1	ProteinModelPortal:O31953	STRING:224308.BSU21120	PaxDb:O31953	EnsemblBacteria:CAB14030	GeneID:939162	KEGG:bsu:BSU21120	PATRIC:18976039	GenoList:BSU21120	eggNOG:NOG291557	BioCyc:BSUB:BSU21120-MONOMER
95010_643898422	O31953	EMBL:AL009126	RefSeq:NP_389995.1	ProteinModelPortal:O31953	STRING:224308.BSU21120	PaxDb:O31953	EnsemblBacteria:CAB14030	GeneID:939162	KEGG:bsu:BSU21120	PATRIC:18976039	GenoList:BSU21120	eggNOG:NOG291557	BioCyc:BSUB:BSU21120-MONOMER
94068_640737962	P76069	EMBL:U00096	EMBL:AP009048	PIR:A64887	RefSeq:YP_489637.1	ProteinModelPortal:P76069	DIP:DIP-11630N	IntAct:P76069	MINT:MINT-1275440	STRING:316407.ydaY	PRIDE:P76069	EnsemblBacteria:BAE76418	GeneID:12931173	KEGG:ecj:Y75_p1344	PATRIC:48662023	EchoBASE:EB3150	EcoGene:EG13367	eggNOG:NOG140638	HOGENOM:HOG000120431	OMA:LLIDNCA	BioCyc:EcoCyc:G6689-MONOMER	BioCyc:ECOL316407:JW1360-MONOMER	Genevestigator:P76069
92236_643894031	O31957	EMBL:AL009126	RefSeq:NP_389999.1	ProteinModelPortal:O31957	STRING:224308.BSU21160	PaxDb:O31957	EnsemblBacteria:CAB14034	GeneID:939158	KEGG:bsu:BSU21160	PATRIC:18976047	GenoList:BSU21160	BioCyc:BSUB:BSU21160-MONOMER
92236_643902956	O31957	EMBL:AL009126	RefSeq:NP_389999.1	ProteinModelPortal:O31957	STRING:224308.BSU21160	PaxDb:O31957	EnsemblBacteria:CAB14034	GeneID:939158	KEGG:bsu:BSU21160	PATRIC:18976047	GenoList:BSU21160	BioCyc:BSUB:BSU21160-MONOMER
92236_643898426	O31957	EMBL:AL009126	RefSeq:NP_389999.1	ProteinModelPortal:O31957	STRING:224308.BSU21160	PaxDb:O31957	EnsemblBacteria:CAB14034	GeneID:939158	KEGG:bsu:BSU21160	PATRIC:18976047	GenoList:BSU21160	BioCyc:BSUB:BSU21160-MONOMER
92236_643907348	O31957	EMBL:AL009126	RefSeq:NP_389999.1	ProteinModelPortal:O31957	STRING:224308.BSU21160	PaxDb:O31957	EnsemblBacteria:CAB14034	GeneID:939158	KEGG:bsu:BSU21160	PATRIC:18976047	GenoList:BSU21160	BioCyc:BSUB:BSU21160-MONOMER
91063_643907346	O31955	EMBL:AL009126	RefSeq:NP_389997.1	ProteinModelPortal:O31955	STRING:224308.BSU21140	PaxDb:O31955	EnsemblBacteria:CAB14032	GeneID:939157	KEGG:bsu:BSU21140	PATRIC:18976043	GenoList:BSU21140	BioCyc:BSUB:BSU21140-MONOMER
91063_643902954	O31955	EMBL:AL009126	RefSeq:NP_389997.1	ProteinModelPortal:O31955	STRING:224308.BSU21140	PaxDb:O31955	EnsemblBacteria:CAB14032	GeneID:939157	KEGG:bsu:BSU21140	PATRIC:18976043	GenoList:BSU21140	BioCyc:BSUB:BSU21140-MONOMER
91063_643894029	O31955	EMBL:AL009126	RefSeq:NP_389997.1	ProteinModelPortal:O31955	STRING:224308.BSU21140	PaxDb:O31955	EnsemblBacteria:CAB14032	GeneID:939157	KEGG:bsu:BSU21140	PATRIC:18976043	GenoList:BSU21140	BioCyc:BSUB:BSU21140-MONOMER
91063_643898424	O31955	EMBL:AL009126	RefSeq:NP_389997.1	ProteinModelPortal:O31955	STRING:224308.BSU21140	PaxDb:O31955	EnsemblBacteria:CAB14032	GeneID:939157	KEGG:bsu:BSU21140	PATRIC:18976043	GenoList:BSU21140	BioCyc:BSUB:BSU21140-MONOMER
88783_643898427	O31958	EMBL:AL009126	RefSeq:NP_390000.1	STRING:224308.BSU21170	PaxDb:O31958	EnsemblBacteria:CAB14035	GeneID:939156	KEGG:bsu:BSU21170	GenoList:BSU21170	BioCyc:BSUB:BSU21170-MONOMER
88783_643894032	O31958	EMBL:AL009126	RefSeq:NP_390000.1	STRING:224308.BSU21170	PaxDb:O31958	EnsemblBacteria:CAB14035	GeneID:939156	KEGG:bsu:BSU21170	GenoList:BSU21170	BioCyc:BSUB:BSU21170-MONOMER
88783_643902957	O31958	EMBL:AL009126	RefSeq:NP_390000.1	STRING:224308.BSU21170	PaxDb:O31958	EnsemblBacteria:CAB14035	GeneID:939156	KEGG:bsu:BSU21170	GenoList:BSU21170	BioCyc:BSUB:BSU21170-MONOMER
88783_643907349	O31958	EMBL:AL009126	RefSeq:NP_390000.1	STRING:224308.BSU21170	PaxDb:O31958	EnsemblBacteria:CAB14035	GeneID:939156	KEGG:bsu:BSU21170	GenoList:BSU21170	BioCyc:BSUB:BSU21170-MONOMER
88347_643907347	O31956	EMBL:AL009126	RefSeq:NP_389998.1	ProteinModelPortal:O31956	STRING:224308.BSU21150	PaxDb:O31956	EnsemblBacteria:CAB14033	GeneID:939155	KEGG:bsu:BSU21150	PATRIC:18976045	GenoList:BSU21150	eggNOG:NOG303052	OrthoDB:EOG6TR0CJ	BioCyc:BSUB:BSU21150-MONOMER
88347_643898425	O31956	EMBL:AL009126	RefSeq:NP_389998.1	ProteinModelPortal:O31956	STRING:224308.BSU21150	PaxDb:O31956	EnsemblBacteria:CAB14033	GeneID:939155	KEGG:bsu:BSU21150	PATRIC:18976045	GenoList:BSU21150	eggNOG:NOG303052	OrthoDB:EOG6TR0CJ	BioCyc:BSUB:BSU21150-MONOMER
88347_643894030	O31956	EMBL:AL009126	RefSeq:NP_389998.1	ProteinModelPortal:O31956	STRING:224308.BSU21150	PaxDb:O31956	EnsemblBacteria:CAB14033	GeneID:939155	KEGG:bsu:BSU21150	PATRIC:18976045	GenoList:BSU21150	eggNOG:NOG303052	OrthoDB:EOG6TR0CJ	BioCyc:BSUB:BSU21150-MONOMER
88347_643902955	O31956	EMBL:AL009126	RefSeq:NP_389998.1	ProteinModelPortal:O31956	STRING:224308.BSU21150	PaxDb:O31956	EnsemblBacteria:CAB14033	GeneID:939155	KEGG:bsu:BSU21150	PATRIC:18976045	GenoList:BSU21150	eggNOG:NOG303052	OrthoDB:EOG6TR0CJ	BioCyc:BSUB:BSU21150-MONOMER
132017_643901090	C0H3U9	EMBL:D50453	EMBL:AL009126	PIR:A69762	RefSeq:YP_003097675.1	STRING:224308.BSU03651	PaxDb:C0H3U9	EnsemblBacteria:CAX52546	GeneID:8302940	KEGG:bsu:BSU03651	PATRIC:18972298	GenoList:BSU03651	eggNOG:NOG09631	HOGENOM:HOG000253370	OrthoDB:EOG6NPMBV	ProtClustDB:CLSK2523506	BioCyc:BSUB:BSU03651-MONOMER	GO:GO:0018799	GO:GO:0019439	GO:GO:0009636
132017_643905468	C0H3U9	EMBL:D50453	EMBL:AL009126	PIR:A69762	RefSeq:YP_003097675.1	STRING:224308.BSU03651	PaxDb:C0H3U9	EnsemblBacteria:CAX52546	GeneID:8302940	KEGG:bsu:BSU03651	PATRIC:18972298	GenoList:BSU03651	eggNOG:NOG09631	HOGENOM:HOG000253370	OrthoDB:EOG6NPMBV	ProtClustDB:CLSK2523506	BioCyc:BSUB:BSU03651-MONOMER	GO:GO:0018799	GO:GO:0019439	GO:GO:0009636
181137_645547149	D3RQU0	EMBL:CP001896	RefSeq:YP_003444806.1	EnsemblBacteria:ADC63774	GeneID:8788258	KEGG:alv:Alvin_2868	PATRIC:31925510	HOGENOM:HOG000005530	BioCyc:AVIN572477:GCJK-2932-MONOMER	GO:GO:0009399	HAMAP:MF_02117	InterPro:IPR024899
17321_643905853	O31530	EMBL:AL009126	PIR:B69798	RefSeq:NP_388590.2	ProteinModelPortal:O31530	IntAct:O31530	STRING:224308.BSU07090	PaxDb:O31530	EnsemblBacteria:CAB12528	GeneID:938776	KEGG:bsu:BSU07090	PATRIC:18973066	GenoList:BSU07090	eggNOG:NOG10866	HOGENOM:HOG000251582	OrthoDB:EOG664CCB	ProtClustDB:CLSK886831	BioCyc:BSUB:BSU07090-MONOMER
17321_643892531	O31530	EMBL:AL009126	PIR:B69798	RefSeq:NP_388590.2	ProteinModelPortal:O31530	IntAct:O31530	STRING:224308.BSU07090	PaxDb:O31530	EnsemblBacteria:CAB12528	GeneID:938776	KEGG:bsu:BSU07090	PATRIC:18973066	GenoList:BSU07090	eggNOG:NOG10866	HOGENOM:HOG000251582	OrthoDB:EOG664CCB	ProtClustDB:CLSK886831	BioCyc:BSUB:BSU07090-MONOMER
17321_643901461	O31530	EMBL:AL009126	PIR:B69798	RefSeq:NP_388590.2	ProteinModelPortal:O31530	IntAct:O31530	STRING:224308.BSU07090	PaxDb:O31530	EnsemblBacteria:CAB12528	GeneID:938776	KEGG:bsu:BSU07090	PATRIC:18973066	GenoList:BSU07090	eggNOG:NOG10866	HOGENOM:HOG000251582	OrthoDB:EOG664CCB	ProtClustDB:CLSK886831	BioCyc:BSUB:BSU07090-MONOMER
17321_643896929	O31530	EMBL:AL009126	PIR:B69798	RefSeq:NP_388590.2	ProteinModelPortal:O31530	IntAct:O31530	STRING:224308.BSU07090	PaxDb:O31530	EnsemblBacteria:CAB12528	GeneID:938776	KEGG:bsu:BSU07090	PATRIC:18973066	GenoList:BSU07090	eggNOG:NOG10866	HOGENOM:HOG000251582	OrthoDB:EOG664CCB	ProtClustDB:CLSK886831	BioCyc:BSUB:BSU07090-MONOMER
17321_643896929	O31530	EMBL:AL009126	PIR:B69798	RefSeq:NP_388590.2	ProteinModelPortal:O31530	IntAct:O31530	STRING:224308.BSU07090	PaxDb:O31530	EnsemblBacteria:CAB12528	GeneID:938776	KEGG:bsu:BSU07090	PATRIC:18973066	GenoList:BSU07090	eggNOG:NOG10866	HOGENOM:HOG000251582	OrthoDB:EOG664CCB	ProtClustDB:CLSK886831	BioCyc:BSUB:BSU07090-MONOMER
53884_638164224	P22795	EMBL:AJ251975	EMBL:AE006641	EMBL:M34696	PIR:C90483	PIR:JQ0768	RefSeq:NP_344332.1	STRING:273057.SSO3021	EnsemblBacteria:AAK43122	GeneID:1453041	KEGG:sso:SSO3021	eggNOG:NOG127345	HOGENOM:HOG000014847	OMA:GTETRDP	ProtClustDB:CLSK883865	BioCyc:SSOL273057:GCH2-2810-MONOMER
64535_641785016	O50407	EMBL:AE000516	EMBL:AL123456	PIR:A70973	RefSeq:NP_217895.1	RefSeq:NP_338010.1	RefSeq:YP_006516861.1	ProteinModelPortal:O50407	STRING:83332.Rv3378c	EnsemblBacteria:AAK47824	EnsemblBacteria:CCP46199	GeneID:13316979	GeneID:888075	GeneID:926542	KEGG:mtc:MT3488	KEGG:mtu:Rv3378c	KEGG:mtv:RVBD_3378c	PATRIC:18129413	TubercuList:Rv3378c	KO:K15911	OMA:LYDLVMM	OrthoDB:EOG6SR8ZC	ProtClustDB:CLSK872173	BioCyc:MetaCyc:MONOMER-13990	BioCyc:MTBCDC:MT3488-MONOMER	BioCyc:MTBRV:RV3378C-MONOMER	GO:GO:0016791	GO:GO:0016765	GO:GO:0052572	GO:GO:0035440	Gene3D:3.40.1180.10	InterPro:IPR001441
104062_638157228	O29557	EMBL:AE000782	PIR:E69337	RefSeq:NP_069535.1	STRING:224325.AF0701	EnsemblBacteria:AAB90545	GeneID:1483919	KEGG:afu:AF0701	eggNOG:NOG117808	OMA:LIHADHY	ProtClustDB:CLSK541521	BioCyc:AFUL224325:GJBC-717-MONOMER
155619_638158824	O28047	EMBL:AE000782	PIR:D69529	RefSeq:NP_071061.1	ProteinModelPortal:O28047	EnsemblBacteria:AAB89020	GeneID:1485467	KEGG:afu:AF2236	eggNOG:NOG323928	OMA:DWFNEIW	ProtClustDB:CLSK862768	BioCyc:AFUL224325:GJBC-2283-MONOMER	GO:GO:0016021	GO:GO:0005886
5980_640287397	L7J6G8	EMBL:JH795400
5980_640295164	I1RIX7	EnsemblFungi:FGSG_03774T0	OrthoDB:EOG7QNVX8
5980_645755750	M7U509	EMBL:KB707778	GO:GO:0030430	GO:GO:0016887	GO:GO:0000287	GO:GO:0019079	InterPro:IPR002512	Pfam:PF01525
5980_643313075	Q2UI90	EMBL:AP007157	RefSeq:XP_001820727.1	EnsemblFungi:CADAORAT00007296	GeneID:5992729	KEGG:aor:AOR_1_254144	HOGENOM:HOG000187209	OMA:WYYWSGM	OrthoDB:EOG7QNVX8
5980_643180843	B5WWJ0	EMBL:ABYL01000302	EnsemblBacteria:EDZ97256	PATRIC:30440132
5980_643313436	Q2UH88	EMBL:AP007157	EnsemblFungi:CADAORAT00007657	HOGENOM:HOG000187209	OMA:QFYSHES	OrthoDB:EOG7QNVX8
5980_640408429	A2QXD2	EMBL:AM270244	EnsemblFungi:CADANGAT00009172	HOGENOM:HOG000217759	OrthoDB:EOG75QRF8	GO:GO:0016787
5980_642984818	O85727	EMBL:AF073896	PATRIC:29741603	GO:GO:0008168
5980_641147412	A6EZR6	EMBL:ABCP01000010	EnsemblBacteria:EDM48035	PATRIC:28808871
5980_638832314	A3SFE1	EMBL:AALV01000006	EnsemblBacteria:EAP83167	PATRIC:28305203
5980_638841490	A3SYU3	EMBL:AALZ01000005	EnsemblBacteria:EAP80045	PATRIC:28312347
5980_640282507	L7J7B7	EMBL:JH795779
5980_643316568	Q2U8I0	EMBL:AP007164	RefSeq:XP_001823268.1	EnsemblFungi:CADAORAT00010755	GeneID:5995325	KEGG:aor:AOR_1_774114	HOGENOM:HOG000187209	OMA:RPETYDR	OrthoDB:EOG7QNVX8
5980_640406999	A2QT75	EMBL:AM270193	EnsemblFungi:CADANGAT00007643	HOGENOM:HOG000187209	OrthoDB:EOG7QNVX8	GO:GO:0016787
5980_640283624	L7JML7	EMBL:JH795830
5980_641431392	A8TRA3	EMBL:ABHC01000007	EnsemblBacteria:EDP64826	PATRIC:30876721
5980_638598619	S5NQV7	EMBL:CP006469	RefSeq:YP_008327914.1	GeneID:16882395
5980_638513724	S5NQV7	EMBL:CP006469	RefSeq:YP_008327914.1	GeneID:16882395
5980_641850169	S5NQV7	EMBL:CP006469	RefSeq:YP_008327914.1	GeneID:16882395
5980_640656930	S5NQV7	EMBL:CP006469	RefSeq:YP_008327914.1	GeneID:16882395
5980_638602160	S5NQV7	EMBL:CP006469	RefSeq:YP_008327914.1	GeneID:16882395
5980_638969563	S5NQV7	EMBL:CP006469	RefSeq:YP_008327914.1	GeneID:16882395
5980_638518371	S5NQV7	EMBL:CP006469	RefSeq:YP_008327914.1	GeneID:16882395
5980_644417637	Q63M16	EMBL:BX571966	RefSeq:YP_110855.1	STRING:272560.BPSS0844	EnsemblBacteria:CAH38306	GeneID:3096187	KEGG:bps:BPSS0844	PATRIC:19269532	HOGENOM:HOG000187209	OMA:RPETYDR	OrthoDB:EOG62K1T9	ProtClustDB:CLSK786775	BioCyc:BPSE272560:GJNI-4399-MONOMER
5980_643199844	Q63M16	EMBL:BX571966	RefSeq:YP_110855.1	STRING:272560.BPSS0844	EnsemblBacteria:CAH38306	GeneID:3096187	KEGG:bps:BPSS0844	PATRIC:19269532	HOGENOM:HOG000187209	OMA:RPETYDR	OrthoDB:EOG62K1T9	ProtClustDB:CLSK786775	BioCyc:BPSE272560:GJNI-4399-MONOMER
5980_641987654	Q63M16	EMBL:BX571966	RefSeq:YP_110855.1	STRING:272560.BPSS0844	EnsemblBacteria:CAH38306	GeneID:3096187	KEGG:bps:BPSS0844	PATRIC:19269532	HOGENOM:HOG000187209	OMA:RPETYDR	OrthoDB:EOG62K1T9	ProtClustDB:CLSK786775	BioCyc:BPSE272560:GJNI-4399-MONOMER
5980_638549453	Q63M16	EMBL:BX571966	RefSeq:YP_110855.1	STRING:272560.BPSS0844	EnsemblBacteria:CAH38306	GeneID:3096187	KEGG:bps:BPSS0844	PATRIC:19269532	HOGENOM:HOG000187209	OMA:RPETYDR	OrthoDB:EOG62K1T9	ProtClustDB:CLSK786775	BioCyc:BPSE272560:GJNI-4399-MONOMER
5980_638533692	Q63M16	EMBL:BX571966	RefSeq:YP_110855.1	STRING:272560.BPSS0844	EnsemblBacteria:CAH38306	GeneID:3096187	KEGG:bps:BPSS0844	PATRIC:19269532	HOGENOM:HOG000187209	OMA:RPETYDR	OrthoDB:EOG62K1T9	ProtClustDB:CLSK786775	BioCyc:BPSE272560:GJNI-4399-MONOMER
5980_641995953	Q63M16	EMBL:BX571966	RefSeq:YP_110855.1	STRING:272560.BPSS0844	EnsemblBacteria:CAH38306	GeneID:3096187	KEGG:bps:BPSS0844	PATRIC:19269532	HOGENOM:HOG000187209	OMA:RPETYDR	OrthoDB:EOG62K1T9	ProtClustDB:CLSK786775	BioCyc:BPSE272560:GJNI-4399-MONOMER
5980_638873925	Q63M16	EMBL:BX571966	RefSeq:YP_110855.1	STRING:272560.BPSS0844	EnsemblBacteria:CAH38306	GeneID:3096187	KEGG:bps:BPSS0844	PATRIC:19269532	HOGENOM:HOG000187209	OMA:RPETYDR	OrthoDB:EOG62K1T9	ProtClustDB:CLSK786775	BioCyc:BPSE272560:GJNI-4399-MONOMER
5980_638539456	Q63M16	EMBL:BX571966	RefSeq:YP_110855.1	STRING:272560.BPSS0844	EnsemblBacteria:CAH38306	GeneID:3096187	KEGG:bps:BPSS0844	PATRIC:19269532	HOGENOM:HOG000187209	OMA:RPETYDR	OrthoDB:EOG62K1T9	ProtClustDB:CLSK786775	BioCyc:BPSE272560:GJNI-4399-MONOMER
5980_641979350	Q63M16	EMBL:BX571966	RefSeq:YP_110855.1	STRING:272560.BPSS0844	EnsemblBacteria:CAH38306	GeneID:3096187	KEGG:bps:BPSS0844	PATRIC:19269532	HOGENOM:HOG000187209	OMA:RPETYDR	OrthoDB:EOG62K1T9	ProtClustDB:CLSK786775	BioCyc:BPSE272560:GJNI-4399-MONOMER
5980_638556561	Q63M16	EMBL:BX571966	RefSeq:YP_110855.1	STRING:272560.BPSS0844	EnsemblBacteria:CAH38306	GeneID:3096187	KEGG:bps:BPSS0844	PATRIC:19269532	HOGENOM:HOG000187209	OMA:RPETYDR	OrthoDB:EOG62K1T9	ProtClustDB:CLSK786775	BioCyc:BPSE272560:GJNI-4399-MONOMER
5980_641963723	Q63M16	EMBL:BX571966	RefSeq:YP_110855.1	STRING:272560.BPSS0844	EnsemblBacteria:CAH38306	GeneID:3096187	KEGG:bps:BPSS0844	PATRIC:19269532	HOGENOM:HOG000187209	OMA:RPETYDR	OrthoDB:EOG62K1T9	ProtClustDB:CLSK786775	BioCyc:BPSE272560:GJNI-4399-MONOMER
5980_638849632	Q63M16	EMBL:BX571966	RefSeq:YP_110855.1	STRING:272560.BPSS0844	EnsemblBacteria:CAH38306	GeneID:3096187	KEGG:bps:BPSS0844	PATRIC:19269532	HOGENOM:HOG000187209	OMA:RPETYDR	OrthoDB:EOG62K1T9	ProtClustDB:CLSK786775	BioCyc:BPSE272560:GJNI-4399-MONOMER
5980_642003965	Q63M16	EMBL:BX571966	RefSeq:YP_110855.1	STRING:272560.BPSS0844	EnsemblBacteria:CAH38306	GeneID:3096187	KEGG:bps:BPSS0844	PATRIC:19269532	HOGENOM:HOG000187209	OMA:RPETYDR	OrthoDB:EOG62K1T9	ProtClustDB:CLSK786775	BioCyc:BPSE272560:GJNI-4399-MONOMER
5980_641955511	Q63M16	EMBL:BX571966	RefSeq:YP_110855.1	STRING:272560.BPSS0844	EnsemblBacteria:CAH38306	GeneID:3096187	KEGG:bps:BPSS0844	PATRIC:19269532	HOGENOM:HOG000187209	OMA:RPETYDR	OrthoDB:EOG62K1T9	ProtClustDB:CLSK786775	BioCyc:BPSE272560:GJNI-4399-MONOMER
5980_638742081	U1F6R0	EMBL:AEVV03000023
5980_638747886	U1F6R0	EMBL:AEVV03000023
5980_642885078	E0U687	EMBL:CP002198	RefSeq:YP_003885698.1	EnsemblBacteria:ADN12423	GeneID:9736836	KEGG:cyj:Cyan7822_0377	PATRIC:42281226	HOGENOM:HOG000187209	OMA:FHENDTE	BioCyc:CSP497965:GJAC-383-MONOMER
5980_645622123	D8JTH0	EMBL:CP002083	RefSeq:YP_003754853.1	EnsemblBacteria:ADJ22532	GeneID:9386593	KEGG:hdn:Hden_0712	HOGENOM:HOG000136730	OMA:KVDLLYP	BioCyc:HDEN582899:GIWL-719-MONOMER
5980_638943826	A3Y7Q6	EMBL:AANE01000002	EnsemblBacteria:EAQ66803	PATRIC:28813873
5980_640412731	A2R986	EMBL:AM270384	EnsemblFungi:CADANGAT00013445
10470_643098301	U2ICT7	EMBL:AWUY01000283
10470_642808920	U2ICT7	EMBL:AWUY01000283
10470_643043148	U2ICT7	EMBL:AWUY01000283
10470_641042775	U2ICT7	EMBL:AWUY01000283
10470_642197408	U2ICT7	EMBL:AWUY01000283
10470_645278616	U2ICT7	EMBL:AWUY01000283
10470_645282962	U2ICT7	EMBL:AWUY01000283
10470_642794129	U2ICT7	EMBL:AWUY01000283
10470_643120729	U2ICT7	EMBL:AWUY01000283
10470_644144752	S0F7A9	EMBL:ACBW01000084
10470_643130632	C9KSM1	EMBL:ABXI02000012	EnsemblBacteria:EEX46950	PATRIC:27010928
10470_645274693	G5SL33	EMBL:AFFY01000001	EnsemblBacteria:EHH02038	OrthoDB:EOG6091JK
10470_641387821	D4WH52	EMBL:ADMO01000076	EnsemblBacteria:EFF52135	PATRIC:36635409
10470_642182074	B0MVS2	EMBL:ABFK02000017	EnsemblBacteria:EDS04125	PATRIC:24454255
10470_641043136	A7ACP0	EMBL:AAXE02000083	EnsemblBacteria:EDN87392	PATRIC:25872967
10470_645275060	E4VT71	EMBL:EQ973213	EnsemblBacteria:EFR52482	PATRIC:27020675
10470_642792402	B3JE24	EMBL:ABIY02000016	EnsemblBacteria:EDV02727	PATRIC:26979764
10470_643157627	B7BDY1	EMBL:ABYH01000350	EnsemblBacteria:EEC95365	PATRIC:25867752
10470_641389540	A7V7D5	EMBL:AAYH02000047	EnsemblBacteria:EDO52705	PATRIC:27173332
10470_642811890	B3CCD1	EMBL:ABJL02000008	EnsemblBacteria:EDV04641	PATRIC:27035374
10470_644423588	D7VZX5	EMBL:ACKQ02000007	EnsemblBacteria:EFK33905
10470_644423706	D7W0M6	EMBL:ACKQ02000007	EnsemblBacteria:EFK34025
10470_644336199	C2G232	EMBL:ACHB01000086	EnsemblBacteria:EEI90722	PATRIC:29426619
10470_643040828	K9EAK9	EMBL:ADLF01000023	EnsemblBacteria:EKU87922
10470_642793209	K9EAK9	EMBL:ADLF01000023	EnsemblBacteria:EKU87922
10470_642810221	I8WVT2	EMBL:AGXI01000001	EnsemblBacteria:EIY41962
10470_644169327	E2NJK2	EMBL:ACCH01000347	EnsemblBacteria:EEF87922	PATRIC:26976771
10470_642197059	S3YQU9	EMBL:ATFP01000026
10470_643132994	S3YQU9	EMBL:ATFP01000026
10470_645275185	I9VS44	EMBL:AGXP01000023	EnsemblBacteria:EIY98648
10470_642812808	I9VS44	EMBL:AGXP01000023	EnsemblBacteria:EIY98648
10470_645275245	I8YEU5	EMBL:AGXU01000030	EnsemblBacteria:EIY61665
10470_642795479	I8Z794	EMBL:AGXV01000001	EnsemblBacteria:EIY71305
10470_641380900	A7LRQ3	EMBL:AAXF02000033	EnsemblBacteria:EDO13856	PATRIC:27041437
10470_642181729	B0MUM4	EMBL:ABFK02000017	EnsemblBacteria:EDS03788	PATRIC:24453661
10470_645281580	K6AGT1	EMBL:ACUA01000017	EnsemblBacteria:EKN27234
10470_644334504	D7VNN4	EMBL:ACHA02000011	EnsemblBacteria:EFK57531
10470_645434810	D7VNN4	EMBL:ACHA02000011	EnsemblBacteria:EFK57531
10470_644424358	D7W2W6	EMBL:ACKQ02000007	EnsemblBacteria:EFK34677
10470_644332601	C2FRX2	EMBL:ACHB01000002	EnsemblBacteria:EEI94337	PATRIC:29435730
10470_645433744	D7VTZ7	EMBL:ACHA02000015	EnsemblBacteria:EFK55692
10470_645436390	D7VT50	EMBL:ACHA02000012	EnsemblBacteria:EFK56951
10470_641389244	Q5LEJ2	EMBL:CR626927	RefSeq:YP_211396.1	STRING:272559.BF1760	EnsemblBacteria:CAH07459	GeneID:3285881	KEGG:bfs:BF1760	PATRIC:21039960	eggNOG:NOG264563	HOGENOM:HOG000269135	OMA:NFGEKRA	OrthoDB:EOG6091JK	ProtClustDB:CLSK822028	BioCyc:BFRA272559:GKF0-1694-MONOMER
10470_644334069	C2FW18	EMBL:ACHB01000036	EnsemblBacteria:EEI92798	PATRIC:29430691
10470_643123753	B6W513	EMBL:ABWZ01000083	EnsemblBacteria:EEB22877	PATRIC:27002105
10470_643095697	B7ADJ7	EMBL:ABVO01000006	EnsemblBacteria:EEC55172	PATRIC:27003624
10470_643157434	B7BDE3	EMBL:ABYH01000332	EnsemblBacteria:EEC95547	PATRIC:25867390
10470_643120973	B6VX73	EMBL:ABWZ01000035	EnsemblBacteria:EEB25641	PATRIC:26997180
10470_642811428	B6VX73	EMBL:ABWZ01000035	EnsemblBacteria:EEB25641	PATRIC:26997180
10470_644333603	C2FUQ5	EMBL:ACHB01000025	EnsemblBacteria:EEI93388	PATRIC:29429785
10470_644335971	C2G1F8	EMBL:ACHB01000079	EnsemblBacteria:EEI90867	PATRIC:29432446
10470_644420747	J3CBT8	EMBL:AKJY01000094	EnsemblBacteria:EJL68439
10470_644420339	D7W0U5	EMBL:ACKQ02000007	EnsemblBacteria:EFK36121
10470_642181667	K1R5R7	EMBL:AJWZ01011672
10470_645627830	C3JCN5	EMBL:ACNN01000035	EnsemblBacteria:EEN82065	PATRIC:29514725
10470_644723165	C3JCN5	EMBL:ACNN01000035	EnsemblBacteria:EEN82065	PATRIC:29514725
10470_644334689	C2FXT2	EMBL:ACHB01000049	EnsemblBacteria:EEI92294	PATRIC:29433203
14741_645134576	B9XK59	EMBL:ABOX02000024	EnsemblBacteria:EEF59697	PATRIC:31328216
14741_645422573	D9XLV8	EMBL:GG657758	EnsemblBacteria:EFL43264
14741_644072417	D7B1F3	EMBL:CP002040	RefSeq:YP_003679050.1	EnsemblBacteria:ADH66544	GeneID:9244948	KEGG:nda:Ndas_1102	PATRIC:38212046	HOGENOM:HOG000035504	OMA:FWGSFDL	BioCyc:NDAS446468:GHUM-1122-MONOMER
14741_645216394	D6AMN4	EMBL:DS999644	EnsemblBacteria:EFE79513	PATRIC:25417774
14741_645233506	D6AMN4	EMBL:DS999644	EnsemblBacteria:EFE79513	PATRIC:25417774
14741_645226444	D6AMN4	EMBL:DS999644	EnsemblBacteria:EFE79513	PATRIC:25417774
14741_645127671	J9WL77	EMBL:CP002275	RefSeq:YP_006732025.1	EnsemblBacteria:AFS16933	GeneID:13662472	KEGG:mid:MIP_07339
14741_644384861	D3SCJ8	EMBL:CP001905	RefSeq:YP_003461307.1	EnsemblBacteria:ADC72571	GeneID:8807855	KEGG:tkm:TK90_2080	PATRIC:32527742	HOGENOM:HOG000035504	BioCyc:TSP396595:GH8D-2127-MONOMER
14741_640220885	A1ZM00	EMBL:AAWS01000015	EnsemblBacteria:EAY28532	PATRIC:26276458
14741_643173409	B5WAF9	EMBL:ABYL01000001	EnsemblBacteria:EEA04527
14741_638921090	A3WUR5	EMBL:AAMY01000005	EnsemblBacteria:EAQ36144
14741_640614789	A3HRU0	EMBL:AAXU02000001	EnsemblBacteria:EAZ82558
14741_644012502	D2S656	EMBL:CP001867	RefSeq:YP_003407644.1	EnsemblBacteria:ADB73273	GeneID:8752145	KEGG:gob:Gobs_0491	PATRIC:32170121	HOGENOM:HOG000035504	OMA:FWGSFDL	BioCyc:GOBS526225:GI00-502-MONOMER
14741_644083878	D1A4Y7	EMBL:CP001738	RefSeq:YP_003300194.1	EnsemblBacteria:ACY98156	GeneID:8603938	KEGG:tcu:Tcur_2601	PATRIC:32514874	HOGENOM:HOG000035504	OMA:FWGSFDL	OrthoDB:EOG64NB0B	BioCyc:TCUR471852:GHHD-2648-MONOMER
14741_645208521	D6A476	EMBL:DS999641	EnsemblBacteria:EFE71630
14741_645179703	D2AWL0	EMBL:CP001814	RefSeq:YP_003339749.1	EnsemblBacteria:ACZ87006	GeneID:8667392	KEGG:sro:Sros_4098	PATRIC:32470147	HOGENOM:HOG000035504	OMA:FWGSFDL	OrthoDB:EOG64NB0B	BioCyc:SROS479432:GI0V-4128-MONOMER
14741_645415557	D9XHN7	EMBL:GG657757	EnsemblBacteria:EFL37066
14741_641118657	A5P933	EMBL:ABCG01000002	EnsemblBacteria:EDL49627	PATRIC:30320932
14741_638916297	A3WHA3	EMBL:AAMW01000002	EnsemblBacteria:EAQ28715	PATRIC:30318290
14741_645216716	D6B5Y7	EMBL:CP004370	EMBL:DS999645	RefSeq:YP_007749003.1	EnsemblBacteria:AGI92000	EnsemblBacteria:EFE79815	GeneID:15149519	KEGG:salb:XNR_5694	PATRIC:29729864
14741_645218236	D6B1E8	EMBL:CP004370	EMBL:DS999645	RefSeq:YP_007747555.1	EnsemblBacteria:AGI90552	EnsemblBacteria:EFE81275	GeneID:15148044	KEGG:salb:XNR_4220	PATRIC:29732858
14741_645152388	D1ANS1	EMBL:CP001739	RefSeq:YP_003309806.1	EnsemblBacteria:ACZ09875	GeneID:8598487	KEGG:str:Sterm_3033	PATRIC:32410066	HOGENOM:HOG000103574	OMA:FWGSFDL	OrthoDB:EOG64NB0B	BioCyc:STER526218:GHLD-3059-MONOMER
17321_645549728	E8RQ09	EMBL:CP002395	RefSeq:YP_004086217.1	EnsemblBacteria:ADU12066	GeneID:10051919	KEGG:aex:Astex_0370	PATRIC:45148684	HOGENOM:HOG000251582	BioCyc:AEXC573065:GJ7A-370-MONOMER	InterPro:IPR006311	PROSITE:PS51318
17321_639158426	Q1NHW3	EMBL:AAQG01000001	EnsemblBacteria:EAT10268	PATRIC:29451604	InterPro:IPR006311	PROSITE:PS51318
17321_645392242	D9WPI5	EMBL:GG657754	EnsemblBacteria:EFL21850
17321_643001337	D6XCJ9	EMBL:CM000951	EnsemblBacteria:EFH28471	InterPro:IPR006311	PROSITE:PS51318
17321_645595196	D0KD04	EMBL:CP001790	RefSeq:YP_003261627.1	STRING:561231.Pecwa_4328	EnsemblBacteria:ACX90020	GeneID:8532771	KEGG:pwa:Pecwa_4328	PATRIC:32282939	eggNOG:NOG10866	HOGENOM:HOG000251582	OMA:VGLRDFW	OrthoDB:EOG664CCB	BioCyc:PWAS561231:GHO0-4422-MONOMER	InterPro:IPR006311	PROSITE:PS51318
17321_643319213	Q2U128	EMBL:AP007171	ProteinModelPortal:Q2U128	EnsemblFungi:CADAORAT00004985	HOGENOM:HOG000251582	OMA:VGLRDFW	OrthoDB:EOG7X6M7N
17321_643312028	Q2UL68	EMBL:AP007155	EnsemblFungi:CADAORAT00001150	HOGENOM:HOG000251582	OMA:HANEATG	OrthoDB:EOG7X6M7N
17321_639310558	Q65KX7	EMBL:AE017333	RefSeq:YP_006712761.1	ProteinModelPortal:Q65KX7	EnsemblBacteria:AAU40287	GeneID:3099428	KEGG:bld:BLi01383	PATRIC:18948343	HOGENOM:HOG000251582	ProtClustDB:CLSK886831
17321_643905853	N0D9H6	EMBL:AP012496	ProteinModelPortal:N0D9H6
17321_643892531	N0D9H6	EMBL:AP012496	ProteinModelPortal:N0D9H6
17321_643901461	N0D9H6	EMBL:AP012496	ProteinModelPortal:N0D9H6
17321_643896929	N0D9H6	EMBL:AP012496	ProteinModelPortal:N0D9H6
17321_643896929	N0D9H6	EMBL:AP012496	ProteinModelPortal:N0D9H6
18278_645405605	S1SHG7	EMBL:CM001889
18278_645420851	D9XML3	EMBL:GG657758	EnsemblBacteria:EFL41727
18278_645410013	D9X3J5	EMBL:GG657757	EnsemblBacteria:EFL31628
18278_643001975	B5I222	EMBL:CM000951	EnsemblBacteria:EDY59127
18278_645395265	D9W8R0	EMBL:GG657754	EnsemblBacteria:EFL24748
18278_642803607	B5G7F9	EMBL:GG770539	EnsemblBacteria:EDY42255
18278_645230690	D6ADS1	EMBL:DS999644	EnsemblBacteria:EFE76757	PATRIC:25412226
18278_645213598	D6ADS1	EMBL:DS999644	EnsemblBacteria:EFE76757	PATRIC:25412226
18278_645207712	D5ZV84	EMBL:DS999641	EnsemblBacteria:EFE70816	PATRIC:25325793
18278_645176810	D2B4T9	EMBL:CP001814	RefSeq:YP_003338368.1	EnsemblBacteria:ACZ85625	GeneID:8665945	KEGG:sro:Sros_2659	PATRIC:32467287	HOGENOM:HOG000227280	OMA:RGAYYPF	OrthoDB:EOG6V7BQM	BioCyc:SROS479432:GI0V-2681-MONOMER
18278_645216798	K1UKM7	EMBL:AMPN01000301	EnsemblBacteria:EKC92179
18278_642989553	B5H0T6	EMBL:DS570689	EMBL:CM000913	EnsemblBacteria:EDY52182	EnsemblBacteria:EFG05200	PATRIC:29750637
18278_644070476	D7B0J2	EMBL:CP002040	RefSeq:YP_003678905.1	EnsemblBacteria:ADH66399	GeneID:9244800	KEGG:nda:Ndas_0955	PATRIC:38211732	HOGENOM:HOG000227280	OMA:RGAYYPF	BioCyc:NDAS446468:GHUM-974-MONOMER
18278_644084525	D1AEM7	EMBL:CP001738	RefSeq:YP_003299640.1	EnsemblBacteria:ACY97602	GeneID:8603365	KEGG:tcu:Tcur_2035	PATRIC:32513710	HOGENOM:HOG000227280	OMA:RGAYYPF	OrthoDB:EOG6V7BQM	BioCyc:TCUR471852:GHHD-2075-MONOMER
18278_645154883	D1C2Q4	EMBL:CP001823	RefSeq:YP_003319343.1	EnsemblBacteria:ACZ38521	GeneID:8638478	KEGG:sti:Sthe_1085	PATRIC:32424913	HOGENOM:HOG000227280	OMA:RGAYYPF	OrthoDB:EOG6V7BQM	BioCyc:STHE479434:GHJN-1107-MONOMER
18278_638176911	Q8TP14	EMBL:AE010299	RefSeq:NP_617031.1	STRING:188937.MA2113	EnsemblBacteria:AAM05511	GeneID:1474001	KEGG:mac:MA2113	eggNOG:NOG06485	OMA:RGAYYPF	ProtClustDB:CLSK2754566	BioCyc:MACE188937:GI2O-2131-MONOMER
18278_638184462	Q5UYK4	EMBL:AY596297	RefSeq:YP_137355.1	STRING:272569.rrnAC2907	EnsemblBacteria:AAV47649	GeneID:3130201	KEGG:hma:rrnAC2907	eggNOG:NOG06485	HOGENOM:HOG000227280	OMA:RGAYYPF	ProtClustDB:CLSK2766596	BioCyc:HMAR272569:GJDH-2610-MONOMER
18278_644027098	E4NS44	EMBL:CP001690	RefSeq:YP_004035168.1	EnsemblBacteria:ADQ65729	GeneID:9991938	KEGG:hbo:Hbor_01180	HOGENOM:HOG000227280	OMA:RGAYYPF	BioCyc:HBOR469382:GCNS-118-MONOMER
18278_644379970	D3SV06	EMBL:CP001932	EMBL:AOHS01000037	RefSeq:YP_003479976.1	EnsemblBacteria:ADD05414	EnsemblBacteria:ELY29272	GeneID:8824682	KEGG:nmg:Nmag_1841	HOGENOM:HOG000227280	OMA:RGAYYPF	BioCyc:NMAG547559:GJAP-1868-MONOMER
18663_643019510	Q7D7H9	EMBL:AE000516	RefSeq:NP_336643.1	STRING:83331.MT2174	EnsemblBacteria:AAK46457	GeneID:923808	KEGG:mtc:MT2174	PATRIC:18126538	HOGENOM:HOG000047836	OrthoDB:EOG6T4RZB	ProtClustDB:CLSK872011	BioCyc:MTBCDC:MT2174-MONOMER	InterPro:IPR016792	PIRSF:PIRSF021573
18663_638727350	T5H9C3	EMBL:ANFI01000037
18663_645192209	Q7D7H9	EMBL:AE000516	RefSeq:NP_336643.1	STRING:83331.MT2174	EnsemblBacteria:AAK46457	GeneID:923808	KEGG:mtc:MT2174	PATRIC:18126538	HOGENOM:HOG000047836	OrthoDB:EOG6T4RZB	ProtClustDB:CLSK872011	BioCyc:MTBCDC:MT2174-MONOMER	InterPro:IPR016792	PIRSF:PIRSF021573
18663_643045549	Q7D7H9	EMBL:AE000516	RefSeq:NP_336643.1	STRING:83331.MT2174	EnsemblBacteria:AAK46457	GeneID:923808	KEGG:mtc:MT2174	PATRIC:18126538	HOGENOM:HOG000047836	OrthoDB:EOG6T4RZB	ProtClustDB:CLSK872011	BioCyc:MTBCDC:MT2174-MONOMER	InterPro:IPR016792	PIRSF:PIRSF021573
18663_643028678	Q7D7H9	EMBL:AE000516	RefSeq:NP_336643.1	STRING:83331.MT2174	EnsemblBacteria:AAK46457	GeneID:923808	KEGG:mtc:MT2174	PATRIC:18126538	HOGENOM:HOG000047836	OrthoDB:EOG6T4RZB	ProtClustDB:CLSK872011	BioCyc:MTBCDC:MT2174-MONOMER	InterPro:IPR016792	PIRSF:PIRSF021573
18663_643050081	Q7D7H9	EMBL:AE000516	RefSeq:NP_336643.1	STRING:83331.MT2174	EnsemblBacteria:AAK46457	GeneID:923808	KEGG:mtc:MT2174	PATRIC:18126538	HOGENOM:HOG000047836	OrthoDB:EOG6T4RZB	ProtClustDB:CLSK872011	BioCyc:MTBCDC:MT2174-MONOMER	InterPro:IPR016792	PIRSF:PIRSF021573
18663_645120849	Q7D7H9	EMBL:AE000516	RefSeq:NP_336643.1	STRING:83331.MT2174	EnsemblBacteria:AAK46457	GeneID:923808	KEGG:mtc:MT2174	PATRIC:18126538	HOGENOM:HOG000047836	OrthoDB:EOG6T4RZB	ProtClustDB:CLSK872011	BioCyc:MTBCDC:MT2174-MONOMER	InterPro:IPR016792	PIRSF:PIRSF021573
18663_643032263	Q7D7H9	EMBL:AE000516	RefSeq:NP_336643.1	STRING:83331.MT2174	EnsemblBacteria:AAK46457	GeneID:923808	KEGG:mtc:MT2174	PATRIC:18126538	HOGENOM:HOG000047836	OrthoDB:EOG6T4RZB	ProtClustDB:CLSK872011	BioCyc:MTBCDC:MT2174-MONOMER	InterPro:IPR016792	PIRSF:PIRSF021573
18663_643036443	Q7D7H9	EMBL:AE000516	RefSeq:NP_336643.1	STRING:83331.MT2174	EnsemblBacteria:AAK46457	GeneID:923808	KEGG:mtc:MT2174	PATRIC:18126538	HOGENOM:HOG000047836	OrthoDB:EOG6T4RZB	ProtClustDB:CLSK872011	BioCyc:MTBCDC:MT2174-MONOMER	InterPro:IPR016792	PIRSF:PIRSF021573
18663_643036443	Q7D7H9	EMBL:AE000516	RefSeq:NP_336643.1	STRING:83331.MT2174	EnsemblBacteria:AAK46457	GeneID:923808	KEGG:mtc:MT2174	PATRIC:18126538	HOGENOM:HOG000047836	OrthoDB:EOG6T4RZB	ProtClustDB:CLSK872011	BioCyc:MTBCDC:MT2174-MONOMER	InterPro:IPR016792	PIRSF:PIRSF021573
18663_643023123	Q7D7H9	EMBL:AE000516	RefSeq:NP_336643.1	STRING:83331.MT2174	EnsemblBacteria:AAK46457	GeneID:923808	KEGG:mtc:MT2174	PATRIC:18126538	HOGENOM:HOG000047836	OrthoDB:EOG6T4RZB	ProtClustDB:CLSK872011	BioCyc:MTBCDC:MT2174-MONOMER	InterPro:IPR016792	PIRSF:PIRSF021573
18663_641783708	Q7D7H9	EMBL:AE000516	RefSeq:NP_336643.1	STRING:83331.MT2174	EnsemblBacteria:AAK46457	GeneID:923808	KEGG:mtc:MT2174	PATRIC:18126538	HOGENOM:HOG000047836	OrthoDB:EOG6T4RZB	ProtClustDB:CLSK872011	BioCyc:MTBCDC:MT2174-MONOMER	InterPro:IPR016792	PIRSF:PIRSF021573
18663_645116231	Q7D7H9	EMBL:AE000516	RefSeq:NP_336643.1	STRING:83331.MT2174	EnsemblBacteria:AAK46457	GeneID:923808	KEGG:mtc:MT2174	PATRIC:18126538	HOGENOM:HOG000047836	OrthoDB:EOG6T4RZB	ProtClustDB:CLSK872011	BioCyc:MTBCDC:MT2174-MONOMER	InterPro:IPR016792	PIRSF:PIRSF021573
18663_645124017	J9WB73	EMBL:CP002275	RefSeq:YP_006729369.1	EnsemblBacteria:AFS14280	GeneID:13659791	KEGG:mid:MIP_03320	InterPro:IPR016792	PIRSF:PIRSF021573
18663_645163827	D2QBZ1	EMBL:CP001769	RefSeq:YP_003388525.1	EnsemblBacteria:ADB39726	GeneID:8727478	KEGG:sli:Slin_3725	PATRIC:32437375	HOGENOM:HOG000047836	OMA:TYQKASH	BioCyc:SLIN504472:GHKB-3750-MONOMER
18663_638177133	Q8TNF9	EMBL:AE010299	RefSeq:NP_617239.1	EnsemblBacteria:AAM05719	GeneID:1474218	KEGG:mac:MA2329	eggNOG:NOG14507	OMA:TYQKASH	ProtClustDB:CLSK2303242	BioCyc:MACE188937:GI2O-2349-MONOMER	InterPro:IPR016792	PIRSF:PIRSF021573
18663_641161832	A6G572	EMBL:ABCS01000024	EnsemblBacteria:EDM78984	PATRIC:29494939
21340_645210710	D6ARI2	EMBL:DS999644	EnsemblBacteria:EFE73884	PATRIC:25406468
21340_645227832	D6ARI2	EMBL:DS999644	EnsemblBacteria:EFE73884	PATRIC:25406468
21340_642993582	B5HCM0	EMBL:CM000950	EnsemblBacteria:EDY64581
21340_645409915	D9X290	EMBL:GG657757	EnsemblBacteria:EFL31532
21340_643002079	B5I2C7	EMBL:CM000951	EnsemblBacteria:EDY59232
21340_645420939	D9XNZ3	EMBL:GG657758	EnsemblBacteria:EFL41810
21340_645206885	D6A9H5	EMBL:DS999641	EnsemblBacteria:EFE70009	PATRIC:25324109
21340_645383192	D9VLQ6	EMBL:GG657750	EnsemblBacteria:EFL13062
21340_644082683	D1A9Q1	EMBL:CP001738	RefSeq:YP_003300775.1	EnsemblBacteria:ACY98737	GeneID:8604542	KEGG:tcu:Tcur_3196	PATRIC:32516120	HOGENOM:HOG000237899	OMA:WQWTSGD	OrthoDB:EOG6T7N96	BioCyc:TCUR471852:GHHD-3252-MONOMER
21340_645169989	D3Q3I3	EMBL:CP001778	RefSeq:YP_003511117.1	EnsemblBacteria:ADD42024	GeneID:8883533	KEGG:sna:Snas_2338	PATRIC:35366987	HOGENOM:HOG000237899	OMA:EYFENDS	BioCyc:SNAS446470:GHHC-2360-MONOMER
21340_645160933	D2QHY4	EMBL:CP001769	RefSeq:YP_003385671.1	EnsemblBacteria:ADB36872	GeneID:8724540	KEGG:sli:Slin_0809	PATRIC:32431507	HOGENOM:HOG000237899	OMA:WQWTSGD	BioCyc:SLIN504472:GHKB-812-MONOMER
21340_640287277	L7JM97	EMBL:JH794283
21340_644176170	C0CUY3	EMBL:ACCJ01000031	EnsemblBacteria:EEG57098
21340_640615622	A3HU66	EMBL:AAXU02000001	EnsemblBacteria:EAZ81688
21340_642878585	B4AIL2	EMBL:ABRX01000003	EnsemblBacteria:EDW21790	PATRIC:25205831
21340_641440039	A8ULM0	EMBL:ABHI01000003	EnsemblBacteria:EDP70601	PATRIC:27401884
21340_640221956	A1ZPZ3	EMBL:AAWS01000022	EnsemblBacteria:EAY27648	PATRIC:26278567
21340_638989489	A4APU2	EMBL:CP002157	RefSeq:YP_003862294.1	EnsemblBacteria:EAR03014	GeneID:9719016	KEGG:fbc:FB2170_06985	PATRIC:42332835	HOGENOM:HOG000237899	OMA:FTVANNA	BioCyc:MSP313603:GH3X-1662-MONOMER
21340_640218551	A1ZFE1	EMBL:AAWS01000005	EnsemblBacteria:EAY30715	PATRIC:26271952
21340_645180994	D2ASJ3	EMBL:CP001814	RefSeq:YP_003341259.1	EnsemblBacteria:ACZ88516	GeneID:8669064	KEGG:sro:Sros_5770	PATRIC:32473385	HOGENOM:HOG000237899	OrthoDB:EOG6T7N96	BioCyc:SROS479432:GI0V-5800-MONOMER
21650_642440780	B1T4F9	EMBL:ABLK01000071	EnsemblBacteria:EDT41557	PATRIC:38384865
21650_642440357	B1T386	EMBL:ABLK01000055	EnsemblBacteria:EDT41984	PATRIC:38384011
21650_642439652	B1T181	EMBL:ABLK01000032	EnsemblBacteria:EDT42664	PATRIC:38382557
21650_638912727	A3W688	EMBL:AAMV01000012	EnsemblBacteria:EAQ23724	PATRIC:28141451
21650_638843096	A3T3D0	EMBL:AALZ01000022	EnsemblBacteria:EAP78511	PATRIC:28314665
21650_643301318	B7XL09	EMBL:ABGB01000145	RefSeq:XP_002650687.1	GeneID:8642323	EuPathDB:MicrosporidiaDB:EBI_23295
21650_644195114	D2ZVD9	EMBL:ACDX02000005	EnsemblBacteria:EFC88920
21635_644134134	C0VXK4	EMBL:ABYP01000097	EnsemblBacteria:EEI25886	PATRIC:25284591
21635_645603364	D5CLI9	EMBL:CP001965	RefSeq:YP_003522964.1	EnsemblBacteria:ADE10577	GeneID:8890993	KEGG:slt:Slit_0335	PATRIC:35398738	HOGENOM:HOG000279546	BioCyc:SLIT580332:GH9F-338-MONOMER	GO:GO:0016829
21635_644340604	C2GEE0	EMBL:ACHF01000011	EnsemblBacteria:EEI64222	PATRIC:25279882
21635_645185936	D1B6Q9	EMBL:CP001818	RefSeq:YP_003317982.1	EnsemblBacteria:ACZ19700	GeneID:8631327	KEGG:tai:Taci_1470	PATRIC:32494306	HOGENOM:HOG000279546	OMA:MRLWSLH	OrthoDB:EOG61KBPB	BioCyc:TACI525903:GH4K-1518-MONOMER	GO:GO:0016829
21635_645632736	C6REC5	EMBL:ACVQ01000013	EnsemblBacteria:EET80301	PATRIC:27770865
21635_644261498	B9CYK3	EMBL:ACFU01000002	EnsemblBacteria:EEF15200	PATRIC:27764028
21635_645652517	B9K8Z1	EMBL:CP000916	RefSeq:YP_002534790.1	STRING:309803.CTN_1248	EnsemblBacteria:ACM23424	GeneID:7377635	KEGG:tna:CTN_1248	PATRIC:23941308	eggNOG:NOG69913	HOGENOM:HOG000279546	OrthoDB:EOG61KBPB	ProtClustDB:CLSK917903	BioCyc:TNEA309803:GJFG-1293-MONOMER	GO:GO:0016829
21635_645628863	C6R4J0	EMBL:ACVO01000015	EnsemblBacteria:EET75290
21635_644254136	C0W034	EMBL:ACFG01000030	EnsemblBacteria:EEH63893	PATRIC:24371408	OrthoDB:EOG61KBPB
23895_640017629	A0YT71	EMBL:AAVU01000026	REBASE:23893	EnsemblBacteria:EAW35707	PATRIC:30992648	OMA:LMAKFDH
23895_642894185	B4BSM2	EMBL:ABVH01000020	EnsemblBacteria:EDY04284	PATRIC:28773702
23895_641046572	A6NPK8	EMBL:AAXG02000001	REBASE:23845	EnsemblBacteria:EDN02090	PATRIC:31026496
23895_641383298	I8Y5B3	EMBL:AGXT01000027	EnsemblBacteria:EIY58305
23895_641746120	A5TSG5	EMBL:CM000440	REBASE:20686	EnsemblBacteria:EDK87840	PATRIC:30263781
23895_641411255	A8SIT0	EMBL:ABEE02000014	EnsemblBacteria:EDP24751	PATRIC:25887070
23895_638645572	S9PTW3	EMBL:ALUB01000019
23895_644267749	D4CHD4	EMBL:ACFX02000051	EnsemblBacteria:EFE10787
23895_644130397	C2BFN3	EMBL:ABYO01000196	REBASE:30096	EnsemblBacteria:EEI86320	PATRIC:24479106
23895_644347520	C0XNN2	EMBL:ACHJ01000009	EnsemblBacteria:EEI18141	PATRIC:25296006
23895_644135712	E2S6B4	EMBL:ABYQ02000014	EnsemblBacteria:EFQ79556
23895_645631685	C6RBE1	EMBL:ACVP01000027	EnsemblBacteria:EET76773	PATRIC:27680496
23895_644280329	C2CMY6	EMBL:ACGE01000033	EnsemblBacteria:EEI78960	PATRIC:27672680
23895_643911638	C5E8N3	EMBL:DS990238	REBASE:23616	EnsemblBacteria:EEQ54355	PATRIC:26495192	OrthoDB:EOG6MWN7J
23895_644164710	D4BMI1	EMBL:ACCG02000005	EnsemblBacteria:EFE90000	OrthoDB:EOG6MWN7J
23895_644278892	C0WJQ7	EMBL:ACGD01000043	EnsemblBacteria:EEI14114	PATRIC:29084188
23417_643036066	F7WQ75	EMBL:CP001642	RefSeq:YP_005909450.1	EnsemblBacteria:AEJ50455	GeneID:12499475	KEGG:mtl:CCDC5180_1618	OMA:FFETTQH	BioCyc:MTUB443150:GLGS-1642-MONOMER
23417_638158026	O28806	EMBL:AE000782	PIR:A69433	RefSeq:NP_070295.1	STRING:224325.AF1466	EnsemblBacteria:AAB89780	GeneID:1484692	KEGG:afu:AF1466	eggNOG:NOG13904	OMA:PERYINT	BioCyc:AFUL224325:GJBC-1499-MONOMER
23417_643031906	T5GK47	EMBL:ANFI01000119
23417_643031906	T5GK47	EMBL:ANFI01000119
23417_645191845	T5GK47	EMBL:ANFI01000119
23417_643028301	T5GK47	EMBL:ANFI01000119
23417_643028306	T5GK47	EMBL:ANFI01000119
23417_638727004	T5GK47	EMBL:ANFI01000119
23417_641783329	T5GK47	EMBL:ANFI01000119
23417_643045195	T5GK47	EMBL:ANFI01000119
23417_645120490	T5GK47	EMBL:ANFI01000119
23417_645115876	T5GK47	EMBL:ANFI01000119
23417_643049709	T5GK47	EMBL:ANFI01000119
23417_643023550	T5GK47	EMBL:ANFI01000119
23417_643019142	T5GK47	EMBL:ANFI01000119
23417_643316636	Q2U8B4	EMBL:AP007164	ProteinModelPortal:Q2U8B4	EnsemblFungi:CADAORAT00010823	HOGENOM:HOG000089237	OMA:PERYINT	OrthoDB:EOG7XDBRT
23417_645544745	C5S4Y7	EMBL:ACQL01000163	EnsemblBacteria:EER46028	PATRIC:24365068
24328_638998770	A4BFZ4	EMBL:AAOE01000014	EnsemblBacteria:EAR09012	PATRIC:28435570
24328_644028675	E4NUK0	EMBL:CP001691	EMBL:AOHT01000044	RefSeq:YP_004044381.1	EnsemblBacteria:ADQ68720	EnsemblBacteria:ELY25460	GeneID:9989134	KEGG:hbo:Hbor_31850	HOGENOM:HOG000003665	OMA:FVWWGRV	BioCyc:HBOR469382:GCNS-3184-MONOMER
24328_639162840	Q1N5I1	EMBL:AAQH01000001	EnsemblBacteria:EAT13961	PATRIC:27182426
24328_645156244	D1C957	EMBL:CP001824	RefSeq:YP_003321172.1	EnsemblBacteria:ACZ40350	GeneID:8646885	KEGG:sti:Sthe_2946	PATRIC:32428728	HOGENOM:HOG000003665	OMA:FVWWGRV	OrthoDB:EOG60655T	BioCyc:STHE479434:GHJN-3007-MONOMER
24328_638901595	A3V9T4	EMBL:AAMT01000001	EnsemblBacteria:EAQ14675	PATRIC:28479655
24328_640224084	A1ZVY5	EMBL:AAWS01000048	EnsemblBacteria:EAY25467	PATRIC:26282665
24328_644400111	C0GCB1	EMBL:ACJM01000001	EnsemblBacteria:EEG78846	PATRIC:26636975
24328_641437092	A8UBG2	EMBL:ABHH01000025	EnsemblBacteria:EDP67544	PATRIC:31242537
24328_641159066	A6FXD8	EMBL:ABCS01000002	EnsemblBacteria:EDM81526	PATRIC:29489323
24328_645573169	C9RL73	EMBL:CP001792	EMBL:CP002158	RefSeq:YP_003248502.1	RefSeq:YP_005820913.1	STRING:59374.Fisuc_0408	EnsemblBacteria:ACX74020	EnsemblBacteria:ADL26721	GeneID:12432440	GeneID:8520994	KEGG:fsc:FSU_0823	KEGG:fsu:Fisuc_0408	PATRIC:32140591	eggNOG:NOG262050	HOGENOM:HOG000118783	OMA:FEMEVRE	OrthoDB:EOG60655T
24328_638155462	O27015	EMBL:AE000666	PIR:H69224	RefSeq:NP_276069.1	STRING:187420.MTH932	EnsemblBacteria:AAB85430	GeneID:1471340	KEGG:mth:MTH932	eggNOG:NOG262050	OMA:FEMEVRE	ProtClustDB:CLSK2750463	BioCyc:MTHE187420:GJNM-934-MONOMER
24328_645654233	F1TEY0	EMBL:ACXX02000010	EnsemblBacteria:EGD46918
24328_645151785	D1AL45	EMBL:CP001739	RefSeq:YP_003309119.1	EnsemblBacteria:ACZ09188	GeneID:8597799	KEGG:str:Sterm_2334	PATRIC:32408652	OMA:HAYLEIT	OrthoDB:EOG60655T	BioCyc:STER526218:GHLD-2344-MONOMER
24155_638937955	A3XR22	EMBL:AANC01000011	EnsemblBacteria:EAQ48005
24155_638927115	A2TWT2	EMBL:CP004349	RefSeq:YP_007670146.1	EnsemblBacteria:EAQ41147	GeneID:7750327	KEGG:pom:MED152_00495	PATRIC:31150198
24155_645433108	D7VHF2	EMBL:ACHA02000002	EnsemblBacteria:EFK59504
24155_644637058	C3C4T7	EMBL:ACMY01000080	EnsemblBacteria:EEM21652	PATRIC:31021287
24155_638450586	Q4MXN6	EMBL:AAEK01000001	EnsemblBacteria:EAL16933	PATRIC:24952412
24155_644649272	U1W6K3	EMBL:ARXZ02000017
24155_644680597	U1W6K3	EMBL:ARXZ02000017
24155_644642824	U1W6K3	EMBL:ARXZ02000017
24155_644502366	C2RAR0	EMBL:ACMA01000056	EnsemblBacteria:EEK88678	PATRIC:25133834
24155_644613419	J9AHV0	EMBL:AHDR01000027	EnsemblBacteria:EJV66094
24155_644607570	C2ZRU0	EMBL:ACMT01000146	EnsemblBacteria:EEL92898	PATRIC:24815654
24155_644601710	C2ZRU0	EMBL:ACMT01000146	EnsemblBacteria:EEL92898	PATRIC:24815654
24155_644487874	C2Q4U3	EMBL:ACLX01000130	EnsemblBacteria:EEK70217	PATRIC:24844727
24155_644633387	C3BUH6	EMBL:ACMX01000173	EnsemblBacteria:EEM13744	PATRIC:25201015
24155_644519005	R8QEF6	EMBL:AHEZ01000047	EnsemblBacteria:EOP68783
24155_642063755	U1W6K3	EMBL:ARXZ02000017
24155_638167750	Q8PSC5	EMBL:AE008384	RefSeq:NP_635178.1	STRING:192952.MM_3154	EnsemblBacteria:AAM32850	GeneID:1481496	KEGG:mma:MM_3154	eggNOG:NOG11557	HOGENOM:HOG000032036	OMA:YGFIQQI	ProtClustDB:CLSK903348	BioCyc:MMAZ192952:GCK2-3219-MONOMER
24155_645622968	F8D144	EMBL:CP002835	RefSeq:YP_004589181.1	EnsemblBacteria:AEH49100	GeneID:10789392	KEGG:gth:Geoth_3226	BioCyc:GTHE634956:GHH3-3275-MONOMER
24155_640617091	A3HYB4	EMBL:AAXU02000001	EnsemblBacteria:EAZ80250
24155_641461779	A9EDL0	EMBL:ABIB01000023	EnsemblBacteria:EDP94246	PATRIC:30126378
24155_644335476	C2G015	EMBL:ACHB01000069	EnsemblBacteria:EEI91611	PATRIC:29431470
24155_638888211	A3U769	EMBL:CP002046	RefSeq:YP_003715761.1	EnsemblBacteria:EAP88086	GeneID:9296489	KEGG:cat:CA2559_04985	PATRIC:38157574	HOGENOM:HOG000032036	OMA:YGFIQQI	BioCyc:CATL216432:GHTE-1014-MONOMER
25366_640026450	A0ZI62	EMBL:AAVW01000054	EnsemblBacteria:EAW44390	PATRIC:25519945
25366_640018722	A0YWA4	EMBL:AAVU01000040	EnsemblBacteria:EAW34730	PATRIC:30994842	OMA:YELRILN
25366_642883929	E0UF66	EMBL:CP002198	RefSeq:YP_003888712.1	EnsemblBacteria:ADN15437	GeneID:9739986	KEGG:cyj:Cyan7822_3491	PATRIC:42287817	HOGENOM:HOG000035869	OMA:YELRILN	BioCyc:CSP497965:GJAC-3533-MONOMER
25366_643169158	B5VYD8	EMBL:ABYK01000008	EnsemblBacteria:EDZ95840	PATRIC:24529124
25366_640626488	A3IPQ2	EMBL:AAXW01000013	EnsemblBacteria:EAZ91542	PATRIC:27726440
25366_640626488	A3IPQ2	EMBL:AAXW01000013	EnsemblBacteria:EAZ91542	PATRIC:27726440
25366_638430722	T2ID27	EMBL:CAQK01000462
25137_642889965	U4MNS1	EMBL:CBQO010000045
25137_641416553	D2BH10	EMBL:CP001827	RefSeq:YP_003329938.1	EnsemblBacteria:ACZ61610	GeneID:8657396	KEGG:dev:DhcVS_456	PATRIC:32057814	HOGENOM:HOG000016978	OMA:CNCTYEP	OrthoDB:EOG6DC6QF	BioCyc:DSP311424:GJ8J-438-MONOMER
26879_638198735	Q4J7U9	EMBL:CP000077	RefSeq:YP_256425.1	STRING:330779.Saci_1826	EnsemblBacteria:AAY81132	GeneID:3474314	KEGG:sai:Saci_1826	eggNOG:NOG06437	HOGENOM:HOG000268133	OMA:HFVTRRV	ProtClustDB:CLSK803432	BioCyc:SACI330779:GH9J-1795-MONOMER
26879_638163815	Q97VL3	EMBL:AE006641	PIR:D90434	RefSeq:NP_343941.1	ProteinModelPortal:Q97VL3	STRING:273057.SSO2610	EnsemblBacteria:AAK42731	GeneID:1454058	KEGG:sso:SSO2610	eggNOG:NOG06437	HOGENOM:HOG000268133	OMA:HFVTRRV	ProtClustDB:CLSK803432	BioCyc:SSOL273057:GCH2-2417-MONOMER
26879_645553477	Q97VL3	EMBL:AE006641	PIR:D90434	RefSeq:NP_343941.1	ProteinModelPortal:Q97VL3	STRING:273057.SSO2610	EnsemblBacteria:AAK42731	GeneID:1454058	KEGG:sso:SSO2610	eggNOG:NOG06437	HOGENOM:HOG000268133	OMA:HFVTRRV	ProtClustDB:CLSK803432	BioCyc:SSOL273057:GCH2-2417-MONOMER
26879_638192626	Q975L2	EMBL:BA000023	RefSeq:NP_376279.1	STRING:273063.ST0405	EnsemblBacteria:BAB65388	GeneID:1458333	KEGG:sto:ST0405	eggNOG:NOG06437	HOGENOM:HOG000268133	OMA:HFVTRRV	ProtClustDB:CLSK803432	BioCyc:STOK273063:GJC7-468-MONOMER
26879_641441753	A8USL1	EMBL:ABHJ01000002	EnsemblBacteria:EDP76143	PATRIC:38512103
26879_645185837	D1B8D2	EMBL:CP001818	RefSeq:YP_003316817.1	EnsemblBacteria:ACZ18535	GeneID:8630108	KEGG:tai:Taci_0298	PATRIC:32491886	HOGENOM:HOG000014752	OrthoDB:EOG6F81NP	BioCyc:TACI525903:GH4K-298-MONOMER
26879_639154949	Q1NQB2	EMBL:AAQF01000096	EMBL:AAQF01000055	EnsemblBacteria:EAT03887	EnsemblBacteria:EAT04702	PATRIC:38443115
26879_639155769	Q1NQB2	EMBL:AAQF01000096	EMBL:AAQF01000055	EnsemblBacteria:EAT03887	EnsemblBacteria:EAT04702	PATRIC:38443115
26879_644404055	D6SQ58	EMBL:ACJN02000002	EnsemblBacteria:EFI34884
26879_637752722	Q39ZW2	EMBL:CP000142	RefSeq:YP_006718906.1	STRING:338963.Pcar_3110	EnsemblBacteria:ABA90345	GeneID:3725818	KEGG:pca:Pcar_3110	PATRIC:22892646	eggNOG:NOG06437	HOGENOM:HOG000014752	OMA:HFVTRRV	OrthoDB:EOG6F81NP	ProtClustDB:CLSK803432	BioCyc:PCAR338963:GKDU-3412-MONOMER
26879_639157651	Q1NK16	EMBL:AAQF01000308	EnsemblBacteria:EAT02046	PATRIC:38448824
26858_640027779	A0ZLY5	EMBL:AAVW01000111	EnsemblBacteria:EAW43073	PATRIC:25522728
26858_640015391	A0YLV5	EMBL:AAVU01000007	EnsemblBacteria:EAW37867	PATRIC:30988139	OMA:FNLMGIW
26858_643167891	K1WGL7	EMBL:AFXD01000003	EnsemblBacteria:EKD11347	InterPro:IPR027379	Pfam:PF13396
26858_640628518	A3IVG6	EMBL:AAXW01000042	EnsemblBacteria:EAZ89538	PATRIC:27730451
26858_638430327	Q4C6S1	EMBL:AADV02000003	EnsemblBacteria:EAM51897	PATRIC:27699525
26858_642886534	E0UBY6	EMBL:CP002198	RefSeq:YP_003888476.1	EnsemblBacteria:ADN15201	GeneID:9739741	KEGG:cyj:Cyan7822_3250	PATRIC:42287309	HOGENOM:HOG000035699	OMA:ISAWPSF	BioCyc:CSP497965:GJAC-3288-MONOMER
26858_642887285	E0U5Q1	EMBL:CP002198	RefSeq:YP_003889167.1	EnsemblBacteria:ADN15892	GeneID:9740461	KEGG:cyj:Cyan7822_3967	PATRIC:42288838	HOGENOM:HOG000035699	OMA:PFWVYND	BioCyc:CSP497965:GJAC-4008-MONOMER
26858_642887285	E0U5Q1	EMBL:CP002198	RefSeq:YP_003889167.1	EnsemblBacteria:ADN15892	GeneID:9740461	KEGG:cyj:Cyan7822_3967	PATRIC:42288838	HOGENOM:HOG000035699	OMA:PFWVYND	BioCyc:CSP497965:GJAC-4008-MONOMER
27209_644158273	B9Y2J0	EMBL:ACCF01000001	EnsemblBacteria:EEF69800	PATRIC:27538998
27209_645153792	D1AGJ8	EMBL:CP001739	RefSeq:YP_003310881.1	EnsemblBacteria:ACZ10950	GeneID:8599562	KEGG:str:Sterm_4118	PATRIC:32412342	HOGENOM:HOG000222166	OMA:RVIMEEN	OrthoDB:EOG6FZ4DB	BioCyc:STER526218:GHLD-4169-MONOMER
27209_644119659	T0P412	EMBL:AUUE01000002	InterPro:IPR016618	PIRSF:PIRSF014422
27209_645519201	T0P412	EMBL:AUUE01000002	InterPro:IPR016618	PIRSF:PIRSF014422
27209_644319630	C2EQQ5	EMBL:ACGU01000110	EnsemblBacteria:EEJ71058	PATRIC:29220031	OrthoDB:EOG6FZ4DB	InterPro:IPR016618	PIRSF:PIRSF014422
27209_644438956	C2EQQ5	EMBL:ACGU01000110	EnsemblBacteria:EEJ71058	PATRIC:29220031	OrthoDB:EOG6FZ4DB	InterPro:IPR016618	PIRSF:PIRSF014422
27209_644306262	D7V5F7	EMBL:ACGO02000002	EnsemblBacteria:EFJ69287	OrthoDB:EOG6FZ4DB	InterPro:IPR016618	PIRSF:PIRSF014422
27209_644323247	F8DM31	EMBL:CP002844	RefSeq:YP_004648901.1	ProteinModelPortal:F8DM31	EnsemblBacteria:AEI56611	GeneID:10866429	KEGG:lru:HMPREF0538_20399	OMA:RVIMEEN	OrthoDB:EOG6FZ4DB	BioCyc:LREU491077:GH1M-430-MONOMER	InterPro:IPR016618	PIRSF:PIRSF014422
27209_644343694	C2GN29	EMBL:ACHG01000058	EnsemblBacteria:EEI66066	PATRIC:37019211	OrthoDB:EOG6FZ4DB	InterPro:IPR016618	PIRSF:PIRSF014422
27209_644189489	C6LKY6	EMBL:ACCL02000026	EnsemblBacteria:EET58734
27209_638192717	Q975C9	EMBL:BA000023	RefSeq:NP_376363.1	STRING:273063.ST0479	EnsemblBacteria:BAB65472	GeneID:1458421	KEGG:sto:ST0479	eggNOG:NOG09908	HOGENOM:HOG000222166	OMA:YVGYPII	ProtClustDB:CLSK865413	BioCyc:STOK273063:GJC7-557-MONOMER	InterPro:IPR016618	PIRSF:PIRSF014422
28285_643177040	B5WKR1	EMBL:ABYL01000050	EnsemblBacteria:EEA01051	PATRIC:30432493
28285_645565342	Q729D1	EMBL:AE017285	RefSeq:YP_011633.1	STRING:882.DVU2420	DNASU:2794361	EnsemblBacteria:AAS96893	GeneID:2794361	KEGG:dvu:DVU2420	PATRIC:32064454	eggNOG:NOG125177	OMA:VRDIYFR	OrthoDB:EOG6C8N2G	ProtClustDB:CLSK705776	BioCyc:DVUL882:GJIL-2476-MONOMER
28285_638722064	F6G046	EMBL:CP002819	RefSeq:YP_006029165.1	EnsemblBacteria:AEG68629	GeneID:12625403	KEGG:rsn:RSPO_c01329	OMA:VRDIYFR	BioCyc:RSOL1031711:GLJ5-1349-MONOMER	InterPro:IPR011008	SUPFAM:SSF54909
28285_638354762	Q3RDW4	EMBL:AAAL02000008	EnsemblBacteria:EAO12837	PATRIC:26340327
28285_638357382	Q3RDW4	EMBL:AAAL02000008	EnsemblBacteria:EAO12837	PATRIC:26340327
28285_638359151	Q3R1K3	EMBL:AAAM03000079	EnsemblBacteria:EAO31118	PATRIC:26351375
28285_638763828	A2WIH6	EMBL:CH482382	EnsemblBacteria:EAY71772	PATRIC:26871367
29969_639205876	Q0YRP5	EMBL:AASE01000009	EnsemblBacteria:EAT58968	PATRIC:27058163
29969_638934695	A3XI68	EMBL:AANC01000001	EnsemblBacteria:EAQ51025	PATRIC:29230872
29969_641457558	A9DJ78	EMBL:ABIB01000001	EnsemblBacteria:EDP98045	PATRIC:30130957
29969_640627674	A3IT28	EMBL:AAXW01000026	EnsemblBacteria:EAZ90332	PATRIC:27728793
29969_638926573	A2TVM0	EMBL:AAMZ01000008	EnsemblBacteria:EAQ38023	PATRIC:36980787
29969_638990839	A4ATM9	EMBL:CP002157	RefSeq:YP_003860833.1	EnsemblBacteria:EAR00799	GeneID:9717532	KEGG:fbc:FB2170_16981	PATRIC:42329795	HOGENOM:HOG000033253	OMA:IFVYNAN	ProtClustDB:CLSK2784644	BioCyc:MSP313603:GH3X-176-MONOMER
29969_641144416	A6ERB1	EMBL:ABCO01000006	PATRIC:30962642
29969_641438282	A8UEI2	EMBL:ABHI01000001	EnsemblBacteria:EDP72417	PATRIC:27398387
29969_638432415	Q4C0U7	EMBL:AADV02000053	EnsemblBacteria:EAM49758	PATRIC:27704535
29969_639084340	Q26HE5	EMBL:AAPD01000001	EnsemblBacteria:EAS20571	PATRIC:27388108
29969_639119384	K4IH05	EMBL:CP003879	RefSeq:YP_006868562.1	EnsemblBacteria:AFU69812	GeneID:13804321	KEGG:ptq:P700755_003149
29969_638915567	A3WEF4	EMBL:AAMW01000002	EnsemblBacteria:EAQ27992	PATRIC:30316834
28990_640238207	E6XLP5	EMBL:CP002457	RefSeq:YP_006011071.1	EnsemblBacteria:ADV55605	GeneID:12606506	KEGG:shp:Sput200_3209	BioCyc:SPUT399804:GLK4-3316-MONOMER
28990_638729071	Q7D5Z0	EMBL:AE000516	RefSeq:NP_337805.1	STRING:83331.MT3278	EnsemblBacteria:AAK47619	GeneID:923309	KEGG:mtc:MT3278	PATRIC:18128966	HOGENOM:HOG000220614	OrthoDB:EOG6384FS	ProtClustDB:CLSK872149	BioCyc:MTBCDC:MT3278-MONOMER
28990_641784792	Q7D5Z0	EMBL:AE000516	RefSeq:NP_337805.1	STRING:83331.MT3278	EnsemblBacteria:AAK47619	GeneID:923309	KEGG:mtc:MT3278	PATRIC:18128966	HOGENOM:HOG000220614	OrthoDB:EOG6384FS	ProtClustDB:CLSK872149	BioCyc:MTBCDC:MT3278-MONOMER
28990_641784792	Q7D5Z0	EMBL:AE000516	RefSeq:NP_337805.1	STRING:83331.MT3278	EnsemblBacteria:AAK47619	GeneID:923309	KEGG:mtc:MT3278	PATRIC:18128966	HOGENOM:HOG000220614	OrthoDB:EOG6384FS	ProtClustDB:CLSK872149	BioCyc:MTBCDC:MT3278-MONOMER
28990_643983594	D4H1I6	EMBL:CP001968	RefSeq:YP_003504193.1	RefSeq:YP_003504702.1	EnsemblBacteria:ADD68237	EnsemblBacteria:ADD68746	GeneID:8875815	GeneID:8876347	KEGG:dap:Dacet_1467	KEGG:dap:Dacet_1983	PATRIC:35352870	HOGENOM:HOG000220614	BioCyc:DACE522772:GHC2-1480-MONOMER	BioCyc:DACE522772:GHC2-2012-MONOMER
30890_645163298	D2QPL4	EMBL:CP001769	RefSeq:YP_003389472.1	EnsemblBacteria:ADB40673	GeneID:8728459	KEGG:sli:Slin_4695	PATRIC:32439339	HOGENOM:HOG000225415	OMA:NARIYYY	BioCyc:SLIN504472:GHKB-4731-MONOMER
30890_645263873	F2ZH81	EMBL:ABZR01000202	EMBL:ABZR01002537	EnsemblBacteria:EGI01771	EnsemblBacteria:EGI07344
30890_645269513	F2ZH81	EMBL:ABZR01000202	EMBL:ABZR01002537	EnsemblBacteria:EGI01771	EnsemblBacteria:EGI07344
30890_639104517	Q1YLD1	EMBL:AAPJ01000001	EnsemblBacteria:EAS51800	PATRIC:24562755	BioCyc:AURANTIMONAS:SI859A1_02616-MONOMER
30890_645558737	C5T9D3	EMBL:ACQT01000187	EnsemblBacteria:EER58913	PATRIC:38323052
30890_642912175	B4D7F2	EMBL:ABVL01000018	EnsemblBacteria:EDY17569	PATRIC:27080720
30889_638164487	Q8Q0V4	EMBL:AE008384	RefSeq:NP_632051.1	EnsemblBacteria:AAM29723	GeneID:1478369	KEGG:mma:MM_0027	eggNOG:NOG09277	HOGENOM:HOG000006215	OMA:HIYEMEL	ProtClustDB:CLSK900401	BioCyc:MMAZ192952:GCK2-27-MONOMER
30889_638176927	Q8TNZ8	EMBL:AE010299	RefSeq:NP_617047.1	EnsemblBacteria:AAM05527	GeneID:1474017	KEGG:mac:MA2129	eggNOG:NOG09277	OMA:HIYEMEL	ProtClustDB:CLSK900401	BioCyc:MACE188937:GI2O-2147-MONOMER
30889_638164493	Q8Q0U9	EMBL:AE008384	RefSeq:NP_632057.1	EnsemblBacteria:AAM29729	GeneID:1478375	KEGG:mma:MM_0033	eggNOG:NOG09277	HOGENOM:HOG000006215	OMA:NDEMDEA	ProtClustDB:CLSK900401	BioCyc:MMAZ192952:GCK2-33-MONOMER
30889_638176717	Q8TPI8	EMBL:AE010299	RefSeq:NP_616847.1	EnsemblBacteria:AAM05327	GeneID:1473812	KEGG:mac:MA1923	eggNOG:NOG09277	ProtClustDB:CLSK900401	BioCyc:MACE188937:GI2O-1942-MONOMER
30889_645651276	D5X5D8	EMBL:CP002021	RefSeq:YP_003644161.1	EnsemblBacteria:ADG31831	GeneID:9153222	KEGG:tin:Tint_2488	PATRIC:38295537	HOGENOM:HOG000006215	BioCyc:TINT75379:GH6C-2526-MONOMER
30889_644046966	D2PUU6	EMBL:CP001736	RefSeq:YP_003380211.1	EnsemblBacteria:ADB31412	GeneID:8718936	KEGG:kfl:Kfla_2336	PATRIC:32235069	HOGENOM:HOG000006215	OMA:HIYEMEL	BioCyc:KFLA479435:GI0F-2359-MONOMER
30889_641431952	A8TTB6	EMBL:ABHC01000010	EnsemblBacteria:EDP64066	PATRIC:30877828
30889_638923784	A3X2D7	EMBL:AAMY01000044	EnsemblBacteria:EAQ33601
30889_641435036	A8U4C1	EMBL:ABHC01000046	EnsemblBacteria:EDP61062	PATRIC:30883814
30865_641111218	A6CB86	EMBL:ABCE01000029	EnsemblBacteria:EDL57981	PATRIC:30931788
30865_644022742	D0LMC6	EMBL:CP001804	RefSeq:YP_003268725.1	STRING:502025.Hoch_4337	EnsemblBacteria:ACY16832	GeneID:8546740	KEGG:hoh:Hoch_4337	PATRIC:32198459	eggNOG:NOG83888	HOGENOM:HOG000048248	OrthoDB:EOG6GJBRW	BioCyc:HOCH502025:GI43-4370-MONOMER
30865_644383860	D3SUY3	EMBL:CP001932	EMBL:AOHS01000037	RefSeq:YP_003479953.1	EnsemblBacteria:ADD05391	EnsemblBacteria:ELY29294	GeneID:8824658	KEGG:nmg:Nmag_1817	OMA:WESRRTI	BioCyc:NMAG547559:GJAP-1844-MONOMER
30865_640985572	I7M539	EMBL:AAUP02000006	EnsemblBacteria:EAX32490
30865_641811090	I7M539	EMBL:AAUP02000006	EnsemblBacteria:EAX32490
30865_645136347	B9XQ66	EMBL:ABOX02000052	EnsemblBacteria:EEF57984	PATRIC:31332084
30366_643038601	T5HJW4	EMBL:ANBL01000002
30366_643025840	T5HJW4	EMBL:ANBL01000002
30366_641785797	T5HJW4	EMBL:ANBL01000002
30366_645117967	T5HJW4	EMBL:ANBL01000002
30366_645190175	T5HJW4	EMBL:ANBL01000002
30366_645122561	T5HJW4	EMBL:ANBL01000002
30366_645122561	T5HJW4	EMBL:ANBL01000002
30366_638728819	T5HJW4	EMBL:ANBL01000002
30366_643047983	S5EYB0	EMBL:CP006578	RefSeq:YP_008224293.1	GeneID:16856862
30366_643034365	S5EYB0	EMBL:CP006578	RefSeq:YP_008224293.1	GeneID:16856862
30366_643026568	S5EYB0	EMBL:CP006578	RefSeq:YP_008224293.1	GeneID:16856862
30366_643047642	D5Z9Z6	EMBL:DS986671	EnsemblBacteria:EFD75830	PATRIC:30746802
32524_641114461	A6CKG3	EMBL:ABCF01000003	EnsemblBacteria:EDL65735	PATRIC:25228799
32524_639060604	Q2BD59	EMBL:AAOX01000003	EnsemblBacteria:EAR67752	PATRIC:36910827
32524_642182407	B0MWR1	EMBL:ABFK02000019	EnsemblBacteria:EDS03310	PATRIC:24450036
32524_640617766	A3I078	EMBL:AAXU02000001	EnsemblBacteria:EAZ79874
32524_644029591	E4NVS6	EMBL:CP001693	EMBL:AOHT01000001	RefSeq:YP_004044502.1	EnsemblBacteria:ADQ69146	EnsemblBacteria:ELY31818	GeneID:9989442	KEGG:hbo:Hbor_38320	OMA:TECRSEV	BioCyc:HBOR469382:GCNS-3627-MONOMER	GO:GO:0016874
32524_641113800	A6CIK2	EMBL:ABCF01000001	EnsemblBacteria:EDL66472	PATRIC:25227579
32524_644382980	D3ST87	EMBL:CP001932	EMBL:AOHS01000041	RefSeq:YP_003481516.1	EnsemblBacteria:ADD06954	EnsemblBacteria:ELY28421	GeneID:8826270	KEGG:nmg:Nmag_3404	HOGENOM:HOG000038861	OMA:TECRSEV	BioCyc:NMAG547559:GJAP-3457-MONOMER
32524_644166837	E2NCJ2	EMBL:ACCH01000156	EnsemblBacteria:EEF90362	PATRIC:26972309
32524_644421870	D7VX06	EMBL:ACKQ02000003	EnsemblBacteria:EFK37208
32524_644333573	C2FUM5	EMBL:ACHB01000025	EnsemblBacteria:EEI93358	PATRIC:29429721
32524_642809275	B3C9J9	EMBL:ABJL02000007	EnsemblBacteria:EDV06078	PATRIC:27030287
32524_645158933	D2QB95	EMBL:CP001769	RefSeq:YP_003384876.1	EnsemblBacteria:ADB36077	GeneID:8723731	KEGG:sli:Slin_0003	PATRIC:32429893	HOGENOM:HOG000109445	OMA:KINEPEM	BioCyc:SLIN504472:GHKB-3-MONOMER
32363_639863810	Q08S30	EMBL:CP002271	EMBL:AAMD01000172	RefSeq:YP_003954959.1	EnsemblBacteria:ADO73132	EnsemblBacteria:EAU63285	GeneID:9878854	KEGG:sur:STAUR_5361	PATRIC:38561539	BioCyc:SAUR378806:GCZI-5361-MONOMER
32363_645178964	D2AYM0	EMBL:CP001814	RefSeq:YP_003341746.1	EnsemblBacteria:ACZ89003	GeneID:8669587	KEGG:sro:Sros_6278	PATRIC:32474419	HOGENOM:HOG000159139	OMA:MAGNEDL	OrthoDB:EOG6S26D8	BioCyc:SROS479432:GI0V-6323-MONOMER
32363_638882543	A3TR72	EMBL:AAMN01000004	EnsemblBacteria:EAP97668	PATRIC:27565714
32126_641119728	A5PC43	EMBL:ABCG01000005	EnsemblBacteria:EDL48613	PATRIC:30323039
32126_640025176	A0ZEK3	EMBL:AAVW01000023	EnsemblBacteria:EAW45662	PATRIC:25517259
32126_641115293	A6CMR4	EMBL:ABCF01000012	EnsemblBacteria:EDL64878	PATRIC:25230390
32126_639060115	Q2BEJ8	EMBL:AAOX01000002	EnsemblBacteria:EAR68100	PATRIC:36908497
32126_639047696	Q2CE76	EMBL:AAOT01000019	EnsemblBacteria:EAR50984	PATRIC:28497934
32126_641451327	D6XSC7	EMBL:CP001791	RefSeq:YP_003699279.1	EnsemblBacteria:ADH98713	GeneID:9263771	KEGG:bse:Bsel_1200	PATRIC:38121681	HOGENOM:HOG000267298	BioCyc:BSEL439292:GHLG-1261-MONOMER
32126_639889354	Q05SC5	EMBL:AAUA01000003	EnsemblBacteria:EAU73005	PATRIC:29882460
32126_641451233	D6XUH7	EMBL:CP001791	RefSeq:YP_003700029.1	EnsemblBacteria:ADH99463	GeneID:9264535	KEGG:bse:Bsel_1959	PATRIC:38123269	HOGENOM:HOG000267298	OMA:YNALIGY	BioCyc:BSEL439292:GHLG-2024-MONOMER
32126_644383545	D3T1H2	EMBL:CP001933	RefSeq:YP_003481993.1	EnsemblBacteria:ADD07431	GeneID:8826760	KEGG:nmg:Nmag_3890	HOGENOM:HOG000267298	BioCyc:NMAG547559:GJAP-3946-MONOMER
31732_639171396	Q73HD7	EMBL:AE017196	RefSeq:NP_966394.1	STRING:163164.WD0628	EnsemblBacteria:AAS14328	GeneID:2737776	KEGG:wol:WD0628	PATRIC:24029833	eggNOG:NOG39636	HOGENOM:HOG000224307	OMA:YHCDQHV	OrthoDB:EOG6HQSNX	ProtClustDB:CLSK925577	BioCyc:WEND163164:GJ8W-614-MONOMER
31732_638477967	Q4EAI9	EMBL:AAGB01000119	EnsemblBacteria:EAL58460	PATRIC:25687140
31732_643188634	U4PC37	EMBL:HG428761
31732_639001367	A4BNA0	EMBL:AAOF01000002	EnsemblBacteria:EAR22699	PATRIC:25484749
31732_644382244	D3SYJ5	EMBL:CP001932	EMBL:AOHS01000010	RefSeq:YP_003478668.1	EnsemblBacteria:ADD04106	EnsemblBacteria:ELY33263	GeneID:8823346	KEGG:nmg:Nmag_0519	HOGENOM:HOG000224307	OMA:YHCDQHV	BioCyc:NMAG547559:GJAP-532-MONOMER
34344_639938982	A0NKA5	EMBL:AAUV01000057	EnsemblBacteria:EAV39109	PATRIC:28528572
34344_641059390	A5KYV2	EMBL:AAZW01000010	EnsemblBacteria:EDK29385	PATRIC:25663219
34344_645449231	C2I230	EMBL:ACHW01000015	EnsemblBacteria:EEO07758	PATRIC:30071625
34344_638705310	D7HH56	EMBL:GG774563	EnsemblBacteria:EFH72676
34344_645242924	Q5F8R2	EMBL:AE004969	RefSeq:YP_207837.1	STRING:242231.NGO0701	EnsemblBacteria:AAW89425	GeneID:3281809	KEGG:ngo:NGO0701	PATRIC:20334512	eggNOG:NOG67547	HOGENOM:HOG000270329	OMA:QRFYTTP	OrthoDB:EOG6SFP8T	ProtClustDB:CLSK937073	BioCyc:NGON242231:GI2G-665-MONOMER
34344_645249917	Q5F8R2	EMBL:AE004969	RefSeq:YP_207837.1	STRING:242231.NGO0701	EnsemblBacteria:AAW89425	GeneID:3281809	KEGG:ngo:NGO0701	PATRIC:20334512	eggNOG:NOG67547	HOGENOM:HOG000270329	OMA:QRFYTTP	OrthoDB:EOG6SFP8T	ProtClustDB:CLSK937073	BioCyc:NGON242231:GI2G-665-MONOMER
34344_645245097	Q5F8R2	EMBL:AE004969	RefSeq:YP_207837.1	STRING:242231.NGO0701	EnsemblBacteria:AAW89425	GeneID:3281809	KEGG:ngo:NGO0701	PATRIC:20334512	eggNOG:NOG67547	HOGENOM:HOG000270329	OMA:QRFYTTP	OrthoDB:EOG6SFP8T	ProtClustDB:CLSK937073	BioCyc:NGON242231:GI2G-665-MONOMER
34344_645247531	Q5F8R2	EMBL:AE004969	RefSeq:YP_207837.1	STRING:242231.NGO0701	EnsemblBacteria:AAW89425	GeneID:3281809	KEGG:ngo:NGO0701	PATRIC:20334512	eggNOG:NOG67547	HOGENOM:HOG000270329	OMA:QRFYTTP	OrthoDB:EOG6SFP8T	ProtClustDB:CLSK937073	BioCyc:NGON242231:GI2G-665-MONOMER
34344_645256813	Q5F8R2	EMBL:AE004969	RefSeq:YP_207837.1	STRING:242231.NGO0701	EnsemblBacteria:AAW89425	GeneID:3281809	KEGG:ngo:NGO0701	PATRIC:20334512	eggNOG:NOG67547	HOGENOM:HOG000270329	OMA:QRFYTTP	OrthoDB:EOG6SFP8T	ProtClustDB:CLSK937073	BioCyc:NGON242231:GI2G-665-MONOMER
34344_645252268	Q5F8R2	EMBL:AE004969	RefSeq:YP_207837.1	STRING:242231.NGO0701	EnsemblBacteria:AAW89425	GeneID:3281809	KEGG:ngo:NGO0701	PATRIC:20334512	eggNOG:NOG67547	HOGENOM:HOG000270329	OMA:QRFYTTP	OrthoDB:EOG6SFP8T	ProtClustDB:CLSK937073	BioCyc:NGON242231:GI2G-665-MONOMER
34344_645240810	Q5F8R2	EMBL:AE004969	RefSeq:YP_207837.1	STRING:242231.NGO0701	EnsemblBacteria:AAW89425	GeneID:3281809	KEGG:ngo:NGO0701	PATRIC:20334512	eggNOG:NOG67547	HOGENOM:HOG000270329	OMA:QRFYTTP	OrthoDB:EOG6SFP8T	ProtClustDB:CLSK937073	BioCyc:NGON242231:GI2G-665-MONOMER
34344_645254736	Q5F8R2	EMBL:AE004969	RefSeq:YP_207837.1	STRING:242231.NGO0701	EnsemblBacteria:AAW89425	GeneID:3281809	KEGG:ngo:NGO0701	PATRIC:20334512	eggNOG:NOG67547	HOGENOM:HOG000270329	OMA:QRFYTTP	OrthoDB:EOG6SFP8T	ProtClustDB:CLSK937073	BioCyc:NGON242231:GI2G-665-MONOMER
34344_645238802	E8SPV4	EMBL:CP002440	RefSeq:YP_005889751.1	EnsemblBacteria:ADV07888	GeneID:12406213	KEGG:ngt:NGTW08_0920	PATRIC:45471186	BioCyc:NGON940296:GLHN-926-MONOMER
34344_645258975	E8SPV4	EMBL:CP002440	RefSeq:YP_005889751.1	EnsemblBacteria:ADV07888	GeneID:12406213	KEGG:ngt:NGTW08_0920	PATRIC:45471186	BioCyc:NGON940296:GLHN-926-MONOMER
34344_644199119	D0W4G0	EMBL:ACDY02000009	EnsemblBacteria:EEZ71286
34803_645427316	A0QMI1	EMBL:CP000479	RefSeq:YP_884119.1	STRING:243243.MAV_5000	EnsemblBacteria:ABK66881	GeneID:4527886	KEGG:mav:MAV_5000	PATRIC:17991690	eggNOG:NOG81641	HOGENOM:HOG000044533	OMA:VEWLNVS	OrthoDB:EOG66MQK5	ProtClustDB:CLSK924881	BioCyc:MAVI243243:GH3Y-4999-MONOMER
34803_640022265	A0Z6C3	EMBL:AAVV01000008	EnsemblBacteria:EAW40468	PATRIC:25928671
34803_644013866	D0L399	EMBL:CP001802	RefSeq:YP_003274922.1	STRING:526226.Gbro_3851	EnsemblBacteria:ACY23029	GeneID:8553232	KEGG:gbr:Gbro_3851	PATRIC:32187401	eggNOG:NOG81641	HOGENOM:HOG000044533	OMA:VEWLNVS	OrthoDB:EOG66MQK5	BioCyc:GBRO526226:GHJF-3895-MONOMER
34803_638758806	A2W5P9	EMBL:CH482379	PRIDE:A2W5P9	EnsemblBacteria:EAY67295	PATRIC:26859744
34744_642193674	B0NDA8	EMBL:ABFY02000014	EnsemblBacteria:EDS07337	PATRIC:27226138
34744_644264758	D4CD13	EMBL:ACFX02000021	EnsemblBacteria:EFE12349
34744_641401251	R0CKB2	EMBL:AGYI01000005	EnsemblBacteria:ENZ57082
34744_644400120	C0GCC0	EMBL:ACJM01000001	EnsemblBacteria:EEG78855	PATRIC:26636993	GO:GO:0008168
34744_644228138	C0EYT0	EMBL:ACEP01000112	EnsemblBacteria:EEG35567	PATRIC:30669824
34744_641038045	A6BH23	EMBL:AAXB02000007	EnsemblBacteria:EDM63011	PATRIC:36986726
34744_643162537	C0C4J4	EMBL:ABYI02000034	EnsemblBacteria:EEG72987	PATRIC:30579611
34744_641005636	A5ZR30	EMBL:AAVO02000004	EnsemblBacteria:EDM88037	PATRIC:29800671
34744_644357190	D6S9B4	EMBL:ACHM02000002	EnsemblBacteria:EFH93392
34744_645535381	E8WHI8	EMBL:CP002479	RefSeq:YP_004198564.1	EnsemblBacteria:ADW13288	GeneID:10197421	KEGG:geb:GM18_1825	PATRIC:46947574	HOGENOM:HOG000003431	OMA:NRCCKRS	BioCyc:GSP443143:GHZL-1861-MONOMER	GO:GO:0008168
38275_645571112	E8URJ8	EMBL:CP002466	RefSeq:YP_004185904.1	EnsemblBacteria:ADV79521	GeneID:10163201	KEGG:tbo:Thebr_0941	PATRIC:47039842	HOGENOM:HOG000012874	BioCyc:TBRO509193:GHWP-975-MONOMER
38275_645645833	E1FES6	EMBL:ACXP02000002	EnsemblBacteria:EFK84603
38275_645525761	E1FES6	EMBL:ACXP02000002	EnsemblBacteria:EFK84603
38275_645606865	D9TMM6	EMBL:CP002171	RefSeq:YP_003853169.1	EnsemblBacteria:ADL70085	GeneID:9708220	KEGG:ttm:Tthe_2634	PATRIC:42454702	HOGENOM:HOG000012874	BioCyc:TTHE580327:GHGH-2708-MONOMER
38275_645598773	C9RHF2	EMBL:CP001787	RefSeq:YP_003247486.1	STRING:579137.Metvu_1146	EnsemblBacteria:ACX73004	GeneID:8513485	KEGG:mvu:Metvu_1146	eggNOG:NOG140149	HOGENOM:HOG000012874	OMA:VSWCFKN	BioCyc:MVUL579137:GHFP-1159-MONOMER
38275_645573803	C9RRH2	EMBL:CP001792	EMBL:CP002158	RefSeq:YP_003249640.1	RefSeq:YP_005821961.1	STRING:59374.Fisuc_1563	EnsemblBacteria:ACX75158	EnsemblBacteria:ADL24791	GeneID:12433594	GeneID:8522173	KEGG:fsc:FSU_2047	KEGG:fsu:Fisuc_1563	PATRIC:32142893	eggNOG:NOG140149	HOGENOM:HOG000012874	OMA:VSWCFKN	OrthoDB:EOG6T4S1V
38275_641127706	A6DE62	EMBL:ABCJ01000009	EnsemblBacteria:EDM23120	PATRIC:30460098
38275_643924585	C5EZ83	EMBL:DS990442	EnsemblBacteria:EEQ63198	PATRIC:27516661
38275_644261661	B9CZH2	EMBL:ACFU01000003	EnsemblBacteria:EEF14955	PATRIC:27764375
38275_643921878	I7HE06	EMBL:AP012492	RefSeq:YP_007601843.1	EnsemblBacteria:BAM33212	GeneID:14953627	KEGG:hcb:HCBAA847_1994
40014_645515988	R3VZ82	EMBL:ASDA01000006	EnsemblBacteria:EOL35270
40014_645350000	T9LMZ8	EMBL:AWDM01000019
40014_645622146	D8JQ54	EMBL:CP002083	RefSeq:YP_003754296.1	RefSeq:YP_003755700.1	EnsemblBacteria:ADJ21975	EnsemblBacteria:ADJ23379	GeneID:9386022	GeneID:9387461	KEGG:hdn:Hden_0148	KEGG:hdn:Hden_1568	OMA:IHGYEIK	BioCyc:HDEN582899:GIWL-148-MONOMER	BioCyc:HDEN582899:GIWL-1588-MONOMER
40014_643301337	B7XL28	EMBL:ABGB01000156	RefSeq:XP_002650706.1	GeneID:8642342	EuPathDB:MicrosporidiaDB:EBI_22192
40014_641014429	A3GS54	EMBL:AAWD01000089	EnsemblBacteria:EAZ72336
38828_639868069	Q0G0X9	EMBL:AATP01000005	EnsemblBacteria:EAU40860	PATRIC:27667851
38828_639106562	Q1YFK0	EMBL:AAPJ01000006	EnsemblBacteria:EAS48973	PATRIC:24564069	BioCyc:AURANTIMONAS:SI859A1_03180-MONOMER
38828_638944289	A3Y913	EMBL:AANE01000003	EnsemblBacteria:EAQ66350	PATRIC:28821493
38828_641454931	A9D4Z8	EMBL:ABIA02000004	EnsemblBacteria:EDQ33999	PATRIC:27532651
38828_640641574	A3JXC4	EMBL:AAYA01000001	EnsemblBacteria:EBA10160	PATRIC:29855644
38828_638890714	A3UE88	EMBL:AAMQ01000001	EnsemblBacteria:EAP91569	PATRIC:25534256
38828_640648506	A4EIV0	EMBL:AAYB01000002	EnsemblBacteria:EBA12513	PATRIC:28096473
38828_640652112	A4EU12	EMBL:AAYC01000004	EnsemblBacteria:EBA17201	PATRIC:28120078
38828_641151176	A6FA95	EMBL:ABCQ01000008	EnsemblBacteria:EDM67910	PATRIC:25978694
38525_645600933	F9ZMF1	EMBL:CP002573	RefSeq:YP_004748000.1	EnsemblBacteria:AEK57300	GeneID:10988437	KEGG:acu:Atc_0651	BioCyc:ACAL990288:GJBS-662-MONOMER
38525_638164421	Q97U13	EMBL:AE006641	PIR:F90506	RefSeq:NP_344519.1	ProteinModelPortal:Q97U13	STRING:273057.SSO3213	EnsemblBacteria:AAK43309	GeneID:1453228	KEGG:sso:SSO3213	eggNOG:NOG09900	HOGENOM:HOG000270408	OMA:WPYTRDI	ProtClustDB:CLSK803639	BioCyc:SSOL273057:GCH2-2998-MONOMER
38525_645553275	Q97U13	EMBL:AE006641	PIR:F90506	RefSeq:NP_344519.1	ProteinModelPortal:Q97U13	STRING:273057.SSO3213	EnsemblBacteria:AAK43309	GeneID:1453228	KEGG:sso:SSO3213	eggNOG:NOG09900	HOGENOM:HOG000270408	OMA:WPYTRDI	ProtClustDB:CLSK803639	BioCyc:SSOL273057:GCH2-2998-MONOMER
38525_638194844	Q96Y09	EMBL:BA000023	RefSeq:NP_378359.1	STRING:273063.ST2358	EnsemblBacteria:BAB67468	GeneID:1460441	KEGG:sto:ST2358	eggNOG:NOG09900	HOGENOM:HOG000270408	OMA:WPYTRDI	ProtClustDB:CLSK803639	BioCyc:STOK273063:GJC7-2577-MONOMER
38525_638197362	Q4JBI7	EMBL:CP000077	RefSeq:YP_255135.1	EnsemblBacteria:AAY79842	GeneID:3473190	KEGG:sai:Saci_0430	eggNOG:NOG09900	HOGENOM:HOG000270408	OMA:WPYTRDI	ProtClustDB:CLSK803639	BioCyc:SACI330779:GH9J-427-MONOMER
38525_638395102	S0ASS9	EMBL:CP004145	RefSeq:YP_008142000.1	GeneID:16025292
38525_639001874	A4BPQ4	EMBL:AAOF01000004	EnsemblBacteria:EAR22059	PATRIC:25482444
38525_645601871	F9ZPL4	EMBL:CP002573	RefSeq:YP_004747539.1	EnsemblBacteria:AEK56839	GeneID:10987976	KEGG:acu:Atc_0188	BioCyc:ACAL990288:GJBS-189-MONOMER
42427_642230651	U4Z0K9	EMBL:AWZO01000035
42427_642834829	U4Z0K9	EMBL:AWZO01000035
42427_642236080	C9YQB0	EMBL:FN545816	RefSeq:YP_003219254.1	EnsemblBacteria:CBE06345	GeneID:8469734	KEGG:cdl:CDR20291_2775	PATRIC:19459591	eggNOG:NOG272035	HOGENOM:HOG000109197	OMA:ERWHKKC	OrthoDB:EOG6VHZBJ	BioCyc:CDIF645463:GJP4-2855-MONOMER
42427_642839609	C9YQB0	EMBL:FN545816	RefSeq:YP_003219254.1	EnsemblBacteria:CBE06345	GeneID:8469734	KEGG:cdl:CDR20291_2775	PATRIC:19459591	eggNOG:NOG272035	HOGENOM:HOG000109197	OMA:ERWHKKC	OrthoDB:EOG6VHZBJ	BioCyc:CDIF645463:GJP4-2855-MONOMER
42427_642237294	C9YQB0	EMBL:FN545816	RefSeq:YP_003219254.1	EnsemblBacteria:CBE06345	GeneID:8469734	KEGG:cdl:CDR20291_2775	PATRIC:19459591	eggNOG:NOG272035	HOGENOM:HOG000109197	OMA:ERWHKKC	OrthoDB:EOG6VHZBJ	BioCyc:CDIF645463:GJP4-2855-MONOMER
42427_645113568	C9YQB0	EMBL:FN545816	RefSeq:YP_003219254.1	EnsemblBacteria:CBE06345	GeneID:8469734	KEGG:cdl:CDR20291_2775	PATRIC:19459591	eggNOG:NOG272035	HOGENOM:HOG000109197	OMA:ERWHKKC	OrthoDB:EOG6VHZBJ	BioCyc:CDIF645463:GJP4-2855-MONOMER
42427_642242408	C9YQB0	EMBL:FN545816	RefSeq:YP_003219254.1	EnsemblBacteria:CBE06345	GeneID:8469734	KEGG:cdl:CDR20291_2775	PATRIC:19459591	eggNOG:NOG272035	HOGENOM:HOG000109197	OMA:ERWHKKC	OrthoDB:EOG6VHZBJ	BioCyc:CDIF645463:GJP4-2855-MONOMER
42427_638872421	U3YPI5	EMBL:CAMO01000166
42427_642324920	B1C7Q0	EMBL:ABIL02000005	EnsemblBacteria:EDS73037	PATRIC:24498819
42427_642842956	U3VEI1	EMBL:CAME01000115
42427_645152115	D1ARV3	EMBL:CP001739	RefSeq:YP_003310520.1	EnsemblBacteria:ACZ10589	GeneID:8599201	KEGG:str:Sterm_3755	PATRIC:32411604	HOGENOM:HOG000109197	OMA:ERWHKKC	OrthoDB:EOG6VHZBJ	BioCyc:STER526218:GHLD-3800-MONOMER
42427_645521301	D9SNJ0	EMBL:CP002160	RefSeq:YP_003845746.1	EnsemblBacteria:ADL53982	GeneID:9611238	KEGG:ccb:Clocel_4325	PATRIC:41734772	HOGENOM:HOG000109197	OMA:ERWHKKC	BioCyc:CCEL573061:GIXD-4431-MONOMER
42427_645654005	F1TBQ3	EMBL:ACXX02000005	EnsemblBacteria:EGD48074
42427_642192109	R5RBD8	EMBL:CAZV010000165
41329_645247532	S3M062	EMBL:APUL01000062
41329_645245096	S3M062	EMBL:APUL01000062
41329_645240809	S3M062	EMBL:APUL01000062
41329_645254735	S3M062	EMBL:APUL01000062
41329_645252269	S3M062	EMBL:APUL01000062
41329_645238803	S3M062	EMBL:APUL01000062
41329_645242923	S3M062	EMBL:APUL01000062
41329_645258976	S3M062	EMBL:APUL01000062
41329_645249918	S3M062	EMBL:APUL01000062
41329_645256814	S3M062	EMBL:APUL01000062
41329_644199118	D0W4F9	EMBL:ACDY02000009	EnsemblBacteria:EEZ71285
41329_645449230	J1ERR3	EMBL:ALED01000018	EnsemblBacteria:EJH67502
41329_641059391	A5KYV3	EMBL:AAZW01000010	EnsemblBacteria:EDK29386	PATRIC:25663221
44187_641106948	A6BZ51	EMBL:ABCE01000001	EnsemblBacteria:EDL62346	PATRIC:30923290
44187_638978402	A3ZTJ1	EMBL:AANZ01000010	EnsemblBacteria:EAQ80254	PATRIC:36948637
44187_645134253	B9XJ89	EMBL:ABOX02000020	EnsemblBacteria:EEF60127	PATRIC:31327468
44187_639879749	Q0F305	EMBL:AATS01000001	PRIDE:Q0F305	EnsemblBacteria:EAU56136	PATRIC:28827487
44187_641129946	A6DKH1	EMBL:ABCK01000007	EnsemblBacteria:EDM27869	PATRIC:29243314
44187_644255731	C0W4W2	EMBL:ACFH01000059	EnsemblBacteria:EEH66216	PATRIC:24382407	OrthoDB:EOG6XQ3GN
44187_643198277	Q6A5C5	EMBL:AE017283	RefSeq:YP_056996.1	STRING:267747.PPA2334	EnsemblBacteria:AAT84038	GeneID:2931992	KEGG:pac:PPA2334	PATRIC:23039541	HOGENOM:HOG000056227	OMA:LTKGPFN	OrthoDB:EOG6XQ3GN	ProtClustDB:CLSK232060	BioCyc:PACN267747:GHO9-2344-MONOMER
44187_640313062	C4M1E4	EMBL:DS571208	RefSeq:XP_650862.1	EnsemblProtists:rna_EHI_030750-1	GeneID:3405164	KEGG:ehi:EHI_030750	EuPathDB:AmoebaDB:EHI_030750	ProtClustDB:CLSZ2730482
44187_640335810	A8BEQ2	EMBL:AACB02000014	RefSeq:XP_001707402.1	EnsemblProtists:EDO79728	GeneID:5700305	KEGG:gla:GL50803_101278	EuPathDB:GiardiaDB:GL50803_101278	OMA:LTKGPFN	ProtClustDB:CLSZ2730482
44085_644265106	D4C7R4	EMBL:ACFX02000003	EnsemblBacteria:EFE14602
44085_644177184	C0CXS4	EMBL:ACCJ01000094	EnsemblBacteria:EEG56112	PATRIC:25238171
44085_641395745	A8RDK8	EMBL:ABAW02000024	EnsemblBacteria:EDP10716	PATRIC:30664329
44085_642848219	J7SGH7	EMBL:ABKW02000003	EnsemblBacteria:EDU37806
44085_644434769	C2L1I4	EMBL:ACKX01000244	EnsemblBacteria:EEJ50133	PATRIC:28543225
44085_644139599	C9L7Z8	EMBL:ABYU02000016	EnsemblBacteria:EEX21893	PATRIC:36959029
44085_641397550	A7VS50	EMBL:ABCB02000017	EnsemblBacteria:EDO61880	PATRIC:30583496
44085_644189101	C6LIR0	EMBL:ACCL02000018	EnsemblBacteria:EET59449	PATRIC:29037534
44085_641009779	A5KMA5	EMBL:AAVP02000004	EnsemblBacteria:EDK24630	PATRIC:31171563
44085_638176456	Q8TQ75	EMBL:AE010299	RefSeq:NP_616604.1	EnsemblBacteria:AAM05084	GeneID:1473564	KEGG:mac:MA1676	eggNOG:NOG10767	OMA:NSTSTMH	ProtClustDB:CLSK900384	BioCyc:MACE188937:GI2O-1693-MONOMER
44085_638167426	Q8PT70	EMBL:AE008384	RefSeq:NP_634872.1	EnsemblBacteria:AAM32544	GeneID:1481190	KEGG:mma:MM_2848	eggNOG:NOG10767	HOGENOM:HOG000027730	OMA:NSTSTMH	ProtClustDB:CLSK900384	BioCyc:MMAZ192952:GCK2-2909-MONOMER
44085_644159199	B9Y561	EMBL:ACCF01000054	EnsemblBacteria:EEF68974	PATRIC:27540580
43578_642559547	Q1PXD2	EMBL:CT573073
43578_638176861	Q8TP55	EMBL:AE010299	RefSeq:NP_616985.1	STRING:188937.MA2063	EnsemblBacteria:AAM05465	GeneID:1473952	KEGG:mac:MA2063	eggNOG:NOG11497	OMA:PFHEKEL	ProtClustDB:CLSK450270	BioCyc:MACE188937:GI2O-2082-MONOMER
43578_638167747	Q8PSC8	EMBL:AE008384	RefSeq:NP_635175.1	STRING:192952.MM_3151	EnsemblBacteria:AAM32847	GeneID:1481493	KEGG:mma:MM_3151	eggNOG:NOG11497	HOGENOM:HOG000274047	OMA:PFHEKEL	ProtClustDB:CLSK450270	BioCyc:MMAZ192952:GCK2-3216-MONOMER
43578_639880814	Q0F011	EMBL:AATS01000005	EnsemblBacteria:EAU54873	PATRIC:28823738
43578_645602569	D5CS55	EMBL:CP001965	RefSeq:YP_003524178.1	EnsemblBacteria:ADE11791	GeneID:8892245	KEGG:slt:Slit_1558	PATRIC:35401236	HOGENOM:HOG000274047	BioCyc:SLIT580332:GH9F-1591-MONOMER
43259_645166794	D3PWK3	EMBL:CP001778	RefSeq:YP_003512318.1	EnsemblBacteria:ADD43225	GeneID:8884762	KEGG:sna:Snas_3563	PATRIC:35369440	BioCyc:SNAS446470:GHHC-3589-MONOMER	InterPro:IPR006311	PROSITE:PS51318
43259_644083290	D1A9C9	EMBL:CP001738	RefSeq:YP_003298863.1	EnsemblBacteria:ACY96825	GeneID:8602552	KEGG:tcu:Tcur_1242	PATRIC:32512071	HOGENOM:HOG000216992	OMA:DDRERIK	OrthoDB:EOG6WT8BD	BioCyc:TCUR471852:GHHD-1262-MONOMER
43259_645168762	D3PYG3	EMBL:CP001778	RefSeq:YP_003510623.1	EnsemblBacteria:ADD41530	GeneID:8883025	KEGG:sna:Snas_1834	PATRIC:35366005	HOGENOM:HOG000216992	OMA:DDRERIK	BioCyc:SNAS446470:GHHC-1852-MONOMER	InterPro:IPR006311	PROSITE:PS51318
43259_645165848	D3Q589	EMBL:CP001778	RefSeq:YP_003513231.1	EnsemblBacteria:ADD44138	GeneID:8885698	KEGG:sna:Snas_4493	PATRIC:35371287	HOGENOM:HOG000216992	OMA:FREPEGM	BioCyc:SNAS446470:GHHC-4525-MONOMER	InterPro:IPR006311	PROSITE:PS51318
43259_642987944	D5SI70	EMBL:CM000914	EnsemblBacteria:EFG03613	PATRIC:36470713
43259_645220182	M9SRB7	EMBL:CP004370	RefSeq:YP_007745681.1	EnsemblBacteria:AGI88678	GeneID:15146130	KEGG:salb:XNR_2306	InterPro:IPR006311	PROSITE:PS51318
43259_645396289	D9WKH8	EMBL:GG657754	EnsemblBacteria:EFL25712	InterPro:IPR006311	PROSITE:PS51318
43123_640633919	A3JAR5	EMBL:AAXY01000003	EnsemblBacteria:EBA00652	PATRIC:30999951	InterPro:IPR027417	SUPFAM:SSF52540
43123_639155133	Q1NS43	EMBL:AAQF01000063	EnsemblBacteria:EAT04520	PATRIC:38443489	InterPro:IPR027417	SUPFAM:SSF52540
43123_644406310	D6SJQ7	EMBL:ACJN02000001	EnsemblBacteria:EFI36110	InterPro:IPR027417	SUPFAM:SSF52540
43123_638963301	A3Z8C5	EMBL:AANP01000005	EnsemblBacteria:EAQ68742	PATRIC:29889703
43123_639094648	M4U7E9	EMBL:CP004404	RefSeq:YP_007640374.1	EnsemblBacteria:AGH81536	GeneID:14856729	KEGG:psy:PCNPT3_07990	InterPro:IPR027417	SUPFAM:SSF52540
43123_639126426	Q1VBH4	EMBL:AAPS01000006	EnsemblBacteria:EAS76855	PATRIC:29681925
43123_645579916	D9SG94	EMBL:CP002159	RefSeq:YP_003847305.1	EnsemblBacteria:ADL55541	GeneID:9612867	KEGG:gca:Galf_1522	PATRIC:42339666	HOGENOM:HOG000291035	BioCyc:GCAP395494:GHXI-1557-MONOMER	InterPro:IPR027417	SUPFAM:SSF52540
47158_644142301	B9ADF2	EMBL:ABYW01000005	EnsemblBacteria:EEE41492
47158_644141541	D2ZR69	EMBL:ABYV02000006	EnsemblBacteria:EFC93766
47158_644141538	D2ZR66	EMBL:ABYV02000006	EnsemblBacteria:EFC93763
47158_644142304	D2ZR66	EMBL:ABYV02000006	EnsemblBacteria:EFC93763
47158_638155030	O26612	EMBL:AE000666	PIR:E69167	RefSeq:NP_275655.1	STRING:187420.MTH512	EnsemblBacteria:AAB85018	GeneID:1470473	KEGG:mth:MTH512	eggNOG:NOG72134	OMA:IPVSCTE	ProtClustDB:CLSK797918	BioCyc:MTHE187420:GJNM-512-MONOMER
47158_641098627	A7BWX4	EMBL:ABBZ01000629	EnsemblBacteria:EDN68961
47158_638985330	A4AD44	EMBL:AAOA01000016	EnsemblBacteria:EAQ96097	PATRIC:29066089
46999_638922762	A3WZQ2	EMBL:AAMY01000020	EnsemblBacteria:EAQ34533	PATRIC:25479479
46999_640010913	A0Y975	EMBL:AAVT01000001	EnsemblBacteria:EAW32679	PATRIC:25932459
46999_637780043	Q39RZ8	EMBL:CP000148	RefSeq:YP_006721714.1	STRING:269799.Gmet_2758	EnsemblBacteria:ABB32976	GeneID:3740238	KEGG:gme:Gmet_2758	PATRIC:22004766	eggNOG:NOG76118	HOGENOM:HOG000295882	OMA:WAYDSRK	OrthoDB:EOG6CGCD1	ProtClustDB:CLSK891921	BioCyc:GMET269799:GHNY-2796-MONOMER
46999_640653608	A4EY87	EMBL:AAYC01000011	EnsemblBacteria:EBA15355	PATRIC:28123055
46999_639875166	Q0FFW2	EMBL:AATR01000001	EnsemblBacteria:EAU52877	PATRIC:28469146
46207_639206521	Q0YPW6	EMBL:AASE01000022	EnsemblBacteria:EAT58363	PATRIC:27059617
46207_638177091	Q8TNJ7	EMBL:AE010299	RefSeq:NP_617201.1	EnsemblBacteria:AAM05681	GeneID:1474177	KEGG:mac:MA2288	eggNOG:NOG29416	OMA:NTYYDMK	ProtClustDB:CLSK568901	BioCyc:MACE188937:GI2O-2308-MONOMER
46207_639158096	Q1NIS8	EMBL:AAQF01000438	EMBL:AAQF01000015	EnsemblBacteria:EAT01605	EnsemblBacteria:EAT05944	PATRIC:38440619
46207_639153706	Q1NIS8	EMBL:AAQF01000438	EMBL:AAQF01000015	EnsemblBacteria:EAT01605	EnsemblBacteria:EAT05944	PATRIC:38440619
46035_640408216	A2QWT0	EMBL:AM270241	ProteinModelPortal:A2QWT0	EnsemblFungi:CADANGAT00008962	HOGENOM:HOG000234861	OrthoDB:EOG7DJSVN	GO:GO:0003824	GO:GO:0008152	InterPro:IPR008928	SUPFAM:SSF48208
46035_643123317	I9G2S6	EMBL:AGXI01000004	ProteinModelPortal:I9G2S6	EnsemblBacteria:EIY40624	GO:GO:0003824	GO:GO:0008152	InterPro:IPR008928	SUPFAM:SSF48208
46035_641380581	A7LQT9	EMBL:AAXF02000027	ProteinModelPortal:A7LQT9	EnsemblBacteria:EDO14113	PATRIC:27038526	GO:GO:0003824	GO:GO:0008152	InterPro:IPR008928	SUPFAM:SSF48208
46035_644167705	E2NEZ8	EMBL:ACCH01000206	EnsemblBacteria:EEF89490	PATRIC:26973890	GO:GO:0003824	GO:GO:0008152	InterPro:IPR008928	SUPFAM:SSF48208
46035_643095876	B7AE24	EMBL:ABVO01000008	ProteinModelPortal:B7AE24	EnsemblBacteria:EEC55023	PATRIC:27003945	GO:GO:0003824	GO:GO:0008152	InterPro:IPR008928	SUPFAM:SSF48208
45372_645112488	U4Z514	EMBL:AWZN01000029
45372_642231631	U4Z514	EMBL:AWZN01000029
45372_642837952	U4Z514	EMBL:AWZN01000029
45372_642234840	U4Z514	EMBL:AWZN01000029
45372_642833306	U4Z514	EMBL:AWZN01000029
45372_642237807	U4Z514	EMBL:AWZN01000029
45372_642242769	U4Z514	EMBL:AWZN01000029
45372_638871191	U4Z514	EMBL:AWZN01000029
45372_642841463	U3VAY9	EMBL:CAME01000028
45372_645611144	C6PNS6	EMBL:ACVI01000005	EMBL:GG770685	EnsemblBacteria:EET89004	EnsemblBacteria:EFG88442	PATRIC:26463573	Gene3D:1.25.10.10	InterPro:IPR011989	InterPro:IPR016024	SUPFAM:SSF48371
45372_644209928	C0EJ39	EMBL:ACEC01000136	EnsemblBacteria:EEG28504	PATRIC:30592744	Gene3D:1.25.10.10	InterPro:IPR011989	InterPro:IPR016024	SUPFAM:SSF48371
45372_644187135	C6LK26	EMBL:ACCL02000022	EnsemblBacteria:EET59104	PATRIC:29038360	Gene3D:1.25.10.10	InterPro:IPR011989	InterPro:IPR016024	SUPFAM:SSF48371
45372_644161827	B9YCL0	EMBL:ACCF01000224	EnsemblBacteria:EEF66304	PATRIC:27545004	Gene3D:1.25.10.10	InterPro:IPR011989	InterPro:IPR016024	SUPFAM:SSF48371
45225_645389154	D9VSQ6	EMBL:GG657750	EnsemblBacteria:EFL18857
45225_644057557	D3PQ58	EMBL:CP001743	EMBL:CP005385	RefSeq:YP_003506704.1	RefSeq:YP_007879646.1	EnsemblBacteria:ADD27684	EnsemblBacteria:AGK04149	GeneID:15335459	GeneID:8879006	KEGG:mrb:Mrub_0919	KEGG:mre:K649_04235	PATRIC:35357970	HOGENOM:HOG000018860	OMA:GLGGWMF	BioCyc:MRUB504728:GI6U-940-MONOMER
45225_638177089	Q8TNJ8	EMBL:AE010299	RefSeq:NP_617200.1	EnsemblBacteria:AAM05680	GeneID:1474176	KEGG:mac:MA2287	eggNOG:NOG10447	OMA:GLGGWMF	ProtClustDB:CLSK568900	BioCyc:MACE188937:GI2O-2307-MONOMER
45225_638167504	Q8PT02	EMBL:AE008384	RefSeq:NP_634945.1	EnsemblBacteria:AAM32617	GeneID:1481263	KEGG:mma:MM_2921	eggNOG:NOG10447	HOGENOM:HOG000018860	OMA:GLGGWMF	ProtClustDB:CLSK568900	BioCyc:MMAZ192952:GCK2-2982-MONOMER
50130_637779008	Q39UX0	EMBL:CP000148	RefSeq:YP_006720690.1	STRING:269799.Gmet_1723	EnsemblBacteria:ABB31954	GeneID:3741399	KEGG:gme:Gmet_1723	PATRIC:22002680	eggNOG:NOG82728	HOGENOM:HOG000011258	OMA:IACPPDA	OrthoDB:EOG6D8B97	ProtClustDB:CLSK941285	BioCyc:GMET269799:GHNY-1750-MONOMER
50130_637780585	Q39QG6	EMBL:CP000148	RefSeq:YP_006722249.1	STRING:269799.Gmet_3295	EnsemblBacteria:ABB33508	GeneID:3739386	KEGG:gme:Gmet_3295	PATRIC:22005862	eggNOG:NOG82728	HOGENOM:HOG000011258	OMA:DYPCKSA	OrthoDB:EOG6D8B97	ProtClustDB:CLSK941285	BioCyc:GMET269799:GHNY-3343-MONOMER
50130_645533949	E8WNV4	EMBL:CP002479	RefSeq:YP_004198026.1	EnsemblBacteria:ADW12750	GeneID:10196874	KEGG:geb:GM18_1281	PATRIC:46946473	HOGENOM:HOG000011258	OMA:DYPCKSA	BioCyc:GSP443143:GHZL-1314-MONOMER
50130_645656229	F1TDE7	EMBL:ACXX02000007	EnsemblBacteria:EGD47585
50130_642205850	B0PCE3	EMBL:ABGD02000019	EnsemblBacteria:EDS10898	PATRIC:24514641
50130_644167170	I9ELG4	EMBL:AGXG01000120	EnsemblBacteria:EIY21039
50130_644405869	D6SMS2	EMBL:ACJN02000001	EnsemblBacteria:EFI35983
50036_638173230	Q8U2X5	EMBL:AE009950	RefSeq:NP_578432.1	STRING:186497.PF0703	PRIDE:Q8U2X5	EnsemblBacteria:AAL80827	GeneID:1468551	KEGG:pfu:PF0703	eggNOG:NOG08052	HOGENOM:HOG000228110	OMA:ISKGRTC	ProtClustDB:CLSK555323
50036_638177551	Q8TMD2	EMBL:AE010299	RefSeq:NP_617626.1	STRING:188937.MA2727	EnsemblBacteria:AAM06106	GeneID:1474620	KEGG:mac:MA2727	eggNOG:NOG08052	OMA:ISKGRTC	ProtClustDB:CLSK555323	BioCyc:MACE188937:GI2O-2757-MONOMER
50036_641127499	A6DDK9	EMBL:ABCJ01000006	EnsemblBacteria:EDM23399	PATRIC:30459695
49115_641416416	D2BG81	EMBL:CP001827	RefSeq:YP_003329659.1	EnsemblBacteria:ACZ61331	GeneID:8657112	KEGG:dev:DhcVS_158	PATRIC:32057250	HOGENOM:HOG000245056	OMA:NEFPDYY	OrthoDB:EOG6GXTVT	BioCyc:DSP311424:GJ8J-153-MONOMER
49115_638167296	Q8PTJ4	EMBL:AE008384	RefSeq:NP_634745.1	EnsemblBacteria:AAM32417	GeneID:1481063	KEGG:mma:MM_2721	eggNOG:NOG06480	HOGENOM:HOG000245056	OMA:NEFPDYY	ProtClustDB:CLSK881041	BioCyc:MMAZ192952:GCK2-2782-MONOMER
49115_645576738	C5UUI7	EMBL:ACSC01000002	EnsemblBacteria:EES49321	PATRIC:26433815
49115_645614055	C6PX27	EMBL:ACVI01000061	EMBL:GG770685	EnsemblBacteria:EET86204	EnsemblBacteria:EFG88261	PATRIC:26469326
49115_642095559	C4IGP1	EMBL:ACOM01000005	EnsemblBacteria:EEP53422	PATRIC:26459259
49115_645508712	C4IGP1	EMBL:ACOM01000005	EnsemblBacteria:EEP53422	PATRIC:26459259
48816_639206438	Q0YQ47	EMBL:AASE01000020	EnsemblBacteria:EAT58424	PATRIC:27059425
48816_638193198	Q973H6	EMBL:BA000023	RefSeq:NP_376828.1	STRING:273063.ST0925	EnsemblBacteria:BAB65937	GeneID:1458887	KEGG:sto:ST0925	eggNOG:NOG238855	OMA:QWKISIH	ProtClustDB:CLSK2752156	BioCyc:STOK273063:GJC7-1024-MONOMER
48717_645169118	D3PVD1	EMBL:CP001778	RefSeq:YP_003510277.1	EnsemblBacteria:ADD41184	GeneID:8882668	KEGG:sna:Snas_1480	PATRIC:35365295	HOGENOM:HOG000033644	OMA:TYSHWNG	BioCyc:SNAS446470:GHHC-1495-MONOMER
48717_645208503	D6A455	EMBL:DS999641	EnsemblBacteria:EFE71609	PATRIC:25327365
48717_645422683	D9XN11	EMBL:GG657758	EnsemblBacteria:EFL43360
48717_645383372	D9VM73	EMBL:GG657750	EnsemblBacteria:EFL13229
48717_645221238	M9SNI8	EMBL:CP004370	RefSeq:YP_007744671.1	EnsemblBacteria:AGI87668	GeneID:15145103	KEGG:salb:XNR_1279
48717_638882881	A3TS54	EMBL:AAMN01000007	EnsemblBacteria:EAP96940	PATRIC:27565974
48717_642985339	B5GMZ2	EMBL:DS570627	EnsemblBacteria:EDY47688	PATRIC:29742608
48473_642807999	B5GKK3	EMBL:GG770539	EnsemblBacteria:EDY46849	Gene3D:3.10.490.10	InterPro:IPR013024
48473_644083743	D1ACX3	EMBL:CP001738	RefSeq:YP_003299500.1	EnsemblBacteria:ACY97462	GeneID:8603219	KEGG:tcu:Tcur_1892	PATRIC:32513416	HOGENOM:HOG000035727	OMA:GGMAFYD	OrthoDB:EOG6KQ6HR	BioCyc:TCUR471852:GHHD-1929-MONOMER
48473_642987044	B5GT38	EMBL:DS570641	EMBL:CM000913	EnsemblBacteria:EDY49484	EnsemblBacteria:EFG08188	PATRIC:29745745
47817_640620787	A3I8R3	EMBL:AAXV01000008	EnsemblBacteria:EAZ86144	PATRIC:25221140
47817_642985017	B5GLY1	EMBL:DS570625	EMBL:CM000914	EnsemblBacteria:EDY47327	EnsemblBacteria:EFG04986	PATRIC:29741990
47817_643926624	C5F303	EMBL:CP002391	RefSeq:YP_008446451.1	EnsemblBacteria:EEQ65164	GeneID:16640035	PATRIC:26509811	OrthoDB:EOG680X53
47817_644449793	C2M2Q1	EMBL:ACLQ01000006	EnsemblBacteria:EEK15451	PATRIC:30363626
47817_643195427	E2N2R1	EMBL:ABZV01000007	EnsemblBacteria:EEB65756	PATRIC:30379426
47817_640615919	A3HV11	EMBL:AAXU02000001	EnsemblBacteria:EAZ81983
47817_645166811	D3PWI6	EMBL:CP001778	RefSeq:YP_003512301.1	EnsemblBacteria:ADD43208	GeneID:8884745	KEGG:sna:Snas_3546	PATRIC:35369410	HOGENOM:HOG000292991	OMA:TIAINKC	BioCyc:SNAS446470:GHHC-3572-MONOMER
53884_641390215	A7V9A2	EMBL:AAYH02000048	EnsemblBacteria:EDO52558	PATRIC:27180504
53616_640985680	Q83BC2	EMBL:AE016828	RefSeq:NP_820572.1	STRING:227377.CBU_1589	EnsemblBacteria:AAO91086	GeneID:1209499	KEGG:cbu:CBU_1589	PATRIC:17931943	HOGENOM:HOG000278543	OMA:NCCKCIC	OrthoDB:EOG6S26HX	ProtClustDB:CLSK914885	BioCyc:CBUR227377:GJ7S-1568-MONOMER
53616_641810869	Q83BC2	EMBL:AE016828	RefSeq:NP_820572.1	STRING:227377.CBU_1589	EnsemblBacteria:AAO91086	GeneID:1209499	KEGG:cbu:CBU_1589	PATRIC:17931943	HOGENOM:HOG000278543	OMA:NCCKCIC	OrthoDB:EOG6S26HX	ProtClustDB:CLSK914885	BioCyc:CBUR227377:GJ7S-1568-MONOMER
53616_641442838	A8UWC2	EMBL:ABHJ01000007	EnsemblBacteria:EDP75027	PATRIC:38514222
53341_645554522	D0KQD5	EMBL:CP001800	RefSeq:YP_005642601.1	EnsemblBacteria:ACX91000	GeneID:12258124	KEGG:sol:Ssol_0745	HOGENOM:HOG000108023	OMA:VHDSIAR	BioCyc:SSOL555311:GLLY-746-MONOMER
53341_638198742	Q4J7U3	EMBL:CP000077	RefSeq:YP_256432.1	STRING:330779.Saci_1833	EnsemblBacteria:AAY81139	GeneID:3474321	KEGG:sai:Saci_1833	eggNOG:NOG80361	HOGENOM:HOG000108023	OMA:VHDSIAR	ProtClustDB:CLSK883855	BioCyc:SACI330779:GH9J-1802-MONOMER
53341_638164156	Q97UQ3	EMBL:AE006641	PIR:H90474	RefSeq:NP_344265.1	ProteinModelPortal:Q97UQ3	STRING:273057.SSO2953	EnsemblBacteria:AAK43055	GeneID:1452974	KEGG:sso:SSO2953	eggNOG:NOG80361	HOGENOM:HOG000108023	OMA:VHDSIAR	ProtClustDB:CLSK883855	BioCyc:SSOL273057:GCH2-2742-MONOMER
57608_644177699	C0CZ88	EMBL:ACCJ01000137	EnsemblBacteria:EEG55623	PATRIC:25239027	InterPro:IPR008929	SUPFAM:SSF48230
57608_645163002	D2QL33	EMBL:CP001769	RefSeq:YP_003386071.1	EnsemblBacteria:ADB37272	GeneID:8724955	KEGG:sli:Slin_1222	PATRIC:32432341	HOGENOM:HOG000087892	OMA:NHRWKIC	BioCyc:SLIN504472:GHKB-1227-MONOMER	InterPro:IPR008930	SUPFAM:SSF48239
57608_642873455	D3EKX6	EMBL:CP001793	RefSeq:YP_003243720.1	EnsemblBacteria:ACX65913	GeneID:8517862	KEGG:gym:GYMC10_3678	PATRIC:32155883	HOGENOM:HOG000049645	OMA:CHTPNHR	OrthoDB:EOG60CWJJ	BioCyc:PSP481743:GH8K-3725-MONOMER	InterPro:IPR008930	SUPFAM:SSF48239
57608_645396562	D9WQ15	EMBL:GG657754	EnsemblBacteria:EFL25975	InterPro:IPR006311	PROSITE:PS51318
57608_640288037	Q2KEH7	EMBL:CM000230	ProteinModelPortal:Q2KEH7
57608_645415317	D9XEN3	EMBL:GG657757	EnsemblBacteria:EFL36831
57598_644532641	C2TQQ9	EMBL:ACMF01000167	EnsemblBacteria:EEL13884
57598_642407331	B1EPA0	EMBL:ABKX01000008	EnsemblBacteria:EDS91127	PATRIC:30325350
57598_638394395	S0AQE6	EMBL:CP004145	RefSeq:YP_008141290.1	GeneID:16024559
57319_643320452	Q2TXS6	EMBL:AP007175	ProteinModelPortal:Q2TXS6	EnsemblFungi:CADAORAT00004147	HOGENOM:HOG000217652	OrthoDB:EOG7RJQ0V
57319_640403229	A2QF50	EMBL:AM270038	EnsemblFungi:CADANGAT00002856	HOGENOM:HOG000217652	OrthoDB:EOG7RJQ0V
57319_638936465	A3XLC7	EMBL:AANC01000004	EnsemblBacteria:EAQ49645	PATRIC:29229502
57319_645550711	E8RP39	EMBL:CP002395	RefSeq:YP_004087160.1	EnsemblBacteria:ADU13009	GeneID:10052903	KEGG:aex:Astex_1337	PATRIC:45150633	HOGENOM:HOG000217652	BioCyc:AEXC573065:GJ7A-1354-MONOMER
56523_642791972	A5KSQ1	EMBL:AAXS01000067	EnsemblBacteria:EDK72534	PATRIC:25900576
56523_644382415	L9V9G9	EMBL:AOHS01000009	EnsemblBacteria:ELY33611
56233_645508731	N9Z997	EMBL:AGYK01000001	EnsemblBacteria:ENZ36446
56233_642095576	N9Z997	EMBL:AGYK01000001	EnsemblBacteria:ENZ36446
56233_640621174	A3I9T8	EMBL:AAXV01000011	EnsemblBacteria:EAZ85677	PATRIC:25221901
56233_642913632	B4DBM2	EMBL:ABVL01000038	EnsemblBacteria:EDY16209	PATRIC:27083660
56233_645157642	D1C5K8	EMBL:CP001823	RefSeq:YP_003318346.1	EnsemblBacteria:ACZ37524	GeneID:8637457	KEGG:sti:Sthe_0085	HOGENOM:HOG000065330	OMA:KNRSGLN	OrthoDB:EOG657JH8	BioCyc:STHE479434:GHJN-85-MONOMER
56233_641112828	A6CFT5	EMBL:ABCE01000061	EnsemblBacteria:EDL56437	PATRIC:30934968
55497_643303061	B7XQR0	EMBL:ABGB01001417	RefSeq:XP_002652338.1	GeneID:8644066	EuPathDB:MicrosporidiaDB:EBI_21876
55497_645266386	F2ZPB9	EMBL:ABZR01000653	EnsemblBacteria:EGI04272
54803_645604151	D5CNA0	EMBL:CP001965	RefSeq:YP_003525184.1	EnsemblBacteria:ADE12797	GeneID:8893277	KEGG:slt:Slit_2572	PATRIC:35403274	HOGENOM:HOG000252044	BioCyc:SLIT580332:GH9F-2623-MONOMER
54803_645160978	D2QI21	EMBL:CP001769	RefSeq:YP_003385708.1	EnsemblBacteria:ADB36909	GeneID:8724582	KEGG:sli:Slin_0852	PATRIC:32431599	HOGENOM:HOG000252044	OMA:IHADYTH	BioCyc:SLIN504472:GHKB-854-MONOMER
54803_638908253	E0TGL3	EMBL:CP002156	RefSeq:YP_003855287.1	EnsemblBacteria:ADM10145	GeneID:9710311	KEGG:pbr:PB2503_10469	PATRIC:42428220	HOGENOM:HOG000252044	OMA:IHADYTH	BioCyc:PBER314260:GI0G-1998-MONOMER
54803_641118385	A5P8B5	EMBL:ABCG01000001	EnsemblBacteria:EDL50566	PATRIC:30320381
54803_638914808	A3WCK8	EMBL:AAMW01000001	EnsemblBacteria:EAQ30063	PATRIC:30314608
54722_642832866	U4Z6E3	EMBL:AWZO01000029
54722_642232290	U4DB23	EMBL:CAND01000058
54722_642841899	U3UZ40	EMBL:CAMD01000007
54722_645152738	D1AM14	EMBL:CP001739	RefSeq:YP_003307213.1	EnsemblBacteria:ACZ07282	GeneID:8595893	KEGG:str:Sterm_0400	PATRIC:32404710	HOGENOM:HOG000109224	OMA:DWISKMT	OrthoDB:EOG67X1TW	BioCyc:STER526218:GHLD-407-MONOMER
54722_642811684	B3CBI6	EMBL:ABJL02000008	EnsemblBacteria:EDV04438	PATRIC:27034984	InterPro:IPR006626	SMART:SM00710
54722_645168891	D3PXE1	EMBL:CP001778	RefSeq:YP_003510497.1	EnsemblBacteria:ADD41404	GeneID:8882895	KEGG:sna:Snas_1705	PATRIC:35365733	HOGENOM:HOG000109224	OMA:DWISKMT	BioCyc:SNAS446470:GHHC-1722-MONOMER
54702_641416032	D2BJP5	EMBL:CP001827	RefSeq:YP_003330873.1	EnsemblBacteria:ACZ62545	GeneID:8658372	KEGG:dev:DhcVS_1447	PATRIC:32059811	HOGENOM:HOG000275169	OMA:PMLHEMA	OrthoDB:EOG69977B	BioCyc:DSP311424:GJ8J-1414-MONOMER
54702_644432900	C2KW97	EMBL:ACKX01000080	EnsemblBacteria:EEJ51943	PATRIC:28540016
54702_644191169	E6M5D6	EMBL:AEPZ01000010	EnsemblBacteria:EFU81684	PATRIC:45122114
54702_644274082	G4Q8Z4	EMBL:CP003058	RefSeq:YP_004895832.1	EnsemblBacteria:AEQ21692	GeneID:11265250	KEGG:ain:Acin_0450	BioCyc:AINT568816:GHMB-449-MONOMER
54702_642195001	B0NH08	EMBL:ABFY02000036	EnsemblBacteria:EDS06095	PATRIC:27230869
54702_644432069	C2KTX3	EMBL:ACKW01000055	EnsemblBacteria:EEJ52929	PATRIC:37053443
54702_644252806	B9CN73	EMBL:ACFE01000003	EnsemblBacteria:EEE16978	PATRIC:24553679	OrthoDB:EOG69977B
63137_640014200	A0YIH0	EMBL:AAVU01000001	EnsemblBacteria:EAW39316	PATRIC:30985733	OMA:WLPQTFL
63137_642886573	E0UBU7	EMBL:CP002198	RefSeq:YP_003888437.1	EnsemblBacteria:ADN15162	GeneID:9739701	KEGG:cyj:Cyan7822_3210	PATRIC:42287227	HOGENOM:HOG000253697	OMA:WLPQTFL	BioCyc:CSP497965:GJAC-3248-MONOMER
63137_640027716	A0ZLS2	EMBL:AAVW01000106	EnsemblBacteria:EAW43142	PATRIC:25522595
63137_644380686	D3SYD4	EMBL:CP001932	EMBL:AOHS01000029	RefSeq:YP_003480667.1	EnsemblBacteria:ADD06105	EnsemblBacteria:ELY30898	GeneID:8825400	KEGG:nmg:Nmag_2545	HOGENOM:HOG000253697	OMA:WLPQTFL	BioCyc:NMAG547559:GJAP-2586-MONOMER
63114_645607680	L0IKV8	EMBL:CP003066	RefSeq:YP_007298314.1	EnsemblBacteria:AGB18617	GeneID:14391182	KEGG:tto:Thethe_00954
63114_645561679	F8DVQ9	EMBL:CP002850	RefSeq:YP_005620700.1	EnsemblBacteria:AEH62249	GeneID:12280325	KEGG:zmm:Zmob_0402	OMA:TSPTRII	BioCyc:ZMOB555217:GLMZ-419-MONOMER
62952_640373908	Q7SA52	EMBL:AABX02000036	RefSeq:XP_962468.1	UniGene:Ncr.11330	EnsemblFungi:EFNCRT00000007149	GeneID:3878616	KEGG:ncr:NCU07310	eggNOG:NOG121803	HOGENOM:HOG000217021	OMA:PPWTWPV	OrthoDB:EOG76X6C2
62850_643303257	G0JZ07	EMBL:CP002986	RefSeq:YP_004793571.1	EnsemblBacteria:AEM52345	GeneID:11047801	KEGG:buj:BurJV3_3027	BioCyc:SMAL868597:GHCG-3099-MONOMER
62850_641737285	G7TH80	EMBL:CP003057	RefSeq:YP_005627635.1	EnsemblBacteria:AEQ95468	GeneID:12271673	KEGG:xor:XOC_1281	BioCyc:XORY383407:GLMS-1227-MONOMER
62764_638155474	O27027	EMBL:AE000666	PIR:E69226	RefSeq:NP_276081.1	STRING:187420.MTH944	EnsemblBacteria:AAB85442	GeneID:1471352	KEGG:mth:MTH944	eggNOG:NOG12035	OMA:RWYEYAL	ProtClustDB:CLSK798041	BioCyc:MTHE187420:GJNM-946-MONOMER
62764_638173246	Q8U2W0	EMBL:AE009950	RefSeq:NP_578447.1	ProteinModelPortal:Q8U2W0	STRING:186497.PF0718	PRIDE:Q8U2W0	EnsemblBacteria:AAL80842	GeneID:1468567	KEGG:pfu:PF0718	eggNOG:NOG12035	HOGENOM:HOG000275374	OMA:RWYEYAL	ProtClustDB:CLSK798041
62764_641417220	D2BHK5	EMBL:CP001827	RefSeq:YP_003330133.1	ProteinModelPortal:D2BHK5	EnsemblBacteria:ACZ61805	GeneID:8657601	KEGG:dev:DhcVS_668	PATRIC:32058232	HOGENOM:HOG000275374	OMA:RWYEYAL	OrthoDB:EOG6SR8ZT	BioCyc:DSP311424:GJ8J-643-MONOMER
62764_642791976	A5KSQ5	EMBL:AAXS01000068	ProteinModelPortal:A5KSQ5	EnsemblBacteria:EDK72530	PATRIC:25900585
61912_639055944	Q2BRC4	EMBL:AAOW01000001	EnsemblBacteria:EAR62902	PATRIC:25473755
61912_642111807	B1RT75	EMBL:ABDY01000025	EnsemblBacteria:EDT77349	PATRIC:27218418
61912_644621828	C3AX23	EMBL:ACMV01000526	EnsemblBacteria:EEM01808	PATRIC:25178573
61912_644194270	E0WKU5	EMBL:FR667693	RefSeq:YP_003877948.1	RefSeq:YP_003877964.1	GeneID:9728421	GeneID:9728430
61423_638160117	Q9HQ60	EMBL:AE004437	PIR:E84286	RefSeq:NP_280177.1	STRING:64091.VNG1314H	EnsemblBacteria:AAG19657	GeneID:1447957	KEGG:hal:VNG1314H	eggNOG:NOG71075	OMA:DAEHAHW	ProtClustDB:CLSK555373
61423_644029535	E4NW44	EMBL:CP001693	EMBL:AOHT01000004	RefSeq:YP_004044620.1	EnsemblBacteria:ADQ69264	EnsemblBacteria:ELY31562	GeneID:9989560	KEGG:hbo:Hbor_39500	HOGENOM:HOG000239508	OMA:DAEHAHW	BioCyc:HBOR469382:GCNS-3745-MONOMER
61423_638181966	Q5V5C7	EMBL:AY596297	RefSeq:YP_134981.1	STRING:272569.rrnAC0216	EnsemblBacteria:AAV45275	GeneID:3129828	KEGG:hma:rrnAC0216	eggNOG:NOG71075	HOGENOM:HOG000239508	OMA:DAEHAHW	ProtClustDB:CLSK555373	BioCyc:HMAR272569:GJDH-194-MONOMER
61371_640238159	E6XQJ6	EMBL:CP002457	RefSeq:YP_006010351.1	EnsemblBacteria:ADV54885	GeneID:12605699	KEGG:shp:Sput200_2437	BioCyc:SPUT399804:GLK4-2509-MONOMER
60969_645104997	B7X110	EMBL:AAUJ02000001	EnsemblBacteria:EED68341	EnsemblBacteria:EED68404	PATRIC:29058009
60969_645105060	B7X110	EMBL:AAUJ02000001	EnsemblBacteria:EED68341	EnsemblBacteria:EED68404	PATRIC:29058009
60969_642180383	B5QCY6	EMBL:ABFH02000002	EnsemblBacteria:EDZ00668	PATRIC:25786570
60969_645285743	H1RCZ4	EMBL:AHIK01000012	EnsemblBacteria:EHP19636
60969_642124332	Q5G8X8	EMBL:AY736146	RefSeq:YP_224149.1	GeneID:3342529	ProtClustDB:CLSP2493692
60969_642342785	B2Q3I5	EMBL:ABJD02000101	EnsemblBacteria:EDU58731	PATRIC:25540635
60969_642158756	K0Q7Y0	EMBL:AJMN01000063	EnsemblBacteria:EIW96003
60969_643110723	D2ZDZ1	EMBL:ABWM02000009	EnsemblBacteria:EFC56377	PATRIC:29278190
60651_645340116	C4UP55	EMBL:ACCC01000072	EnsemblBacteria:EEP97564	PATRIC:31315648	GO:GO:0008080	Gene3D:3.40.630.30	InterPro:IPR016181	InterPro:IPR000182	SUPFAM:SSF55729	PROSITE:PS51186
60651_643920788	C5ZW54	EMBL:CM000776	EMBL:DS990369	EnsemblBacteria:EES88875	EnsemblBacteria:EFR48818	Gene3D:3.40.630.30	InterPro:IPR016181	SUPFAM:SSF55729
60651_640980176	A5KFL6	EMBL:AASY01000003	EnsemblBacteria:EDK22613	PATRIC:27756988
60651_638470518	Q4HS16	EMBL:AAFJ01000003	EnsemblBacteria:EAL53551	PATRIC:27775573
60651_644152575	D1PMZ1	EMBL:ACBY02000023	EnsemblBacteria:EFB75926	InterPro:IPR016181	SUPFAM:SSF55729
59974_639096133	Q1Z9N1	EMBL:AAPH01000001	EnsemblBacteria:EAS45811	PATRIC:30913281
59974_641058254	A5KVL7	EMBL:AAZW01000003	EnsemblBacteria:EDK30363	PATRIC:25660987
59974_638896110	A3UUH9	EMBL:AAMR01000023	EnsemblBacteria:EAP93780	PATRIC:25652956
59974_638946771	A3YG09	EMBL:AANE01000016	EnsemblBacteria:EAQ63905	PATRIC:28822100
59974_640223257	A1ZTM6	EMBL:AAWS01000036	EnsemblBacteria:EAY26286	PATRIC:26281067
59974_644029581	E4NWR0	EMBL:CP001694	EMBL:AOHT01000040	RefSeq:YP_004038427.1	EnsemblBacteria:ADQ69480	EnsemblBacteria:ELY26192	GeneID:9989406	KEGG:hbo:Hbor_37740	OMA:CAERNAG	BioCyc:HBOR469382:GCNS-3961-MONOMER
59974_645167965	D3Q4G6	EMBL:CP001778	RefSeq:YP_003509219.1	EnsemblBacteria:ADD40126	GeneID:8881591	KEGG:sna:Snas_0409	PATRIC:35363158	OMA:ILPAYPW	BioCyc:SNAS446470:GHHC-418-MONOMER
58918_638887569	A3U5D6	EMBL:CP002046	RefSeq:YP_003715130.1	EnsemblBacteria:EAP87453	GeneID:9295849	KEGG:cat:CA2559_01820	PATRIC:38156284	HOGENOM:HOG000251690	OMA:LIGANND	ProtClustDB:CLSK2788036	BioCyc:CATL216432:GHTE-374-MONOMER	InterPro:IPR011050	SUPFAM:SSF51126
58918_644421273	D7W509	EMBL:ACKQ02000007	EnsemblBacteria:EFK35198
58918_644106258	C0BLD4	EMBL:ABVW01000001	ProteinModelPortal:C0BLD4	EnsemblBacteria:EEG43567	PATRIC:27394725
58918_640631488	A3J3V8	EMBL:AAXX01000002	EnsemblBacteria:EAZ95345	PATRIC:27382325	InterPro:IPR011050	SUPFAM:SSF51126
58918_638989494	A4APU7	EMBL:CP002157	RefSeq:YP_003862299.1	EnsemblBacteria:EAR03019	GeneID:9719021	KEGG:fbc:FB2170_07010	PATRIC:42332845	OMA:FGMEIEA	BioCyc:MSP313603:GH3X-1667-MONOMER
58918_638928945	A2TXW8	EMBL:CP004349	RefSeq:YP_007671901.1	ProteinModelPortal:A2TXW8	EnsemblBacteria:EAQ42952	GeneID:7748844	KEGG:pom:MED152_09520	PATRIC:31153826	InterPro:IPR011050	SUPFAM:SSF51126
58918_641457959	A9DKX5	EMBL:ABIB01000001	EnsemblBacteria:EDP98424	PATRIC:30131749	InterPro:IPR006626	InterPro:IPR011050	SMART:SM00710	SUPFAM:SSF51126
58918_641438403	A8UEX3	EMBL:ABHI01000001	ProteinModelPortal:A8UEX3	EnsemblBacteria:EDP72536	PATRIC:27398619	InterPro:IPR006626	InterPro:IPR011050	SMART:SM00710	SUPFAM:SSF51126
58918_638934884	A3XHN2	EMBL:AANC01000001	EnsemblBacteria:EAQ51211	PATRIC:29231248	InterPro:IPR011050	SUPFAM:SSF51126
58433_641970736	N0AGY4	EMBL:CP004096	RefSeq:YP_007922093.1	EnsemblBacteria:AGK49933	GeneID:15398806	GO:GO:0008168
58433_643312923	Q2UIN5	EMBL:AP007155	EnsemblFungi:CADAORAT00002045	HOGENOM:HOG000129967	OMA:RWAIVNI	OrthoDB:EOG7QNVX8
58433_640281212	G4NCB4	EMBL:CM001235	RefSeq:XP_003718647.1	EnsemblFungi:MGG_14686T0	GeneID:5048814	KEGG:mgr:MGG_14686	OrthoDB:EOG7QNVX8
58433_641938523	S5NQV7	EMBL:CP006469	RefSeq:YP_008327914.1	GeneID:16882395
58433_641947091	Q63M16	EMBL:BX571966	RefSeq:YP_110855.1	STRING:272560.BPSS0844	EnsemblBacteria:CAH38306	GeneID:3096187	KEGG:bps:BPSS0844	PATRIC:19269532	HOGENOM:HOG000187209	OMA:RPETYDR	OrthoDB:EOG62K1T9	ProtClustDB:CLSK786775	BioCyc:BPSE272560:GJNI-4399-MONOMER
58433_643311104	Q2UNS6	EMBL:AP007154	EnsemblFungi:CADAORAT00000226	HOGENOM:HOG000129967	OMA:NIDDEQW	OrthoDB:EOG7QNVX8
58433_641159030	A6FXA6	EMBL:ABCS01000001	EnsemblBacteria:EDM81930	PATRIC:29489242
69373_645103418	B7X4G7	EMBL:AAUJ02000001	EnsemblBacteria:EED66773	PATRIC:29054977	Gene3D:1.25.40.10	InterPro:IPR011990
69373_645557057	C5T4M6	EMBL:ACQT01000050	EnsemblBacteria:EER60561	PATRIC:38319678
68929_639002078	A4BQA7	EMBL:AAOF01000004	EnsemblBacteria:EAR22262	PATRIC:25482890
68929_642757511	S5CJQ3	EMBL:CP004855	RefSeq:YP_008185800.1	GeneID:16095617
68009_638977601	A3ZR92	EMBL:AANZ01000006	EnsemblBacteria:EAQ81188	PATRIC:36949343
68009_641107672	A6C171	EMBL:ABCE01000003	EnsemblBacteria:EDL61794	PATRIC:30924750
68009_645142757	D5SXZ7	EMBL:CP001744	RefSeq:YP_003631989.1	EnsemblBacteria:ADG69790	GeneID:9140699	KEGG:plm:Plim_3979	PATRIC:38245248	HOGENOM:HOG000106026	OMA:NFSAIKR	BioCyc:PLIM521674:GKE7-4047-MONOMER
68009_644020808	D0LWF2	EMBL:CP001804	RefSeq:YP_003269495.1	STRING:502025.Hoch_5114	EnsemblBacteria:ACY17602	GeneID:8547525	KEGG:hoh:Hoch_5114	eggNOG:NOG41300	HOGENOM:HOG000103722	OrthoDB:EOG6WQD51	BioCyc:HOCH502025:GI43-5155-MONOMER
68009_643162884	C7G8Y5	EMBL:ABYJ02000062	EnsemblBacteria:EEV01709	PATRIC:30039596
68009_644271145	C0FV70	EMBL:ACFY01000098	EnsemblBacteria:EEG93489	PATRIC:30050433
68009_643101054	B7ASK0	EMBL:ABVQ01000036	EnsemblBacteria:EEC57546	PATRIC:27050988
67813_640625084	A3IKQ8	EMBL:AAXW01000004	EnsemblBacteria:EAZ92777	PATRIC:27723602
67813_640625084	A3IKQ8	EMBL:AAXW01000004	EnsemblBacteria:EAZ92777	PATRIC:27723602
67793_644383315	D3SR27	EMBL:CP001932	EMBL:AOHS01000023	RefSeq:YP_003481145.1	EnsemblBacteria:ADD06583	EnsemblBacteria:ELY31956	GeneID:8825891	KEGG:nmg:Nmag_3031	HOGENOM:HOG000094979	OMA:DGAWYSS	BioCyc:NMAG547559:GJAP-3078-MONOMER
67793_644587162	C2Y4D0	EMBL:ACMP01000241	EnsemblBacteria:EEL67239	PATRIC:24833597
67793_644547919	C2UYS1	EMBL:ACMI01000149	EnsemblBacteria:EEL33463	PATRIC:25042750
67793_644485897	J8IFJ4	EMBL:AHEU01000006	EnsemblBacteria:EJR36256
67793_644553766	S3HZ40	EMBL:AHCX01000033
67793_644536274	S3HZ40	EMBL:AHCX01000033
67793_644573782	S3HZ40	EMBL:AHCX01000033
67793_640998847	A5Z703	EMBL:AAVL02000034	EnsemblBacteria:EDM51159	PATRIC:31246189
67757_638167445	Q8PT52	EMBL:AE008384	RefSeq:NP_634890.1	EnsemblBacteria:AAM32562	GeneID:1481208	KEGG:mma:MM_2866	eggNOG:NOG10114	HOGENOM:HOG000133329	OMA:VFRITPN	ProtClustDB:CLSK900426	BioCyc:MMAZ192952:GCK2-2927-MONOMER
67757_638177041	Q8TNP2	EMBL:AE010299	RefSeq:NP_617156.1	EnsemblBacteria:AAM05636	GeneID:1474129	KEGG:mac:MA2241	eggNOG:NOG10114	OMA:VFRITPN	ProtClustDB:CLSK900426	BioCyc:MACE188937:GI2O-2259-MONOMER
67757_639206613	Q0YPM6	EMBL:AASE01000025	EnsemblBacteria:EAT58264	PATRIC:27059824
67757_638167444	Q8PT53	EMBL:AE008384	RefSeq:NP_634889.1	EnsemblBacteria:AAM32561	GeneID:1481207	KEGG:mma:MM_2865	eggNOG:NOG10114	HOGENOM:HOG000133329	ProtClustDB:CLSK900426	BioCyc:MMAZ192952:GCK2-2926-MONOMER
67395_639010386	A4CDN0	EMBL:AAOH01000007	EnsemblBacteria:EAR27072
66598_641054873	A7B7F7	EMBL:AAYG02000032	EnsemblBacteria:EDN75900	PATRIC:29788592
66598_644294330	F6KLN7	EMBL:HQ426665
66598_644143467	B9AGN7	EMBL:ABYW01000013	EnsemblBacteria:EEE42627
66598_644140379	D2ZMZ6	EMBL:ABYV02000005	EnsemblBacteria:EFC93814
66598_644143151	B9AFS7	EMBL:ABYW01000010	EnsemblBacteria:EEE42317
66598_644140688	D2ZNU6	EMBL:ABYV02000006	EnsemblBacteria:EFC92943
66598_643164484	R6APY7	EMBL:CBCC010000026
66282_643318412	Q2U3B9	EMBL:AP007169	RefSeq:XP_001825079.1	ProteinModelPortal:Q2U3B9	EnsemblFungi:CADAORAT00008926	GeneID:5997174	KEGG:aor:AOR_1_170074	HOGENOM:HOG000089570	OMA:VFLRMDG	OrthoDB:EOG73JM6T	GO:GO:0046556	GO:GO:0046373	InterPro:IPR007934	SUPFAM:SSF110221
66282_642796890	B4UX90	EMBL:DS570384	EnsemblBacteria:EDX20455	PATRIC:25450786
64535_641785016	T0ERA3	EMBL:DS999527	GO:GO:0016765	Gene3D:3.40.1180.10	InterPro:IPR001441
64286_642674932	A9ANH1	EMBL:CP000869	EMBL:AP009386	RefSeq:YP_001583605.1	RefSeq:YP_001949270.1	STRING:395019.Bmul_3629	EnsemblBacteria:ABX17313	EnsemblBacteria:BAG46734	GeneID:5769087	GeneID:6361594	KEGG:bmj:BMULJ_04888	KEGG:bmu:Bmul_3629	PATRIC:19171903	HOGENOM:HOG000217326	OMA:VYQIAQF	OrthoDB:EOG6MM1HP	ProtClustDB:CLSK941629	BioCyc:BMUL395019:GIYO-4885-MONOMER
64286_638757966	Q1BQ56	EMBL:CP000379	RefSeq:YP_623222.1	STRING:331271.Bcen_3354	EnsemblBacteria:ABF78249	GeneID:4094044	KEGG:bcn:Bcen_3354	PATRIC:19050541	HOGENOM:HOG000217326	OMA:VYQIAQF	OrthoDB:EOG6MM1HP	ProtClustDB:CLSK941629	BioCyc:BCEN331271:GHKX-3428-MONOMER
64286_639943306	A0NXC6	EMBL:AAUW01000014	EnsemblBacteria:EAV42453	PATRIC:30167797
76396_639162774	Q1N5P7	EMBL:AAQH01000001	EnsemblBacteria:EAT13895
76396_641745758	A5TY29	EMBL:CM000440	EnsemblBacteria:EDK89804	PATRIC:30267763
76131_645593536	K4FE51	EMBL:CP003415	RefSeq:YP_006281509.1	GeneID:14758145	KEGG:pec:W5S_0511
75643_638742755	U5ATE2	EMBL:AWWZ01000012
75643_639190534	U5ATE2	EMBL:AWWZ01000012
75643_638748597	U5ATE2	EMBL:AWWZ01000012
75643_643303060	B7XQQ9	EMBL:ABGB01001417	RefSeq:XP_002652337.1	GeneID:8644067	EuPathDB:MicrosporidiaDB:EBI_25489
72487_644720455	C3IV30	EMBL:ACNL01000230	EnsemblBacteria:EEM99388	PATRIC:26128205
72487_638637012	C3IV30	EMBL:ACNL01000230	EnsemblBacteria:EEM99388	PATRIC:26128205
72435_641971643	I6A915	EMBL:JH692066	EnsemblBacteria:EIP85676
72435_639004274	A4BWH4	EMBL:AAOG01000001	EnsemblBacteria:EAR13315	PATRIC:29507144
72003_643311067	Q2UNW2	EMBL:AP007154	EnsemblFungi:CADAORAT00000189	HOGENOM:HOG000177708	OMA:YPENVIL	OrthoDB:EOG7712H2
72003_642873115	D3ECH1	EMBL:CP001793	RefSeq:YP_003244902.1	EnsemblBacteria:ACX67095	GeneID:8519065	KEGG:gym:GYMC10_4878	PATRIC:32158273	HOGENOM:HOG000065498	OMA:YPENVIL	OrthoDB:EOG65TS1X	BioCyc:PSP481743:GH8K-4928-MONOMER
72003_642875169	D3EFF7	EMBL:CP001793	RefSeq:YP_003243181.1	EnsemblBacteria:ACX65374	GeneID:8517299	KEGG:gym:GYMC10_3115	PATRIC:32154813	HOGENOM:HOG000065498	OMA:DIVPEAN	BioCyc:PSP481743:GH8K-3162-MONOMER
72003_645406761	S1SSV7	EMBL:CM001889
71294_645156478	D1C8H1	EMBL:CP001824	RefSeq:YP_003320936.1	EnsemblBacteria:ACZ40114	GeneID:8646632	KEGG:sti:Sthe_2700	PATRIC:32428220	HOGENOM:HOG000245015	OMA:HHLLALW	OrthoDB:EOG6GXTWC	BioCyc:STHE479434:GHJN-2755-MONOMER
71294_643002780	B5I4E1	EMBL:CM000951	EnsemblBacteria:EDY59946
71294_638881601	A3TNI8	EMBL:AAMN01000003	EnsemblBacteria:EAP98096	PATRIC:27563595
70164_644108586	Q6D0Z1	EMBL:BX950851	RefSeq:YP_051745.1	STRING:218491.ECA3657	EnsemblBacteria:CAG76555	GeneID:2882344	KEGG:eca:ECA3657	PATRIC:20482715	HOGENOM:HOG000292950	OMA:FAYFMAS	OrthoDB:EOG6X6RH1	ProtClustDB:CLSK928069	BioCyc:PATR218491:GJNB-3732-MONOMER
70164_645597067	K4FMQ8	EMBL:CP003415	RefSeq:YP_006284700.1	GeneID:14761399	KEGG:pec:W5S_3765
70164_642343667	I0DP54	EMBL:CP003488	RefSeq:YP_006214813.1	EnsemblBacteria:AFH92122	GeneID:12781531	KEGG:psi:S70_01120	BioCyc:PSTU1157951:GLIN-217-MONOMER
70164_645171120	D3PX38	EMBL:CP001778	RefSeq:YP_003514355.1	EnsemblBacteria:ADD45262	GeneID:8886847	KEGG:sna:Snas_5632	PATRIC:35373579	HOGENOM:HOG000292950	OMA:FAYFMAS	BioCyc:SNAS446470:GHHC-5674-MONOMER
69470_638356702	Q3R8G1	EMBL:AAAM03000010	EnsemblBacteria:EAO33589	PATRIC:26345104
69470_638354933	U2BUF0	EMBL:AVGA01000005
69470_638358377	U2BUF0	EMBL:AVGA01000005
85112_643971151	D5UF08	EMBL:CP001964	RefSeq:YP_003637017.1	EnsemblBacteria:ADG74818	GeneID:9145817	KEGG:cfl:Cfla_1923	PATRIC:38151847	HOGENOM:HOG000077020	OMA:DHAELPD	BioCyc:CFLA446466:GHDJ-1955-MONOMER
85112_644723441	C3JDS9	EMBL:ACNO01000001	EnsemblBacteria:EEN89680	PATRIC:29991016	InterPro:IPR016196	SUPFAM:SSF103473
85112_644042168	D2PRI8	EMBL:CP001736	RefSeq:YP_003383705.1	EnsemblBacteria:ADB34906	GeneID:8722532	KEGG:kfl:Kfla_5902	HOGENOM:HOG000077020	OMA:DHAELPD	BioCyc:KFLA479435:GI0F-5955-MONOMER
85083_640999221	A5Z820	EMBL:AAVL02000035	EnsemblBacteria:EDM51077	PATRIC:31248275
85083_645606570	D9TMG8	EMBL:CP002171	RefSeq:YP_003851540.1	EnsemblBacteria:ADL68456	GeneID:9706468	KEGG:ttm:Tthe_0920	PATRIC:42451152	HOGENOM:HOG000085549	BioCyc:TTHE580327:GHGH-955-MONOMER
85083_642195325	B0NHX1	EMBL:ABFY02000049	EnsemblBacteria:EDS05719	PATRIC:27231153
85083_645357364	C5NYC1	EMBL:ACDZ02000014	EnsemblBacteria:EER67993	PATRIC:28765994
83181_638171659	Q8ZUT9	EMBL:AE009441	RefSeq:NP_560135.1	STRING:178306.PAE2610	EnsemblBacteria:AAL64317	GeneID:1464658	KEGG:pai:PAE2610	eggNOG:NOG44488	HOGENOM:HOG000222883	OMA:EFPRARI	ProtClustDB:CLSK862715	BioCyc:PAER178306:GCEO-1885-MONOMER
83181_644404620	D6SNE1	EMBL:ACJN02000002	EnsemblBacteria:EFI34267
81985_644196576	D2ZV05	EMBL:ACDX02000004	EnsemblBacteria:EFC89161
81973_639863086	Q08U54	EMBL:CP002271	EMBL:AAMD01000134	RefSeq:YP_003951258.1	EnsemblBacteria:ADO69431	EnsemblBacteria:EAU64009	GeneID:9875120	KEGG:sur:STAUR_1627	PATRIC:38560065	BioCyc:SAUR378806:GCZI-1627-MONOMER
81973_644029083	E4NVE6	EMBL:CP001692	RefSeq:YP_004037966.1	EnsemblBacteria:ADQ68830	GeneID:9988617	KEGG:hbo:Hbor_33040	HOGENOM:HOG000296793	OMA:SIRIRFD	BioCyc:HBOR469382:GCNS-3303-MONOMER
80772_642888863	D1NQH6	EMBL:ABVG02000005	EnsemblBacteria:EFB37335
80772_645599341	C9RFU9	EMBL:CP001787	RefSeq:YP_003246933.1	STRING:579137.Metvu_0592	EnsemblBacteria:ACX72451	GeneID:8512926	KEGG:mvu:Metvu_0592	eggNOG:NOG310688	BioCyc:MVUL579137:GHFP-600-MONOMER
80533_641442483	A8UV40	EMBL:ABHJ01000005	EnsemblBacteria:EDP75460	PATRIC:38513520
80533_640024244	A0ZBX7	EMBL:AAVW01000007	REBASE:23876	EnsemblBacteria:EAW46562	PATRIC:25515283
78460_645525997	M8DU35	EMBL:AMYG01000017	EnsemblBacteria:EMT39986
78460_645570991	M8DU35	EMBL:AMYG01000017	EnsemblBacteria:EMT39986
78460_645645369	M8DU35	EMBL:AMYG01000017	EnsemblBacteria:EMT39986
78460_645659647	M8DU35	EMBL:AMYG01000017	EnsemblBacteria:EMT39986
77574_639860030	Q094B0	EMBL:CP002271	EMBL:AAMD01000041	RefSeq:YP_003952469.1	EnsemblBacteria:ADO70642	EnsemblBacteria:EAU67073	GeneID:9876343	KEGG:sur:STAUR_2850	PATRIC:38553963	BioCyc:SAUR378806:GCZI-2850-MONOMER
77574_640222520	A1ZRJ8	EMBL:AAWS01000028	EnsemblBacteria:EAY26903	PATRIC:26279627
77574_641137383	A6E6G4	EMBL:ABCM01000001	EnsemblBacteria:EDM38500	PATRIC:31334395
77574_640370372	Q7S2N4	EMBL:AABX02000071	RefSeq:XP_958933.1	EnsemblFungi:EFNCRT00000009111	GeneID:3875080	KEGG:ncr:NCU09354	eggNOG:NOG121753	OMA:MMDITYS	OrthoDB:EOG73JM5B
77299_645385001	D9VT81	EMBL:GG657750	EnsemblBacteria:EFL14815
76541_644009977	D2SCZ6	EMBL:CP001867	RefSeq:YP_003410716.1	EnsemblBacteria:ADB76345	GeneID:8755453	KEGG:gob:Gobs_3768	PATRIC:32176669	HOGENOM:HOG000288146	OMA:NVNDHRS	BioCyc:GOBS526225:GI00-3811-MONOMER
76541_640012766	A0YEG1	EMBL:AAVT01000006	EnsemblBacteria:EAW30797	PATRIC:25936482
76541_640022115	A0Z5X5	EMBL:AAVV01000007	EnsemblBacteria:EAW40735	PATRIC:25928346
76541_640022958	A0Z8A8	EMBL:AAVV01000013	EnsemblBacteria:EAW39836	PATRIC:25930172
96296_644025754	E4NMB6	EMBL:CP001690	EMBL:AOHT01000024	RefSeq:YP_004036766.1	EnsemblBacteria:ADQ67321	EnsemblBacteria:ELY28536	GeneID:9993572	KEGG:hbo:Hbor_17530	HOGENOM:HOG000059086	OMA:ECREMEL	BioCyc:HBOR469382:GCNS-1752-MONOMER
96296_639016211	Q1ZT00	EMBL:AAOJ01000002	EnsemblBacteria:EAS64827	PATRIC:31348961
96296_645167744	D3Q6U4	EMBL:CP001778	RefSeq:YP_003509436.1	EnsemblBacteria:ADD40343	GeneID:8881813	KEGG:sna:Snas_0629	PATRIC:35363580	HOGENOM:HOG000059086	OMA:ECREMEL	BioCyc:SNAS446470:GHHC-640-MONOMER
96296_644521242	C2STR2	EMBL:ACMD01000189	EnsemblBacteria:EEL03160	PATRIC:24902793
95156_645162487	D2QV71	EMBL:CP001770	RefSeq:YP_003391502.1	EnsemblBacteria:ADB42703	GeneID:8716013	KEGG:sli:Slin_6747	PATRIC:32443396	HOGENOM:HOG000109590	OMA:HHHDGDE	BioCyc:SLIN504472:GHKB-6806-MONOMER
94659_638175871	Q8TRR3	EMBL:AE010299	RefSeq:NP_616051.1	STRING:188937.MA1107	EnsemblBacteria:AAM04531	GeneID:1472996	KEGG:mac:MA1107	eggNOG:NOG304130	OMA:INTIAYQ	ProtClustDB:CLSK811758	BioCyc:MACE188937:GI2O-1118-MONOMER
94659_643162689	C0C4Z8	EMBL:ABYI02000036	EnsemblBacteria:EEG72766	PATRIC:30579905
94659_642322558	B1C136	EMBL:ABIK02000007	EnsemblBacteria:EDS75091	PATRIC:27258876
94659_642190880	B0N5E7	EMBL:ABFX02000006	EnsemblBacteria:EDS18315	PATRIC:27222625
94659_643115597	B6FSI1	EMBL:ABWO01000179	EnsemblBacteria:EEA81001	PATRIC:30598492
94659_641047789	A6NT12	EMBL:AAXG02000010	EnsemblBacteria:EDN00575	PATRIC:31028455
93454_645161892	D2QTT9	EMBL:CP001769	RefSeq:YP_003391020.1	EnsemblBacteria:ADB42221	GeneID:8730046	KEGG:sli:Slin_6262	PATRIC:32442445	HOGENOM:HOG000050558	BioCyc:SLIN504472:GHKB-6319-MONOMER
92768_645167309	D3QAE9	EMBL:CP001778	RefSeq:YP_003511825.1	EnsemblBacteria:ADD42732	GeneID:8884260	KEGG:sna:Snas_3061	PATRIC:35368431	HOGENOM:HOG000101674	OMA:AKEIVIC	BioCyc:SNAS446470:GHHC-3087-MONOMER
92768_645165844	D3Q593	EMBL:CP001778	RefSeq:YP_003513235.1	EnsemblBacteria:ADD44142	GeneID:8885702	KEGG:sna:Snas_4497	PATRIC:35371295	HOGENOM:HOG000101674	OMA:IHENSSV	BioCyc:SNAS446470:GHHC-4529-MONOMER	Gene3D:2.120.10.30	InterPro:IPR011042
92613_645510765	C7GZC4	EMBL:ACON01000001	EnsemblBacteria:EEU04019	PATRIC:30671792
92613_644141853	D2ZS33	EMBL:ABYV02000011	EnsemblBacteria:EFC92633
92613_638467012	U3Q773	EMBL:CP006645
92613_644408406	D0L1B4	EMBL:CP001801	RefSeq:YP_003263534.1	STRING:555778.Hneap_1661	EnsemblBacteria:ACX96487	GeneID:8534819	KEGG:hna:Hneap_1661	PATRIC:32207244	eggNOG:NOG265677	OMA:TIPYRNG	OrthoDB:EOG6GXTV3	BioCyc:HNEA555778:GIVV-1707-MONOMER
91710_641400540	A8RHF3	EMBL:ABCC02000009	EnsemblBacteria:EDP18964	PATRIC:36963470
91710_644177081	C0CXH5	EMBL:ACCJ01000084	EnsemblBacteria:EEG56215
91710_645520900	D9SLN8	EMBL:CP002160	RefSeq:YP_003845439.1	EnsemblBacteria:ADL53675	GeneID:9610925	KEGG:ccb:Clocel_4012	PATRIC:41734131	OMA:HTACYRG	BioCyc:CCEL573061:GIXD-4118-MONOMER
91045_642468500	S0A7I1	EMBL:CP004053	RefSeq:YP_008144254.1	GeneID:16027646
91045_643303001	B7XQK8	EMBL:ABGB01001367	RefSeq:XP_002652286.1	GeneID:8644006	EuPathDB:MicrosporidiaDB:EBI_24111
91045_641040861	A7A6A1	EMBL:AAXD02000028	EnsemblBacteria:EDN83089	PATRIC:27188987	OrthoDB:EOG6V7BK4
91045_642853511	B5CRE4	EMBL:ABOU02000047	EnsemblBacteria:EDY32166	PATRIC:29793559
90748_637780608	Q39QE3	EMBL:CP000148	RefSeq:YP_006722272.1	STRING:269799.Gmet_3318	EnsemblBacteria:ABB33531	GeneID:3740711	KEGG:gme:Gmet_3318	PATRIC:22005910	eggNOG:NOG79689	HOGENOM:HOG000244843	OMA:HAGENAC	OrthoDB:EOG6WT8FV	ProtClustDB:CLSK828825	BioCyc:GMET269799:GHNY-3366-MONOMER	InterPro:IPR024096	SUPFAM:SSF111126
89613_643315551	Q2UBD0	EMBL:AP007162	RefSeq:XP_001822268.1	EnsemblFungi:CADAORAT00009395	GeneID:5994313	KEGG:aor:AOR_1_30134	HOGENOM:HOG000217408	OMA:YLHEIGH	OrthoDB:EOG7C8GTC	GO:GO:0008237	Gene3D:3.40.390.10	InterPro:IPR024079
89613_645399668	D9WFL8	EMBL:GG657754	EnsemblBacteria:EFL28976	GO:GO:0008237	Gene3D:3.40.390.10	InterPro:IPR024079
89613_640292825	I1RET1	EnsemblFungi:FGSG_02182T0	OrthoDB:EOG7C5MK4
86651_645152810	D1ALU9	EMBL:CP001739	RefSeq:YP_003307148.1	EnsemblBacteria:ACZ07217	GeneID:8595828	KEGG:str:Sterm_0333	PATRIC:32404578	HOGENOM:HOG000109055	OMA:LVAFWRD	OrthoDB:EOG67MDZK	BioCyc:STER526218:GHLD-339-MONOMER	Gene3D:2.130.10.10	InterPro:IPR015943
86651_645149898	D1AKG4	EMBL:CP001739	RefSeq:YP_003309011.1	EnsemblBacteria:ACZ09080	GeneID:8597691	KEGG:str:Sterm_2226	PATRIC:32408430	HOGENOM:HOG000109055	OMA:NIVNEAP	OrthoDB:EOG61ZTHJ	BioCyc:STER526218:GHLD-2236-MONOMER
86651_637980437	Q1LD98	EMBL:CP000353	RefSeq:YP_587147.1	STRING:266264.Rmet_5016	EnsemblBacteria:ABF11878	GeneID:4041878	KEGG:rme:Rmet_5016	PATRIC:20294792	eggNOG:NOG118469	OMA:NIVNEAP	OrthoDB:EOG61ZTHJ	ProtClustDB:CLSK2777565	BioCyc:CMET266264:GJ5G-5504-MONOMER	InterPro:IPR011044	SUPFAM:SSF50969
86651_640022173	A0Z633	EMBL:AAVV01000007	EnsemblBacteria:EAW40793	PATRIC:25928476	InterPro:IPR011047	SUPFAM:SSF50998
99886_644204471	E0DGW2	EMBL:ACSH02000005	EnsemblBacteria:EFM48939
99886_645582540	E0DGW2	EMBL:ACSH02000005	EnsemblBacteria:EFM48939
99886_638177268	Q8TN32	EMBL:AE010299	RefSeq:NP_617367.1	STRING:188937.MA2461	EnsemblBacteria:AAM05847	GeneID:1474350	KEGG:mac:MA2461	eggNOG:NOG133238	OMA:LEYISTN	ProtClustDB:CLSK568915	BioCyc:MACE188937:GI2O-2486-MONOMER
99756_638941172	A3Y067	EMBL:AAND01000018	EnsemblBacteria:EAQ53135	PATRIC:28412572
99756_639055893	Q2BRH5	EMBL:AAOW01000001	EnsemblBacteria:EAR62851	PATRIC:25473657
110532_638885955	A3U0U6	EMBL:AAMO01000008	EnsemblBacteria:EAQ02387
110532_641429433	A8TJP9	EMBL:ABHC01000001	EnsemblBacteria:EDP66844	PATRIC:30872823
108476_645267217	F2ZRP0	EMBL:ABZR01000769	EnsemblBacteria:EGI05093
108476_643090408	E2MJ31	EMBL:ABSM01000028	EnsemblBacteria:EEB58049	PATRIC:25628899
108476_643301367	B7XL58	EMBL:ABGB01000172	RefSeq:XP_002650736.1	GeneID:8642372	EuPathDB:MicrosporidiaDB:EBI_24391
107714_639100709	Q1YWU7	EMBL:AAPH01000048	EnsemblBacteria:EAS40755	PATRIC:30914521
107045_643997713	D2Z7Y3	EMBL:ABTR02000001	EnsemblBacteria:EFC91580
106635_638915532	A3WEJ0	EMBL:AAMW01000002	EnsemblBacteria:EAQ27958
106635_640009772	A0Y608	EMBL:AAVS01000034	EnsemblBacteria:EAW26260	PATRIC:24467962
104169_642870270	D3E9K7	EMBL:CP001793	RefSeq:YP_003240465.1	EnsemblBacteria:ACX62658	GeneID:8514512	KEGG:gym:GYMC10_0352	PATRIC:32149231	HOGENOM:HOG000245830	OMA:MAGMIEI	OrthoDB:EOG679TFK	BioCyc:PSP481743:GH8K-375-MONOMER
104169_638177260	Q8TN40	EMBL:AE010299	RefSeq:NP_617359.1	STRING:188937.MA2453	EnsemblBacteria:AAM05839	GeneID:1474342	KEGG:mac:MA2453	OMA:MAGMIEI	ProtClustDB:CLSK634540	BioCyc:MACE188937:GI2O-2478-MONOMER
104169_642889063	D1NKB4	EMBL:ABVG02000001	EnsemblBacteria:EFB38280
104169_645641947	H8EK65	EMBL:AJGT01000012	EnsemblBacteria:EIC05651
104062_644404298	D6SUF6	EMBL:ACJN02000004	EnsemblBacteria:EFI32936
103235_641463343	A9D4M0	EMBL:ABIC01000009	EnsemblBacteria:EDQ01579	PATRIC:28557571	InterPro:IPR010235	Pfam:PF08780
103137_638168806	Q8TX92	EMBL:AE009439	RefSeq:NP_614067.1	STRING:190192.MK0783	EnsemblBacteria:AAM01997	GeneID:1476884	KEGG:mka:MK0783	eggNOG:NOG121286	HOGENOM:HOG000262578	OMA:VIDMSTT	ProtClustDB:CLSK634694	GO:GO:0050532	GO:GO:0000287	InterPro:IPR005238	SUPFAM:SSF142823
102735_640025100	A0ZEC7	EMBL:AAVW01000022	EnsemblBacteria:EAW45690	PATRIC:25517102
102735_638177523	Q8TMF6	EMBL:AE010299	RefSeq:NP_617601.1	STRING:188937.MA2702	EnsemblBacteria:AAM06081	GeneID:1474595	KEGG:mac:MA2702	eggNOG:NOG134549	OMA:SCTEAAR	ProtClustDB:CLSK282053	BioCyc:MACE188937:GI2O-2731-MONOMER
102617_641149974	A6F6W5	EMBL:ABCQ01000001	EnsemblBacteria:EDM69296	PATRIC:25976369
102319_645176223	D2B3I0	EMBL:CP001814	RefSeq:YP_003340239.1	EnsemblBacteria:ACZ87496	GeneID:8667933	KEGG:sro:Sros_4639	PATRIC:32471205	HOGENOM:HOG000091292	OMA:FAMAIEV	OrthoDB:EOG63JRC1	BioCyc:SROS479432:GI0V-4669-MONOMER
101981_641428774	D7DST5	EMBL:CP002057	RefSeq:YP_003707168.1	EnsemblBacteria:ADI36195	GeneID:9275757	KEGG:mvo:Mvol_0535	OMA:AFENNIE	BioCyc:MVOL456320:GHV9-548-MONOMER
101196_641391989	A7VE83	EMBL:AAYW02000008	EnsemblBacteria:EDO58086	PATRIC:27240814	Gene3D:3.40.50.10400	InterPro:IPR027269
101196_645531217	E8WUS6	EMBL:CP002479	RefSeq:YP_004199670.1	EnsemblBacteria:ADW14394	GeneID:10198560	KEGG:geb:GM18_2950	PATRIC:46949784	HOGENOM:HOG000018449	OMA:LAYMECC	BioCyc:GSP443143:GHZL-3000-MONOMER	Gene3D:3.40.50.10400	InterPro:IPR027269
101196_638158951	O30317	EMBL:AE000782	PIR:A69544	RefSeq:NP_071175.1	DNASU:1485583	EnsemblBacteria:AAB91318	GeneID:1485583	KEGG:afu:AF2353	eggNOG:NOG77285	BioCyc:AFUL224325:GJBC-2401-MONOMER
100329_643171514	K1VT86	EMBL:AFXD01000041	EnsemblBacteria:EKD07570
100329_640629064	A3IX07	EMBL:AAXW01000058	EnsemblBacteria:EAZ89006	PATRIC:27731544
129441_644028289	E4NRU6	EMBL:CP001690	EMBL:AOHT01000010	RefSeq:YP_004036328.1	EnsemblBacteria:ADQ66883	EnsemblBacteria:ELY30390	GeneID:9993119	KEGG:hbo:Hbor_13000	HOGENOM:HOG000056290	OMA:HAPNTDR	BioCyc:HBOR469382:GCNS-1299-MONOMER
129441_645657211	F1T7V6	EMBL:ACXX02000001	EnsemblBacteria:EGD49554
129304_644141857	D2ZS37	EMBL:ABYV02000011	EnsemblBacteria:EFC92637
129304_644141980	B9ACI3	EMBL:ABYW01000001	EnsemblBacteria:EEE41173
129304_639881976	Q0EWR6	EMBL:AATS01000018	EnsemblBacteria:EAU53723	PATRIC:28827997
129304_645282105	K6BA75	EMBL:ACUA01000001	EnsemblBacteria:EKN33026
128936_638174155	Q8U0P0	EMBL:AE009950	RefSeq:NP_579275.1	ProteinModelPortal:Q8U0P0	STRING:186497.PF1546	EnsemblBacteria:AAL81670	GeneID:1469422	KEGG:pfu:PF1546	eggNOG:NOG05801	HOGENOM:HOG000073708	OMA:AYRKIKQ	ProtClustDB:CLSK306102
128936_641127805	A6DEF9	EMBL:ABCJ01000011	EnsemblBacteria:EDM23052	PATRIC:30460292
128936_641443322	A8UY39	EMBL:ABHJ01000013	EnsemblBacteria:EDP74584	PATRIC:38515122
127740_638719349	B5SEN2	EMBL:CU914168	RefSeq:YP_002258221.1	GeneID:6958313
127740_638177223	Q8TN77	EMBL:AE010299	RefSeq:NP_617322.1	STRING:188937.MA2416	EnsemblBacteria:AAM05802	GeneID:1474305	KEGG:mac:MA2416	eggNOG:NOG11193	OMA:DYPGIRH	ProtClustDB:CLSK566393	BioCyc:MACE188937:GI2O-2438-MONOMER
126998_640222961	A1ZST6	EMBL:AAWS01000033	EnsemblBacteria:EAY26500	PATRIC:26280500
126998_644383361	D3SR71	EMBL:CP001932	EMBL:AOHS01000023	RefSeq:YP_003481189.1	EnsemblBacteria:ADD06627	EnsemblBacteria:ELY31912	GeneID:8825935	KEGG:nmg:Nmag_3075	OMA:NTTSRIF	BioCyc:NMAG547559:GJAP-3122-MONOMER
125825_640221853	A1ZPP0	EMBL:AAWS01000022	EnsemblBacteria:EAY27545	PATRIC:26278367
125825_638987180	A4AIC0	EMBL:AAOB01000005	EnsemblBacteria:EAR24895	PATRIC:25921377
125528_641106906	A6BZ10	EMBL:ABCE01000001	EnsemblBacteria:EDL62305	PATRIC:30923210
125220_640616698	A3HX79	EMBL:AAXU02000001	EnsemblBacteria:EAZ81202	GO:GO:0003824	GO:GO:0005975	Gene3D:3.20.20.80	InterPro:IPR013781	InterPro:IPR017853	SUPFAM:SSF51445
125220_639047408	Q2CF10	EMBL:AAOT01000014	EnsemblBacteria:EAR51317	PATRIC:28503503	InterPro:IPR017853	SUPFAM:SSF51445
125220_639047407	Q2CF11	EMBL:AAOT01000014	EnsemblBacteria:EAR51316	PATRIC:28503501	InterPro:IPR017853	SUPFAM:SSF51445
123707_644570028	C2WR51	EMBL:ACMM01000172	EnsemblBacteria:EEL54890	PATRIC:25100616
123707_645482957	C4V5D0	EMBL:ACLA01000023	EnsemblBacteria:EEQ48009	PATRIC:25818134
123588_645525207	D9SQR5	EMBL:CP002160	RefSeq:YP_003844035.1	EnsemblBacteria:ADL52271	GeneID:9609434	KEGG:ccb:Clocel_2559	PATRIC:41737149	HOGENOM:HOG000086939	OMA:LATISHD	BioCyc:CCEL573061:GIXD-2626-MONOMER
123588_638167950	Q8PRU6	EMBL:AE008384	RefSeq:NP_635371.1	EnsemblBacteria:AAM33043	GeneID:1481689	KEGG:mma:MM_3347	eggNOG:NOG247879	HOGENOM:HOG000086939	OMA:LATISHD	ProtClustDB:CLSK903353	BioCyc:MMAZ192952:GCK2-3411-MONOMER
123588_645523441	D9SQE0	EMBL:CP002160	RefSeq:YP_003841971.1	EnsemblBacteria:ADL50207	GeneID:9607275	KEGG:ccb:Clocel_0430	PATRIC:41736119	HOGENOM:HOG000086939	OMA:LYSWVQP	BioCyc:CCEL573061:GIXD-467-MONOMER
121680_645642961	U4MPW6	EMBL:CBQO010000045
120911_644141567	D2ZR96	EMBL:ABYV02000006	EnsemblBacteria:EFC93793
120911_644142279	B9ADD0	EMBL:ABYW01000004	EnsemblBacteria:EEE41470
120911_644193381	D7V096	EMBL:ACCR02000005	EnsemblBacteria:EFI82989
120911_641751747	J7MJ13	EMBL:FR720325	RefSeq:YP_006693181.1	EnsemblBacteria:CBY03749	GeneID:13605197	KEGG:lmz:LMOSLCC2482_1228
120881_638170681	Q8ZXG7	EMBL:AE009441	RefSeq:NP_559199.1	ProteinModelPortal:Q8ZXG7	STRING:178306.PAE1293	EnsemblBacteria:AAL63381	GeneID:1465619	KEGG:pai:PAE1293	eggNOG:NOG275617	HOGENOM:HOG000249357	OMA:WRGWWRV	ProtClustDB:CLSK811301	BioCyc:PAER178306:GCEO-912-MONOMER
120881_638188194	Q9YEU6	EMBL:BA000002	PIR:F72744	RefSeq:NP_147270.2	ProteinModelPortal:Q9YEU6	STRING:272557.APE_0485.1	EnsemblBacteria:BAA79450	GeneID:1444667	KEGG:ape:APE_0485.1	eggNOG:NOG275617	OMA:WRGWWRV	BioCyc:APER272557:GJD6-372-MONOMER
120043_645600311	C6NTC8	EMBL:ACVD01000057	ProteinModelPortal:C6NTC8	EnsemblBacteria:EET27835	PATRIC:24325363	Gene3D:2.40.160.10	InterPro:IPR023614
120043_643301147	B7XKJ4	EMBL:ABGB01000072	RefSeq:XP_002650522.1	ProteinModelPortal:B7XKJ4	GeneID:8642151	EuPathDB:MicrosporidiaDB:EBI_23016	Gene3D:2.40.160.10	InterPro:IPR023614
118870_641417226	D2BIC3	EMBL:CP001827	RefSeq:YP_003330401.1	EnsemblBacteria:ACZ62073	GeneID:8657886	KEGG:dev:DhcVS_954	PATRIC:32058818	HOGENOM:HOG000275292	OMA:KGFFARW	OrthoDB:EOG6V1M52	BioCyc:DSP311424:GJ8J-928-MONOMER
118645_644384090	D3T1Q8	EMBL:CP001934	EMBL:AOHS01000051	RefSeq:YP_003482079.1	EnsemblBacteria:ADD07517	EnsemblBacteria:ELY26551	GeneID:8828715	KEGG:nmg:Nmag_3981	BioCyc:NMAG547559:GJAP-4042-MONOMER
118645_645419319	D9XNX4	EMBL:GG657758	EnsemblBacteria:EFL40408
118645_645382974	D9VL46	EMBL:GG657750	EnsemblBacteria:EFL12852
118448_645412030	D9X2D1	EMBL:GG657757	EnsemblBacteria:EFL33600
118448_638175262	Q8TTC2	EMBL:AE010299	RefSeq:NP_615479.1	EnsemblBacteria:AAM03959	GeneID:1472407	KEGG:mac:MA0515	eggNOG:NOG136869	OMA:EVAPNIL	ProtClustDB:CLSK634373	BioCyc:MACE188937:GI2O-519-MONOMER
118448_638977686	A3ZRI1	EMBL:AANZ01000007	EnsemblBacteria:EAQ80750	PATRIC:36945607
118448_638959443	A3YYB1	EMBL:AANO01000005	EnsemblBacteria:EAQ75093	PATRIC:29894443
116603_642162924	B0ABF0	EMBL:ABEZ02000019	EnsemblBacteria:EDQ95933	PATRIC:25249974
115843_645609651	M8DFJ2	EMBL:AMYG01000038	EnsemblBacteria:EMT38787
113945_641430771	A8TP04	EMBL:ABHC01000005	EnsemblBacteria:EDP65093	PATRIC:30875509
113945_639003251	A4BTL5	EMBL:AAOF01000014	EnsemblBacteria:EAR20971	PATRIC:25480826
113945_645546244	D3RQ97	EMBL:CP001896	RefSeq:YP_003442734.1	EnsemblBacteria:ADC61702	GeneID:8786093	KEGG:alv:Alvin_0755	PATRIC:31921263	BioCyc:AVIN572477:GCJK-766-MONOMER
112932_642190634	B0N4R4	EMBL:ABFX02000005	EnsemblBacteria:EDS18666	PATRIC:27222146	InterPro:IPR016024	SUPFAM:SSF48371
112932_643957433	D5UAY9	EMBL:CP001959	RefSeq:YP_003634061.1	EnsemblBacteria:ADG71862	GeneID:9142776	KEGG:brm:Bmur_1780	PATRIC:38145738	HOGENOM:HOG000295108	BioCyc:BMUR526224:GHIV-1809-MONOMER	Gene3D:1.25.10.10	InterPro:IPR011989	InterPro:IPR016024	SUPFAM:SSF48371
111894_639300192	A9CH98	EMBL:AE007870	PIR:AF3156	PIR:C98131	RefSeq:NP_355788.1	ProteinModelPortal:A9CH98	STRING:176299.Atu4874	EnsemblBacteria:AAK88573	GeneID:1136748	KEGG:atu:Atu4874	eggNOG:NOG27498	HOGENOM:HOG000042990	OMA:TETEDYA	OrthoDB:EOG60659M	BioCyc:AGRO:ATU4874-MONOMER
110846_639206173	Q0YQV7	EMBL:AASE01000014	EnsemblBacteria:EAT58720	PATRIC:27058837
161001_644403724	D6SLN8	EMBL:ACJN02000001	EnsemblBacteria:EFI35599
157565_643303209	B7XR38	EMBL:ABGB01001559	RefSeq:XP_002652466.1	GeneID:8644215	EuPathDB:MicrosporidiaDB:EBI_21758
155329_638167657	Q8PSL4	EMBL:AE008384	RefSeq:NP_635089.1	STRING:192952.MM_3065	EnsemblBacteria:AAM32761	GeneID:1481407	KEGG:mma:MM_3065	eggNOG:NOG75307	HOGENOM:HOG000228824	OMA:EPPNETE	ProtClustDB:CLSK813027	BioCyc:MMAZ192952:GCK2-3130-MONOMER
153967_642127387	M9GV25	EMBL:AQEI01000016	EnsemblBacteria:EMX36319
152969_644022163	D0LVV2	EMBL:CP001804	RefSeq:YP_003265979.1	STRING:502025.Hoch_1534	EnsemblBacteria:ACY14086	GeneID:8543916	KEGG:hoh:Hoch_1534	PATRIC:32192736	eggNOG:NOG309454	BioCyc:HOCH502025:GI43-1546-MONOMER
152969_641166947	A6GJP9	EMBL:ABCS01000163	EnsemblBacteria:EDM73911	PATRIC:29505346
152969_641159677	A6FZ45	EMBL:ABCS01000005	EnsemblBacteria:EDM81200	PATRIC:29490548
151060_643003516	B5I6J5	EMBL:CM000951	EnsemblBacteria:EDY60700	InterPro:IPR018713	Pfam:PF09995
151060_644237908	B9BG97	EMBL:ACFB01000020	EnsemblBacteria:EED96963	InterPro:IPR018713	Pfam:PF09995
151060_640296900	I1S6Y7	EnsemblFungi:FGSG_12610T0	OrthoDB:EOG7N0CF0
147498_644335770	C2G0V8	EMBL:ACHB01000071	EnsemblBacteria:EEI91188	PATRIC:29432062
147498_643096797	B7AGN7	EMBL:ABVO01000024	EnsemblBacteria:EEC54166	PATRIC:27005663
147397_645603877	D5CQZ0	EMBL:CP001965	RefSeq:YP_003523763.1	EnsemblBacteria:ADE11376	GeneID:8891811	KEGG:slt:Slit_1138	PATRIC:35400360	HOGENOM:HOG000161106	BioCyc:SLIT580332:GH9F-1156-MONOMER
147397_640637596	A3JL42	EMBL:AAXY01000055	EnsemblBacteria:EAZ97093	PATRIC:31007059
147397_645434874	D7VNU8	EMBL:ACHA02000011	EnsemblBacteria:EFK57595
140428_642987348	B5GU28	EMBL:DS570645	EnsemblBacteria:EDY49824	PATRIC:29746359
139741_640614972	A3HSC0	EMBL:AAXU02000001	EnsemblBacteria:EAZ82738
139741_643312930	Q2UIM8	EMBL:AP007155	RefSeq:XP_001820589.1	EnsemblFungi:CADAORAT00002052	GeneID:5992572	KEGG:aor:AOR_1_2738154	HOGENOM:HOG000088844	OMA:ESINGDK	OrthoDB:EOG744TJB
139409_644012326	D2SF80	EMBL:CP001867	RefSeq:YP_003409141.1	EnsemblBacteria:ADB74770	GeneID:8753753	KEGG:gob:Gobs_2082	PATRIC:32173281	HOGENOM:HOG000000110	OMA:FEDEWYD	BioCyc:GOBS526225:GI00-2110-MONOMER
132061_642811873	B3CCB4	EMBL:ABJL02000008	EnsemblBacteria:EDV04623	PATRIC:27035344
132061_641403059	R0DX36	EMBL:AGYF01000001	EnsemblBacteria:ENZ74534
214048_642812190	B3CE46	EMBL:ABJL02000008	EnsemblBacteria:EDV04937	PATRIC:27035932
214048_644168532	E2NHC0	EMBL:ACCH01000269	EnsemblBacteria:EEF88689	PATRIC:26975366
213859_644152335	D1PMH1	EMBL:ACBY02000023	EnsemblBacteria:EFB75756
213714_638167656	Q8PSL5	EMBL:AE008384	RefSeq:NP_635088.1	STRING:192952.MM_3064	EnsemblBacteria:AAM32760	GeneID:1481406	KEGG:mma:MM_3064	eggNOG:NOG80930	OMA:IGCQDAF	ProtClustDB:CLSK813026	BioCyc:MMAZ192952:GCK2-3129-MONOMER
212636_641097387	A7BTE1	EMBL:ABBZ01000228	EnsemblBacteria:EDN70200
208882_644676885	C3FC35	EMBL:ACNE01000179	EnsemblBacteria:EEM56292	PATRIC:28912294
208882_642070223	B3ZX53	EMBL:ABDM02000062	EnsemblBacteria:EDX59883	PATRIC:24747571
199655_643301425	B7XLB4	EMBL:ABGB01000201	RefSeq:XP_002650792.1	GeneID:8642427	EuPathDB:MicrosporidiaDB:EBI_23015	GO:GO:0004035
199569_642556002	Q1Q1A6	EMBL:CT573071	PRIDE:Q1Q1A6
183853_644381187	D3SUB5	EMBL:CP001932	EMBL:AOHS01000063	RefSeq:YP_003479735.1	EnsemblBacteria:ADD05173	EnsemblBacteria:ELY23211	GeneID:8824431	KEGG:nmg:Nmag_1597	HOGENOM:HOG000095319	OMA:LRTEERK	BioCyc:NMAG547559:GJAP-1617-MONOMER
183853_640637308	A3JKA6	EMBL:AAXY01000038	EnsemblBacteria:EAZ97379	PATRIC:31006528
181040_644058670	D7BG88	EMBL:CP002042	RefSeq:YP_003683517.1	EnsemblBacteria:ADH62009	GeneID:9249538	KEGG:msv:Mesil_0062	PATRIC:38188780	HOGENOM:HOG000104036	OMA:CVPPLAM	BioCyc:MSIL526227:GJ9Q-63-MONOMER
181040_644028974	E4NVB5	EMBL:CP001692	EMBL:AOHT01000017	RefSeq:YP_004038240.1	EnsemblBacteria:ADQ69104	EnsemblBacteria:ELY29395	GeneID:9988897	KEGG:hbo:Hbor_35840	HOGENOM:HOG000104036	OMA:CVPPLAM	BioCyc:HBOR469382:GCNS-3583-MONOMER
176566_642557004	Q1Q440	EMBL:CT573071
175090_642559883	B0VIS7	EMBL:CU466930	RefSeq:YP_001740194.1	GeneID:14676164	PATRIC:38435286	HOGENOM:HOG000043679	BioCyc:CCLO456827:GHN5-74-MONOMER
173344_643301430	B7XLB9	EMBL:ABGB01000205	RefSeq:XP_002650797.1	GeneID:8642434	EuPathDB:MicrosporidiaDB:EBI_22778
