# Supplementary material for: A most wanted list of conserved microbial protein families with no known domains
Source: PLoS One. 2018 Oct 17;13(10):e0205749. doi: 10.1371/journal.pone.0205749 (PMC6192648; doi:10.1371/journal.pone.0205749)
Supplement: S4 Table — (XLSX) [file pone.0205749.s010.xlsx]

## Sheet: Column Definitions
Column Name	Definition
HMP_Body(Sub)site	Body (sub)site name (e.g., Gastrointestinal tract, (Supragingival plaque))
FUNKID	FUnkFam ID (e.g., X6_43108), format is Xn_SFam.ID where n is phylogenetic span
PHENONAME	Environmental variable (e.g., month, oxygen_sensor, chlorophyll_sensor, ...)
Coeff_Name	Model variable (categorical and continuous mixed, e.g, monthJuly, oxygen_sensor)
p_adj_fdr	FDR-adjusted p-value (aka Benjamini-Hochberg)
p.value	p-value for t-test of term coefficient
N_samples	Number of samples in this model
FF_Entropy_bits	FUnkFam presence/absence variation across samples in bits
FF_PercentPresent	Percent of samples FUnkFam is present in
PH_Entropy_bits	Variation for categorical variables across samples in bits
Estimate	Estimate of term coefficient
Std_Err	Std error of term coefficient
z_value	test statistic

## Sheet: HMP Body Site Associations
HMP_BodySite	FUNKID	PHENONAME	Coeff_Name	p_adj_fdr	p_value	N_samples	FF_Entropy_bits	FF_PercentPresent	PH_Entropy_bits	Estimate	Std_Err	z_value
Gastrointestinal tract	X6_143839	MURICA	MURICATRUE	0.966808	0.000846266	111	0.709098	0.189189	0.500955	-2.24169	0.671726	-3.3372
Gastrointestinal tract	X6_80255	BMI_CAT	BMI_CAToverweight	0.966808	0.000952363	111	0.889288	0.297297	1.43492	1.58161	0.478663	3.30423
Oral	X6_36135	MURICA	MURICATRUE	0.966808	0.000978162	379	0.606585	0.147757	0.512293	-1.4164	0.429639	-3.29673
Oral	X6_61889	MURICA	MURICATRUE	0.966808	0.00108144	379	0.901142	0.686016	0.512293	1.08251	0.331203	3.26843
Gastrointestinal tract	X6_152703	BMI_CAT	BMI_CAToverweight	1	0.00299005	111	0.76316	0.216216	1.43492	1.62575	0.547618	2.96876
Gastrointestinal tract	X6_189038	BMI_CAT	BMI_CAToverweight	1	0.00396624	111	1	0.459459	1.43492	1.26217	0.438128	2.88083
Gastrointestinal tract	X6_141836	MURICA	MURICATRUE	1	0.00403648	111	0.865561	0.279279	0.500955	-1.8945	0.658887	-2.8753
Oral	X6_17925	DCMCODE_13	DCMCODE_13TRUE	1	0.00432266	80	0.950055	0.35	0.621261	2.06875	0.72496	2.8536
Oral	X6_72839	OCPTN_ST	OCPTN_STTRUE	1	0.00476305	77	0.911497	0.688312	1	-1.64951	0.584385	-2.82264
Gastrointestinal tract	X6_149008	BMI_CAT	BMI_CATobese	1	0.00573342	111	1	0.459459	1.43492	2.26558	0.820076	2.76265
Oral	X6_205407	MURICA	MURICATRUE	1	0.00585332	379	0.95777	0.37467	0.512293	1.18456	0.429828	2.75589
Gastrointestinal tract	X6_104327	DSUBFED	DSUBFED	1	0.00611537	108	0.720396	0.805556	1.18299	1.49975	0.547047	2.74153
Gastrointestinal tract	X6_150369	DSUBFED	DSUBFED	1	0.00663558	108	0.807018	0.759259	1.18299	1.33518	0.491852	2.7146
Gastrointestinal tract	X7_214048	DSUBFED	DSUBFED	1	0.0069195	108	0.975908	0.611111	1.18299	1.1602	0.429595	2.70069
Oral	X6_213963	OCPTN_ST	OCPTN_STTRUE	1	0.00697474	77	0.697205	0.181818	1	-1.9723	0.731011	-2.69805
Gastrointestinal tract	X6_37664	DCMCODE_13	DCMCODE_13TRUE	1	0.00713298	46	0.77935	0.782609	0.688113	-2.36301	0.878257	-2.69057
Oral	X6_61889	BMI_CAT	BMI_CAToverweight	1	0.00791564	379	0.901142	0.686016	1.38997	-0.627282	0.236207	-2.65565
Gastrointestinal tract	X6_210288	BMI_CAT	BMI_CAToverweight	1	0.00910911	111	0.625998	0.153153	1.43492	-2.79068	1.07007	-2.60793
Oral	X6_69531	OCPTN_ST	OCPTN_STTRUE	1	0.00957686	77	0.98049	0.38961	1	-1.3533	0.52236	-2.59074
Oral	X6_113953	DSUDIET	DSUDIET	1	0.0103497	365	0.781379	0.769863	0.222786	-0.761788	0.297119	-2.56392
Oral	X6_39471	DSUDIET	DSUDIET	1	0.0109063	365	0.751513	0.786301	0.222786	-0.73674	0.289408	-2.54569
Gastrointestinal tract	X6_183699	DSUBFED	DSUBFED	1	0.0111074	108	0.636757	0.157407	1.18299	1.34166	0.52836	2.5393
Gastrointestinal tract	X7_213859	BMI_CAT	BMI_CAToverweight	1	0.0113213	111	0.974651	0.612613	1.43492	1.18063	0.466168	2.53262
Oral	X6_199448	OCPTN_ST	OCPTN_STTRUE	1	0.0119681	77	0.841852	0.74026	1	-1.55296	0.617949	-2.51308
Oral	X6_111258	OCPTN_ST	OCPTN_STTRUE	1	0.0121019	77	0.911497	0.688312	1	-1.43769	0.572977	-2.50916
Oral	X6_108247	OCPTN_ST	OCPTN_STTRUE	1	0.0124654	77	0.799368	0.233766	1	1.72465	0.690224	2.49869
Urogenital tract	X6_160917	BMI_CAT	BMI_CATobese	1	0.0128263	64	0.973668	0.375	1.45931	2.34648	0.942907	2.48856
Gastrointestinal tract	X6_73558	DCMCODE_13	DCMCODE_13TRUE	1	0.0133232	46	0.937734	0.673913	0.688113	-2.23814	0.904295	-2.47501
Gastrointestinal tract	X7_213859	OCPTN_ST	OCPTN_STTRUE	1	0.0141027	46	0.958712	0.652174	1	1.91188	0.778887	2.45464
Oral	X6_146554	BMI_CAT	BMI_CAToverweight	1	0.0145893	379	0.915484	0.672823	1.38997	-0.576285	0.235949	-2.44242
Gastrointestinal tract	X6_77027	OCPTN_ST	OCPTN_STTRUE	1	0.0154847	46	1	0.456522	1	1.68841	0.697446	2.42084
Gastrointestinal tract	X6_133809	BMI_CAT	BMI_CATobese	1	0.0155186	111	0.954704	0.36036	1.43492	1.49347	0.617125	2.42004
Oral	X6_57018	BMI_CAT	BMI_CAToverweight	1	0.0158611	379	0.898134	0.688654	1.38997	-0.580829	0.240799	-2.4121
Gastrointestinal tract	X6_57750	BMI_CAT	BMI_CAToverweight	1	0.016542	111	1	0.540541	1.43492	1.05144	0.438698	2.39673
Gastrointestinal tract	X6_63487	MURICA	MURICATRUE	1	0.017524	111	0.669225	0.171171	0.500955	-1.61533	0.679987	-2.37552
Oral	X6_57018	OCPTN_ST	OCPTN_STTRUE	1	0.0195911	77	0.841852	0.74026	1	-1.45955	0.625318	-2.33409
Oral	X6_33024	DSUBFED	DSUBFED	1	0.019598	365	0.666327	0.172603	1.31047	-0.574902	0.246321	-2.33396
Gastrointestinal tract	X6_71475	BMI_CAT	BMI_CAToverweight	1	0.0213192	111	0.910727	0.684685	1.43492	-1.05789	0.459498	-2.30228
Gastrointestinal tract	X6_165403	BMI_CAT	BMI_CAToverweight	1	0.0213229	111	0.76316	0.216216	1.43492	1.17968	0.512412	2.30222
Oral	X6_39457	BMI_CAT	BMI_CATobese	1	0.0219826	379	0.997662	0.543536	1.38997	-0.796049	0.347518	-2.29067
Oral	X6_61652	BMI_CAT	BMI_CAToverweight	1	0.0223421	379	0.984793	0.419525	1.38997	-0.523918	0.229336	-2.2845
Oral	X6_128085	DSUDIET	DSUDIET	1	0.0241781	365	1	0.473973	0.222786	-1.18145	0.524089	-2.25429
Gastrointestinal tract	X6_181184	DSUBFED	DSUBFED	1	0.0245946	108	0.680311	0.175926	1.18299	-1.17371	0.522182	-2.24771
Oral	X6_61652	OCPTN_ST	OCPTN_STTRUE	1	0.0256258	77	1	0.493506	1	-1.09296	0.489715	-2.23184
Gastrointestinal tract	X6_105476	OCPTN_ST	OCPTN_STTRUE	1	0.025767	46	1	0.456522	1	-1.49403	0.670057	-2.22971
Gastrointestinal tract	X6_85013	BMI_CAT	BMI_CATobese	1	0.0258088	111	1	0.468468	1.43492	1.43871	0.645427	2.22908
Airways	X6_109238	MURICA	MURICATRUE	1	0.0259732	92	0.210925	0.0326087	0.504173	-3.37008	1.51355	-2.22661
Airways	X6_97267	MURICA	MURICATRUE	1	0.0259732	92	0.210925	0.0326087	0.504173	-3.37008	1.51355	-2.22661
Oral	X6_127775	OCPTN_ST	OCPTN_STTRUE	1	0.0263568	77	0.53059	0.116883	1	2.52454	1.13671	2.22091
Gastrointestinal tract	X6_42014	BMI_CAT	BMI_CAToverweight	1	0.026785	111	0.411615	0.918919	1.43492	-1.84378	0.832544	-2.21464
Gastrointestinal tract	X6_75391	DSUBFED	DSUBFED	1	0.0269238	108	0.658986	0.166667	1.18299	1.11829	0.505416	2.21262
Gastrointestinal tract	X6_27580	BMI_CAT	BMI_CATobese	1	0.0270033	111	1	0.459459	1.43492	1.37389	0.621256	2.21147
Gastrointestinal tract	X6_44338	BMI_CAT	BMI_CATobese	1	0.0270497	111	0.980219	0.603604	1.43492	2.36243	1.06858	2.2108
Oral	X6_159261	DSUBFED	DSUBFED	1	0.0272854	365	0.735714	0.205479	1.31047	0.52158	0.236286	2.20741
Oral	X6_70847	BMI_CAT	BMI_CATobese	1	0.02777	379	0.850972	0.274406	1.38997	0.766845	0.348483	2.20052
Oral	X6_108247	EDLVL_BS	EDLVL_BSTRUE	1	0.0284675	44	0.83777	0.25	0.903424	-1.81292	0.827523	-2.19078
Gastrointestinal tract	X6_194092	OCPTN_ST	OCPTN_STTRUE	1	0.0286371	46	0.989588	0.608696	1	1.54045	0.703899	2.18845
Gastrointestinal tract	X6_205736	OCPTN_ST	OCPTN_STTRUE	1	0.0286371	46	0.989588	0.608696	1	1.54045	0.703899	2.18845
Oral	X6_105925	DSUDIET	DSUDIET	1	0.0287857	365	0.858108	0.279452	0.222786	0.631711	0.288926	2.18641
Oral	X6_26486	OCPTN_ST	OCPTN_STTRUE	1	0.032387	77	0.987808	0.597403	1	-1.09435	0.511472	-2.1396
Airways	X6_127818	MURICA	MURICATRUE	1	0.0326096	92	0.309787	0.0543478	0.504173	-2.77825	1.30016	-2.13686
Oral	X6_97267	DSUBFED	DSUBFED	1	0.033211	365	0.834582	0.736986	1.31047	-0.425224	0.199681	-2.12952
Gastrointestinal tract	X6_90887	BMI_CAT	BMI_CATobese	1	0.0335516	111	0.52813	0.117117	1.43492	1.49955	0.705533	2.12542
Oral	X6_58175	OCPTN_ST	OCPTN_STTRUE	1	0.0337333	77	0.667687	0.168831	1	-1.54018	0.725387	-2.12325
Oral	X6_72946	BMI_CAT	BMI_CAToverweight	1	0.0343417	379	0.989361	0.569921	1.38997	-0.474574	0.224275	-2.11604
Oral	X6_144816	MURICA	MURICATRUE	1	0.035557	379	0.639081	0.16095	0.512293	-0.789748	0.37572	-2.10196
Gastrointestinal tract	X6_57620	BMI_CAT	BMI_CAToverweight	1	0.0355741	111	0.779748	0.225225	1.43492	-1.2689	0.603732	-2.10176
Urogenital tract	X6_60213	BMI_CAT	BMI_CATobese	1	0.0363062	64	0.405114	0.078125	1.45931	2.67446	1.27752	2.09348
Gastrointestinal tract	X6_174427	BMI_CAT	BMI_CAToverweight	1	0.0363123	111	0.689564	0.18018	1.43492	1.10374	0.527242	2.09341
Oral	X6_37924	EDLVL_BS	EDLVL_BSTRUE	1	0.0370072	44	0.953511	0.659091	0.903424	-2.20492	1.05717	-2.08569
Gastrointestinal tract	X6_85444	BMI_CAT	BMI_CAToverweight	1	0.0381331	111	0.669225	0.828829	1.43492	-1.14701	0.553197	-2.07342
Gastrointestinal tract	X6_205736	DCMCODE_13	DCMCODE_13TRUE	1	0.038307	46	0.989588	0.608696	0.688113	-1.84535	0.890803	-2.07155
Oral	X6_91527	DSUBFED	DSUBFED	1	0.0408246	365	0.949959	0.364384	1.31047	0.380482	0.186027	2.04531
Oral	X6_196633	OCPTN_ST	OCPTN_STTRUE	1	0.0411467	77	0.725053	0.805195	1	-1.46919	0.71947	-2.04205
Gastrointestinal tract	X7_53884	BMI_CAT	BMI_CATobese	1	0.0415026	111	0.500955	0.891892	1.43492	-1.61007	0.789842	-2.03847
Oral	X6_69531	BMI_CAT	BMI_CATobese	1	0.0422986	379	0.898134	0.311346	1.38997	-0.833748	0.410598	-2.03057
Oral	X6_104618	DSUDIET	DSUDIET	1	0.0425942	365	0.999723	0.531507	0.222786	-0.680445	0.33558	-2.02767
Oral	X6_190669	BMI_CAT	BMI_CATobese	1	0.0428657	379	0.687237	0.817942	1.38997	-0.803842	0.396956	-2.02502
Oral	X7_81985	BMI_CAT	BMI_CAToverweight	1	0.0436337	379	0.994092	0.443272	1.38997	0.451788	0.223924	2.01759
Gastrointestinal tract	X6_97267	BMI_CAT	BMI_CATobese	1	0.0442132	111	0.442807	0.0900901	1.43492	1.9452	0.966768	2.01206
Gastrointestinal tract	X6_75391	BMI_CAT	BMI_CAToverweight	1	0.0443204	111	0.648049	0.162162	1.43492	1.16236	0.577987	2.01105
Airways	X6_188170	DSUBFED	DSUBFED	1	0.0446904	88	0.159384	0.0227273	1.36952	-3.45452	1.72076	-2.00756
Airways	X6_56657	DSUBFED	DSUBFED	1	0.0446904	88	0.159384	0.0227273	1.36952	-3.45452	1.72076	-2.00756
Airways	X6_65847	DSUBFED	DSUBFED	1	0.0446904	88	0.159384	0.0227273	1.36952	-3.45452	1.72076	-2.00756
Gastrointestinal tract	X6_27580	BMI_CAT	BMI_CAToverweight	1	0.04486	111	1	0.459459	1.43492	0.868481	0.432949	2.00597
Gastrointestinal tract	X6_208248	BMI_CAT	BMI_CATobese	1	0.04604	111	0.825497	0.252252	1.43492	1.19786	0.600422	1.99503
Oral	X6_36193	OCPTN_ST	OCPTN_STTRUE	1	0.0467579	77	0.725053	0.194805	1	-1.30636	0.656964	-1.98849
Gastrointestinal tract	X6_208248	DSUBFED	DSUBFED	1	0.0470208	108	0.836711	0.259259	1.18299	0.85765	0.431823	1.98611
Airways	X6_213320	BMI_CAT	BMI_CAToverweight	1	0.0472038	92	0.433354	0.0869565	1.44118	2.2909	1.15442	1.98447
Gastrointestinal tract	X6_77027	BMI_CAT	BMI_CATobese	1	0.0476707	111	0.989654	0.414414	1.43492	-1.59364	0.80475	-1.98029
Oral	X6_26759	BMI_CAT	BMI_CATobese	1	0.048102	379	0.936055	0.348285	1.38997	-0.801897	0.405722	-1.97647
Gastrointestinal tract	X6_146554	BMI_CAT	BMI_CAToverweight	1	0.0487714	111	0.852814	0.72973	1.43492	1.03355	0.524487	1.97058
Gastrointestinal tract	X6_140225	BMI_CAT	BMI_CAToverweight	1	0.0489447	111	0.500955	0.891892	1.43492	-1.29004	0.655149	-1.96907
Oral	X6_117494	DCMCODE_13	DCMCODE_13TRUE	1	0.0494515	80	0.735226	0.8	0.621261	-1.35985	0.692151	-1.96468
Gastrointestinal tract	X6_149327	BMI_CAT	BMI_CAToverweight	1	0.049648	111	0.52813	0.882883	1.43492	-1.28875	0.656527	-1.96298
Gastrointestinal tract	X6_76246	BMI_CAT	BMI_CAToverweight	1	0.0499198	111	0.442807	0.90991	1.43492	-1.65891	0.846104	-1.96065
Gastrointestinal tract	X6_49947	BMI_CAT	BMI_CAToverweight	1	0.0499943	111	0.472547	0.900901	1.43492	-1.42834	0.728741	-1.96001
Oral	X6_49238	EDLVL_BS	EDLVL_BSTRUE	1	0.050107	44	0.930381	0.318182	0.903424	-1.57784	0.805411	-1.95905
Gastrointestinal tract	X6_150972	DSUBFED	DSUBFED	1	0.0507703	108	0.564191	0.87037	1.18299	1.18955	0.608961	1.95342
Gastrointestinal tract	X6_135930	DSUBFED	DSUBFED	1	0.0514993	108	0.419717	0.916667	1.18299	1.46467	0.752158	1.9473
Airways	X6_26906	MURICA	MURICATRUE	1	0.0519739	92	0.210925	0.0326087	0.504173	-2.50844	1.29078	-1.94335
Gastrointestinal tract	X6_85774	OCPTN_ST	OCPTN_STTRUE	1	0.0520543	46	0.818534	0.76087	1	1.71399	0.88228	1.94268
Skin	X6_42014	DSUBFED	DSUBFED	1	0.0526568	23	0.70964	0.173913	1.55818	2.50018	1.29027	1.93772
Skin	X6_165971	DSUBFED	DSUBFED	1	0.0526568	23	0.70964	0.173913	1.55818	2.50018	1.29027	1.93772
Skin	X6_92260	DSUBFED	DSUBFED	1	0.0530197	23	0.70964	0.173913	1.55818	3.04452	1.57359	1.93476
Oral	X6_205297	OCPTN_ST	OCPTN_STTRUE	1	0.0530314	77	0.993736	0.415584	1	-0.956826	0.49457	-1.93467
Oral	X7_102617	BMI_CAT	BMI_CATobese	1	0.0533274	379	0.991386	0.435356	1.38997	0.667061	0.345223	1.93226
Airways	X6_190669	DSUBFED	DSUBFED	1	0.0539779	88	0.218415	0.0340909	1.36952	2.48917	1.29172	1.92701
Gastrointestinal tract	X6_118674	OCPTN_ST	OCPTN_STTRUE	1	0.0550116	46	0.735986	0.804348	1	1.7756	0.925378	1.91878
Gastrointestinal tract	X6_155466	BMI_CAT	BMI_CATobese	1	0.0555167	111	0.648049	0.162162	1.43492	1.30934	0.683798	1.91481
Oral	X6_119084	BMI_CAT	BMI_CATobese	1	0.055799	379	0.835707	0.263852	1.38997	-0.850832	0.444855	-1.9126
Gastrointestinal tract	X6_42437	OCPTN_ST	OCPTN_STTRUE	1	0.0559815	46	0.635305	0.847826	1	2.22919	1.1664	1.91118
Airways	X6_161782	OCPTN_ST	OCPTN_STTRUE	1	0.0564786	19	0.996792	0.631579	1	-2.3961	1.25626	-1.90732
Gastrointestinal tract	X6_152703	OCPTN_ST	OCPTN_STTRUE	1	0.056794	46	0.77935	0.217391	1	1.5572	0.817475	1.90489
Oral	X6_36135	BMI_CAT	BMI_CATobese	1	0.0567983	379	0.606585	0.147757	1.38997	-1.22066	0.640813	-1.90486
Airways	X6_103412	MURICA	MURICATRUE	1	0.0568336	92	0.504173	0.108696	0.504173	-1.62225	0.851759	-1.90459
Oral	X6_90481	DSUDIET	DSUDIET	1	0.057097	365	0.746312	0.789041	0.222786	-0.550763	0.289484	-1.90257
Gastrointestinal tract	X6_118862	MURICA	MURICATRUE	1	0.0579742	111	0.968538	0.621622	0.500955	-2.02305	1.06707	-1.89589
Oral	X7_102617	EDLVL_BS	EDLVL_BSTRUE	1	0.0585064	44	1	0.477273	0.903424	1.70518	0.901311	1.89188
Oral	X6_93460	MURICA	MURICATRUE	1	0.0587372	379	0.928679	0.340369	0.512293	-0.64023	0.338718	-1.89016
Oral	X6_119756	BMI_CAT	BMI_CATobese	1	0.0588043	379	0.835707	0.263852	1.38997	0.684397	0.362181	1.88965
Gastrointestinal tract	X6_145397	BMI_CAT	BMI_CATobese	1	0.0588161	111	0.996554	0.567568	1.43492	1.32002	0.698582	1.88957
Gastrointestinal tract	X6_147771	OCPTN_ST	OCPTN_STTRUE	1	0.0589323	46	0.688113	0.173913	1	1.74672	0.924827	1.8887
Oral	X6_113993	DCMCODE_13	DCMCODE_13TRUE	1	0.0600567	80	0.99205	0.5875	0.621261	-1.25276	0.66623	-1.88038
Airways	X6_61956	BMI_CAT	BMI_CAToverweight	1	0.0605409	92	0.353708	0.0652174	1.44118	2.10558	1.12188	1.87683
Skin	X6_161782	DSUBFED	DSUBFED	1	0.0605876	23	1	0.478261	1.55818	-2.4186	1.2889	-1.87649
Gastrointestinal tract	X6_146554	MURICA	MURICATRUE	1	0.0606471	111	0.852814	0.72973	0.500955	1.17885	0.628363	1.87606
Airways	X6_52811	BMI_CAT	BMI_CATobese	1	0.0619628	92	0.504173	0.108696	1.44118	1.86992	1.0018	1.86656
Oral	X6_159659	DCMCODE_13	DCMCODE_13TRUE	1	0.062105	80	0.99205	0.5875	0.621261	-1.23512	0.662069	-1.86555
Oral	X7_102617	DCMCODE_13	DCMCODE_13TRUE	1	0.062105	80	0.99205	0.4125	0.621261	1.23512	0.662069	1.86555
Oral	X6_154692	BMI_CAT	BMI_CATobese	1	0.062823	379	0.725799	0.799472	1.38997	-0.733701	0.394369	-1.86044
Oral	X6_139150	BMI_CAT	BMI_CAToverweight	1	0.0629006	379	0.984793	0.580475	1.38997	-0.41759	0.224524	-1.85989
Gastrointestinal tract	X6_120400	MURICA	MURICATRUE	1	0.0629124	111	0.996554	0.567568	0.500955	-1.49292	0.802727	-1.85981
Gastrointestinal tract	X6_199642	BMI_CAT	BMI_CATobese	1	0.0642849	111	0.554155	0.126126	1.43492	1.42381	0.769543	1.8502
Airways	X6_148764	MURICA	MURICATRUE	1	0.065523	92	0.924792	0.326087	0.504173	-1.31085	0.711773	-1.84167
Oral	X6_56043	MURICA	MURICATRUE	1	0.0655655	379	0.65155	0.833773	0.512293	0.710876	0.386056	1.84138
Oral	X6_37895	DSUBFED	DSUBFED	1	0.0663065	365	1	0.520548	1.31047	-0.327088	0.178119	-1.83635
Oral	X6_111258	EDLVL_BS	EDLVL_BSTRUE	1	0.0664157	44	0.930381	0.681818	0.903424	-2.12043	1.15516	-1.83561
Oral	X6_127775	MURICA	MURICATRUE	1	0.0669791	379	0.56493	0.131926	0.512293	1.87897	1.02574	1.83181
Airways	X6_96390	MURICA	MURICATRUE	1	0.0670086	92	0.353708	0.0652174	0.504173	-1.96203	1.0712	-1.83162
Oral	X6_208903	DSUDIET	DSUDIET	1	0.0670983	365	0.893029	0.693151	0.222786	-0.526375	0.287477	-1.83102
Gastrointestinal tract	X6_128085	BMI_CAT	BMI_CAToverweight	1	0.0677126	111	0.985228	0.405405	1.43492	-0.832066	0.455449	-1.82691
Oral	X6_209274	DSUBFED	DSUBFED	1	0.0677444	365	0.896235	0.309589	1.31047	0.348998	0.191054	1.8267
Gastrointestinal tract	X6_56715	MURICA	MURICATRUE	1	0.0679365	111	0.442807	0.0900901	0.500955	-1.42858	0.782598	-1.82543
Skin	X6_148764	DSUBFED	DSUBFED	1	0.0679984	23	0.937186	0.304348	1.55818	-2.2043	1.20782	-1.82502
Gastrointestinal tract	X6_123414	BMI_CAT	BMI_CATobese	1	0.0682625	111	1	0.468468	1.43492	1.11231	0.610066	1.82327
Oral	X6_103412	OCPTN_ST	OCPTN_STTRUE	1	0.0684382	77	1	0.467532	1	-0.883333	0.484785	-1.82211
Oral	X6_212883	EDLVL_BS	EDLVL_BSTRUE	1	0.0690191	44	0.953511	0.340909	0.903424	-1.44999	0.797446	-1.81829
Oral	X6_67816	OCPTN_ST	OCPTN_STTRUE	1	0.0700177	77	0.962146	0.363636	1	-0.916291	0.505736	-1.8118
Gastrointestinal tract	X6_39471	DSUBFED	DSUBFED	1	0.0701071	108	0.757272	0.787037	1.18299	0.960009	0.530035	1.81122
Airways	X6_30726	DSUBFED	DSUBFED	1	0.0716877	88	0.218415	0.0340909	1.36952	-2.77064	1.53831	-1.8011
Airways	X6_67001	DSUBFED	DSUBFED	1	0.0716877	88	0.218415	0.0340909	1.36952	-2.77064	1.53831	-1.8011
Airways	X6_107496	DSUBFED	DSUBFED	1	0.0725447	88	0.271564	0.0454545	1.36952	1.89282	1.05409	1.79568
Airways	X6_92939	DSUBFED	DSUBFED	1	0.0725447	88	0.271564	0.0454545	1.36952	1.89282	1.05409	1.79568
Airways	X6_118862	DSUBFED	DSUBFED	1	0.0725447	88	0.271564	0.0454545	1.36952	1.89282	1.05409	1.79568
Oral	X6_91953	OCPTN_ST	OCPTN_STTRUE	1	0.0731116	77	0.861125	0.272727	1	-0.993078	0.554132	-1.79213
Gastrointestinal tract	X6_90688	BMI_CAT	BMI_CATobese	1	0.0732878	111	0.900289	0.693694	1.43492	1.92251	1.07341	1.79103
Urogenital tract	X6_177585	DSUBFED	DSUBFED	1	0.0733502	64	0.279733	0.046875	1.19836	-2.23548	1.24842	-1.79065
Gastrointestinal tract	X6_202842	BMI_CAT	BMI_CAToverweight	1	0.0734462	111	0.648049	0.837838	1.43492	1.21793	0.680391	1.79005
Gastrointestinal tract	X6_56347	BMI_CAT	BMI_CAToverweight	1	0.0735466	111	0.727858	0.801802	1.43492	-0.934931	0.522476	-1.78942
Oral	X6_61889	DSUBFED	DSUBFED	1	0.073821	365	0.911508	0.676712	1.31047	-0.338396	0.189289	-1.78772
Gastrointestinal tract	X6_111812	MURICA	MURICATRUE	1	0.0748344	111	0.472547	0.900901	0.500955	1.36751	0.767626	1.78148
Urogenital tract	X6_107860	MURICA	MURICATRUE	1	0.0751054	64	0.205676	0.03125	0.405114	-2.6997	1.51684	-1.77982
Gastrointestinal tract	X6_65847	DCMCODE_13	DCMCODE_13TRUE	1	0.0755802	46	1	0.456522	0.688113	-2.02749	1.14101	-1.77693
Gastrointestinal tract	X6_89989	DSUBFED	DSUBFED	1	0.075672	108	1	0.472222	1.18299	0.680101	0.38286	1.77637
Airways	X6_92260	DSUBFED	DSUBFED	1	0.0757098	88	0.218415	0.0340909	1.36952	2.13029	1.19939	1.77614
Oral	X6_63870	OCPTN_ST	OCPTN_STTRUE	1	0.0760555	77	1	0.493506	1	-0.856653	0.482881	-1.77405
Urogenital tract	X6_173132	DSUBFED	DSUBFED	1	0.0763583	64	0.712301	0.1875	1.19836	1.18687	0.669711	1.77222
Oral	X6_184628	BMI_CAT	BMI_CATobese	1	0.0766052	379	0.645352	0.163588	1.38997	-1.1163	0.630416	-1.77073
Oral	X6_135880	BMI_CAT	BMI_CATobese	1	0.0766399	379	0.632736	0.158311	1.38997	-1.11622	0.630448	-1.77052
Gastrointestinal tract	X6_149008	OCPTN_ST	OCPTN_STTRUE	1	0.0766435	46	0.998196	0.413043	1	-1.17839	0.665566	-1.7705
Gastrointestinal tract	X6_98694	OCPTN_ST	OCPTN_STTRUE	1	0.0768797	46	0.913278	0.304348	1	-1.34078	0.757896	-1.76908
Oral	X6_104618	EDLVL_BS	EDLVL_BSTRUE	1	0.0769016	44	0.987731	0.613636	0.903424	-1.60565	0.907684	-1.76895
Oral	X6_99002	DSUDIET	DSUDIET	1	0.0781674	365	0.751513	0.213699	0.222786	0.526106	0.298683	1.76142
Gastrointestinal tract	X6_110310	DCMCODE_13	DCMCODE_13TRUE	1	0.0783952	46	1	0.434783	0.688113	-1.97705	1.12327	-1.76007
Gastrointestinal tract	X6_95845	OCPTN_ST	OCPTN_STTRUE	1	0.078597	46	0.937734	0.673913	1	1.27328	0.723916	1.75889
Oral	X6_213963	BMI_CAT	BMI_CATobese	1	0.0787212	379	0.692943	0.184697	1.38997	-0.89659	0.509961	-1.75815
Gastrointestinal tract	X6_17925	DCMCODE_13	DCMCODE_13TRUE	1	0.0788202	46	0.958712	0.652174	0.688113	-1.4458	0.822613	-1.75757
Urogenital tract	X6_25913	BMI_CAT	BMI_CAToverweight	1	0.0798085	64	0.556422	0.125	1.45931	1.66846	0.952425	1.7518
Gastrointestinal tract	X6_149008	DCMCODE_13	DCMCODE_13TRUE	1	0.0799563	46	0.998196	0.413043	0.688113	-1.99847	1.14137	-1.75094
Oral	X6_105225	BMI_CAT	BMI_CAToverweight	1	0.0804639	379	0.961591	0.379947	1.38997	-0.406874	0.232765	-1.748
Urogenital tract	X6_36135	BMI_CAT	BMI_CAToverweight	1	0.0822575	64	0.509889	0.109375	1.45931	1.65547	0.952657	1.73774
Gastrointestinal tract	X6_59371	OCPTN_ST	OCPTN_STTRUE	1	0.0829874	46	0.77935	0.217391	1	1.37814	0.794955	1.73361
Oral	X6_158611	EDLVL_BS	EDLVL_BSTRUE	1	0.0830187	44	0.59435	0.136364	0.903424	-1.79693	1.03663	-1.73343
Gastrointestinal tract	X6_105916	MURICA	MURICATRUE	1	0.0835639	111	1	0.495495	0.500955	1.20733	0.697727	1.73037
Gastrointestinal tract	X6_121134	OCPTN_ST	OCPTN_STTRUE	1	0.0838555	46	0.958712	0.652174	1	-1.14783	0.663969	-1.72874
Gastrointestinal tract	X6_107860	OCPTN_ST	OCPTN_STTRUE	1	0.0838555	46	0.958712	0.347826	1	1.14783	0.663969	1.72874
Oral	X6_56043	OCPTN_ST	OCPTN_STTRUE	1	0.0839949	77	0.725053	0.805195	1	-1.13135	0.654728	-1.72796
Oral	X6_26906	BMI_CAT	BMI_CATobese	1	0.0844825	379	0.780238	0.770449	1.38997	-0.659191	0.382085	-1.72525
Oral	X6_63870	DCMCODE_13	DCMCODE_13TRUE	1	0.0848956	80	1	0.4875	0.621261	-1.22616	0.711659	-1.72296
Oral	X6_39471	MURICA	MURICATRUE	1	0.0853468	379	0.756388	0.783641	0.512293	0.610231	0.354688	1.72047
Gastrointestinal tract	X6_69531	BMI_CAT	BMI_CAToverweight	1	0.0860189	111	0.920609	0.324324	1.43492	0.753745	0.439045	1.71678
Gastrointestinal tract	X6_94538	BMI_CAT	BMI_CAToverweight	1	0.086199	111	0.929943	0.333333	1.43492	0.754999	0.440028	1.7158
Gastrointestinal tract	X6_184881	BMI_CAT	BMI_CATobese	1	0.0864075	111	0.839464	0.261261	1.43492	1.09129	0.636449	1.71466
Oral	X6_128749	DCMCODE_13	DCMCODE_13TRUE	1	0.0868284	80	0.880927	0.7125	0.621261	-1.10462	0.64508	-1.71237
Oral	X6_196633	MURICA	MURICATRUE	1	0.086938	379	0.698582	0.812665	0.512293	0.630377	0.368259	1.71178
Oral	X6_85044	OCPTN_ST	OCPTN_STTRUE	1	0.0869468	77	1	0.506494	1	-0.828674	0.484115	-1.71173
Gastrointestinal tract	X6_116067	DCMCODE_13	DCMCODE_13TRUE	1	0.0869846	46	0.635305	0.847826	0.688113	-1.56514	0.914474	-1.71152
Gastrointestinal tract	X6_157252	OCPTN_ST	OCPTN_STTRUE	1	0.0873157	46	0.735986	0.804348	1	1.55601	0.910092	1.70973
Airways	X6_39471	DSUBFED	DSUBFED	1	0.0873578	88	0.271564	0.0454545	1.36952	1.64085	0.959837	1.7095
Gastrointestinal tract	X6_113649	MURICA	MURICATRUE	1	0.0881548	111	0.889288	0.702703	0.500955	1.08376	0.635555	1.70521
Oral	X6_179701	DSUDIET	DSUDIET	1	0.0885272	365	0.911508	0.323288	0.222786	-0.893596	0.524651	-1.70322
Gastrointestinal tract	X6_44338	DCMCODE_13	DCMCODE_13TRUE	1	0.0889624	46	1	0.543478	0.688113	-1.50419	0.884351	-1.7009
Oral	X6_97267	EDLVL_BS	EDLVL_BSTRUE	1	0.0889839	44	0.707067	0.818182	0.903424	1.59939	0.940387	1.70078
Gastrointestinal tract	X6_111812	DSUBFED	DSUBFED	1	0.0904933	108	0.45138	0.907407	1.18299	1.16418	0.687722	1.6928
Oral	X6_60213	OCPTN_ST	OCPTN_STTRUE	1	0.0906287	77	0.568004	0.12987	1	-1.4347	0.847887	-1.69209
Skin	X6_30143	DSUBFED	DSUBFED	1	0.0906304	23	0.97934	0.347826	1.55818	-1.61441	0.954097	-1.69208
Oral	X6_62025	EDLVL_BS	EDLVL_BSTRUE	1	0.0915872	44	0.707067	0.818182	0.903424	-2.14345	1.2705	-1.68708
Skin	X7_53884	DSUBFED	DSUBFED	1	0.0915912	23	0.802859	0.217391	1.55818	1.81754	1.07734	1.68706
Oral	X6_17925	OCPTN_ST	OCPTN_STTRUE	1	0.0916032	77	0.962146	0.363636	1	-0.852618	0.505404	-1.687
Urogenital tract	X6_57668	MURICA	MURICATRUE	1	0.0930088	64	0.205676	0.03125	0.405114	-2.67415	1.59201	-1.67974
Gastrointestinal tract	X6_39471	BMI_CAT	BMI_CAToverweight	1	0.0931368	111	0.745871	0.792793	1.43492	0.973491	0.579777	1.67908
Airways	X6_53818	DSUBFED	DSUBFED	1	0.0935475	88	0.584465	0.136364	1.36952	0.94109	0.561183	1.67697
Gastrointestinal tract	X6_97267	BMI_CAT	BMI_CAToverweight	1	0.0946653	111	0.442807	0.0900901	1.43492	1.44569	0.865015	1.67129
Airways	X6_165971	BMI_CAT	BMI_CAToverweight	1	0.0948037	92	0.724589	0.195652	1.44118	-1.08285	0.648189	-1.67058
Oral	X6_92251	DSUBFED	DSUBFED	1	0.0958321	365	0.585919	0.139726	1.31047	-0.430774	0.25866	-1.6654
Gastrointestinal tract	X6_84398	DCMCODE_13	DCMCODE_13TRUE	1	0.0964188	46	1	0.456522	0.688113	1.47786	0.888953	1.66247
Oral	X6_159048	MURICA	MURICATRUE	1	0.0966754	379	0.557688	0.129288	0.512293	1.23362	0.74261	1.66119
Gastrointestinal tract	X6_196806	BMI_CAT	BMI_CAToverweight	1	0.0973304	111	0.825497	0.252252	1.43492	-0.875125	0.52784	-1.65794
Gastrointestinal tract	X6_95845	BMI_CAT	BMI_CATobese	1	0.0977073	111	0.974651	0.612613	1.43492	-1.0124	0.611325	-1.65607
Gastrointestinal tract	X6_85519	MURICA	MURICATRUE	1	0.0986478	111	0.500955	0.891892	0.500955	1.25614	0.76063	1.65144
Gastrointestinal tract	X6_134746	DSUBFED	DSUBFED	1	0.0987058	108	0.739221	0.796296	1.18299	0.784491	0.475115	1.65116
Gastrointestinal tract	X6_61652	BMI_CAT	BMI_CAToverweight	1	0.0988394	111	0.411615	0.918919	1.43492	1.79387	1.08686	1.65051
Oral	X6_109255	DSUBFED	DSUBFED	1	0.0988762	365	0.678612	0.178082	1.31047	0.404125	0.244876	1.65033
Skin	X6_127818	OCPTN_ST	OCPTN_STTRUE	1	0.099165	13	1	0.461538	1	-2.30259	1.39642	-1.64892
Skin	X6_52811	OCPTN_ST	OCPTN_STTRUE	1	0.099165	13	1	0.461538	1	-2.30259	1.39642	-1.64892
Skin	X6_92939	OCPTN_ST	OCPTN_STTRUE	1	0.099165	13	1	0.461538	1	-2.30259	1.39642	-1.64892
Skin	X6_25913	OCPTN_ST	OCPTN_STTRUE	1	0.099165	13	1	0.461538	1	2.30259	1.39642	1.64892
Oral	X6_17925	MURICA	MURICATRUE	1	0.0991768	379	0.907018	0.319261	0.512293	0.649391	0.393843	1.64886
Oral	X6_58645	BMI_CAT	BMI_CAToverweight	1	0.0998844	379	0.898134	0.688654	1.38997	-0.394781	0.239928	-1.64541
Airways	X6_99853	DSUBFED	DSUBFED	1	0.100402	88	0.32029	0.0568182	1.36952	1.56233	0.950956	1.64291
Gastrointestinal tract	X6_57750	DSUBFED	DSUBFED	1	0.100731	108	1	0.537037	1.18299	-0.624495	0.380483	-1.64132
Oral	X6_58175	BMI_CAT	BMI_CAToverweight	1	0.10098	379	0.557688	0.129288	1.38997	-0.579713	0.353458	-1.64012
Gastrointestinal tract	X6_187059	BMI_CAT	BMI_CAToverweight	1	0.101161	111	0.76316	0.783784	1.43492	0.925438	0.564549	1.63925
Airways	X6_52811	BMI_CAT	BMI_CAToverweight	1	0.101655	92	0.504173	0.108696	1.44118	1.447	0.883996	1.63688
Gastrointestinal tract	X6_142856	MURICA	MURICATRUE	1	0.10257	111	1	0.522523	0.500955	-1.1405	0.698611	-1.63252
Oral	X6_144765	DCMCODE_13	DCMCODE_13TRUE	1	0.102954	80	1	0.475	0.621261	-1.15704	0.709539	-1.6307
Gastrointestinal tract	X6_57620	OCPTN_ST	OCPTN_STTRUE	1	0.103687	46	0.688113	0.173913	1	1.49507	0.918777	1.62723
Gastrointestinal tract	X6_75619	OCPTN_ST	OCPTN_STTRUE	1	0.103752	46	0.577004	0.130435	1	-1.9116	1.17497	-1.62693
Oral	X6_146554	DSUDIET	DSUDIET	1	0.1042	365	0.911508	0.676712	0.222786	-0.4662	0.286923	-1.62482
Gastrointestinal tract	X6_137666	DSUBFED	DSUBFED	1	0.104238	108	0.510338	0.888889	1.18299	1.04677	0.644308	1.62465
Gastrointestinal tract	X6_196806	OCPTN_ST	OCPTN_STTRUE	1	0.104752	46	0.913278	0.304348	1	-1.19147	0.73446	-1.62224
Gastrointestinal tract	X6_114478	DSUBFED	DSUBFED	1	0.105443	108	0.613582	0.148148	1.18299	-0.88118	0.544268	-1.61902
Oral	X6_90481	DSUBFED	DSUBFED	1	0.106313	365	0.746312	0.789041	1.31047	-0.342712	0.212207	-1.61499
Gastrointestinal tract	X6_134746	BMI_CAT	BMI_CAToverweight	1	0.106583	111	0.745871	0.792793	1.43492	-0.79505	0.492674	-1.61375
Oral	X6_156982	DSUDIET	DSUDIET	1	0.106754	365	0.766729	0.778082	0.222786	-0.46782	0.290039	-1.61296
Oral	X6_62357	BMI_CAT	BMI_CATobese	1	0.107751	379	0.61324	0.150396	1.38997	-1.01483	0.630963	-1.60839
Gastrointestinal tract	X6_85013	DSUBFED	DSUBFED	1	0.108151	108	1	0.481481	1.18299	-0.611387	0.380557	-1.60656
Oral	X6_90481	BMI_CAT	BMI_CAToverweight	1	0.108284	379	0.746436	0.788918	1.38997	-0.436001	0.271491	-1.60595
Oral	X6_154692	BMI_CAT	BMI_CAToverweight	1	0.108321	379	0.725799	0.799472	1.38997	-0.449764	0.28009	-1.60579
Airways	X6_153897	DSUBFED	DSUBFED	1	0.109788	88	0.32029	0.0568182	1.36952	1.27044	0.794447	1.59914
Airways	X6_61956	DSUBFED	DSUBFED	1	0.109788	88	0.32029	0.0568182	1.36952	1.27044	0.794447	1.59914
Airways	X7_53884	MURICA	MURICATRUE	1	0.109921	92	0.153772	0.0217391	0.504173	-2.78483	1.7421	-1.59855
Oral	X6_85545	DSUBFED	DSUBFED	1	0.110049	365	0.842644	0.268493	1.31047	0.326052	0.204041	1.59797
Oral	X6_24671	DCMCODE_13	DCMCODE_13TRUE	1	0.110256	80	0.896936	0.3	0.621261	1.02129	0.63949	1.59704
Oral	X6_213963	BMI_CAT	BMI_CAToverweight	1	0.110457	379	0.692943	0.184697	1.38997	-0.470866	0.295003	-1.59614
Oral	X6_66152	BMI_CAT	BMI_CAToverweight	1	0.110563	379	0.907018	0.680739	1.38997	-0.378172	0.237	-1.59567
Oral	X6_104618	DCMCODE_13	DCMCODE_13TRUE	1	0.110937	80	1	0.55	0.621261	-1.05323	0.660748	-1.594
Airways	X6_69184	BMI_CAT	BMI_CATobese	1	0.111151	92	0.262466	0.0434783	1.44118	2.05515	1.29008	1.59304
Oral	X6_125450	DSUDIET	DSUDIET	1	0.111388	365	0.702298	0.810959	0.222786	-0.472721	0.296938	-1.59198
Oral	X6_213963	DSUBFED	DSUBFED	1	0.11267	365	0.702298	0.189041	1.31047	-0.380697	0.23999	-1.58631
Oral	X6_56668	OCPTN_ST	OCPTN_STTRUE	1	0.113422	77	1	0.506494	1	-0.76119	0.480854	-1.583
Oral	X6_184628	OCPTN_ST	OCPTN_STTRUE	1	0.113517	77	0.751314	0.207792	1	-0.975109	0.616152	-1.58258
Oral	X6_99002	DSUBFED	DSUBFED	1	0.114207	365	0.751513	0.213699	1.31047	-0.354324	0.224318	-1.57956
Gastrointestinal tract	X7_125528	BMI_CAT	BMI_CATobese	1	0.114429	111	0.889288	0.297297	1.43492	0.963406	0.610294	1.57859
Gastrointestinal tract	X6_116571	BMI_CAT	BMI_CATobese	1	0.114438	111	1	0.468468	1.43492	-1.01421	0.642491	-1.57855
Gastrointestinal tract	X6_152703	BMI_CAT	BMI_CATobese	1	0.114474	111	0.76316	0.216216	1.43492	1.14681	0.726564	1.5784
Oral	X6_158772	BMI_CAT	BMI_CAToverweight	1	0.114683	379	0.741369	0.791557	1.38997	-0.428898	0.271886	-1.57749
Oral	X6_60213	MURICA	MURICATRUE	1	0.115419	379	0.61324	0.150396	0.512293	0.973924	0.61864	1.5743
Airways	X6_148764	BMI_CAT	BMI_CAToverweight	1	0.115778	92	0.924792	0.326087	1.44118	0.764419	0.486041	1.57275
Airways	X6_165971	BMI_CAT	BMI_CATobese	1	0.115931	92	0.724589	0.195652	1.44118	-1.7649	1.12265	-1.57208
Gastrointestinal tract	X6_69531	OCPTN_ST	OCPTN_STTRUE	1	0.117344	46	1	0.456522	1	0.991343	0.633034	1.56602
Airways	X6_56043	BMI_CAT	BMI_CATobese	1	0.117422	92	0.309787	0.0543478	1.44118	2.02804	1.29531	1.56569
Airways	X6_81136	DSUBFED	DSUBFED	1	0.117949	88	0.32029	0.0568182	1.36952	-2.14852	1.37423	-1.56344
Airways	X6_61956	MURICA	MURICATRUE	1	0.118022	92	0.353708	0.0652174	0.504173	-1.56638	1.00208	-1.56313
Oral	X6_97267	BMI_CAT	BMI_CATobese	1	0.118287	379	0.835707	0.736148	1.38997	0.735516	0.470879	1.56201
Gastrointestinal tract	X6_139761	OCPTN_ST	OCPTN_STTRUE	1	0.119525	46	0.635305	0.152174	1	-1.78825	1.14869	-1.55677
Oral	X6_119756	BMI_CAT	BMI_CAToverweight	1	0.119703	379	0.835707	0.263852	1.38997	0.39797	0.255761	1.55602
Oral	X6_63853	DSUDIET	DSUDIET	1	0.119987	365	0.914412	0.673973	0.222786	-0.445896	0.286781	-1.55483
Oral	X6_125450	BMI_CAT	BMI_CAToverweight	1	0.12015	379	0.698582	0.812665	1.38997	-0.440836	0.283652	-1.55415
Skin	X6_144884	OCPTN_ST	OCPTN_STTRUE	1	0.120263	13	0.970951	0.307692	1	-2.19722	1.41421	-1.55367
Skin	X6_153897	OCPTN_ST	OCPTN_STTRUE	1	0.120263	13	0.970951	0.307692	1	-2.19722	1.41421	-1.55367
Skin	X6_36135	OCPTN_ST	OCPTN_STTRUE	1	0.120263	13	1	0.615385	1	2.19722	1.41421	1.55367
Skin	X6_39471	OCPTN_ST	OCPTN_STTRUE	1	0.120263	13	1	0.384615	1	-2.19722	1.41421	-1.55367
Skin	X6_84465	OCPTN_ST	OCPTN_STTRUE	1	0.120263	13	0.970951	0.307692	1	-2.19722	1.41421	-1.55367
Oral	X6_30161	OCPTN_ST	OCPTN_STTRUE	1	0.120421	77	1	0.454545	1	-0.749201	0.48242	-1.55301
Oral	X6_156982	DSUBFED	DSUBFED	1	0.12206	365	0.766729	0.778082	1.31047	-0.320098	0.207024	-1.54619
Oral	X6_144765	MURICA	MURICATRUE	1	0.122372	379	0.994092	0.443272	0.512293	0.53284	0.344904	1.54489
Gastrointestinal tract	X6_211540	MURICA	MURICATRUE	1	0.122493	111	0.999951	0.45045	0.500955	1.09356	0.708083	1.54439
Gastrointestinal tract	X6_189038	OCPTN_ST	OCPTN_STTRUE	1	0.122991	46	1	0.478261	1	0.987991	0.64058	1.54234
Gastrointestinal tract	X7_125528	DCMCODE_13	DCMCODE_13TRUE	1	0.123161	46	0.97611	0.369565	0.688113	-1.75208	1.1365	-1.54164
Oral	X6_117494	BMI_CAT	BMI_CAToverweight	1	0.123433	379	0.784836	0.76781	1.38997	-0.405152	0.262997	-1.54052
Oral	X6_195894	DCMCODE_13	DCMCODE_13TRUE	1	0.123473	80	0.970205	0.375	0.621261	-1.25276	0.813293	-1.54036
Oral	X6_63870	DSUDIET	DSUDIET	1	0.123875	365	0.973053	0.39726	0.222786	-0.600756	0.390428	-1.53871
Gastrointestinal tract	X6_144436	OCPTN_ST	OCPTN_STTRUE	1	0.125037	46	0.913278	0.304348	1	1.10007	0.717137	1.53397
Oral	X6_139150	DSUBFED	DSUBFED	1	0.125528	365	0.991603	0.564384	1.31047	-0.273253	0.178366	-1.53198
Urogenital tract	X6_62357	BMI_CAT	BMI_CAToverweight	1	0.126023	64	0.509889	0.109375	1.45931	1.51199	0.988246	1.52997
Urogenital tract	X6_84702	MURICA	MURICATRUE	1	0.12614	64	0.279733	0.046875	0.405114	-2.08752	1.36483	-1.5295
Oral	X6_36193	DSUBFED	DSUBFED	1	0.126699	365	0.556333	0.128767	1.31047	0.404941	0.265144	1.52725
Airways	X6_107346	DSUBFED	DSUBFED	1	0.126743	88	0.32029	0.0568182	1.36952	-1.62804	1.06612	-1.52707
Airways	X6_213320	BMI_CAT	BMI_CATobese	1	0.127001	92	0.433354	0.0869565	1.44118	1.99574	1.3078	1.52603
Gastrointestinal tract	X6_213905	BMI_CAT	BMI_CAToverweight	1	0.127031	111	0.709098	0.189189	1.43492	0.811631	0.531898	1.52592
Gastrointestinal tract	X6_97505	MURICA	MURICATRUE	1	0.127887	111	0.974651	0.612613	0.500955	-1.22706	0.805956	-1.52249
Airways	X6_71275	DSUBFED	DSUBFED	1	0.127962	88	0.218415	0.0340909	1.36952	-2.17454	1.42856	-1.52219
Gastrointestinal tract	X6_100105	BMI_CAT	BMI_CATobese	1	0.128363	111	0.920609	0.675676	1.43492	1.2315	0.80988	1.52059
Airways	X6_39457	DSUBFED	DSUBFED	1	0.128984	88	0.365449	0.0681818	1.36952	-1.51174	0.995794	-1.51812
Gastrointestinal tract	X6_205736	DSUBFED	DSUBFED	1	0.12921	108	1	0.527778	1.18299	0.573335	0.377884	1.51723
Gastrointestinal tract	X6_122057	MURICA	MURICATRUE	1	0.129283	111	0.961888	0.369369	0.500955	1.22165	0.805343	1.51693
Oral	X6_153897	DCMCODE_13	DCMCODE_13TRUE	1	0.129817	80	0.343878	0.9375	0.621261	-1.48393	0.979604	-1.51482
Skin	X6_211583	DSUBFED	DSUBFED	1	0.130082	23	0.595609	0.130435	1.55818	1.87906	1.2413	1.51378
Skin	X6_26906	DSUBFED	DSUBFED	1	0.130082	23	0.595609	0.130435	1.55818	1.87906	1.2413	1.51378
Skin	X6_67001	DSUBFED	DSUBFED	1	0.130082	23	0.595609	0.130435	1.55818	1.87906	1.2413	1.51378
Oral	X6_104115	DSUBFED	DSUBFED	1	0.130458	365	0.800055	0.241096	1.31047	0.315549	0.208655	1.5123
Gastrointestinal tract	X6_76246	DSUBFED	DSUBFED	1	0.130528	108	0.45138	0.907407	1.18299	0.999746	0.661197	1.51202
Gastrointestinal tract	X6_33024	OCPTN_ST	OCPTN_STTRUE	1	0.130685	46	0.989588	0.608696	1	-0.997602	0.660048	-1.51141
Gastrointestinal tract	X6_31735	BMI_CAT	BMI_CAToverweight	1	0.13081	111	1	0.513514	1.43492	0.644243	0.426393	1.51091
Gastrointestinal tract	X6_188170	BMI_CAT	BMI_CAToverweight	1	0.131935	111	0.968538	0.621622	1.43492	-0.645373	0.428387	-1.50652
Gastrointestinal tract	X6_85013	MURICA	MURICATRUE	1	0.132173	111	1	0.468468	0.500955	1.05198	0.698716	1.50559
Oral	X6_153831	BMI_CAT	BMI_CAToverweight	1	0.132412	379	0.715106	0.195251	1.38997	-0.443669	0.294864	-1.50466
Airways	X6_104120	DSUBFED	DSUBFED	1	0.132549	88	0.365449	0.0681818	1.36952	1.33694	0.888848	1.50413
Airways	X6_181184	MURICA	MURICATRUE	1	0.133833	92	0.806158	0.23913	0.504173	-1.10831	0.739293	-1.49916
Oral	X6_26486	BMI_CAT	BMI_CATobese	1	0.134242	379	0.975157	0.598945	1.38997	-0.517581	0.345611	-1.49758
Gastrointestinal tract	X6_161782	MURICA	MURICATRUE	1	0.135578	111	0.669225	0.171171	0.500955	-1.00836	0.675637	-1.49246
Oral	X6_174007	BMI_CAT	BMI_CAToverweight	1	0.135788	379	0.645352	0.163588	1.38997	0.446579	0.299384	1.49166
Airways	X6_81136	BMI_CAT	BMI_CATobese	1	0.13625	92	0.309787	0.0543478	1.44118	1.97408	1.32497	1.4899
Gastrointestinal tract	X6_17925	BMI_CAT	BMI_CATobese	1	0.137754	111	0.961888	0.630631	1.43492	1.0371	0.698755	1.48421
Gastrointestinal tract	X6_148554	DSUBFED	DSUBFED	1	0.138262	108	0.481546	0.898148	1.18299	0.946084	0.638257	1.48229
Gastrointestinal tract	X6_208248	BMI_CAT	BMI_CAToverweight	1	0.138732	111	0.825497	0.252252	1.43492	-0.839456	0.566997	-1.48053
Oral	X6_24671	OCPTN_ST	OCPTN_STTRUE	1	0.139484	77	0.911497	0.311688	1	-0.771399	0.522021	-1.47772
Oral	X6_72946	DCMCODE_13	DCMCODE_13TRUE	1	0.13957	80	0.978656	0.6125	0.621261	-0.942876	0.638201	-1.47739
Gastrointestinal tract	X7_147498	BMI_CAT	BMI_CATobese	1	0.140571	111	0.745871	0.207207	1.43492	-1.58844	1.07788	-1.47367
Gastrointestinal tract	X6_139761	MURICA	MURICATRUE	1	0.140797	111	0.689564	0.18018	0.500955	-0.996002	0.676251	-1.47283
Gastrointestinal tract	X6_90929	BMI_CAT	BMI_CATobese	1	0.140998	111	0.795655	0.234234	1.43492	-1.58956	1.0798	-1.47208
Gastrointestinal tract	X6_72839	BMI_CAT	BMI_CATobese	1	0.14105	111	0.996554	0.567568	1.43492	0.942451	0.640299	1.47189
Gastrointestinal tract	X6_91527	BMI_CAT	BMI_CAToverweight	1	0.141471	111	0.669225	0.171171	1.43492	0.820801	0.558241	1.47034
Oral	X6_99002	MURICA	MURICATRUE	1	0.142332	379	0.736241	0.205805	0.512293	-0.545719	0.371956	-1.46716
Oral	X6_154791	DCMCODE_13	DCMCODE_13TRUE	1	0.14243	80	1	0.45	0.621261	-1.04083	0.709594	-1.4668
Oral	X6_128085	EDLVL_BS	EDLVL_BSTRUE	1	0.142488	44	1	0.5	0.903424	-1.19212	0.812853	-1.46659
Gastrointestinal tract	X6_183699	OCPTN_ST	OCPTN_STTRUE	1	0.142503	46	0.735986	0.195652	1	1.18958	0.811154	1.46653
Gastrointestinal tract	X6_137666	BMI_CAT	BMI_CATobese	1	0.142683	111	0.500955	0.891892	1.43492	-1.2247	0.835478	-1.46587
Airways	X6_181184	OCPTN_ST	OCPTN_STTRUE	1	0.142747	19	0.958712	0.315789	1	-1.82874	1.24774	-1.46564
Oral	X6_64207	BMI_CAT	BMI_CAToverweight	1	0.144114	379	0.843442	0.730871	1.38997	-0.36545	0.250198	-1.46064
Oral	X6_199448	BMI_CAT	BMI_CAToverweight	1	0.144221	379	0.920898	0.667546	1.38997	-0.34506	0.236302	-1.46025
Oral	X6_156982	MURICA	MURICATRUE	1	0.144359	379	0.751442	0.78628	0.512293	-0.676748	0.463606	-1.45975
Gastrointestinal tract	X6_88033	BMI_CAT	BMI_CAToverweight	1	0.144548	111	0.689564	0.18018	1.43492	-0.899038	0.616175	-1.45906
Oral	X6_173132	EDLVL_BS	EDLVL_BSTRUE	1	0.14576	44	0.371879	0.0681818	0.903424	-2.02025	1.3888	-1.45467
Oral	X6_154692	DSUDIET	DSUDIET	1	0.145878	365	0.735714	0.794521	0.222786	-0.430814	0.296245	-1.45425
Gastrointestinal tract	X6_194344	OCPTN_ST	OCPTN_STTRUE	1	0.146955	46	0.913278	0.304348	1	-1.04246	0.718756	-1.45037
Gastrointestinal tract	X6_95788	OCPTN_ST	OCPTN_STTRUE	1	0.146955	46	0.913278	0.695652	1	1.04246	0.718756	1.45037
Gastrointestinal tract	X6_88033	DSUBFED	DSUBFED	1	0.147497	108	0.700769	0.185185	1.18299	-0.718095	0.495775	-1.44843
Airways	X6_104327	OCPTN_ST	OCPTN_STTRUE	1	0.148016	19	0.799049	0.210526	1	1.94591	1.34519	1.44657
Gastrointestinal tract	X6_189038	BMI_CAT	BMI_CATobese	1	0.148083	111	1	0.459459	1.43492	0.851822	0.588952	1.44634
Urogenital tract	X6_173132	BMI_CAT	BMI_CAToverweight	1	0.148891	64	0.712301	0.1875	1.45931	1.11563	0.772886	1.44346
Gastrointestinal tract	X6_142856	DSUBFED	DSUBFED	1	0.149612	108	1	0.527778	1.18299	0.541948	0.376116	1.4409
Urogenital tract	X6_160917	BMI_CAT	BMI_CAToverweight	1	0.15065	64	0.973668	0.375	1.45931	0.887546	0.617535	1.43724
Oral	X6_93518	DSUBFED	DSUBFED	1	0.1514	365	0.684643	0.180822	1.31047	0.32926	0.229513	1.4346
Gastrointestinal tract	X6_86151	OCPTN_ST	OCPTN_STTRUE	1	0.15168	46	0.577004	0.869565	1	1.67356	1.16737	1.43362
Gastrointestinal tract	X6_33238	BMI_CAT	BMI_CAToverweight	1	0.151714	111	0.625998	0.153153	1.43492	0.842432	0.587674	1.4335
Oral	X6_213963	MURICA	MURICATRUE	1	0.151792	379	0.692943	0.184697	0.512293	0.782562	0.546012	1.43323
Oral	X6_56043	BMI_CAT	BMI_CAToverweight	1	0.152796	379	0.65155	0.833773	1.38997	-0.423731	0.296372	-1.42972
Gastrointestinal tract	X6_202734	MURICA	MURICATRUE	1	0.154217	111	0.961888	0.630631	0.500955	-1.14647	0.804657	-1.42479
Oral	X6_184627	DSUDIET	DSUDIET	1	0.154387	365	0.813436	0.750685	0.222786	-0.411158	0.288693	-1.4242
Airways	X6_61081	BMI_CAT	BMI_CATobese	1	0.154665	92	0.394769	0.076087	1.44118	1.52302	1.0701	1.42325
Oral	X6_85545	EDLVL_BS	EDLVL_BSTRUE	1	0.154995	44	0.930381	0.318182	0.903424	-1.08326	0.761728	-1.42211
Airways	X6_181184	DSUBFED	DSUBFED	1	0.155128	88	0.805888	0.238636	1.36952	-0.650539	0.457594	-1.42165
Airways	X6_30143	MURICA	MURICATRUE	1	0.155704	92	1	0.478261	0.504173	-1.05373	0.742236	-1.41967
Urogenital tract	X6_99092	DSUBFED	DSUBFED	1	0.155873	64	0.34554	0.0625	1.19836	1.32176	0.931411	1.41909
Oral	X6_105225	DCMCODE_13	DCMCODE_13TRUE	1	0.156112	80	1	0.525	0.621261	-0.938026	0.661387	-1.41827
Oral	X6_66152	DSUDIET	DSUDIET	1	0.156433	365	0.908553	0.679452	0.222786	-0.406871	0.287101	-1.41717
Oral	X6_60213	BMI_CAT	BMI_CAToverweight	1	0.156583	379	0.61324	0.150396	1.38997	-0.467432	0.329954	-1.41666
Airways	X6_65508	BMI_CAT	BMI_CAToverweight	1	0.15693	92	0.433354	0.0869565	1.44118	-1.58597	1.12046	-1.41547
Gastrointestinal tract	X6_75619	MURICA	MURICATRUE	1	0.157229	111	0.554155	0.126126	0.500955	-1.06357	0.751931	-1.41445
Oral	X6_91953	DCMCODE_13	DCMCODE_13TRUE	1	0.157632	80	0.845479	0.2625	0.621261	-1.52318	1.07791	-1.41308
Gastrointestinal tract	X6_119084	MURICA	MURICATRUE	1	0.157875	111	0.825497	0.252252	0.500955	-0.899957	0.637249	-1.41225
Gastrointestinal tract	X6_184881	BMI_CAT	BMI_CAToverweight	1	0.158208	111	0.839464	0.261261	1.43492	0.693125	0.491186	1.41112
Oral	X6_173132	BMI_CAT	BMI_CATobese	1	0.158898	379	0.715106	0.195251	1.38997	0.551299	0.391329	1.40879
Oral	X6_145806	BMI_CAT	BMI_CAToverweight	1	0.159455	379	0.741369	0.791557	1.38997	-0.384958	0.27362	-1.40691
Gastrointestinal tract	X6_107271	BMI_CAT	BMI_CAToverweight	1	0.160178	111	0.810899	0.756757	1.43492	-0.679421	0.483755	-1.40447
Gastrointestinal tract	X6_85774	BMI_CAT	BMI_CAToverweight	1	0.160318	111	0.865561	0.720721	1.43492	0.680144	0.484432	1.404
Oral	X6_144765	DSUDIET	DSUDIET	1	0.160379	365	0.994384	0.443836	0.222786	-0.471239	0.335688	-1.4038
Oral	X6_113993	BMI_CAT	BMI_CATobese	1	0.160719	379	0.994903	0.44591	1.38997	0.482487	0.343981	1.40266
Oral	X6_213360	OCPTN_ST	OCPTN_STTRUE	1	0.161324	77	0.925897	0.324675	1	-0.721581	0.515182	-1.40063
Oral	X7_81985	EDLVL_BS	EDLVL_BSTRUE	1	0.161354	44	0.903424	0.295455	0.903424	-1.0904	0.778562	-1.40053
Oral	X6_26906	BMI_CAT	BMI_CAToverweight	1	0.162011	379	0.780238	0.770449	1.38997	-0.371836	0.265913	-1.39834
Oral	X6_174007	DSUBFED	DSUBFED	1	0.162566	365	0.647325	0.164384	1.31047	0.358891	0.256994	1.39649
Airways	X6_44338	DSUBFED	DSUBFED	1	0.162613	88	0.159384	0.0227273	1.36952	2.07412	1.4854	1.39634
Airways	X6_92037	DSUBFED	DSUBFED	1	0.162613	88	0.159384	0.0227273	1.36952	2.07412	1.4854	1.39634
Gastrointestinal tract	X6_76246	BMI_CAT	BMI_CATobese	1	0.163071	111	0.442807	0.90991	1.43492	-1.45953	1.04639	-1.39482
Oral	X6_205407	DSUDIET	DSUDIET	1	0.163333	365	0.960395	0.378082	0.222786	-0.544788	0.390823	-1.39395
Gastrointestinal tract	X6_76152	BMI_CAT	BMI_CAToverweight	1	0.163441	111	0.500955	0.891892	1.43492	-0.96793	0.694557	-1.39359
Gastrointestinal tract	X6_84398	MURICA	MURICATRUE	1	0.163722	111	0.996554	0.432432	0.500955	0.979734	0.703497	1.39266
Oral	X6_142117	MURICA	MURICATRUE	1	0.164145	379	0.936055	0.348285	0.512293	0.534424	0.384128	1.39127
Gastrointestinal tract	X6_149008	MURICA	MURICATRUE	1	0.164578	111	1	0.459459	0.500955	-0.91535	0.658602	-1.38984
Oral	X6_184360	DCMCODE_13	DCMCODE_13TRUE	1	0.165684	80	0.999538	0.4375	0.621261	-0.990287	0.714386	-1.38621
Airways	X6_83290	DSUBFED	DSUBFED	1	0.16579	88	0.407607	0.0795455	1.36952	1.05278	0.759661	1.38586
Oral	X6_196036	BMI_CAT	BMI_CAToverweight	1	0.165849	379	0.968716	0.609499	1.38997	-0.314518	0.22698	-1.38566
Gastrointestinal tract	X6_148529	BMI_CAT	BMI_CATobese	1	0.165975	111	0.810899	0.243243	1.43492	0.859365	0.620367	1.38525
Gastrointestinal tract	X6_203385	OCPTN_ST	OCPTN_STTRUE	1	0.166088	46	0.688113	0.826087	1	1.26712	0.914963	1.38488
Gastrointestinal tract	X6_140225	OCPTN_ST	OCPTN_STTRUE	1	0.166319	46	0.577004	0.869565	1	-1.3649	0.986108	-1.38413
Gastrointestinal tract	X6_60151	OCPTN_ST	OCPTN_STTRUE	1	0.166319	46	0.577004	0.130435	1	1.3649	0.986108	1.38413
Gastrointestinal tract	X6_213905	MURICA	MURICATRUE	1	0.166333	111	0.709098	0.189189	0.500955	-0.93444	0.675133	-1.38408
Oral	X6_58175	DSUBFED	DSUBFED	1	0.16702	365	0.563871	0.131507	1.31047	-0.372662	0.269685	-1.38184
Oral	X6_139150	OCPTN_ST	OCPTN_STTRUE	1	0.168547	77	0.971915	0.623377	1	-0.683645	0.496515	-1.37689
Oral	X6_208903	DCMCODE_13	DCMCODE_13TRUE	1	0.168946	80	0.925647	0.675	0.621261	-0.874987	0.636078	-1.3756
Gastrointestinal tract	X6_109965	MURICA	MURICATRUE	1	0.169352	111	0.810899	0.243243	0.500955	-0.878234	0.639046	-1.37429
Gastrointestinal tract	X6_118674	BMI_CAT	BMI_CAToverweight	1	0.170121	111	0.839464	0.738739	1.43492	0.702927	0.512406	1.37182
Oral	X6_122071	BMI_CAT	BMI_CATobese	1	0.170444	379	0.770873	0.224274	1.38997	-0.613762	0.447748	-1.37078
Oral	X6_104618	MURICA	MURICATRUE	1	0.170547	379	1	0.522427	0.512293	0.451386	0.329371	1.37045
Gastrointestinal tract	X6_77230	BMI_CAT	BMI_CATobese	1	0.170946	111	0.554155	0.873874	1.43492	-0.979272	0.71523	-1.36917
Gastrointestinal tract	X6_105916	BMI_CAT	BMI_CATobese	1	0.171516	111	1	0.495495	1.43492	-0.830971	0.607724	-1.36735
Gastrointestinal tract	X6_127818	DSUBFED	DSUBFED	1	0.171584	108	0.997509	0.435185	1.18299	-0.519596	0.380063	-1.36713
Urogenital tract	X6_208036	MURICA	MURICATRUE	1	0.172617	64	0.279733	0.046875	0.405114	-1.94591	1.42678	-1.36384
Oral	X6_116723	BMI_CAT	BMI_CATobese	1	0.174329	379	0.97039	0.39314	1.38997	0.463304	0.341059	1.35843
Oral	X6_37895	DSUDIET	DSUDIET	1	0.174342	365	1	0.520548	0.222786	0.41818	0.307851	1.35838
Oral	X6_91953	BMI_CAT	BMI_CATobese	1	0.174513	379	0.626314	0.155673	1.38997	-0.759709	0.559497	-1.35784
Gastrointestinal tract	X6_116015	BMI_CAT	BMI_CAToverweight	1	0.174606	111	0.411615	0.0810811	1.43492	1.04365	0.768771	1.35755
Gastrointestinal tract	X6_145397	DSUBFED	DSUBFED	1	0.174635	108	0.990908	0.583333	1.18299	-0.512454	0.37751	-1.35746
Oral	X6_144884	MURICA	MURICATRUE	1	0.174886	379	0.839601	0.733509	0.512293	0.467891	0.344882	1.35667
Gastrointestinal tract	X6_210288	OCPTN_ST	OCPTN_STTRUE	1	0.175652	46	0.77935	0.217391	1	-1.10166	0.813471	-1.35427
Oral	X6_155466	DCMCODE_13	DCMCODE_13TRUE	1	0.176123	80	0.805252	0.2375	0.621261	-1.50249	1.11066	-1.35279
Gastrointestinal tract	X6_39471	MURICA	MURICATRUE	1	0.176219	111	0.745871	0.792793	0.500955	0.96053	0.710194	1.35249
Oral	X6_70847	EDLVL_BS	EDLVL_BSTRUE	1	0.176506	44	0.83777	0.25	0.903424	1.56772	1.15991	1.35159
Gastrointestinal tract	X7_129304	MURICA	MURICATRUE	1	0.177156	111	0.825497	0.252252	0.500955	-0.85486	0.633435	-1.34956
Gastrointestinal tract	X6_107271	OCPTN_ST	OCPTN_STTRUE	1	0.177349	46	0.735986	0.804348	1	1.1987	0.888605	1.34896
Oral	X6_39457	OCPTN_ST	OCPTN_STTRUE	1	0.177492	77	0.987808	0.597403	1	-0.673087	0.499131	-1.34852
Gastrointestinal tract	X6_127818	BMI_CAT	BMI_CAToverweight	1	0.177894	111	0.993454	0.423423	1.43492	0.57425	0.426233	1.34727
Gastrointestinal tract	X6_161782	DSUBFED	DSUBFED	1	0.178147	108	0.658986	0.166667	1.18299	-0.675518	0.501691	-1.34648
Gastrointestinal tract	X6_148529	MURICA	MURICATRUE	1	0.180048	111	0.810899	0.243243	0.500955	1.44151	1.07527	1.34061
Oral	X7_21650	DSUBFED	DSUBFED	1	0.180925	365	0.730315	0.20274	1.31047	0.288891	0.215927	1.33791
Gastrointestinal tract	X6_84398	BMI_CAT	BMI_CAToverweight	1	0.181546	111	0.996554	0.432432	1.43492	0.570738	0.427197	1.33601
Gastrointestinal tract	X6_205736	BMI_CAT	BMI_CAToverweight	1	0.181774	111	1	0.522523	1.43492	0.565659	0.423616	1.33531
Gastrointestinal tract	X6_141836	BMI_CAT	BMI_CAToverweight	1	0.183157	111	0.865561	0.279279	1.43492	0.605996	0.455261	1.3311
Gastrointestinal tract	X6_62357	BMI_CAT	BMI_CAToverweight	1	0.183577	111	0.76316	0.783784	1.43492	0.708986	0.533143	1.32982
Gastrointestinal tract	X6_202994	DSUBFED	DSUBFED	1	0.183616	108	0.8222	0.75	1.18299	0.572758	0.430742	1.3297
Airways	X6_104327	MURICA	MURICATRUE	1	0.18373	92	0.309787	0.0543478	0.504173	-1.95388	1.4698	-1.32936
Skin	X6_104120	DSUBFED	DSUBFED	1	0.183746	23	0.595609	0.130435	1.55818	1.94591	1.46385	1.32931
Skin	X6_107496	DSUBFED	DSUBFED	1	0.183746	23	0.595609	0.130435	1.55818	1.94591	1.46385	1.32931
Skin	X6_125450	DSUBFED	DSUBFED	1	0.183746	23	0.595609	0.130435	1.55818	1.94591	1.46385	1.32931
Skin	X6_173132	DSUBFED	DSUBFED	1	0.183746	23	0.595609	0.130435	1.55818	1.94591	1.46385	1.32931
Skin	X6_37664	DSUBFED	DSUBFED	1	0.183746	23	0.595609	0.130435	1.55818	1.94591	1.46385	1.32931
Skin	X6_44338	DSUBFED	DSUBFED	1	0.183746	23	0.595609	0.130435	1.55818	1.94591	1.46385	1.32931
Skin	X6_71275	DSUBFED	DSUBFED	1	0.183746	23	0.595609	0.130435	1.55818	1.94591	1.46385	1.32931
Oral	X6_58645	EDLVL_BS	EDLVL_BSTRUE	1	0.183849	44	0.798759	0.772727	0.903424	1.34993	1.01575	1.329
Airways	X6_92939	BMI_CAT	BMI_CAToverweight	1	0.183859	92	0.262466	0.0434783	1.44118	1.58623	1.19358	1.32897
Oral	X6_144816	DSUDIET	DSUDIET	1	0.184573	365	0.634263	0.158904	0.222786	0.415828	0.313405	1.3268
Oral	X6_85714	BMI_CAT	BMI_CATobese	1	0.184652	379	0.996383	0.451187	1.38997	-0.462932	0.34897	-1.32657
Oral	X6_60213	DSUBFED	DSUBFED	1	0.184666	365	0.600163	0.145205	1.31047	0.327971	0.247241	1.32653
Oral	X6_153831	OCPTN_ST	OCPTN_STTRUE	1	0.184996	77	0.667687	0.168831	1	-0.859982	0.648785	-1.32553
Gastrointestinal tract	X6_213905	DSUBFED	DSUBFED	1	0.185054	108	0.720396	0.194444	1.18299	0.626612	0.472789	1.32535
Gastrointestinal tract	X6_147771	DSUBFED	DSUBFED	1	0.185054	108	0.720396	0.194444	1.18299	0.626612	0.472789	1.32535
Oral	X6_202842	OCPTN_ST	OCPTN_STTRUE	1	0.185544	77	0.53059	0.883117	1	-1.06346	0.803294	-1.32388
Oral	X6_24671	BMI_CAT	BMI_CAToverweight	1	0.185679	379	0.933641	0.345646	1.38997	-0.314534	0.237659	-1.32347
Gastrointestinal tract	X6_208248	MURICA	MURICATRUE	1	0.186133	111	0.825497	0.252252	0.500955	-0.838217	0.634001	-1.32211
Gastrointestinal tract	X6_153601	BMI_CAT	BMI_CATobese	1	0.186143	111	0.889288	0.297297	1.43492	-1.07496	0.813084	-1.32208
Gastrointestinal tract	X6_49036	DCMCODE_13	DCMCODE_13TRUE	1	0.186435	46	0.266976	0.956522	0.688113	-2.03688	1.54169	-1.3212
Urogenital tract	X6_173132	BMI_CAT	BMI_CATobese	1	0.186548	64	0.712301	0.1875	1.45931	1.42816	1.08123	1.32086
Gastrointestinal tract	X6_195565	DSUBFED	DSUBFED	1	0.186878	108	0.807018	0.759259	1.18299	0.597664	0.45282	1.31987
Oral	X6_25913	DSUDIET	DSUDIET	1	0.186953	365	0.702298	0.810959	0.222786	-0.393442	0.298142	-1.31965
Gastrointestinal tract	X6_70847	BMI_CAT	BMI_CAToverweight	1	0.1877	111	0.709098	0.189189	1.43492	-0.75483	0.572963	-1.31741
Oral	X6_44338	DSUBFED	DSUBFED	1	0.189323	365	0.876225	0.706849	1.31047	-0.252442	0.192325	-1.31258
Oral	X6_212883	DCMCODE_13	DCMCODE_13TRUE	1	0.189689	80	0.938383	0.3375	0.621261	-1.07178	0.817215	-1.3115
Gastrointestinal tract	X6_107860	DCMCODE_13	DCMCODE_13TRUE	1	0.189921	46	0.958712	0.347826	0.688113	-1.47297	1.1237	-1.31081
Airways	X6_30143	BMI_CAT	BMI_CATobese	1	0.190172	92	1	0.478261	1.44118	-0.894984	0.683158	-1.31007
Gastrointestinal tract	X6_128085	OCPTN_ST	OCPTN_STTRUE	1	0.190276	46	0.989588	0.391304	1	-0.866688	0.661714	-1.30976
Oral	X6_210706	OCPTN_ST	OCPTN_STTRUE	1	0.19054	77	0.636396	0.844156	1	-0.908982	0.694418	-1.30898
Gastrointestinal tract	X6_95094	DSUBFED	DSUBFED	1	0.190658	108	0.386407	0.925926	1.18299	0.989899	0.756436	1.30864
Urogenital tract	X6_56043	MURICA	MURICATRUE	1	0.190831	64	0.34554	0.0625	0.405114	-1.72931	1.32198	-1.30812
Urogenital tract	X6_67816	MURICA	MURICATRUE	1	0.190831	64	0.34554	0.0625	0.405114	-1.72931	1.32198	-1.30812
Airways	X6_30143	DSUBFED	DSUBFED	1	0.191087	88	1	0.454545	1.36952	0.469758	0.359315	1.30737
Gastrointestinal tract	X6_211540	BMI_CAT	BMI_CATobese	1	0.191098	111	0.999951	0.45045	1.43492	0.782626	0.598642	1.30734
Oral	X6_92251	MURICA	MURICATRUE	1	0.191129	379	0.572084	0.134565	0.512293	0.810839	0.620265	1.30725
Oral	X6_196633	DSUBFED	DSUBFED	1	0.191201	365	0.666327	0.827397	1.31047	-0.294358	0.225211	-1.30703
Oral	X6_135880	DSUBFED	DSUBFED	1	0.191508	365	0.620876	0.153425	1.31047	0.332706	0.254726	1.30613
Gastrointestinal tract	X6_56522	DSUBFED	DSUBFED	1	0.191526	108	0.386407	0.0740741	1.18299	0.860583	0.658906	1.30608
Airways	X6_161782	BMI_CAT	BMI_CAToverweight	1	0.192091	92	0.999944	0.445652	1.44118	-0.620871	0.475975	-1.30442
Gastrointestinal tract	X6_56043	MURICA	MURICATRUE	1	0.192595	111	0.825497	0.747748	0.500955	-1.39344	1.06946	-1.30294
Oral	X6_156982	BMI_CAT	BMI_CAToverweight	1	0.194901	379	0.751442	0.78628	1.38997	-0.34959	0.2697	-1.29622
Airways	X6_65508	DSUBFED	DSUBFED	1	0.196414	88	0.447164	0.0909091	1.36952	0.94304	0.730001	1.29183
Oral	X6_62357	EDLVL_BS	EDLVL_BSTRUE	1	0.197878	44	0.755304	0.204545	0.903424	-1.0998	0.854137	-1.28762
Oral	X6_117494	DSUDIET	DSUDIET	1	0.19788	365	0.786139	0.767123	0.222786	-0.380526	0.295528	-1.28762
Oral	X6_39457	EDLVL_BS	EDLVL_BSTRUE	1	0.198408	44	0.972736	0.636364	0.903424	1.02449	0.79659	1.2861
Oral	X6_108247	BMI_CAT	BMI_CAToverweight	1	0.198952	379	0.572084	0.134565	1.38997	0.40667	0.316587	1.28454
Oral	X6_120450	BMI_CAT	BMI_CATobese	1	0.199052	379	0.943031	0.356201	1.38997	0.444472	0.346093	1.28426
Skin	X6_181184	DSUBFED	DSUBFED	1	0.199067	23	0.999762	0.391304	1.55818	-1.45935	1.13638	-1.28421
Oral	X6_117494	EDLVL_BS	EDLVL_BSTRUE	1	0.199284	44	0.65361	0.840909	0.903424	-1.60021	1.24667	-1.28359
Gastrointestinal tract	X6_97505	BMI_CAT	BMI_CAToverweight	1	0.200017	111	0.974651	0.612613	1.43492	-0.55318	0.431664	-1.2815
Urogenital tract	X6_30726	BMI_CAT	BMI_CAToverweight	1	0.2002	64	0.509889	0.109375	1.45931	1.22948	0.959794	1.28098
Oral	X6_177609	BMI_CAT	BMI_CATobese	1	0.201297	379	0.973611	0.398417	1.38997	0.436941	0.34193	1.27787
Oral	X6_179701	MURICA	MURICATRUE	1	0.20141	379	0.928679	0.340369	0.512293	0.471855	0.369345	1.27754
Gastrointestinal tract	X6_107271	MURICA	MURICATRUE	1	0.201752	111	0.810899	0.756757	0.500955	-1.36543	1.06961	-1.27658
Oral	X6_128085	DCMCODE_13	DCMCODE_13TRUE	1	0.202661	80	1	0.5	0.621261	-0.862484	0.676985	-1.27401
Airways	X6_39457	BMI_CAT	BMI_CATobese	1	0.204087	92	0.353708	0.0652174	1.44118	1.36387	1.07392	1.26999
Gastrointestinal tract	X6_141836	DCMCODE_13	DCMCODE_13TRUE	1	0.2045	46	0.937734	0.326087	0.688113	-1.42804	1.12547	-1.26883
Oral	X6_144884	BMI_CAT	BMI_CAToverweight	1	0.204939	379	0.839601	0.733509	1.38997	-0.316474	0.249663	-1.2676
Oral	X6_173979	BMI_CAT	BMI_CAToverweight	1	0.205297	379	0.97039	0.39314	1.38997	-0.291992	0.230532	-1.2666
Airways	X6_103923	BMI_CAT	BMI_CAToverweight	1	0.205639	92	0.469748	0.0978261	1.44118	0.978649	0.77324	1.26565
Oral	X6_144765	EDLVL_BS	EDLVL_BSTRUE	1	0.206408	44	1	0.545455	0.903424	-0.97907	0.774884	-1.2635
Gastrointestinal tract	X6_158611	DCMCODE_13	DCMCODE_13TRUE	1	0.206715	46	0.913278	0.695652	0.688113	-1.01207	0.801548	-1.26265
Oral	X6_144884	DCMCODE_13	DCMCODE_13TRUE	1	0.207792	80	0.78325	0.775	0.621261	1.39188	1.10496	1.25966
Oral	X6_173132	OCPTN_ST	OCPTN_STTRUE	1	0.207928	77	0.53059	0.116883	1	-0.970401	0.770598	-1.25928
Gastrointestinal tract	X7_66598	BMI_CAT	BMI_CATobese	1	0.209218	111	0.810899	0.756757	1.43492	1.03228	0.82206	1.25572
Gastrointestinal tract	X6_130646	OCPTN_ST	OCPTN_STTRUE	1	0.209931	46	0.577004	0.130435	1	-1.45743	1.16245	-1.25376
Gastrointestinal tract	X7_147498	OCPTN_ST	OCPTN_STTRUE	1	0.209931	46	0.577004	0.130435	1	-1.45743	1.16245	-1.25376
Gastrointestinal tract	X6_90929	DSUBFED	DSUBFED	1	0.21039	108	0.807018	0.240741	1.18299	0.532289	0.424984	1.25249
Gastrointestinal tract	X6_184628	MURICA	MURICATRUE	1	0.210652	111	1	0.504505	0.500955	-0.816007	0.651881	-1.25177
Gastrointestinal tract	X6_98694	DCMCODE_13	DCMCODE_13TRUE	1	0.211188	46	0.913278	0.304348	0.688113	-1.42743	1.14166	-1.2503
Oral	X6_149008	DSUDIET	DSUDIET	1	0.211249	365	0.928195	0.339726	0.222786	-0.488408	0.390683	-1.25014
Airways	X6_36135	DSUBFED	DSUBFED	1	0.211316	88	0.484419	0.102273	1.36952	0.815305	0.652268	1.24995
Airways	X6_96390	DSUBFED	DSUBFED	1	0.21262	88	0.365449	0.0681818	1.36952	-1.0475	0.840429	-1.24639
Gastrointestinal tract	X7_132061	BMI_CAT	BMI_CAToverweight	1	0.212903	111	0.999951	0.54955	1.43492	-0.524975	0.421456	-1.24562
Gastrointestinal tract	X6_127818	DCMCODE_13	DCMCODE_13TRUE	1	0.21312	46	1	0.456522	0.688113	-1.09861	0.882397	-1.24503
Gastrointestinal tract	X7_66598	OCPTN_ST	OCPTN_STTRUE	1	0.21353	46	0.635305	0.847826	1	1.16686	0.938057	1.24392
Skin	X6_117494	DSUBFED	DSUBFED	1	0.21408	23	0.802859	0.217391	1.55818	1.06594	0.857953	1.24242
Skin	X6_61956	DSUBFED	DSUBFED	1	0.21408	23	0.802859	0.217391	1.55818	1.06594	0.857953	1.24242
Skin	X6_96390	DSUBFED	DSUBFED	1	0.21408	23	0.802859	0.217391	1.55818	1.06594	0.857953	1.24242
Gastrointestinal tract	X6_92939	DSUBFED	DSUBFED	1	0.2141	108	0.636757	0.157407	1.18299	-0.663652	0.534183	-1.24237
Gastrointestinal tract	X6_115024	DSUBFED	DSUBFED	1	0.214577	108	0.636757	0.157407	1.18299	-0.625166	0.503728	-1.24108
Oral	X6_179701	DSUBFED	DSUBFED	1	0.215959	365	0.911508	0.323288	1.31047	-0.235101	0.190004	-1.23734
Gastrointestinal tract	X6_128368	DSUBFED	DSUBFED	1	0.216331	108	0.658986	0.833333	1.18299	0.649222	0.525114	1.23634
Skin	X6_103923	OCPTN_ST	OCPTN_STTRUE	1	0.216342	13	1	0.384615	1	1.67398	1.35401	1.23631
Gastrointestinal tract	X6_60553	DSUBFED	DSUBFED	1	0.21657	108	0.888339	0.703704	1.18299	0.526134	0.425778	1.2357
Oral	X6_63870	EDLVL_BS	EDLVL_BSTRUE	1	0.216632	44	1	0.5	0.903424	-0.935584	0.757231	-1.23553
Gastrointestinal tract	X6_65847	MURICA	MURICATRUE	1	0.216843	111	0.993454	0.423423	0.500955	-0.772924	0.625866	-1.23497
Oral	X6_209274	BMI_CAT	BMI_CATobese	1	0.217078	379	0.888826	0.30343	1.38997	-0.485104	0.393009	-1.23433
Oral	X6_111258	DSUDIET	DSUDIET	1	0.217393	365	0.922829	0.665753	0.222786	-0.354435	0.287343	-1.23349
Airways	X6_110798	MURICA	MURICATRUE	1	0.217409	92	0.998364	0.434783	0.504173	-0.869352	0.704815	-1.23345
Gastrointestinal tract	X6_63487	DSUBFED	DSUBFED	1	0.218004	108	0.680311	0.175926	1.18299	-0.636821	0.516961	-1.23185
Oral	X6_61889	BMI_CAT	BMI_CATobese	1	0.218586	379	0.901142	0.686016	1.38997	0.523	0.4251	1.2303
Oral	X6_26759	OCPTN_ST	OCPTN_STTRUE	1	0.218817	77	1	0.467532	1	-0.589222	0.479166	-1.22968
Oral	X6_174007	DCMCODE_13	DCMCODE_13TRUE	1	0.219074	80	0.735226	0.2	0.621261	0.848279	0.690223	1.22899
Gastrointestinal tract	X6_174427	DSUBFED	DSUBFED	1	0.219163	108	0.700769	0.185185	1.18299	-0.626196	0.509618	-1.22876
Gastrointestinal tract	X6_119084	BMI_CAT	BMI_CATobese	1	0.219253	111	0.825497	0.252252	1.43492	-0.999952	0.81395	-1.22852
Oral	X6_125450	DCMCODE_13	DCMCODE_13TRUE	1	0.21963	80	0.735226	0.8	0.621261	-0.855396	0.696853	-1.22751
Oral	X6_202842	DSUBFED	DSUBFED	1	0.219756	365	0.735714	0.794521	1.31047	-0.261377	0.21299	-1.22718
Oral	X6_179701	EDLVL_BS	EDLVL_BSTRUE	1	0.220324	44	0.987731	0.386364	0.903424	1.02389	0.835376	1.22567
Oral	X6_190669	DCMCODE_13	DCMCODE_13TRUE	1	0.220358	80	0.735226	0.8	0.621261	-0.847298	0.691347	-1.22558
Oral	X6_158611	DSUBFED	DSUBFED	1	0.221185	365	0.593086	0.142466	1.31047	0.310844	0.254085	1.22338
Urogenital tract	X6_177585	BMI_CAT	BMI_CATobese	1	0.221394	64	0.279733	0.046875	1.45931	2.07005	1.69283	1.22283
Gastrointestinal tract	X6_157953	DCMCODE_13	DCMCODE_13TRUE	1	0.221621	46	0.937734	0.673913	0.688113	1.37372	1.12394	1.22223
Oral	X6_92251	EDLVL_BS	EDLVL_BSTRUE	1	0.222169	44	0.59435	0.136364	0.903424	-1.22187	1.00089	-1.22078
Gastrointestinal tract	X6_135930	MURICA	MURICATRUE	1	0.222511	111	0.411615	0.918919	0.500955	1.08177	0.886784	1.21988
Oral	X6_108247	DCMCODE_13	DCMCODE_13TRUE	1	0.222568	80	0.78325	0.225	0.621261	-1.3266	1.08762	-1.21973
Gastrointestinal tract	X6_183641	DSUBFED	DSUBFED	1	0.223312	108	0.836711	0.259259	1.18299	0.529339	0.43468	1.21777
Oral	X6_85044	BMI_CAT	BMI_CAToverweight	1	0.223818	379	0.982252	0.414248	1.38997	-0.276669	0.227442	-1.21644
Gastrointestinal tract	X6_59371	BMI_CAT	BMI_CATobese	1	0.223844	111	0.877715	0.288288	1.43492	0.742316	0.610272	1.21637
Gastrointestinal tract	X6_84398	BMI_CAT	BMI_CATobese	1	0.224397	111	0.996554	0.432432	1.43492	0.716351	0.589628	1.21492
Gastrointestinal tract	X6_56347	DSUBFED	DSUBFED	1	0.224404	108	0.739221	0.796296	1.18299	0.564079	0.464301	1.2149
Oral	X6_113953	DSUBFED	DSUBFED	1	0.225258	365	0.781379	0.769863	1.31047	-0.247186	0.203837	-1.21266
Oral	X6_104618	OCPTN_ST	OCPTN_STTRUE	1	0.225507	77	0.999975	0.558442	1	0.587468	0.484704	1.21201
Oral	X6_194344	BMI_CAT	BMI_CATobese	1	0.226068	379	0.725799	0.799472	1.38997	0.617055	0.509732	1.21055
Oral	X6_37924	BMI_CAT	BMI_CATobese	1	0.226208	379	1	0.522427	1.38997	0.429854	0.355197	1.21019
Gastrointestinal tract	X6_27580	DCMCODE_13	DCMCODE_13TRUE	1	0.226581	46	1	0.434783	0.688113	-1.08016	0.893278	-1.20921
Oral	X6_70847	MURICA	MURICATRUE	1	0.226586	379	0.850972	0.274406	0.512293	-0.417259	0.34507	-1.2092
Gastrointestinal tract	X6_56043	BMI_CAT	BMI_CATobese	1	0.226808	111	0.825497	0.747748	1.43492	-0.739113	0.611534	-1.20862
Oral	X6_179701	OCPTN_ST	OCPTN_STTRUE	1	0.227742	77	0.987808	0.402597	1	0.593206	0.491799	1.2062
Gastrointestinal tract	X6_128368	BMI_CAT	BMI_CATobese	1	0.227981	111	0.669225	0.828829	1.43492	1.31069	1.08719	1.20558
Oral	X6_76803	MURICA	MURICATRUE	1	0.228295	379	0.815455	0.25066	0.512293	0.523835	0.434804	1.20476
Gastrointestinal tract	X6_76152	DSUBFED	DSUBFED	1	0.22848	108	0.510338	0.888889	1.18299	0.785565	0.65231	1.20428
Gastrointestinal tract	X6_90240	DCMCODE_13	DCMCODE_13TRUE	1	0.229072	46	0.937734	0.673913	0.688113	-0.970208	0.806656	-1.20275
Oral	X6_76803	DCMCODE_13	DCMCODE_13TRUE	1	0.229337	80	0.78325	0.225	0.621261	-1.29994	1.08142	-1.20207
Oral	X6_212883	MURICA	MURICATRUE	1	0.229395	379	0.8583	0.279683	0.512293	0.498117	0.414435	1.20192
Oral	X6_39457	BMI_CAT	BMI_CAToverweight	1	0.22949	379	0.997662	0.543536	1.38997	-0.270947	0.225475	-1.20167
Skin	X6_49947	DSUBFED	DSUBFED	1	0.229866	23	0.70964	0.173913	1.55818	1.22197	1.01771	1.2007
Skin	X6_81136	DSUBFED	DSUBFED	1	0.229866	23	0.70964	0.173913	1.55818	1.22197	1.01771	1.2007
Gastrointestinal tract	X6_149008	DSUBFED	DSUBFED	1	0.229981	108	0.999433	0.444444	1.18299	-0.454346	0.378493	-1.20041
Oral	X6_117494	BMI_CAT	BMI_CATobese	1	0.230214	379	0.784836	0.76781	1.38997	-0.463627	0.386418	-1.19981
Gastrointestinal tract	X6_33024	MURICA	MURICATRUE	1	0.230284	111	1	0.495495	0.500955	0.77606	0.646918	1.19963
Oral	X6_30161	BMI_CAT	BMI_CAToverweight	1	0.230685	379	0.973611	0.398417	1.38997	-0.274346	0.228889	-1.1986
Airways	X7_53884	DSUBFED	DSUBFED	1	0.230905	88	0.159384	0.0227273	1.36952	1.58346	1.32172	1.19803
Airways	X6_97267	DSUBFED	DSUBFED	1	0.230905	88	0.159384	0.0227273	1.36952	1.58346	1.32172	1.19803
Airways	X6_117494	DSUBFED	DSUBFED	1	0.230905	88	0.159384	0.0227273	1.36952	1.58346	1.32172	1.19803
Airways	X6_128749	DSUBFED	DSUBFED	1	0.230905	88	0.159384	0.0227273	1.36952	1.58346	1.32172	1.19803
Airways	X6_156982	DSUBFED	DSUBFED	1	0.230905	88	0.159384	0.0227273	1.36952	1.58346	1.32172	1.19803
Airways	X6_196036	DSUBFED	DSUBFED	1	0.230905	88	0.159384	0.0227273	1.36952	1.58346	1.32172	1.19803
Airways	X6_149327	DSUBFED	DSUBFED	1	0.230905	88	0.159384	0.0227273	1.36952	1.58346	1.32172	1.19803
Airways	X6_90097	DSUBFED	DSUBFED	1	0.230905	88	0.159384	0.0227273	1.36952	1.58346	1.32172	1.19803
Gastrointestinal tract	X6_157953	BMI_CAT	BMI_CATobese	1	0.230942	111	0.954704	0.63964	1.43492	-0.701276	0.585404	-1.19794
Gastrointestinal tract	X6_194344	DSUBFED	DSUBFED	1	0.231568	108	0.850567	0.268519	1.18299	0.516266	0.431541	1.19633
Airways	X6_39457	DCMCODE_13	DCMCODE_13TRUE	1	0.231616	19	0.678954	0.157895	0.8916	1.67398	1.3994	1.19621
Oral	X6_37895	BMI_CAT	BMI_CATobese	1	0.231698	379	1	0.511873	1.38997	0.416153	0.347955	1.196
Gastrointestinal tract	X6_128085	MURICA	MURICATRUE	1	0.232091	111	0.985228	0.405405	0.500955	0.838364	0.701565	1.19499
Gastrointestinal tract	X6_97505	OCPTN_ST	OCPTN_STTRUE	1	0.232543	46	0.989588	0.608696	1	-0.759177	0.635916	-1.19383
Airways	X6_75619	DSUBFED	DSUBFED	1	0.232587	88	0.218415	0.0340909	1.36952	-1.31777	1.10392	-1.19372
Oral	X6_184360	EDLVL_BS	EDLVL_BSTRUE	1	0.232784	44	1	0.477273	0.903424	-0.89604	0.750944	-1.19322
Gastrointestinal tract	X6_114478	OCPTN_ST	OCPTN_STTRUE	1	0.232967	46	0.688113	0.173913	1	-1.07933	0.904912	-1.19275
Oral	X6_58645	BMI_CAT	BMI_CATobese	1	0.233073	379	0.898134	0.688654	1.38997	-0.431114	0.361527	-1.19248
Oral	X6_153897	BMI_CAT	BMI_CATobese	1	0.233118	379	0.579152	0.862797	1.38997	-0.513397	0.43057	-1.19237
Gastrointestinal tract	X6_105476	BMI_CAT	BMI_CATobese	1	0.233677	111	1	0.486486	1.43492	0.713392	0.599015	1.19094
Oral	X6_177609	BMI_CAT	BMI_CAToverweight	1	0.233681	379	0.973611	0.398417	1.38997	-0.27616	0.231886	-1.19093
Gastrointestinal tract	X6_56715	DSUBFED	DSUBFED	1	0.236848	108	0.45138	0.0925926	1.18299	0.712766	0.602557	1.1829
Oral	X6_128749	EDLVL_BS	EDLVL_BSTRUE	1	0.237309	44	0.83777	0.75	0.903424	-1.13808	0.963052	-1.18174
Gastrointestinal tract	X6_95788	BMI_CAT	BMI_CAToverweight	1	0.237679	111	0.954704	0.63964	1.43492	0.547773	0.463897	1.18081
Oral	X6_184628	MURICA	MURICATRUE	1	0.237867	379	0.645352	0.163588	0.512293	0.645597	0.54696	1.18034
Oral	X6_196036	MURICA	MURICATRUE	1	0.238388	379	0.968716	0.609499	0.512293	0.387113	0.328333	1.17903
Gastrointestinal tract	X6_39471	BMI_CAT	BMI_CATobese	1	0.238539	111	0.745871	0.792793	1.43492	0.984525	0.835301	1.17865
Gastrointestinal tract	X6_181184	BMI_CAT	BMI_CATobese	1	0.238618	111	0.669225	0.171171	1.43492	0.821546	0.697142	1.17845
Oral	X6_109255	OCPTN_ST	OCPTN_STTRUE	1	0.23891	77	0.751314	0.207792	1	-0.702629	0.596603	-1.17772
Oral	X6_26486	BMI_CAT	BMI_CAToverweight	1	0.239114	379	0.975157	0.598945	1.38997	-0.269091	0.228585	-1.1772
Oral	X6_72946	DSUDIET	DSUDIET	1	0.239339	365	0.99058	0.567123	0.222786	-0.344343	0.292649	-1.17664
Airways	X6_62357	MURICA	MURICATRUE	1	0.239523	92	0.78728	0.228261	0.504173	-0.947113	0.805245	-1.17618
Oral	X6_145806	DSUDIET	DSUDIET	1	0.240552	365	0.746312	0.789041	0.222786	-0.348106	0.296612	-1.17361
Skin	X6_49238	BMI_CAT	BMI_CATobese	1	0.240947	26	1	0.461538	1.35031	-1.45358	1.23959	-1.17262
Airways	X6_199978	DSUBFED	DSUBFED	1	0.241456	88	0.159384	0.0227273	1.36952	1.35509	1.15686	1.17135
Airways	X6_99092	DSUBFED	DSUBFED	1	0.241456	88	0.159384	0.0227273	1.36952	1.35509	1.15686	1.17135
Airways	X6_84046	DSUBFED	DSUBFED	1	0.241456	88	0.159384	0.0227273	1.36952	1.35509	1.15686	1.17135
Oral	X6_135314	BMI_CAT	BMI_CAToverweight	1	0.242856	379	0.798289	0.240106	1.38997	-0.306836	0.262729	-1.16788
Gastrointestinal tract	X6_122057	DSUBFED	DSUBFED	1	0.244755	108	0.969718	0.37963	1.18299	-0.444402	0.382057	-1.16318
Gastrointestinal tract	X6_57750	BMI_CAT	BMI_CATobese	1	0.244903	111	1	0.540541	1.43492	0.68678	0.590616	1.16282
Urogenital tract	X6_161782	DSUBFED	DSUBFED	1	0.244993	64	0.556422	0.125	1.19836	-0.79016	0.67965	-1.1626
Oral	X6_61652	BMI_CAT	BMI_CATobese	1	0.245139	379	0.984793	0.419525	1.38997	-0.402963	0.346713	-1.16224
Gastrointestinal tract	X7_213859	BMI_CAT	BMI_CATobese	1	0.246527	111	0.974651	0.612613	1.43492	0.708496	0.611391	1.15883
Urogenital tract	X6_137666	DSUBFED	DSUBFED	1	0.246633	64	0.205676	0.03125	1.19836	-1.61449	1.39353	-1.15857
Urogenital tract	X7_214048	DSUBFED	DSUBFED	1	0.246633	64	0.205676	0.03125	1.19836	-1.61449	1.39353	-1.15857
Urogenital tract	X6_42014	DSUBFED	DSUBFED	1	0.246633	64	0.205676	0.03125	1.19836	-1.61449	1.39353	-1.15857
Gastrointestinal tract	X6_202734	OCPTN_ST	OCPTN_STTRUE	1	0.247408	46	0.97611	0.630435	1	0.774757	0.669818	1.15667
Gastrointestinal tract	X6_104327	BMI_CAT	BMI_CAToverweight	1	0.247734	111	0.745871	0.792793	1.43492	0.620304	0.536655	1.15587
Gastrointestinal tract	X6_184881	DCMCODE_13	DCMCODE_13TRUE	1	0.247816	46	0.913278	0.304348	0.688113	0.950873	0.82279	1.15567
Oral	X6_49238	MURICA	MURICATRUE	1	0.248146	379	0.720484	0.197889	0.512293	-0.470038	0.407007	-1.15487
Oral	X6_54148	DCMCODE_13	DCMCODE_13TRUE	1	0.248374	80	0.911836	0.3125	0.621261	-0.942876	0.816832	-1.15431
Gastrointestinal tract	X6_62025	OCPTN_ST	OCPTN_STTRUE	1	0.250252	46	0.577004	0.869565	1	-1.09861	0.955533	-1.14974
Oral	X6_205407	OCPTN_ST	OCPTN_STTRUE	1	0.25052	77	0.987808	0.402597	1	0.563978	0.490805	1.14909
Gastrointestinal tract	X6_122071	DSUBFED	DSUBFED	1	0.251047	108	0.910474	0.314815	1.18299	-0.475181	0.413989	-1.14781
Oral	X6_159261	BMI_CAT	BMI_CATobese	1	0.251291	379	0.751442	0.21372	1.38997	-0.519549	0.452877	-1.14722
Oral	X6_199448	EDLVL_BS	EDLVL_BSTRUE	1	0.251691	44	0.930381	0.681818	0.903424	0.940328	0.82035	1.14625
Oral	X6_99002	OCPTN_ST	OCPTN_STTRUE	1	0.252024	77	0.667687	0.168831	1	-0.739132	0.645278	-1.14545
Gastrointestinal tract	X6_84398	DSUBFED	DSUBFED	1	0.252821	108	0.994602	0.425926	1.18299	0.427964	0.37425	1.14352
Oral	X6_113993	MURICA	MURICATRUE	1	0.253346	379	0.994903	0.44591	0.512293	0.390004	0.341432	1.14226
Gastrointestinal tract	X7_147498	MURICA	MURICATRUE	1	0.253534	111	0.745871	0.207207	0.500955	-0.760249	0.665828	-1.14181
Gastrointestinal tract	X6_42437	DSUBFED	DSUBFED	1	0.254177	108	0.739221	0.796296	1.18299	-0.550729	0.482984	-1.14026
Oral	X6_17925	BMI_CAT	BMI_CATobese	1	0.254185	379	0.907018	0.319261	1.38997	0.394744	0.346193	1.14024
Gastrointestinal tract	X6_89989	BMI_CAT	BMI_CATobese	1	0.255256	111	1	0.486486	1.43492	-0.692145	0.608385	-1.13768
Gastrointestinal tract	X6_69531	DSUBFED	DSUBFED	1	0.255497	108	0.920655	0.324074	1.18299	0.447016	0.39312	1.1371
Oral	X6_24722	OCPTN_ST	OCPTN_STTRUE	1	0.255771	77	0.951215	0.649351	1	-0.572116	0.503427	-1.13644
Oral	X6_44338	BMI_CAT	BMI_CATobese	1	0.256013	379	0.882383	0.701847	1.38997	-0.409508	0.360525	-1.13587
Gastrointestinal tract	X6_157953	OCPTN_ST	OCPTN_STTRUE	1	0.256228	46	0.937734	0.673913	1	0.778642	0.685816	1.13535
Gastrointestinal tract	X7_125528	MURICA	MURICATRUE	1	0.256405	111	0.889288	0.297297	0.500955	0.926279	0.816156	1.13493
Airways	X6_30143	BMI_CAT	BMI_CAToverweight	1	0.256951	92	1	0.478261	1.44118	-0.519784	0.458514	-1.13363
Gastrointestinal tract	X6_121134	DSUBFED	DSUBFED	1	0.257141	108	0.990908	0.583333	1.18299	-0.427163	0.376962	-1.13317
Oral	X6_62357	DCMCODE_13	DCMCODE_13TRUE	1	0.259327	80	0.759926	0.2125	0.621261	-1.22189	1.08325	-1.12798
Oral	X7_102617	DSUBFED	DSUBFED	1	0.260102	365	0.993506	0.441096	1.31047	-0.201363	0.178807	-1.12615
Oral	X6_184360	BMI_CAT	BMI_CATobese	1	0.260367	379	0.928679	0.340369	1.38997	-0.416962	0.37046	-1.12553
Gastrointestinal tract	X6_86151	BMI_CAT	BMI_CAToverweight	1	0.260567	111	0.709098	0.810811	1.43492	0.650371	0.57808	1.12505
Oral	X6_17925	BMI_CAT	BMI_CAToverweight	1	0.261827	379	0.907018	0.319261	1.38997	-0.272899	0.243208	-1.12208
Oral	X6_54148	OCPTN_ST	OCPTN_STTRUE	1	0.261927	77	0.925897	0.324675	1	-0.573987	0.511644	-1.12185
Oral	X6_36135	DCMCODE_13	DCMCODE_13TRUE	1	0.262723	80	0.759926	0.2125	0.621261	0.784273	0.700258	1.11998
Gastrointestinal tract	X6_110310	BMI_CAT	BMI_CAToverweight	1	0.263593	111	0.999951	0.45045	1.43492	-0.480992	0.430249	-1.11794
Oral	X6_37924	DSUDIET	DSUDIET	1	0.263644	365	0.999723	0.531507	0.222786	-0.34717	0.310578	-1.11782
Oral	X6_56668	DSUBFED	DSUBFED	1	0.263948	365	0.989509	0.430137	1.31047	0.200419	0.179409	1.11711
Gastrointestinal tract	X6_62357	BMI_CAT	BMI_CATobese	1	0.265646	111	0.76316	0.783784	1.43492	0.906562	0.814415	1.11315
Airways	X6_213320	MURICA	MURICATRUE	1	0.265736	92	0.433354	0.0869565	0.504173	-1.60559	1.44266	-1.11294
Gastrointestinal tract	X6_127818	OCPTN_ST	OCPTN_STTRUE	1	0.265847	46	1	0.456522	1	0.696446	0.62592	1.11268
Gastrointestinal tract	X6_144436	BMI_CAT	BMI_CATobese	1	0.266125	111	0.865561	0.279279	1.43492	-0.91059	0.818853	-1.11203
Oral	X6_120450	BMI_CAT	BMI_CAToverweight	1	0.266714	379	0.943031	0.356201	1.38997	0.260045	0.234135	1.11066
Gastrointestinal tract	X6_116067	DSUBFED	DSUBFED	1	0.266856	108	0.791149	0.768519	1.18299	0.490507	0.441766	1.11033
Oral	X6_190669	BMI_CAT	BMI_CAToverweight	1	0.266884	379	0.687237	0.817942	1.38997	-0.324914	0.292645	-1.11027
Airways	X6_110798	BMI_CAT	BMI_CAToverweight	1	0.267354	92	0.998364	0.434783	1.44118	-0.516193	0.465384	-1.10918
Urogenital tract	X6_44338	DSUBFED	DSUBFED	1	0.267627	64	0.34554	0.0625	1.19836	1.34301	1.21151	1.10854
Airways	X6_141640	DSUBFED	DSUBFED	1	0.268186	88	0.447164	0.0909091	1.36952	-1.03383	0.933688	-1.10725
Gastrointestinal tract	X6_152703	MURICA	MURICATRUE	1	0.268205	111	0.76316	0.216216	0.500955	1.18677	1.07186	1.10721
Oral	X7_21650	BMI_CAT	BMI_CATobese	1	0.269073	379	0.720484	0.197889	1.38997	-0.564528	0.510793	-1.1052
Gastrointestinal tract	X6_181184	OCPTN_ST	OCPTN_STTRUE	1	0.269357	46	0.635305	0.152174	1	0.993304	0.899288	1.10454
Gastrointestinal tract	X6_96390	OCPTN_ST	OCPTN_STTRUE	1	0.269357	46	0.635305	0.152174	1	0.993304	0.899288	1.10454
Gastrointestinal tract	X6_86151	DSUBFED	DSUBFED	1	0.269784	108	0.720396	0.805556	1.18299	0.539738	0.489088	1.10356
Oral	X6_76803	EDLVL_BS	EDLVL_BSTRUE	1	0.269951	44	0.903424	0.295455	0.903424	-0.8475	0.768237	-1.10318
Gastrointestinal tract	X6_119084	DCMCODE_13	DCMCODE_13TRUE	1	0.270411	46	0.885327	0.282609	0.688113	-1.25152	1.13556	-1.10212
Oral	X6_72946	EDLVL_BS	EDLVL_BSTRUE	1	0.270975	44	0.903424	0.704545	0.903424	-1.00836	0.916005	-1.10082
Oral	X6_118862	OCPTN_ST	OCPTN_STTRUE	1	0.271073	77	0.603215	0.857143	1	0.765644	0.695664	1.1006
Urogenital tract	X6_99092	MURICA	MURICATRUE	1	0.271427	64	0.34554	0.0625	0.405114	-1.50408	1.36761	-1.09978
Urogenital tract	X6_90240	MURICA	MURICATRUE	1	0.271427	64	0.34554	0.0625	0.405114	-1.50408	1.36761	-1.09978
Oral	X6_58645	MURICA	MURICATRUE	1	0.271741	379	0.898134	0.688654	0.512293	0.369578	0.336267	1.09906
Oral	X6_61889	EDLVL_BS	EDLVL_BSTRUE	1	0.271842	44	0.930381	0.681818	0.903424	1.03623	0.943026	1.09883
Gastrointestinal tract	X6_95094	DCMCODE_13	DCMCODE_13TRUE	1	0.272822	46	0.266976	0.956522	0.688113	-1.62824	1.48483	-1.09659
Gastrointestinal tract	X6_147771	BMI_CAT	BMI_CATobese	1	0.273227	111	0.727858	0.198198	1.43492	-1.19288	1.08873	-1.09566
Oral	X6_196633	DCMCODE_13	DCMCODE_13TRUE	1	0.273385	80	0.735226	0.8	0.621261	1.2123	1.10682	1.0953
Oral	X6_92251	OCPTN_ST	OCPTN_STTRUE	1	0.27382	77	0.603215	0.142857	1	0.77704	0.710074	1.09431
Gastrointestinal tract	X6_60553	DCMCODE_13	DCMCODE_13TRUE	1	0.273916	46	0.818534	0.76087	0.688113	-0.938911	0.858167	-1.09409
Oral	X6_64207	BMI_CAT	BMI_CATobese	1	0.273926	379	0.843442	0.730871	1.38997	-0.411272	0.375911	-1.09407
Oral	X6_156982	OCPTN_ST	OCPTN_STTRUE	1	0.274657	77	0.667687	0.831169	1	-0.721459	0.660434	-1.0924
Oral	X6_109231	BMI_CAT	BMI_CATobese	1	0.274724	379	0.984793	0.580475	1.38997	0.391611	0.358536	1.09225
Oral	X6_144884	OCPTN_ST	OCPTN_STTRUE	1	0.2758	77	0.751314	0.792208	1	-0.683077	0.62679	-1.0898
Airways	X6_31735	DSUBFED	DSUBFED	1	0.275966	88	0.159384	0.0227273	1.36952	-1.74296	1.59989	-1.08943
Urogenital tract	X6_170154	DSUBFED	DSUBFED	1	0.276109	64	0.205676	0.03125	1.19836	-1.36921	1.25719	-1.0891
Urogenital tract	X6_30726	DSUBFED	DSUBFED	1	0.2766	64	0.509889	0.109375	1.19836	0.985743	0.906023	1.08799
Oral	X6_62025	DSUDIET	DSUDIET	1	0.277252	365	0.838641	0.734247	0.222786	-0.315027	0.289943	-1.08651
Skin	X6_31735	DSUBFED	DSUBFED	1	0.277393	23	0.595609	0.130435	1.55818	1.05651	0.972671	1.08619
Oral	X6_49947	BMI_CAT	BMI_CAToverweight	1	0.277584	379	0.789376	0.765172	1.38997	-0.282235	0.259942	-1.08576
Airways	X6_202842	MURICA	MURICATRUE	1	0.278136	92	0.210925	0.0326087	0.504173	-1.47456	1.35964	-1.08452
Oral	X6_37895	MURICA	MURICATRUE	1	0.278275	379	1	0.511873	0.512293	-0.3579	0.330105	-1.0842
Gastrointestinal tract	X6_211583	OCPTN_ST	OCPTN_STTRUE	1	0.278452	46	0.512449	0.891304	1	-1.12727	1.0401	-1.0838
Oral	X6_27154	OCPTN_ST	OCPTN_STTRUE	1	0.278475	77	1	0.454545	1	-0.518535	0.478463	-1.08375
Gastrointestinal tract	X6_49036	DSUBFED	DSUBFED	1	0.279035	108	0.419717	0.916667	1.18299	0.748657	0.691607	1.08249
Gastrointestinal tract	X6_97267	DSUBFED	DSUBFED	1	0.279035	108	0.419717	0.0833333	1.18299	-0.748657	0.691607	-1.08249
Gastrointestinal tract	X6_49947	OCPTN_ST	OCPTN_STTRUE	1	0.279297	46	0.577004	0.869565	1	1.26311	1.16749	1.0819
Gastrointestinal tract	X6_56715	OCPTN_ST	OCPTN_STTRUE	1	0.279297	46	0.577004	0.130435	1	-1.26311	1.16749	-1.0819
Gastrointestinal tract	X6_153601	MURICA	MURICATRUE	1	0.279977	111	0.889288	0.297297	0.500955	0.874062	0.809039	1.08037
Gastrointestinal tract	X6_71475	MURICA	MURICATRUE	1	0.280069	111	0.910727	0.684685	0.500955	-0.873576	0.808743	-1.08016
Airways	X6_66547	DSUBFED	DSUBFED	1	0.28065	88	0.218415	0.0340909	1.36952	-1.4172	1.31361	-1.07886
Airways	X6_208036	DSUBFED	DSUBFED	1	0.28065	88	0.218415	0.0340909	1.36952	-1.4172	1.31361	-1.07886
Oral	X6_199978	BMI_CAT	BMI_CAToverweight	1	0.281063	379	0.959702	0.622691	1.38997	-0.246899	0.229048	-1.07793
Oral	X6_25913	OCPTN_ST	OCPTN_STTRUE	1	0.28148	77	0.568004	0.87013	1	-0.808095	0.750321	-1.077
Gastrointestinal tract	X6_81136	DSUBFED	DSUBFED	1	0.281567	108	0.45138	0.0925926	1.18299	0.656582	0.609749	1.07681
Oral	X6_37895	EDLVL_BS	EDLVL_BSTRUE	1	0.281601	44	1	0.477273	0.903424	-0.847298	0.786918	-1.07673
Oral	X6_85044	EDLVL_BS	EDLVL_BSTRUE	1	0.281601	44	1	0.522727	0.903424	0.847298	0.786918	1.07673
Gastrointestinal tract	X6_44338	MURICA	MURICATRUE	1	0.282264	111	0.980219	0.603604	0.500955	-0.750753	0.698214	-1.07525
Oral	X6_208903	BMI_CAT	BMI_CAToverweight	1	0.282424	379	0.898134	0.688654	1.38997	-0.257254	0.23933	-1.07489
Airways	X6_205688	DSUBFED	DSUBFED	1	0.283622	88	0.32029	0.0568182	1.36952	-1.16176	1.08351	-1.07222
Oral	X6_26906	OCPTN_ST	OCPTN_STTRUE	1	0.283789	77	0.636396	0.844156	1	-0.745772	0.695783	-1.07185
Gastrointestinal tract	X6_95788	BMI_CAT	BMI_CATobese	1	0.283799	111	0.954704	0.63964	1.43492	-0.637476	0.594758	-1.07182
Airways	X6_107271	DSUBFED	DSUBFED	1	0.283923	88	0.271564	0.0454545	1.36952	-1.25716	1.17322	-1.07155
Gastrointestinal tract	X6_105225	MURICA	MURICATRUE	1	0.284256	111	0.603031	0.144144	0.500955	-0.783728	0.731904	-1.07081
Oral	X6_159659	OCPTN_ST	OCPTN_STTRUE	1	0.285694	77	0.987808	0.597403	1	-0.5203	0.487349	-1.06761
Airways	X6_202842	DSUBFED	DSUBFED	1	0.28571	88	0.218415	0.0340909	1.36952	1.01879	0.954298	1.06758
Oral	X6_127775	BMI_CAT	BMI_CAToverweight	1	0.286358	379	0.56493	0.131926	1.38997	-0.374002	0.350798	-1.06615
Oral	X6_122071	DCMCODE_13	DCMCODE_13TRUE	1	0.286455	80	0.896936	0.3	0.621261	-0.871331	0.817436	-1.06593
Airways	X6_53818	MURICA	MURICATRUE	1	0.287436	92	0.567788	0.130435	0.504173	-0.988695	0.929431	-1.06376
Gastrointestinal tract	X6_135314	BMI_CAT	BMI_CATobese	1	0.287771	111	0.889288	0.702703	1.43492	0.746679	0.70241	1.06303
Oral	X6_155466	BMI_CAT	BMI_CAToverweight	1	0.288292	379	0.675621	0.176781	1.38997	-0.32117	0.302455	-1.06188
Airways	X6_49238	BMI_CAT	BMI_CAToverweight	1	0.288648	92	0.677345	0.173913	1.44118	-0.701585	0.661191	-1.06109
Oral	X6_173387	DSUDIET	DSUDIET	1	0.288703	365	0.790838	0.764384	0.222786	-0.313299	0.295295	-1.06097
Oral	X6_146554	OCPTN_ST	OCPTN_STTRUE	1	0.288948	77	0.911497	0.688312	1	-0.553312	0.52178	-1.06043
Gastrointestinal tract	X6_85774	BMI_CAT	BMI_CATobese	1	0.289289	111	0.865561	0.720721	1.43492	0.744065	0.702158	1.05968
Gastrointestinal tract	X6_145397	MURICA	MURICATRUE	1	0.290052	111	0.996554	0.567568	0.500955	0.658465	0.622363	1.05801
Oral	X6_128749	OCPTN_ST	OCPTN_STTRUE	1	0.290105	77	0.895917	0.701299	1	0.556139	0.525706	1.05789
Oral	X6_205297	MURICA	MURICATRUE	1	0.290299	379	0.982252	0.414248	0.512293	0.366457	0.346543	1.05747
Oral	X6_25433	MURICA	MURICATRUE	1	0.290325	379	0.997662	0.456464	0.512293	-0.348701	0.329769	-1.05741
Gastrointestinal tract	X6_188170	BMI_CAT	BMI_CATobese	1	0.290563	111	0.968538	0.621622	1.43492	0.744804	0.704714	1.05689
Oral	X6_145806	BMI_CAT	BMI_CATobese	1	0.291287	379	0.741369	0.791557	1.38997	-0.434961	0.412167	-1.0553
Gastrointestinal tract	X6_57750	DCMCODE_13	DCMCODE_13TRUE	1	0.291743	46	1	0.543478	0.688113	-0.850281	0.806485	-1.05431
Gastrointestinal tract	X6_128085	BMI_CAT	BMI_CATobese	1	0.291939	111	0.985228	0.405405	1.43492	0.624297	0.592381	1.05388
Oral	X6_36193	DCMCODE_13	DCMCODE_13TRUE	1	0.293179	80	0.735226	0.2	0.621261	-1.14122	1.08566	-1.05117
Oral	X7_21650	DCMCODE_13	DCMCODE_13TRUE	1	0.293179	80	0.735226	0.2	0.621261	-1.14122	1.08566	-1.05117
Oral	X6_159261	OCPTN_ST	OCPTN_STTRUE	1	0.293712	77	0.925897	0.324675	1	-0.537934	0.512312	-1.05001
Oral	X6_109255	BMI_CAT	BMI_CATobese	1	0.294298	379	0.687237	0.182058	1.38997	-0.503971	0.480549	-1.04874
Oral	X6_53818	MURICA	MURICATRUE	1	0.294743	379	0.626314	0.155673	0.512293	-0.458301	0.437405	-1.04777
Gastrointestinal tract	X6_116571	DCMCODE_13	DCMCODE_13TRUE	1	0.294788	46	1	0.565217	0.688113	0.930716	0.888362	1.04768
Oral	X6_49238	DSUDIET	DSUDIET	1	0.294881	365	0.730315	0.20274	0.222786	0.3706	0.353804	1.04747
Oral	X6_76803	BMI_CAT	BMI_CATobese	1	0.2954	379	0.815455	0.25066	1.38997	-0.431245	0.412142	-1.04635
Gastrointestinal tract	X6_44338	DSUBFED	DSUBFED	1	0.295663	108	0.975908	0.611111	1.18299	0.39797	0.380549	1.04578
Oral	X6_17925	DSUBFED	DSUBFED	1	0.295725	365	0.89939	0.312329	1.31047	-0.199738	0.191019	-1.04564
Oral	X6_99002	BMI_CAT	BMI_CAToverweight	1	0.296254	379	0.736241	0.205805	1.38997	-0.297436	0.284764	-1.0445
Oral	X6_27154	EDLVL_BS	EDLVL_BSTRUE	1	0.297386	44	1	0.454545	0.903424	-0.76885	0.73782	-1.04206
Oral	X6_91527	EDLVL_BS	EDLVL_BSTRUE	1	0.297876	44	0.99756	0.409091	0.903424	-0.783962	0.753086	-1.041
Airways	X6_47906	DSUBFED	DSUBFED	1	0.297893	88	0.218415	0.0340909	1.36952	1.12862	1.08421	1.04096
Airways	X6_72618	DSUBFED	DSUBFED	1	0.297893	88	0.218415	0.0340909	1.36952	1.12862	1.08421	1.04096
Oral	X6_188170	DSUBFED	DSUBFED	1	0.299722	365	0.850486	0.273973	1.31047	0.214561	0.2069	1.03703
Oral	X6_209274	MURICA	MURICATRUE	1	0.300195	379	0.888826	0.30343	0.512293	-0.351296	0.339084	-1.03601
Gastrointestinal tract	X7_53884	DSUBFED	DSUBFED	1	0.300879	108	0.510338	0.888889	1.18299	0.645458	0.623902	1.03455
Oral	X6_109231	OCPTN_ST	OCPTN_STTRUE	1	0.302641	77	0.971915	0.623377	1	-0.508032	0.492859	-1.03079
Oral	X6_90845	BMI_CAT	BMI_CATobese	1	0.302917	379	0.663727	0.171504	1.38997	-0.494555	0.480058	-1.0302
Gastrointestinal tract	X6_144436	MURICA	MURICATRUE	1	0.303056	111	0.865561	0.279279	0.500955	-0.653657	0.634679	-1.0299
Gastrointestinal tract	X6_128368	OCPTN_ST	OCPTN_STTRUE	1	0.303062	46	0.635305	0.847826	1	0.954991	0.927276	1.02989
Gastrointestinal tract	X6_195565	OCPTN_ST	OCPTN_STTRUE	1	0.303062	46	0.635305	0.847826	1	0.954991	0.927276	1.02989
Skin	X6_104327	DSUBFED	DSUBFED	1	0.303365	23	0.455195	0.0869565	1.55818	1.27929	1.24294	1.02924
Skin	X6_150369	DSUBFED	DSUBFED	1	0.303365	23	0.455195	0.0869565	1.55818	1.27929	1.24294	1.02924
Skin	X6_68746	DSUBFED	DSUBFED	1	0.303365	23	0.455195	0.0869565	1.55818	1.27929	1.24294	1.02924
Skin	X6_105925	DSUBFED	DSUBFED	1	0.303365	23	0.455195	0.0869565	1.55818	1.27929	1.24294	1.02924
Oral	X6_44338	BMI_CAT	BMI_CAToverweight	1	0.303972	379	0.882383	0.701847	1.38997	-0.24958	0.242793	-1.02795
Gastrointestinal tract	X6_137666	BMI_CAT	BMI_CAToverweight	1	0.304272	111	0.500955	0.891892	1.43492	-0.730414	0.710992	-1.02732
Gastrointestinal tract	X6_202994	BMI_CAT	BMI_CATobese	1	0.304733	111	0.810899	0.756757	1.43492	-0.65377	0.636994	-1.02634
Oral	X6_26906	DSUDIET	DSUDIET	1	0.304859	365	0.790838	0.764384	0.222786	-0.303093	0.295393	-1.02607
Gastrointestinal tract	X6_203385	BMI_CAT	BMI_CAToverweight	1	0.304995	111	0.795655	0.765766	1.43492	0.531339	0.517984	1.02578
Gastrointestinal tract	X6_183641	BMI_CAT	BMI_CATobese	1	0.305018	111	0.825497	0.252252	1.43492	-0.844373	0.823191	-1.02573
Oral	X6_118862	MURICA	MURICATRUE	1	0.305337	379	0.593034	0.85752	0.512293	-0.562595	0.548843	-1.02506
Gastrointestinal tract	X6_60151	DSUBFED	DSUBFED	1	0.305483	108	0.419717	0.0833333	1.18299	0.660882	0.644922	1.02475
Gastrointestinal tract	X6_42014	DSUBFED	DSUBFED	1	0.305483	108	0.419717	0.916667	1.18299	-0.660882	0.644922	-1.02475
Gastrointestinal tract	X6_170154	DSUBFED	DSUBFED	1	0.305512	108	0.537858	0.87963	1.18299	0.622084	0.607098	1.02469
Gastrointestinal tract	X6_139150	BMI_CAT	BMI_CATobese	1	0.306165	111	0.795655	0.234234	1.43492	0.651374	0.636542	1.0233
Gastrointestinal tract	X6_42437	BMI_CAT	BMI_CATobese	1	0.306804	111	0.727858	0.801802	1.43492	-0.667688	0.653346	-1.02195
Gastrointestinal tract	X6_115024	DCMCODE_13	DCMCODE_13TRUE	1	0.306888	46	0.77935	0.217391	0.688113	0.885816	0.86694	1.02177
Oral	X6_44338	OCPTN_ST	OCPTN_STTRUE	1	0.307225	77	0.895917	0.701299	1	-0.546744	0.535465	-1.02106
Gastrointestinal tract	X6_185741	MURICA	MURICATRUE	1	0.307256	111	0.442807	0.0900901	0.500955	-0.884519	0.866329	-1.021
Oral	X6_184360	OCPTN_ST	OCPTN_STTRUE	1	0.308451	77	1	0.454545	1	-0.491272	0.482359	-1.01848
Oral	X6_123660	EDLVL_BS	EDLVL_BSTRUE	1	0.308571	44	1	0.431818	0.903424	-0.758805	0.745224	-1.01822
Gastrointestinal tract	X6_115024	BMI_CAT	BMI_CATobese	1	0.309378	111	0.648049	0.162162	1.43492	0.70702	0.695524	1.01653
Gastrointestinal tract	X6_107271	DSUBFED	DSUBFED	1	0.309395	108	0.8222	0.75	1.18299	0.434769	0.427715	1.01649
Gastrointestinal tract	X6_55806	DCMCODE_13	DCMCODE_13TRUE	1	0.309813	46	1	0.521739	0.688113	-0.832852	0.820047	-1.01562
Oral	X6_62357	DSUBFED	DSUBFED	1	0.309969	365	0.627611	0.156164	1.31047	-0.252441	0.24864	-1.01529
Airways	X6_39471	MURICA	MURICATRUE	1	0.310191	92	0.262466	0.0434783	0.504173	-1.33211	1.31265	-1.01482
Oral	X6_142117	BMI_CAT	BMI_CATobese	1	0.310339	379	0.936055	0.348285	1.38997	-0.37661	0.371224	-1.01451
Gastrointestinal tract	X6_80255	DCMCODE_13	DCMCODE_13TRUE	1	0.310348	46	0.937734	0.326087	0.688113	0.821343	0.80961	1.01449
Gastrointestinal tract	X6_149327	DSUBFED	DSUBFED	1	0.31084	108	0.537858	0.87963	1.18299	0.564768	0.557267	1.01346
Gastrointestinal tract	X6_174007	OCPTN_ST	OCPTN_STTRUE	1	0.311155	46	0.885327	0.282609	1	-0.740707	0.731344	-1.0128
Gastrointestinal tract	X6_135314	MURICA	MURICATRUE	1	0.31147	111	0.889288	0.702703	0.500955	-0.815139	0.80536	-1.01214
Gastrointestinal tract	X6_95845	MURICA	MURICATRUE	1	0.311556	111	0.974651	0.612613	0.500955	0.643414	0.635808	1.01196
Gastrointestinal tract	X6_118674	DSUBFED	DSUBFED	1	0.311559	108	0.836711	0.740741	1.18299	0.45152	0.446185	1.01196
Gastrointestinal tract	X6_56347	MURICA	MURICATRUE	1	0.311733	111	0.727858	0.801802	0.500955	-1.08605	1.07361	-1.01159
Oral	X6_158611	BMI_CAT	BMI_CATobese	1	0.311998	379	0.586135	0.139842	1.38997	0.455189	0.450219	1.01104
Gastrointestinal tract	X6_77009	BMI_CAT	BMI_CAToverweight	1	0.312078	111	0.442807	0.0900901	1.43492	0.715075	0.707386	1.01087
Gastrointestinal tract	X6_131335	OCPTN_ST	OCPTN_STTRUE	1	0.312145	46	0.688113	0.173913	1	-0.911432	0.901754	-1.01073
Gastrointestinal tract	X6_130646	DCMCODE_13	DCMCODE_13TRUE	1	0.312246	46	0.577004	0.130435	0.688113	0.990953	0.980636	1.01052
Gastrointestinal tract	X6_140225	DCMCODE_13	DCMCODE_13TRUE	1	0.312246	46	0.577004	0.869565	0.688113	-0.990953	0.980636	-1.01052
Gastrointestinal tract	X6_104618	DCMCODE_13	DCMCODE_13TRUE	1	0.312246	46	0.577004	0.869565	0.688113	-0.990953	0.980636	-1.01052
Gastrointestinal tract	X6_111258	DCMCODE_13	DCMCODE_13TRUE	1	0.312246	46	0.577004	0.130435	0.688113	0.990953	0.980636	1.01052
Gastrointestinal tract	X6_100105	OCPTN_ST	OCPTN_STTRUE	1	0.312481	46	0.885327	0.717391	1	-0.802005	0.794041	-1.01003
Oral	X6_72839	EDLVL_BS	EDLVL_BSTRUE	1	0.313246	44	0.953511	0.659091	0.903424	0.821151	0.814284	1.00843
Gastrointestinal tract	X6_143839	BMI_CAT	BMI_CAToverweight	1	0.314777	111	0.709098	0.189189	1.43492	0.531094	0.528321	1.00525
Gastrointestinal tract	X6_104327	BMI_CAT	BMI_CATobese	1	0.314979	111	0.745871	0.792793	1.43492	0.820798	0.816853	1.00483
Gastrointestinal tract	X6_117241	DCMCODE_13	DCMCODE_13TRUE	1	0.315105	46	0.818534	0.23913	0.688113	0.843756	0.839919	1.00457
Gastrointestinal tract	X7_214048	DCMCODE_13	DCMCODE_13TRUE	1	0.315105	46	0.818534	0.76087	0.688113	-0.843756	0.839919	-1.00457
Oral	X6_36135	DSUDIET	DSUDIET	1	0.31528	365	0.614057	0.150685	0.222786	0.428625	0.42683	1.00421
Gastrointestinal tract	X6_134746	OCPTN_ST	OCPTN_STTRUE	1	0.315457	46	0.818534	0.76087	1	-0.737909	0.735088	-1.00384
Gastrointestinal tract	X6_75391	OCPTN_ST	OCPTN_STTRUE	1	0.315457	46	0.818534	0.23913	1	0.737909	0.735088	1.00384
Gastrointestinal tract	X6_120400	DCMCODE_13	DCMCODE_13TRUE	1	0.315684	46	0.958712	0.652174	0.688113	-0.797695	0.795019	-1.00337
Oral	X6_105225	EDLVL_BS	EDLVL_BSTRUE	1	0.315767	44	1	0.522727	0.903424	0.887866	0.885039	1.0032
Gastrointestinal tract	X6_139761	BMI_CAT	BMI_CAToverweight	1	0.315895	111	0.689564	0.18018	1.43492	0.52919	0.527644	1.00293
Gastrointestinal tract	X6_183998	DSUBFED	DSUBFED	1	0.317889	108	0.589412	0.138889	1.18299	-0.52978	0.530413	-0.998805
Gastrointestinal tract	X6_123414	BMI_CAT	BMI_CAToverweight	1	0.317995	111	1	0.468468	1.43492	0.420593	0.421189	0.998586
Oral	X6_90481	MURICA	MURICATRUE	1	0.318076	379	0.746436	0.788918	0.512293	0.368229	0.368812	0.998419
Gastrointestinal tract	X6_174427	OCPTN_ST	OCPTN_STTRUE	1	0.31873	46	0.818534	0.23913	1	-0.759184	0.761413	-0.997072
Oral	X6_199978	BMI_CAT	BMI_CATobese	1	0.318939	379	0.959702	0.622691	1.38997	-0.344794	0.345956	-0.99664
Oral	X6_90481	BMI_CAT	BMI_CATobese	1	0.319646	379	0.746436	0.788918	1.38997	-0.408427	0.410402	-0.995186
Oral	X6_26759	DCMCODE_13	DCMCODE_13TRUE	1	0.31994	80	1	0.45	0.621261	0.632887	0.636336	0.99458
Gastrointestinal tract	X6_144436	DSUBFED	DSUBFED	1	0.319991	108	0.876369	0.287037	1.18299	0.399258	0.401475	0.994477
Gastrointestinal tract	X6_33238	BMI_CAT	BMI_CATobese	1	0.321257	111	0.625998	0.153153	1.43492	0.771145	0.777459	0.991879
Gastrointestinal tract	X6_85519	BMI_CAT	BMI_CATobese	1	0.321547	111	0.500955	0.891892	1.43492	-0.771271	0.778053	-0.991283
Gastrointestinal tract	X6_80255	DSUBFED	DSUBFED	1	0.322135	108	0.899705	0.305556	1.18299	-0.394475	0.398427	-0.99008
Gastrointestinal tract	X7_147498	DSUBFED	DSUBFED	1	0.322414	108	0.757272	0.212963	1.18299	0.441435	0.446115	0.989508
Gastrointestinal tract	X6_77477	BMI_CAT	BMI_CAToverweight	1	0.322482	111	0.900289	0.306306	1.43492	0.452285	0.457144	0.98937
Oral	X6_212883	BMI_CAT	BMI_CATobese	1	0.322658	379	0.8583	0.279683	1.38997	0.354653	0.358594	0.98901
Gastrointestinal tract	X6_92939	BMI_CAT	BMI_CATobese	1	0.323187	111	0.625998	0.153153	1.43492	0.684239	0.692599	0.98793
Gastrointestinal tract	X6_133809	OCPTN_ST	OCPTN_STTRUE	1	0.323247	46	0.97611	0.369565	1	-0.648125	0.656125	-0.987808
Gastrointestinal tract	X6_143839	DSUBFED	DSUBFED	1	0.323726	108	0.720396	0.194444	1.18299	-0.471763	0.478059	-0.98683
Oral	X6_118862	BMI_CAT	BMI_CAToverweight	1	0.323963	379	0.593034	0.85752	1.38997	-0.306879	0.311128	-0.986346
Gastrointestinal tract	X6_142856	OCPTN_ST	OCPTN_STTRUE	1	0.324939	46	0.958712	0.652174	1	0.66135	0.671859	0.98436
Oral	X7_123707	DCMCODE_13	DCMCODE_13TRUE	1	0.324947	80	0.970205	0.375	0.621261	-0.71132	0.722634	-0.984343
Urogenital tract	X6_160917	MURICA	MURICATRUE	1	0.32514	64	0.973668	0.375	0.405114	-0.964268	0.979996	-0.983951
Oral	X6_119084	DCMCODE_13	DCMCODE_13TRUE	1	0.326274	80	0.880927	0.2875	0.621261	-0.803068	0.818083	-0.981646
Oral	X6_145806	MURICA	MURICATRUE	1	0.326309	379	0.741369	0.791557	0.512293	-0.429928	0.437998	-0.981576
Oral	X6_93460	BMI_CAT	BMI_CATobese	1	0.326356	379	0.928679	0.340369	1.38997	0.342504	0.348967	0.981481
Skin	X6_117494	OCPTN_ST	OCPTN_STTRUE	1	0.326959	13	0.863121	0.230769	1	-1.38629	1.41421	-0.980258
Skin	X6_139150	OCPTN_ST	OCPTN_STTRUE	1	0.326959	13	0.863121	0.230769	1	-1.38629	1.41421	-0.980258
Skin	X6_148764	OCPTN_ST	OCPTN_STTRUE	1	0.326959	13	0.970951	0.307692	1	-1.38629	1.41421	-0.980258
Skin	X6_158772	OCPTN_ST	OCPTN_STTRUE	1	0.326959	13	0.863121	0.230769	1	-1.38629	1.41421	-0.980258
Skin	X6_165971	OCPTN_ST	OCPTN_STTRUE	1	0.326959	13	0.863121	0.230769	1	-1.38629	1.41421	-0.980258
Skin	X6_173132	OCPTN_ST	OCPTN_STTRUE	1	0.326959	13	0.863121	0.230769	1	-1.38629	1.41421	-0.980258
Skin	X6_30143	OCPTN_ST	OCPTN_STTRUE	1	0.326959	13	0.970951	0.307692	1	-1.38629	1.41421	-0.980258
Skin	X6_44338	OCPTN_ST	OCPTN_STTRUE	1	0.326959	13	0.863121	0.230769	1	-1.38629	1.41421	-0.980258
Skin	X6_96390	OCPTN_ST	OCPTN_STTRUE	1	0.326959	13	0.863121	0.230769	1	-1.38629	1.41421	-0.980258
Oral	X6_146554	MURICA	MURICATRUE	1	0.327066	379	0.915484	0.672823	0.512293	0.328059	0.33474	0.98004
Oral	X6_37924	OCPTN_ST	OCPTN_STTRUE	1	0.327336	77	0.98049	0.61039	1	-0.503087	0.51362	-0.979493
Gastrointestinal tract	X6_134746	BMI_CAT	BMI_CATobese	1	0.327455	111	0.745871	0.792793	1.43492	1.06934	1.092	0.979253
Oral	X6_93460	EDLVL_BS	EDLVL_BSTRUE	1	0.327884	44	0.972736	0.363636	0.903424	-0.739544	0.755882	-0.978385
Gastrointestinal tract	X6_77477	OCPTN_ST	OCPTN_STTRUE	1	0.327981	46	0.913278	0.304348	1	-0.681585	0.696783	-0.978189
Gastrointestinal tract	X6_90240	MURICA	MURICATRUE	1	0.328643	111	0.968538	0.621622	0.500955	0.604936	0.619271	0.976852
Oral	X6_116723	DSUBFED	DSUBFED	1	0.329132	365	0.969667	0.391781	1.31047	-0.179221	0.183654	-0.975864
Urogenital tract	X6_49036	DSUBFED	DSUBFED	1	0.329799	64	0.205676	0.03125	1.19836	1.21735	1.24918	0.974518
Urogenital tract	X6_57668	DSUBFED	DSUBFED	1	0.329799	64	0.205676	0.03125	1.19836	1.21735	1.24918	0.974518
Gastrointestinal tract	X6_114478	MURICA	MURICATRUE	1	0.330069	111	0.625998	0.153153	0.500955	-0.709389	0.728344	-0.973975
Oral	X6_39457	DSUBFED	DSUBFED	1	0.330093	365	0.99671	0.547945	1.31047	0.173283	0.177922	0.973927
Oral	X6_66152	EDLVL_BS	EDLVL_BSTRUE	1	0.330282	44	0.972736	0.636364	0.903424	-0.791704	0.813218	-0.973546
Oral	X6_69531	DCMCODE_13	DCMCODE_13TRUE	1	0.330907	80	0.970205	0.375	0.621261	0.616752	0.63433	0.972289
Oral	X6_25913	BMI_CAT	BMI_CATobese	1	0.331031	379	0.692943	0.815303	1.38997	-0.402269	0.413841	-0.972039
Oral	X6_49947	MURICA	MURICATRUE	1	0.33144	379	0.789376	0.765172	0.512293	0.34875	0.359086	0.971217
Gastrointestinal tract	X6_123414	MURICA	MURICATRUE	1	0.331489	111	1	0.468468	0.500955	0.626945	0.645591	0.971118
Skin	X6_99853	DSUBFED	DSUBFED	1	0.331822	23	0.802859	0.217391	1.55818	-1.1548	1.18996	-0.97045
Gastrointestinal tract	X6_72839	OCPTN_ST	OCPTN_STTRUE	1	0.332013	46	0.937734	0.673913	1	0.656852	0.67712	0.970068
Oral	X6_97267	BMI_CAT	BMI_CAToverweight	1	0.332177	379	0.835707	0.736148	1.38997	-0.238371	0.245809	-0.969738
Oral	X6_142117	DSUDIET	DSUDIET	1	0.333134	365	0.928195	0.339726	0.222786	-0.381481	0.394165	-0.967821
Gastrointestinal tract	X6_95094	MURICA	MURICATRUE	1	0.333475	111	0.442807	0.90991	0.500955	0.832447	0.860733	0.967137
Oral	X6_97267	MURICA	MURICATRUE	1	0.333803	379	0.835707	0.736148	0.512293	-0.383447	0.396745	-0.966483
Gastrointestinal tract	X6_202734	BMI_CAT	BMI_CAToverweight	1	0.334129	111	0.961888	0.630631	1.43492	0.426917	0.44202	0.965831
Airways	X6_149327	BMI_CAT	BMI_CATobese	1	0.334387	92	0.153772	0.0217391	1.44118	1.42591	1.47715	0.965315
Oral	X6_39471	BMI_CAT	BMI_CATobese	1	0.334528	379	0.756388	0.783641	1.38997	-0.381992	0.395833	-0.965033
Oral	X6_58645	DSUDIET	DSUDIET	1	0.334566	365	0.896235	0.690411	0.222786	-0.277155	0.28722	-0.964957
Airways	X6_141640	BMI_CAT	BMI_CAToverweight	1	0.334652	92	0.504173	0.108696	1.44118	-0.832451	0.862835	-0.964786
Oral	X6_63853	OCPTN_ST	OCPTN_STTRUE	1	0.334777	77	0.925897	0.675325	1	-0.492521	0.510629	-0.964538
Airways	X6_36135	BMI_CAT	BMI_CAToverweight	1	0.335445	92	0.469748	0.0978261	1.44118	-0.829056	0.860727	-0.963205
Oral	X6_173387	BMI_CAT	BMI_CAToverweight	1	0.336024	379	0.79386	0.762533	1.38997	-0.249177	0.259006	-0.962051
Oral	X6_57018	EDLVL_BS	EDLVL_BSTRUE	1	0.336631	44	0.798759	0.772727	0.903424	0.811162	0.844219	0.960843
Gastrointestinal tract	X6_174007	BMI_CAT	BMI_CAToverweight	1	0.337034	111	0.910727	0.315315	1.43492	0.429562	0.447441	0.960042
Oral	X6_142117	DSUBFED	DSUBFED	1	0.337077	365	0.928195	0.339726	1.31047	0.187315	0.195129	0.959958
Skin	X6_61652	BMI_CAT	BMI_CATobese	1	0.337801	26	0.414864	0.0769231	1.35031	1.63901	1.70994	0.958519
Skin	X6_33024	BMI_CAT	BMI_CATobese	1	0.337801	26	0.414864	0.0769231	1.35031	1.63901	1.70994	0.958519
Oral	X6_209274	EDLVL_BS	EDLVL_BSTRUE	1	0.338446	44	0.903424	0.295455	0.903424	-0.752653	0.786273	-0.957241
Oral	X6_53818	EDLVL_BS	EDLVL_BSTRUE	1	0.338446	44	0.903424	0.295455	0.903424	-0.752653	0.786273	-0.957241
Oral	X6_29169	OCPTN_ST	OCPTN_STTRUE	1	0.340138	77	1	0.454545	1	-0.457345	0.479451	-0.953892
Oral	X6_196633	EDLVL_BS	EDLVL_BSTRUE	1	0.340435	44	0.707067	0.818182	0.903424	0.844792	0.886171	0.953306
Airways	X6_127818	BMI_CAT	BMI_CAToverweight	1	0.340847	92	0.309787	0.0543478	1.44118	-1.09208	1.14655	-0.952493
Oral	X6_30161	EDLVL_BS	EDLVL_BSTRUE	1	0.341304	44	1	0.431818	0.903424	0.853462	0.896878	0.951593
Airways	X6_110798	DCMCODE_13	DCMCODE_13TRUE	1	0.341388	19	1	0.473684	0.8916	-1.09861	1.1547	-0.951426
Gastrointestinal tract	X7_214048	BMI_CAT	BMI_CATobese	1	0.342099	111	0.974651	0.612613	1.43492	-0.553936	0.583075	-0.950026
Oral	X6_125450	BMI_CAT	BMI_CATobese	1	0.34211	379	0.698582	0.812665	1.38997	-0.405094	0.426412	-0.950005
Urogenital tract	X6_56657	BMI_CAT	BMI_CATobese	1	0.342278	64	0.34554	0.0625	1.45931	1.44765	1.52437	0.949674
Gastrointestinal tract	X6_113649	DCMCODE_13	DCMCODE_13TRUE	1	0.34294	46	0.853794	0.73913	0.688113	-0.812038	0.856244	-0.948373
Gastrointestinal tract	X6_17925	DSUBFED	DSUBFED	1	0.34297	108	0.962957	0.62963	1.18299	0.361249	0.380938	0.948313
Gastrointestinal tract	X6_66530	DCMCODE_13	DCMCODE_13TRUE	1	0.343178	46	0.359673	0.934783	0.688113	-1.29928	1.37069	-0.947905
Oral	X6_173387	EDLVL_BS	EDLVL_BSTRUE	1	0.343239	44	0.65361	0.840909	0.903424	-1.15462	1.21823	-0.947786
Gastrointestinal tract	X6_105476	DCMCODE_13	DCMCODE_13TRUE	1	0.344587	46	1	0.456522	0.688113	0.766408	0.810893	0.94514
Oral	X6_125450	MURICA	MURICATRUE	1	0.344956	379	0.698582	0.812665	0.512293	-0.437834	0.463602	-0.944418
Gastrointestinal tract	X6_42437	MURICA	MURICATRUE	1	0.345983	111	0.727858	0.801802	0.500955	-1.02118	1.08359	-0.94241
Gastrointestinal tract	X6_120400	BMI_CAT	BMI_CAToverweight	1	0.34605	111	0.996554	0.567568	1.43492	0.402812	0.427487	0.942279
Gastrointestinal tract	X6_77477	DSUBFED	DSUBFED	1	0.346176	108	0.899705	0.305556	1.18299	-0.400044	0.424661	-0.942032
Gastrointestinal tract	X6_42437	BMI_CAT	BMI_CAToverweight	1	0.346263	111	0.727858	0.801802	1.43492	0.553753	0.587934	0.941863
Oral	X6_184627	OCPTN_ST	OCPTN_STTRUE	1	0.346348	77	0.776065	0.779221	1	-0.551276	0.585406	-0.941697
Oral	X6_188170	EDLVL_BS	EDLVL_BSTRUE	1	0.346537	44	0.930381	0.318182	0.903424	0.855878	0.909224	0.941327
Oral	X6_63853	EDLVL_BS	EDLVL_BSTRUE	1	0.346537	44	0.930381	0.681818	0.903424	-0.855878	0.909224	-0.941327
Gastrointestinal tract	X6_188170	DSUBFED	DSUBFED	1	0.346548	108	0.955631	0.638889	1.18299	0.360183	0.382641	0.941307
Oral	X6_90845	BMI_CAT	BMI_CAToverweight	1	0.347528	379	0.663727	0.171504	1.38997	-0.282511	0.300738	-0.939395
Oral	X6_210706	MURICA	MURICATRUE	1	0.348537	379	0.823715	0.744063	0.512293	0.329901	0.35192	0.937431
Oral	X6_118674	OCPTN_ST	OCPTN_STTRUE	1	0.348744	77	0.821281	0.246753	1	-0.527562	0.563015	-0.937029
Gastrointestinal tract	X6_194092	BMI_CAT	BMI_CAToverweight	1	0.348845	111	0.996554	0.567568	1.43492	0.400298	0.427289	0.936832
Oral	X6_199978	OCPTN_ST	OCPTN_STTRUE	1	0.348849	77	0.951215	0.649351	1	-0.476552	0.508689	-0.936824
Gastrointestinal tract	X6_121134	BMI_CAT	BMI_CAToverweight	1	0.349181	111	0.993454	0.576577	1.43492	0.400407	0.427703	0.93618
Urogenital tract	X6_47906	DSUBFED	DSUBFED	1	0.349222	64	0.279733	0.046875	1.19836	-1.1009	1.17604	-0.9361
Oral	X7_21650	MURICA	MURICATRUE	1	0.35028	379	0.720484	0.197889	0.512293	-0.353204	0.378144	-0.934047
Oral	X6_49238	DSUBFED	DSUBFED	1	0.350949	365	0.730315	0.20274	1.31047	0.226446	0.242773	0.932751
Oral	X6_24722	MURICA	MURICATRUE	1	0.351162	379	0.987163	0.575198	0.512293	0.307274	0.329574	0.932338
Oral	X6_211583	MURICA	MURICATRUE	1	0.351946	379	0.978123	0.406332	0.512293	-0.313512	0.336812	-0.930822
Urogenital tract	X6_26486	DSUBFED	DSUBFED	1	0.352471	64	0.279733	0.046875	1.19836	-0.970339	1.04359	-0.929807
Oral	X6_123660	BMI_CAT	BMI_CAToverweight	1	0.352901	379	0.999956	0.472296	1.38997	-0.208005	0.223907	-0.928978
Gastrointestinal tract	X6_134746	DCMCODE_13	DCMCODE_13TRUE	1	0.3535	46	0.818534	0.76087	0.688113	-0.776765	0.837192	-0.927822
Airways	X6_49238	MURICA	MURICATRUE	1	0.353779	92	0.677345	0.173913	0.504173	-0.865217	0.933066	-0.927284
Oral	X6_29169	DSUDIET	DSUDIET	1	0.353784	365	0.966097	0.386301	0.222786	0.267376	0.288346	0.927275
Oral	X6_37895	BMI_CAT	BMI_CAToverweight	1	0.354415	379	1	0.511873	1.38997	-0.205844	0.22228	-0.926059
Oral	X6_202842	BMI_CAT	BMI_CATobese	1	0.354562	379	0.725799	0.799472	1.38997	-0.379416	0.409835	-0.925777
Gastrointestinal tract	X6_90929	DCMCODE_13	DCMCODE_13TRUE	1	0.354732	46	0.77935	0.217391	0.688113	-1.10195	1.19072	-0.925451
Gastrointestinal tract	X6_161782	BMI_CAT	BMI_CAToverweight	1	0.354976	111	0.669225	0.171171	1.43492	0.510221	0.551602	0.92498
Gastrointestinal tract	X6_142856	BMI_CAT	BMI_CAToverweight	1	0.355356	111	1	0.522523	1.43492	0.389172	0.421067	0.924251
Airways	X6_81136	BMI_CAT	BMI_CAToverweight	1	0.355488	92	0.309787	0.0543478	1.44118	1.18562	1.28315	0.923997
Gastrointestinal tract	X6_92939	OCPTN_ST	OCPTN_STTRUE	1	0.356098	46	0.440556	0.0869565	1	-1.13127	1.22588	-0.922826
Gastrointestinal tract	X6_150972	OCPTN_ST	OCPTN_STTRUE	1	0.356098	46	0.440556	0.913043	1	1.13127	1.22588	0.922826
Oral	X6_213360	BMI_CAT	BMI_CAToverweight	1	0.356121	379	0.861888	0.282322	1.38997	-0.234675	0.254312	-0.922782
Gastrointestinal tract	X6_113993	DSUBFED	DSUBFED	1	0.356934	108	0.481546	0.101852	1.18299	0.554912	0.602363	0.921224
Gastrointestinal tract	X6_17925	MURICA	MURICATRUE	1	0.357342	111	0.961888	0.630631	0.500955	-0.644212	0.699894	-0.920442
Oral	X6_57018	DCMCODE_13	DCMCODE_13TRUE	1	0.357827	80	0.863784	0.725	0.621261	0.76255	0.829297	0.919514
Gastrointestinal tract	X6_158611	DSUBFED	DSUBFED	1	0.358269	108	0.863782	0.722222	1.18299	-0.380605	0.414301	-0.918668
Gastrointestinal tract	X7_213859	MURICA	MURICATRUE	1	0.358886	111	0.974651	0.612613	0.500955	0.568815	0.619969	0.91749
Gastrointestinal tract	X6_90240	DSUBFED	DSUBFED	1	0.359547	108	0.962957	0.62963	1.18299	0.355937	0.388481	0.916228
Gastrointestinal tract	X6_105476	BMI_CAT	BMI_CAToverweight	1	0.360364	111	1	0.486486	1.43492	0.389472	0.425805	0.914672
Gastrointestinal tract	X6_183699	MURICA	MURICATRUE	1	0.360656	111	0.669225	0.171171	0.500955	0.992661	1.08592	0.914116
Gastrointestinal tract	X6_56043	DCMCODE_13	DCMCODE_13TRUE	1	0.36084	46	0.635305	0.847826	0.688113	-0.882406	0.965681	-0.913765
Gastrointestinal tract	X6_116015	DCMCODE_13	DCMCODE_13TRUE	1	0.36084	46	0.635305	0.152174	0.688113	0.882406	0.965681	0.913765
Gastrointestinal tract	X6_195565	DCMCODE_13	DCMCODE_13TRUE	1	0.36084	46	0.635305	0.847826	0.688113	-0.882406	0.965681	-0.913765
Gastrointestinal tract	X6_149008	BMI_CAT	BMI_CAToverweight	1	0.361105	111	1	0.459459	1.43492	-0.407791	0.446522	-0.913261
Gastrointestinal tract	X6_174007	DCMCODE_13	DCMCODE_13TRUE	1	0.361632	46	0.885327	0.282609	0.688113	0.822657	0.90178	0.912259
Gastrointestinal tract	X6_118862	DCMCODE_13	DCMCODE_13TRUE	1	0.361632	46	0.885327	0.717391	0.688113	-0.822657	0.90178	-0.912259
Airways	X6_39457	OCPTN_ST	OCPTN_STTRUE	1	0.362526	19	0.678954	0.157895	1	1.25276	1.37581	0.910563
Oral	X6_61889	DCMCODE_13	DCMCODE_13TRUE	1	0.362609	80	0.863784	0.725	0.621261	0.76214	0.837144	0.910405
Oral	X6_195894	DSUDIET	DSUDIET	1	0.362718	365	0.930805	0.342466	0.222786	0.260882	0.286621	0.910197
Gastrointestinal tract	X6_85774	MURICA	MURICATRUE	1	0.363251	111	0.865561	0.720721	0.500955	-0.733392	0.806645	-0.909188
Oral	X6_105925	BMI_CAT	BMI_CATobese	1	0.363652	379	0.843442	0.269129	1.38997	-0.359761	0.396025	-0.908429
Oral	X6_194344	OCPTN_ST	OCPTN_STTRUE	1	0.363986	77	0.667687	0.831169	1	-0.589095	0.648928	-0.907797
Oral	X6_135314	OCPTN_ST	OCPTN_STTRUE	1	0.364014	77	0.879136	0.285714	1	-0.480583	0.529426	-0.907743
Oral	X6_199448	BMI_CAT	BMI_CATobese	1	0.36424	379	0.920898	0.667546	1.38997	-0.32763	0.361098	-0.907316
Oral	X6_63853	BMI_CAT	BMI_CAToverweight	1	0.364574	379	0.918214	0.670185	1.38997	-0.212938	0.234854	-0.906684
Gastrointestinal tract	X6_131335	DSUBFED	DSUBFED	1	0.365607	108	0.757272	0.212963	1.18299	0.407491	0.450399	0.904733
Airways	X6_25913	BMI_CAT	BMI_CAToverweight	1	0.366167	92	0.353708	0.0652174	1.44118	0.875018	0.968286	0.903677
Oral	X6_196633	DSUDIET	DSUDIET	1	0.366548	365	0.666327	0.827397	0.222786	-0.282854	0.313252	-0.902958
Gastrointestinal tract	X6_110310	MURICA	MURICATRUE	1	0.367245	111	0.999951	0.45045	0.500955	-0.562969	0.62438	-0.901645
Oral	X6_69531	BMI_CAT	BMI_CAToverweight	1	0.367345	379	0.898134	0.311346	1.38997	-0.219323	0.243298	-0.901457
Gastrointestinal tract	X7_66598	BMI_CAT	BMI_CAToverweight	1	0.367526	111	0.810899	0.756757	1.43492	0.45042	0.499846	0.901118
Airways	X6_99853	BMI_CAT	BMI_CAToverweight	1	0.367837	92	0.309787	0.0543478	1.44118	0.870081	0.966184	0.900533
Oral	X6_91527	DCMCODE_13	DCMCODE_13TRUE	1	0.368174	80	0.960664	0.3625	0.621261	-0.653146	0.725799	-0.899899
Gastrointestinal tract	X6_105225	DSUBFED	DSUBFED	1	0.368909	108	0.564191	0.12963	1.18299	0.489554	0.544846	0.898519
Oral	X6_154692	MURICA	MURICATRUE	1	0.369467	379	0.725799	0.799472	0.512293	0.339043	0.377776	0.897472
Airways	X6_127818	DSUBFED	DSUBFED	1	0.369975	88	0.271564	0.0454545	1.36952	0.876527	0.977698	0.896521
Airways	X6_139150	DSUBFED	DSUBFED	1	0.369975	88	0.271564	0.0454545	1.36952	0.876527	0.977698	0.896521
Airways	X6_58645	DSUBFED	DSUBFED	1	0.369975	88	0.271564	0.0454545	1.36952	0.876527	0.977698	0.896521
Airways	X6_56043	BMI_CAT	BMI_CAToverweight	1	0.37014	92	0.309787	0.0543478	1.44118	1.12933	1.26011	0.896212
Gastrointestinal tract	X6_57750	MURICA	MURICATRUE	1	0.370452	111	1	0.540541	0.500955	-0.578453	0.645864	-0.895626
Oral	X6_49238	BMI_CAT	BMI_CATobese	1	0.371124	379	0.720484	0.197889	1.38997	-0.393991	0.440523	-0.89437
Oral	X6_69531	MURICA	MURICATRUE	1	0.371332	379	0.898134	0.311346	0.512293	0.344451	0.3853	0.893982
Oral	X6_119084	BMI_CAT	BMI_CAToverweight	1	0.372218	379	0.835707	0.263852	1.38997	-0.224952	0.252096	-0.892326
Airways	X6_53818	DCMCODE_13	DCMCODE_13TRUE	1	0.372342	19	0.8916	0.263158	0.8916	-1.16315	1.30384	-0.892096
Gastrointestinal tract	X6_33238	DSUBFED	DSUBFED	1	0.372504	108	0.636757	0.157407	1.18299	0.449582	0.504134	0.891792
Oral	X6_119084	DSUBFED	DSUBFED	1	0.37332	365	0.804574	0.243836	1.31047	0.190266	0.213717	0.890272
Oral	X6_25433	BMI_CAT	BMI_CAToverweight	1	0.373497	379	0.997662	0.456464	1.38997	-0.200657	0.225472	-0.889942
Oral	X6_91527	MURICA	MURICATRUE	1	0.373655	379	0.94961	0.364116	0.512293	-0.295058	0.331657	-0.889648
Oral	X6_92251	DSUDIET	DSUDIET	1	0.374126	365	0.585919	0.139726	0.222786	0.304284	0.342365	0.888771
Oral	X6_118674	DCMCODE_13	DCMCODE_13TRUE	1	0.374365	80	0.805252	0.2375	0.621261	0.634285	0.714022	0.888326
Airways	X6_190669	BMI_CAT	BMI_CAToverweight	1	0.374678	92	0.210925	0.0326087	1.44118	1.11339	1.25417	0.887746
Airways	X6_208036	BMI_CAT	BMI_CAToverweight	1	0.374678	92	0.210925	0.0326087	1.44118	1.11339	1.25417	0.887746
Oral	X6_158611	DCMCODE_13	DCMCODE_13TRUE	1	0.374964	80	0.681438	0.175	0.621261	-0.96956	1.09281	-0.887213
Airways	X6_39457	MURICA	MURICATRUE	1	0.375394	92	0.353708	0.0652174	0.504173	-1.12826	1.27284	-0.886415
Oral	X7_102617	DSUDIET	DSUDIET	1	0.375663	365	0.993506	0.441096	0.222786	0.253753	0.286431	0.885916
Gastrointestinal tract	X6_111258	MURICA	MURICATRUE	1	0.375738	111	0.669225	0.171171	0.500955	0.958324	1.0819	0.885776
Gastrointestinal tract	X6_189038	DCMCODE_13	DCMCODE_13TRUE	1	0.37648	46	1	0.478261	0.688113	0.710748	0.803649	0.884401
Oral	X6_149008	BMI_CAT	BMI_CATobese	1	0.376741	379	0.918214	0.329815	1.38997	0.309686	0.350356	0.883917
Gastrointestinal tract	X6_70847	BMI_CAT	BMI_CATobese	1	0.377026	111	0.709098	0.189189	1.43492	-0.727291	0.823296	-0.883389
Oral	X6_146554	DSUBFED	DSUBFED	1	0.377171	365	0.911508	0.676712	1.31047	-0.165693	0.187622	-0.88312
Oral	X7_102617	MURICA	MURICATRUE	1	0.377407	379	0.991386	0.435356	0.512293	-0.288616	0.326975	-0.882683
Oral	X6_53818	BMI_CAT	BMI_CAToverweight	1	0.377523	379	0.626314	0.155673	1.38997	0.274434	0.310985	0.88247
Oral	X6_30161	BMI_CAT	BMI_CATobese	1	0.377627	379	0.973611	0.398417	1.38997	-0.308864	0.350076	-0.882277
Oral	X6_108247	MURICA	MURICATRUE	1	0.377944	379	0.572084	0.134565	0.512293	0.484903	0.549969	0.881691
Gastrointestinal tract	X6_107346	MURICA	MURICATRUE	1	0.378043	111	0.648049	0.837838	0.500955	0.639649	0.72563	0.881508
Oral	X6_122071	BMI_CAT	BMI_CAToverweight	1	0.378612	379	0.770873	0.224274	1.38997	-0.235749	0.267757	-0.880457
Oral	X6_27154	DCMCODE_13	DCMCODE_13TRUE	1	0.378867	80	1	0.45	0.621261	-0.581258	0.660531	-0.879985
Oral	X6_153831	MURICA	MURICATRUE	1	0.379027	379	0.715106	0.195251	0.512293	0.406969	0.462628	0.87969
Gastrointestinal tract	X6_85519	DSUBFED	DSUBFED	1	0.379124	108	0.510338	0.888889	1.18299	0.52954	0.602085	0.879511
Gastrointestinal tract	X6_140225	DSUBFED	DSUBFED	1	0.379124	108	0.510338	0.888889	1.18299	0.52954	0.602085	0.879511
Oral	X6_26759	DSUDIET	DSUDIET	1	0.379433	365	0.945457	0.358904	0.222786	-0.295478	0.336175	-0.878941
Oral	X6_184360	BMI_CAT	BMI_CAToverweight	1	0.379797	379	0.928679	0.340369	1.38997	-0.209923	0.239018	-0.87827
Oral	X6_49947	DCMCODE_13	DCMCODE_13TRUE	1	0.380392	80	0.652195	0.8375	0.621261	-0.664539	0.757591	-0.877174
Oral	X6_154692	DCMCODE_13	DCMCODE_13TRUE	1	0.380392	80	0.652195	0.8375	0.621261	-0.664539	0.757591	-0.877174
Oral	X6_72839	MURICA	MURICATRUE	1	0.38053	379	0.966999	0.612137	0.512293	0.288752	0.32928	0.876919
Oral	X6_118862	DCMCODE_13	DCMCODE_13TRUE	1	0.380596	80	0.652195	0.8375	0.621261	-0.65844	0.750959	-0.876799
Gastrointestinal tract	X6_189038	DSUBFED	DSUBFED	1	0.380619	108	1	0.462963	1.18299	-0.323441	0.368906	-0.876757
Gastrointestinal tract	X6_73558	MURICA	MURICATRUE	1	0.380825	111	0.961888	0.630631	0.500955	-0.612721	0.699153	-0.876377
Oral	X7_21650	BMI_CAT	BMI_CAToverweight	1	0.380975	379	0.720484	0.197889	1.38997	0.237466	0.271049	0.876101
Airways	X6_26486	BMI_CAT	BMI_CATobese	1	0.381624	92	0.210925	0.0326087	1.44118	1.28555	1.46935	0.874908
Airways	X6_66547	BMI_CAT	BMI_CATobese	1	0.381624	92	0.210925	0.0326087	1.44118	1.28555	1.46935	0.874908
Oral	X6_158611	MURICA	MURICATRUE	1	0.381826	379	0.586135	0.139842	0.512293	0.480261	0.54916	0.874537
Gastrointestinal tract	X6_90887	BMI_CAT	BMI_CAToverweight	1	0.381986	111	0.52813	0.117117	1.43492	-0.740999	0.84759	-0.874242
Skin	X6_107346	DSUBFED	DSUBFED	1	0.382557	23	0.802859	0.217391	1.55818	0.822759	0.942239	0.873196
Skin	X6_56043	DSUBFED	DSUBFED	1	0.382557	23	0.802859	0.217391	1.55818	0.822759	0.942239	0.873196
Skin	X6_66547	DSUBFED	DSUBFED	1	0.382557	23	0.802859	0.217391	1.55818	0.822759	0.942239	0.873196
Oral	X6_62357	DSUDIET	DSUDIET	1	0.383217	365	0.627611	0.156164	0.222786	0.298463	0.34228	0.871985
Airways	X6_164274	DSUBFED	DSUBFED	1	0.383551	88	0.484419	0.102273	1.36952	-0.668027	0.766637	-0.871373
Airways	X6_71275	BMI_CAT	BMI_CAToverweight	1	0.383968	92	0.210925	0.0326087	1.44118	1.08565	1.247	0.870608
Airways	X6_92260	BMI_CAT	BMI_CAToverweight	1	0.383968	92	0.210925	0.0326087	1.44118	1.08565	1.247	0.870608
Gastrointestinal tract	X6_75619	BMI_CAT	BMI_CAToverweight	1	0.384305	111	0.554155	0.126126	1.43492	0.508937	0.584991	0.869991
Gastrointestinal tract	X6_58645	DSUBFED	DSUBFED	1	0.384356	108	0.564191	0.87037	1.18299	0.497328	0.571708	0.869898
Gastrointestinal tract	X6_75619	DSUBFED	DSUBFED	1	0.384356	108	0.564191	0.12963	1.18299	-0.497328	0.571708	-0.869898
Oral	X6_155466	BMI_CAT	BMI_CATobese	1	0.385028	379	0.675621	0.176781	1.38997	0.356	0.409822	0.868669
Gastrointestinal tract	X6_107346	OCPTN_ST	OCPTN_STTRUE	1	0.385078	46	0.635305	0.847826	1	-0.753469	0.867474	-0.868578
Gastrointestinal tract	X6_185741	OCPTN_ST	OCPTN_STTRUE	1	0.385078	46	0.635305	0.152174	1	0.753469	0.867474	0.868578
Gastrointestinal tract	X6_213360	OCPTN_ST	OCPTN_STTRUE	1	0.385078	46	0.635305	0.152174	1	0.753469	0.867474	0.868578
Oral	X6_92251	BMI_CAT	BMI_CAToverweight	1	0.385255	379	0.572084	0.134565	1.38997	-0.29185	0.336134	-0.868255
Gastrointestinal tract	X6_27580	OCPTN_ST	OCPTN_STTRUE	1	0.386288	46	1	0.434783	1	-0.546173	0.630416	-0.86637
Gastrointestinal tract	X6_150369	BMI_CAT	BMI_CATobese	1	0.386848	111	0.795655	0.765766	1.43492	-0.547052	0.632176	-0.865348
Gastrointestinal tract	X6_184628	DCMCODE_13	DCMCODE_13TRUE	1	0.387656	46	1	0.543478	0.688113	-0.731722	0.847022	-0.863877
Oral	X6_64207	OCPTN_ST	OCPTN_STTRUE	1	0.387905	77	0.751314	0.792208	1	0.517777	0.599679	0.863423
Gastrointestinal tract	X6_49036	BMI_CAT	BMI_CAToverweight	1	0.388055	111	0.411615	0.918919	1.43492	0.72988	0.845601	0.86315
Gastrointestinal tract	X6_133942	OCPTN_ST	OCPTN_STTRUE	1	0.388347	46	0.77935	0.217391	1	0.651558	0.755326	0.862619
Skin	X6_113953	BMI_CAT	BMI_CAToverweight	1	0.388533	26	0.546365	0.115385	1.35031	1.3178	1.52827	0.86228
Gastrointestinal tract	X6_71475	BMI_CAT	BMI_CATobese	1	0.388566	111	0.910727	0.684685	1.43492	-0.550431	0.638388	-0.86222
Oral	X6_182765	BMI_CAT	BMI_CATobese	1	0.388961	379	0.839601	0.266491	1.38997	0.315211	0.365885	0.861502
Oral	X6_149008	OCPTN_ST	OCPTN_STTRUE	1	0.389241	77	0.993736	0.415584	1	-0.415293	0.482342	-0.860994
Airways	X6_153897	BMI_CAT	BMI_CAToverweight	1	0.389696	92	0.309787	0.0543478	1.44118	0.811021	0.942862	0.860169
Airways	X6_61081	BMI_CAT	BMI_CAToverweight	1	0.390269	92	0.394769	0.076087	1.44118	0.80999	0.942803	0.85913
Oral	X6_56043	DSUBFED	DSUBFED	1	0.390539	365	0.66007	0.830137	1.31047	-0.205822	0.239707	-0.85864
Gastrointestinal tract	X6_75391	DCMCODE_13	DCMCODE_13TRUE	1	0.390929	46	0.818534	0.23913	0.688113	-0.977647	1.13954	-0.857934
Oral	X7_123707	OCPTN_ST	OCPTN_STTRUE	1	0.390967	77	0.971915	0.376623	1	-0.426159	0.496766	-0.857866
Oral	X6_177609	EDLVL_BS	EDLVL_BSTRUE	1	0.391071	44	0.99756	0.409091	0.903424	-0.629318	0.733747	-0.857677
Oral	X6_173979	EDLVL_BS	EDLVL_BSTRUE	1	0.391071	44	0.99756	0.409091	0.903424	-0.629318	0.733747	-0.857677
Oral	X6_54148	EDLVL_BS	EDLVL_BSTRUE	1	0.391071	44	0.99756	0.409091	0.903424	-0.629318	0.733747	-0.857677
Airways	X6_161782	MURICA	MURICATRUE	1	0.39149	92	0.999944	0.445652	0.504173	-0.601117	0.701486	-0.856919
Gastrointestinal tract	X6_131335	BMI_CAT	BMI_CAToverweight	1	0.391892	111	0.745871	0.207207	1.43492	0.427543	0.499354	0.856191
Gastrointestinal tract	X6_104327	OCPTN_ST	OCPTN_STTRUE	1	0.391937	46	0.577004	0.869565	1	0.820612	0.958536	0.85611
Gastrointestinal tract	X6_39471	OCPTN_ST	OCPTN_STTRUE	1	0.391937	46	0.577004	0.869565	1	0.820612	0.958536	0.85611
Skin	X6_25913	BMI_CAT	BMI_CATobese	1	0.392196	26	0.885327	0.269231	1.35031	1.02607	1.19919	0.855641
Gastrointestinal tract	X6_183998	BMI_CAT	BMI_CAToverweight	1	0.392785	111	0.579102	0.135135	1.43492	0.496985	0.581556	0.854578
Gastrointestinal tract	X6_147771	BMI_CAT	BMI_CAToverweight	1	0.393018	111	0.727858	0.198198	1.43492	0.426047	0.498792	0.854158
Gastrointestinal tract	X6_89989	OCPTN_ST	OCPTN_STTRUE	1	0.393021	46	0.998196	0.586957	1	0.543543	0.636354	0.854152
Urogenital tract	X6_47906	BMI_CAT	BMI_CATobese	1	0.393324	64	0.279733	0.046875	1.45931	1.29382	1.51572	0.853605
Urogenital tract	X6_83290	BMI_CAT	BMI_CATobese	1	0.393324	64	0.279733	0.046875	1.45931	1.29382	1.51572	0.853605
Urogenital tract	X6_84702	BMI_CAT	BMI_CATobese	1	0.393324	64	0.279733	0.046875	1.45931	1.29382	1.51572	0.853605
Oral	X6_105925	OCPTN_ST	OCPTN_STTRUE	1	0.393533	77	0.841852	0.25974	1	0.465917	0.546064	0.853228
Oral	X6_24722	BMI_CAT	BMI_CAToverweight	1	0.393757	379	0.987163	0.575198	1.38997	-0.193551	0.226952	-0.852824
Oral	X6_196633	BMI_CAT	BMI_CAToverweight	1	0.394325	379	0.698582	0.812665	1.38997	-0.241174	0.283134	-0.8518
Oral	X6_84465	MURICA	MURICATRUE	1	0.394542	379	0.675621	0.823219	0.512293	0.333877	0.392146	0.851409
Skin	X6_115024	DSUBFED	DSUBFED	1	0.39478	23	0.70964	0.173913	1.55818	1.09861	1.29099	0.850981
Skin	X6_65508	DSUBFED	DSUBFED	1	0.39478	23	0.70964	0.173913	1.55818	1.09861	1.29099	0.850981
Skin	X6_84465	DSUBFED	DSUBFED	1	0.39478	23	0.70964	0.173913	1.55818	1.09861	1.29099	0.850981
Gastrointestinal tract	X6_117241	BMI_CAT	BMI_CAToverweight	1	0.395532	111	0.795655	0.234234	1.43492	-0.438045	0.515573	-0.849629
Airways	X6_125450	DSUBFED	DSUBFED	1	0.395647	88	0.32029	0.0568182	1.36952	0.686101	0.807728	0.849421
Oral	X6_154791	BMI_CAT	BMI_CAToverweight	1	0.395923	379	0.959702	0.377309	1.38997	-0.196951	0.232	-0.848925
Gastrointestinal tract	X6_184628	BMI_CAT	BMI_CAToverweight	1	0.396635	111	1	0.504505	1.43492	0.357971	0.422311	0.847647
Skin	X6_53818	BMI_CAT	BMI_CAToverweight	1	0.397745	26	0.935842	0.307692	1.35031	0.980773	1.15978	0.845655
Gastrointestinal tract	X6_116067	BMI_CAT	BMI_CAToverweight	1	0.397798	111	0.795655	0.765766	1.43492	0.435347	0.514862	0.845561
Gastrointestinal tract	X6_113993	MURICA	MURICATRUE	1	0.398731	111	0.472547	0.0990991	0.500955	-0.720339	0.853593	-0.84389
Gastrointestinal tract	X7_147498	BMI_CAT	BMI_CAToverweight	1	0.399059	111	0.745871	0.207207	1.43492	-0.434293	0.51499	-0.843304
Gastrointestinal tract	X6_122071	BMI_CAT	BMI_CAToverweight	1	0.399698	111	0.900289	0.306306	1.43492	-0.392966	0.466616	-0.842161
Oral	X6_56668	MURICA	MURICATRUE	1	0.399725	379	0.984793	0.419525	0.512293	-0.276871	0.328782	-0.842113
Gastrointestinal tract	X6_161782	OCPTN_ST	OCPTN_STTRUE	1	0.399785	46	0.688113	0.173913	1	0.718901	0.853796	0.842005
Gastrointestinal tract	X6_135314	BMI_CAT	BMI_CAToverweight	1	0.400629	111	0.889288	0.702703	1.43492	0.387171	0.460644	0.840499
Oral	X6_105925	BMI_CAT	BMI_CAToverweight	1	0.400631	379	0.843442	0.269129	1.38997	-0.211772	0.251962	-0.840494
Oral	X6_44338	DCMCODE_13	DCMCODE_13TRUE	1	0.40202	80	0.911836	0.6875	0.621261	-0.547347	0.653143	-0.83802
Gastrointestinal tract	X6_174007	MURICA	MURICATRUE	1	0.402549	111	0.910727	0.315315	0.500955	-0.525951	0.628318	-0.837078
Oral	X6_90845	DSUDIET	DSUDIET	1	0.40268	365	0.678612	0.178082	0.222786	0.287383	0.343413	0.836844
Oral	X6_208903	BMI_CAT	BMI_CATobese	1	0.402906	379	0.898134	0.688654	1.38997	-0.299926	0.358573	-0.836443
Oral	X6_90481	DCMCODE_13	DCMCODE_13TRUE	1	0.403249	80	0.805252	0.7625	0.621261	-0.571654	0.683934	-0.835833
Oral	X6_85545	DCMCODE_13	DCMCODE_13TRUE	1	0.4034	80	0.911836	0.3125	0.621261	0.538169	0.644079	0.835564
Oral	X6_27154	BMI_CAT	BMI_CATobese	1	0.40406	379	0.955795	0.372032	1.38997	-0.302054	0.362006	-0.834391
Gastrointestinal tract	X6_122071	DCMCODE_13	DCMCODE_13TRUE	1	0.404064	46	0.989588	0.391304	0.688113	-0.738587	0.885188	-0.834384
Gastrointestinal tract	X6_105916	DCMCODE_13	DCMCODE_13TRUE	1	0.404064	46	0.989588	0.608696	0.688113	0.738587	0.885188	0.834384
Oral	X6_184627	MURICA	MURICATRUE	1	0.404173	379	0.798289	0.759894	0.512293	0.299684	0.359251	0.834191
Oral	X6_184360	DSUBFED	DSUBFED	1	0.4043	365	0.930805	0.342466	1.31047	0.160607	0.192582	0.833966
Oral	X6_184360	DSUDIET	DSUDIET	1	0.404559	365	0.930805	0.342466	0.222786	0.247979	0.297513	0.833506
Gastrointestinal tract	X6_76152	MURICA	MURICATRUE	1	0.404882	111	0.500955	0.891892	0.500955	0.725366	0.870857	0.832933
Gastrointestinal tract	X6_80255	BMI_CAT	BMI_CATobese	1	0.405421	111	0.889288	0.297297	1.43492	0.568058	0.68278	0.831978
Gastrointestinal tract	X6_128368	MURICA	MURICATRUE	1	0.405915	111	0.669225	0.828829	0.500955	0.604775	0.727678	0.831103
Oral	X6_173132	MURICA	MURICATRUE	1	0.406578	379	0.715106	0.195251	0.512293	-0.32442	0.390901	-0.82993
Oral	X6_111258	BMI_CAT	BMI_CAToverweight	1	0.408489	379	0.915484	0.672823	1.38997	-0.194064	0.234787	-0.826555
Airways	X6_161782	BMI_CAT	BMI_CATobese	1	0.408886	92	0.999944	0.445652	1.44118	-0.559056	0.676941	-0.825855
Oral	X6_155466	MURICA	MURICATRUE	1	0.409251	379	0.675621	0.176781	0.512293	0.384078	0.465429	0.825212
Gastrointestinal tract	X6_27580	MURICA	MURICATRUE	1	0.409918	111	1	0.459459	0.500955	-0.515777	0.625914	-0.824039
Gastrointestinal tract	X6_90688	MURICA	MURICATRUE	1	0.410226	111	0.900289	0.693694	0.500955	0.517542	0.628468	0.823496
Oral	X6_213360	BMI_CAT	BMI_CATobese	1	0.410285	379	0.861888	0.282322	1.38997	0.29314	0.356015	0.823392
Oral	X6_85044	DSUBFED	DSUBFED	1	0.410835	365	0.977787	0.405479	1.31047	0.149749	0.182083	0.822426
Oral	X6_184360	MURICA	MURICATRUE	1	0.411989	379	0.928679	0.340369	0.512293	-0.282175	0.343948	-0.820398
Gastrointestinal tract	X6_90240	OCPTN_ST	OCPTN_STTRUE	1	0.412639	46	0.937734	0.673913	1	-0.537308	0.655846	-0.819259
Urogenital tract	X6_39457	DSUBFED	DSUBFED	1	0.41347	64	0.34554	0.0625	1.19836	-0.716702	0.876376	-0.817802
Oral	X6_85545	BMI_CAT	BMI_CAToverweight	1	0.413969	379	0.839601	0.266491	1.38997	0.204357	0.250153	0.81693
Oral	X6_139150	EDLVL_BS	EDLVL_BSTRUE	1	0.414319	44	0.987731	0.613636	0.903424	-0.661714	0.810608	-0.816317
Gastrointestinal tract	X6_213360	DSUBFED	DSUBFED	1	0.414989	108	0.481546	0.101852	1.18299	0.505097	0.61964	0.815146
Gastrointestinal tract	X7_214048	OCPTN_ST	OCPTN_STTRUE	1	0.415228	46	0.818534	0.76087	1	-0.587787	0.721451	-0.814728
Gastrointestinal tract	X6_138599	OCPTN_ST	OCPTN_STTRUE	1	0.415593	46	0.512449	0.108696	1	0.818178	1.00502	0.81409
Oral	X6_91953	EDLVL_BS	EDLVL_BSTRUE	1	0.416168	44	0.953511	0.340909	0.903424	-0.608743	0.74868	-0.813088
Urogenital tract	X6_208036	BMI_CAT	BMI_CAToverweight	1	0.416387	64	0.279733	0.046875	1.45931	-1.04145	1.28147	-0.812705
Oral	X6_195894	BMI_CAT	BMI_CAToverweight	1	0.416436	379	0.923537	0.335092	1.38997	-0.193262	0.237826	-0.81262
Oral	X6_135314	BMI_CAT	BMI_CATobese	1	0.416443	379	0.798289	0.240106	1.38997	-0.332882	0.409647	-0.812607
Gastrointestinal tract	X6_31735	OCPTN_ST	OCPTN_STTRUE	1	0.416558	46	1	0.456522	1	0.508763	0.626241	0.812407
Gastrointestinal tract	X6_213360	DCMCODE_13	DCMCODE_13TRUE	1	0.416917	46	0.635305	0.152174	0.688113	0.773873	0.953302	0.811782
Skin	X6_107346	OCPTN_ST	OCPTN_STTRUE	1	0.417148	13	0.970951	0.307692	1	1.09861	1.35401	0.811379
Skin	X7_53884	OCPTN_ST	OCPTN_STTRUE	1	0.417148	13	0.970951	0.307692	1	1.09861	1.35401	0.811379
Skin	X6_49238	OCPTN_ST	OCPTN_STTRUE	1	0.417148	13	0.970951	0.692308	1	-1.09861	1.35401	-0.811379
Skin	X6_62357	OCPTN_ST	OCPTN_STTRUE	1	0.417148	13	1	0.615385	1	-1.09861	1.35401	-0.811379
Airways	X6_110798	OCPTN_ST	OCPTN_STTRUE	1	0.418685	19	1	0.473684	1	-0.819143	1.01291	-0.808705
Oral	X6_61652	DCMCODE_13	DCMCODE_13TRUE	1	0.41918	80	1	0.475	0.621261	0.512569	0.63449	0.807844
Skin	X6_49238	BMI_CAT	BMI_CAToverweight	1	0.419547	26	1	0.461538	1.35031	-1.1126	1.37833	-0.807207
Oral	X6_174007	BMI_CAT	BMI_CATobese	1	0.419927	379	0.645352	0.163588	1.38997	-0.4221	0.523342	-0.806548
Oral	X6_177609	MURICA	MURICATRUE	1	0.421641	379	0.973611	0.398417	0.512293	0.27938	0.34767	0.803577
Gastrointestinal tract	X7_214048	BMI_CAT	BMI_CAToverweight	1	0.421893	111	0.974651	0.612613	1.43492	0.353629	0.440308	0.803141
Urogenital tract	X6_208036	DSUBFED	DSUBFED	1	0.422301	64	0.279733	0.046875	1.19836	0.768806	0.95809	0.802436
Oral	X6_127775	DSUBFED	DSUBFED	1	0.422339	365	0.578662	0.136986	1.31047	-0.218089	0.271806	-0.80237
Gastrointestinal tract	X6_91527	BMI_CAT	BMI_CATobese	1	0.42272	111	0.669225	0.171171	1.43492	0.613743	0.765541	0.801711
Oral	X6_209274	BMI_CAT	BMI_CAToverweight	1	0.423015	379	0.888826	0.30343	1.38997	-0.193017	0.240909	-0.801201
Oral	X6_24722	BMI_CAT	BMI_CATobese	1	0.423034	379	0.987163	0.575198	1.38997	-0.277486	0.346351	-0.801169
Gastrointestinal tract	X6_118862	BMI_CAT	BMI_CAToverweight	1	0.423614	111	0.968538	0.621622	1.43492	0.355125	0.443814	0.800167
Gastrointestinal tract	X6_59371	BMI_CAT	BMI_CAToverweight	1	0.42453	111	0.877715	0.288288	1.43492	0.371283	0.464925	0.798587
Oral	X6_117494	OCPTN_ST	OCPTN_STTRUE	1	0.424925	77	0.667687	0.831169	1	0.514713	0.64508	0.797906
Gastrointestinal tract	X6_133942	BMI_CAT	BMI_CAToverweight	1	0.425135	111	0.709098	0.189189	1.43492	0.418926	0.52527	0.797545
Oral	X6_58175	EDLVL_BS	EDLVL_BSTRUE	1	0.425368	44	0.59435	0.136364	0.903424	-0.788967	0.989744	-0.797142
Gastrointestinal tract	X6_146554	DCMCODE_13	DCMCODE_13TRUE	1	0.425514	46	0.818534	0.76087	0.688113	0.904036	1.13445	0.796892
Gastrointestinal tract	X6_183641	MURICA	MURICATRUE	1	0.425672	111	0.825497	0.252252	0.500955	-0.532898	0.668949	-0.796619
Oral	X6_103412	BMI_CAT	BMI_CAToverweight	1	0.425866	379	0.97039	0.39314	1.38997	0.183467	0.230403	0.796286
Oral	X6_49238	BMI_CAT	BMI_CAToverweight	1	0.426178	379	0.720484	0.197889	1.38997	-0.233058	0.292879	-0.795749
Oral	X6_109231	MURICA	MURICATRUE	1	0.428802	379	0.984793	0.580475	0.512293	0.258958	0.32728	0.791244
Gastrointestinal tract	X6_138599	BMI_CAT	BMI_CATobese	1	0.429269	111	0.411615	0.0810811	1.43492	0.727926	0.920909	0.790443
Gastrointestinal tract	X6_67816	BMI_CAT	BMI_CATobese	1	0.429478	111	0.603031	0.144144	1.43492	0.601448	0.761245	0.790085
Oral	X6_205407	DCMCODE_13	DCMCODE_13TRUE	1	0.430235	80	0.985969	0.4	0.621261	0.506433	0.642039	0.788789
Gastrointestinal tract	X6_76152	BMI_CAT	BMI_CATobese	1	0.431152	111	0.500955	0.891892	1.43492	-0.735668	0.934512	-0.787222
Oral	X6_153831	DCMCODE_13	DCMCODE_13TRUE	1	0.431211	80	0.652195	0.1625	0.621261	-0.866062	1.10029	-0.787122
Oral	X6_85044	BMI_CAT	BMI_CATobese	1	0.431464	379	0.982252	0.414248	1.38997	-0.272643	0.34657	-0.78669
Oral	X6_174007	MURICA	MURICATRUE	1	0.432608	379	0.645352	0.163588	0.512293	-0.337504	0.430087	-0.784736
Oral	X6_99002	DCMCODE_13	DCMCODE_13TRUE	1	0.433164	80	0.652195	0.1625	0.621261	-0.857797	1.09442	-0.783789
Gastrointestinal tract	X6_111812	OCPTN_ST	OCPTN_STTRUE	1	0.433793	46	0.359673	0.934783	1	-1.02165	1.30526	-0.782717
Gastrointestinal tract	X6_137666	OCPTN_ST	OCPTN_STTRUE	1	0.433793	46	0.359673	0.934783	1	-1.02165	1.30526	-0.782717
Gastrointestinal tract	X6_81136	OCPTN_ST	OCPTN_STTRUE	1	0.433793	46	0.359673	0.0652174	1	1.02165	1.30526	0.782717
Gastrointestinal tract	X6_98921	DSUBFED	DSUBFED	1	0.434453	108	0.955631	0.361111	1.18299	-0.297969	0.381232	-0.781595
Gastrointestinal tract	X6_58645	BMI_CAT	BMI_CATobese	1	0.434763	111	0.554155	0.873874	1.43492	-0.598281	0.765979	-0.781068
Oral	X6_177609	OCPTN_ST	OCPTN_STTRUE	1	0.434869	77	0.993736	0.415584	1	0.376409	0.482027	0.780887
Oral	X6_84465	DSUBFED	DSUBFED	1	0.435194	365	0.684643	0.819178	1.31047	-0.17357	0.22243	-0.780335
Gastrointestinal tract	X7_53884	MURICA	MURICATRUE	1	0.436212	111	0.500955	0.891892	0.500955	0.666806	0.85641	0.778606
Oral	X6_188170	DSUDIET	DSUDIET	1	0.436587	365	0.850486	0.273973	0.222786	0.2444	0.314152	0.777969
Oral	X6_29169	MURICA	MURICATRUE	1	0.43712	379	0.963436	0.382586	0.512293	-0.259518	0.333972	-0.777066
Gastrointestinal tract	X6_202842	BMI_CAT	BMI_CATobese	1	0.438011	111	0.648049	0.837838	1.43492	0.639384	0.82442	0.775556
Oral	X6_60213	BMI_CAT	BMI_CATobese	1	0.438521	379	0.61324	0.150396	1.38997	0.328736	0.424344	0.774692
Oral	X6_197923	BMI_CAT	BMI_CATobese	1	0.438765	379	0.993235	0.440633	1.38997	-0.269299	0.347805	-0.77428
Airways	X6_56043	DSUBFED	DSUBFED	1	0.439585	88	0.32029	0.0568182	1.36952	0.70463	0.911678	0.772894
Oral	X6_173387	DSUBFED	DSUBFED	1	0.440056	365	0.790838	0.764384	1.31047	-0.157426	0.203894	-0.772099
Gastrointestinal tract	X6_65847	BMI_CAT	BMI_CAToverweight	1	0.44021	111	0.993454	0.423423	1.43492	-0.331368	0.429323	-0.771838
Airways	X6_62357	BMI_CAT	BMI_CAToverweight	1	0.440974	92	0.78728	0.228261	1.44118	-0.442871	0.574748	-0.770549
Oral	X6_177609	DCMCODE_13	DCMCODE_13TRUE	1	0.441343	80	0.985969	0.4	0.621261	0.485929	0.631136	0.769928
Gastrointestinal tract	X6_37664	DSUBFED	DSUBFED	1	0.442961	108	0.888339	0.703704	1.18299	0.306909	0.400036	0.767203
Oral	X6_54148	BMI_CAT	BMI_CAToverweight	1	0.4433	379	0.945268	0.358839	1.38997	-0.179637	0.234319	-0.766633
Oral	X6_85545	MURICA	MURICATRUE	1	0.443978	379	0.839601	0.266491	0.512293	-0.274514	0.358611	-0.765493
Airways	X6_103412	BMI_CAT	BMI_CAToverweight	1	0.44399	92	0.504173	0.108696	1.44118	-0.559674	0.731148	-0.765473
Oral	X6_36193	BMI_CAT	BMI_CATobese	1	0.44566	379	0.557688	0.129288	1.38997	-0.432588	0.567202	-0.762671
Gastrointestinal tract	X6_211583	DSUBFED	DSUBFED	1	0.445868	108	0.658986	0.833333	1.18299	0.36981	0.485111	0.762321
Gastrointestinal tract	X6_155466	DSUBFED	DSUBFED	1	0.445868	108	0.658986	0.166667	1.18299	-0.36981	0.485111	-0.762321
Oral	X6_37924	BMI_CAT	BMI_CAToverweight	1	0.446095	379	1	0.522427	1.38997	0.173439	0.227628	0.761942
Gastrointestinal tract	X6_77230	DCMCODE_13	DCMCODE_13TRUE	1	0.446411	46	0.359673	0.934783	0.688113	-0.994554	1.3062	-0.761411
Gastrointestinal tract	X6_137666	DCMCODE_13	DCMCODE_13TRUE	1	0.446411	46	0.359673	0.934783	0.688113	-0.994554	1.3062	-0.761411
Oral	X6_84465	BMI_CAT	BMI_CATobese	1	0.446661	379	0.675621	0.823219	1.38997	0.391852	0.514922	0.760993
Oral	X6_213963	DCMCODE_13	DCMCODE_13TRUE	1	0.446906	80	0.681438	0.175	0.621261	0.578653	0.760802	0.760583
Urogenital tract	X6_110798	BMI_CAT	BMI_CAToverweight	1	0.44703	64	0.829607	0.25	1.45931	-0.501481	0.659517	-0.760376
Oral	X6_91527	BMI_CAT	BMI_CATobese	1	0.447104	379	0.94961	0.364116	1.38997	0.262444	0.345207	0.760252
Gastrointestinal tract	X6_109965	DCMCODE_13	DCMCODE_13TRUE	1	0.447275	46	0.77935	0.217391	0.688113	-0.872909	1.14862	-0.759966
Oral	X6_154791	DSUDIET	DSUDIET	1	0.447592	365	0.958401	0.375342	0.222786	-0.25635	0.337553	-0.759436
Skin	X6_196036	DSUBFED	DSUBFED	1	0.447764	23	0.70964	0.173913	1.55818	0.656074	0.864225	0.759147
Skin	X6_213320	DSUBFED	DSUBFED	1	0.447764	23	0.70964	0.173913	1.55818	0.656074	0.864225	0.759147
Oral	X6_97267	OCPTN_ST	OCPTN_STTRUE	1	0.447864	77	0.799368	0.766234	1	-0.434814	0.572891	-0.758981
Oral	X6_153897	BMI_CAT	BMI_CAToverweight	1	0.4493	379	0.579152	0.862797	1.38997	0.255807	0.338109	0.756583
Gastrointestinal tract	X6_85013	BMI_CAT	BMI_CAToverweight	1	0.449494	111	1	0.468468	1.43492	0.320242	0.423456	0.756258
Gastrointestinal tract	X6_142856	DCMCODE_13	DCMCODE_13TRUE	1	0.452351	46	0.958712	0.652174	0.688113	0.678543	0.902917	0.751501
Oral	X6_213963	DSUDIET	DSUDIET	1	0.452595	365	0.702298	0.189041	0.222786	0.257757	0.343175	0.751096
Oral	X6_119756	DSUDIET	DSUDIET	1	0.453223	365	0.842644	0.268493	0.222786	-0.294028	0.39201	-0.750053
Oral	X6_90845	DCMCODE_13	DCMCODE_13TRUE	1	0.454736	80	0.681438	0.175	0.621261	0.560447	0.749719	0.747542
Oral	X6_144816	BMI_CAT	BMI_CAToverweight	1	0.454773	379	0.639081	0.16095	1.38997	-0.22729	0.304074	-0.747482
Oral	X6_60213	DSUDIET	DSUDIET	1	0.455975	365	0.600163	0.145205	0.222786	-0.393642	0.528031	-0.745491
Gastrointestinal tract	X6_95788	MURICA	MURICATRUE	1	0.456262	111	0.954704	0.63964	0.500955	-0.527277	0.707738	-0.745016
Urogenital tract	X6_56657	BMI_CAT	BMI_CAToverweight	1	0.456444	64	0.34554	0.0625	1.45931	0.965174	1.29603	0.744714
Skin	X6_141640	DSUBFED	DSUBFED	1	0.456682	23	0.937186	0.695652	1.55818	-0.684618	0.919788	-0.744322
Oral	X7_102617	BMI_CAT	BMI_CAToverweight	1	0.457108	379	0.991386	0.435356	1.38997	-0.168215	0.226212	-0.743618
Oral	X6_144884	DSUDIET	DSUDIET	1	0.457194	365	0.81778	0.747945	0.222786	-0.219812	0.295655	-0.743475
Oral	X6_109231	EDLVL_BS	EDLVL_BSTRUE	1	0.457275	44	0.987731	0.613636	0.903424	0.599788	0.80688	0.743342
Oral	X6_116723	EDLVL_BS	EDLVL_BSTRUE	1	0.457275	44	0.987731	0.386364	0.903424	-0.599788	0.80688	-0.743342
Oral	X6_36193	MURICA	MURICATRUE	1	0.457564	379	0.557688	0.129288	0.512293	-0.33242	0.447484	-0.742865
Gastrointestinal tract	X6_141836	DSUBFED	DSUBFED	1	0.457887	108	0.876369	0.287037	1.18299	0.297622	0.400929	0.742331
Oral	X6_142117	EDLVL_BS	EDLVL_BSTRUE	1	0.458419	44	0.930381	0.318182	0.903424	0.61247	0.826042	0.741452
Gastrointestinal tract	X6_63487	BMI_CAT	BMI_CAToverweight	1	0.458815	111	0.669225	0.171171	1.43492	-0.437385	0.590423	-0.740799
Oral	X6_123660	OCPTN_ST	OCPTN_STTRUE	1	0.45959	77	0.999975	0.441558	1	-0.354972	0.480001	-0.739523
Gastrointestinal tract	X6_109965	BMI_CAT	BMI_CATobese	1	0.460449	111	0.810899	0.243243	1.43492	0.467589	0.633498	0.738107
Gastrointestinal tract	X6_157953	BMI_CAT	BMI_CAToverweight	1	0.460531	111	0.954704	0.63964	1.43492	0.332232	0.450195	0.737973
Oral	X6_62025	DCMCODE_13	DCMCODE_13TRUE	1	0.460555	80	0.825981	0.75	0.621261	-0.534743	0.724649	-0.737933
Airways	X6_95142	DSUBFED	DSUBFED	1	0.460718	88	0.271564	0.0454545	1.36952	-0.7005	0.949619	-0.737664
Airways	X6_49947	BMI_CAT	BMI_CATobese	1	0.46114	92	0.210925	0.0326087	1.44118	1.09861	1.49071	0.736972
Airways	X6_154692	BMI_CAT	BMI_CATobese	1	0.46114	92	0.153772	0.0217391	1.44118	1.09861	1.49071	0.736972
Airways	X6_85444	BMI_CAT	BMI_CATobese	1	0.46114	92	0.153772	0.0217391	1.44118	1.09861	1.49071	0.736972
Gastrointestinal tract	X6_55806	BMI_CAT	BMI_CATobese	1	0.462386	111	0.998813	0.441441	1.43492	0.434159	0.590754	0.734924
Oral	X6_53818	OCPTN_ST	OCPTN_STTRUE	1	0.462853	77	0.879136	0.285714	1	0.387728	0.528127	0.734158
Gastrointestinal tract	X6_127818	BMI_CAT	BMI_CATobese	1	0.463138	111	0.993454	0.423423	1.43492	0.431281	0.587825	0.73369
Oral	X6_25433	BMI_CAT	BMI_CATobese	1	0.463304	379	0.997662	0.456464	1.38997	-0.252161	0.343816	-0.733418
Oral	X6_58645	DCMCODE_13	DCMCODE_13TRUE	1	0.463449	80	0.925647	0.675	0.621261	-0.470684	0.641976	-0.733179
Oral	X6_25433	OCPTN_ST	OCPTN_STTRUE	1	0.46349	77	1	0.532468	1	-0.348533	0.475416	-0.733112
Oral	X6_194344	EDLVL_BS	EDLVL_BSTRUE	1	0.463877	44	0.707067	0.818182	0.903424	-0.869704	1.18735	-0.732478
Oral	X6_205297	EDLVL_BS	EDLVL_BSTRUE	1	0.464272	44	1	0.454545	0.903424	0.582703	0.796226	0.731831
Oral	X6_85714	EDLVL_BS	EDLVL_BSTRUE	1	0.464272	44	1	0.454545	0.903424	0.582703	0.796226	0.731831
Gastrointestinal tract	X6_213905	OCPTN_ST	OCPTN_STTRUE	1	0.464537	46	0.735986	0.195652	1	0.566418	0.774433	0.731397
Oral	X6_210706	DCMCODE_13	DCMCODE_13TRUE	1	0.464584	80	0.681438	0.825	0.621261	-0.547279	0.748344	-0.73132
Oral	X6_39471	DCMCODE_13	DCMCODE_13TRUE	1	0.464584	80	0.681438	0.825	0.621261	-0.547279	0.748344	-0.73132
Oral	X6_173387	DCMCODE_13	DCMCODE_13TRUE	1	0.464584	80	0.681438	0.825	0.621261	-0.547279	0.748344	-0.73132
Gastrointestinal tract	X6_85013	OCPTN_ST	OCPTN_STTRUE	1	0.465061	46	1	0.456522	1	-0.455993	0.624188	-0.730538
Oral	X7_21650	OCPTN_ST	OCPTN_STTRUE	1	0.46582	77	0.751314	0.207792	1	0.434422	0.595673	0.729296
Gastrointestinal tract	X6_140225	MURICA	MURICATRUE	1	0.465886	111	0.500955	0.891892	0.500955	0.618661	0.848423	0.729189
Oral	X6_128085	OCPTN_ST	OCPTN_STTRUE	1	0.466176	77	1	0.506494	1	-0.3529	0.484277	-0.728716
Oral	X6_105925	DCMCODE_13	DCMCODE_13TRUE	1	0.466521	80	0.825981	0.25	0.621261	0.494823	0.679561	0.728152
Oral	X6_146554	DCMCODE_13	DCMCODE_13TRUE	1	0.466694	80	0.925647	0.675	0.621261	-0.46904	0.644403	-0.727868
Oral	X6_70847	BMI_CAT	BMI_CAToverweight	1	0.466725	379	0.850972	0.274406	1.38997	-0.187279	0.257316	-0.727817
Gastrointestinal tract	X6_130646	BMI_CAT	BMI_CATobese	1	0.467139	111	0.52813	0.117117	1.43492	-0.804259	1.10606	-0.727142
Oral	X6_105225	MURICA	MURICATRUE	1	0.467364	379	0.961591	0.379947	0.512293	0.251235	0.345686	0.726774
Gastrointestinal tract	X6_194344	MURICA	MURICATRUE	1	0.468062	111	0.839464	0.261261	0.500955	-0.485943	0.669679	-0.725636
Skin	X6_164274	DSUBFED	DSUBFED	1	0.469378	23	0.595609	0.869565	1.55818	-0.658756	0.910524	-0.723491
Oral	X6_109231	DSUBFED	DSUBFED	1	0.469624	365	0.988392	0.572603	1.31047	-0.128654	0.177922	-0.723091
Oral	X6_118674	BMI_CAT	BMI_CAToverweight	1	0.470119	379	0.843442	0.269129	1.38997	-0.185761	0.257185	-0.722285
Gastrointestinal tract	X6_76246	OCPTN_ST	OCPTN_STTRUE	1	0.470764	46	0.440556	0.913043	1	-0.817611	1.13362	-0.721237
Oral	X6_30161	DSUBFED	DSUBFED	1	0.471488	365	0.977787	0.405479	1.31047	0.130262	0.180904	0.72006
Oral	X6_104618	DSUBFED	DSUBFED	1	0.47151	365	0.999723	0.531507	1.31047	-0.126891	0.176231	-0.720024
Oral	X6_202842	BMI_CAT	BMI_CAToverweight	1	0.471595	379	0.725799	0.799472	1.38997	-0.199955	0.277759	-0.719886
Gastrointestinal tract	X6_195565	BMI_CAT	BMI_CAToverweight	1	0.472858	111	0.810899	0.756757	1.43492	0.356587	0.496752	0.717837
Gastrointestinal tract	X6_123414	DCMCODE_13	DCMCODE_13TRUE	1	0.473121	46	1	0.5	0.688113	0.577189	0.804546	0.71741
Oral	X6_66152	DSUBFED	DSUBFED	1	0.473736	365	0.908553	0.679452	1.31047	-0.133669	0.18658	-0.716414
Oral	X6_97267	DCMCODE_13	DCMCODE_13TRUE	1	0.473998	80	0.825981	0.75	0.621261	-0.490576	0.685172	-0.71599
Oral	X6_39471	BMI_CAT	BMI_CAToverweight	1	0.475815	379	0.756388	0.783641	1.38997	-0.192534	0.270014	-0.71305
Airways	X6_202994	DSUBFED	DSUBFED	1	0.475825	88	0.218415	0.0340909	1.36952	-0.731812	1.02634	-0.713034
Gastrointestinal tract	X6_95094	BMI_CAT	BMI_CAToverweight	1	0.479056	111	0.442807	0.90991	1.43492	-0.47444	0.670281	-0.707822
Gastrointestinal tract	X6_194092	DSUBFED	DSUBFED	1	0.479577	108	0.990908	0.583333	1.18299	0.264271	0.373801	0.706983
Oral	X6_64207	EDLVL_BS	EDLVL_BSTRUE	1	0.479656	44	0.83777	0.75	0.903424	-0.626238	0.885948	-0.706857
Skin	X6_49238	DSUBFED	DSUBFED	1	0.480572	23	1	0.434783	1.55818	0.57906	0.820916	0.705383
Gastrointestinal tract	X6_199642	BMI_CAT	BMI_CAToverweight	1	0.480835	111	0.554155	0.126126	1.43492	0.479684	0.680442	0.70496
Airways	X6_164274	BMI_CAT	BMI_CAToverweight	1	0.481799	92	0.469748	0.0978261	1.44118	-0.625468	0.88919	-0.703413
Gastrointestinal tract	X6_77027	DSUBFED	DSUBFED	1	0.482805	108	0.994602	0.425926	1.18299	0.258813	0.368786	0.701799
Gastrointestinal tract	X6_94538	DCMCODE_13	DCMCODE_13TRUE	1	0.482971	46	1	0.456522	0.688113	-0.587787	0.837861	-0.701532
Oral	X6_158611	BMI_CAT	BMI_CAToverweight	1	0.482996	379	0.586135	0.139842	1.38997	0.226648	0.323094	0.701493
Gastrointestinal tract	X6_90240	BMI_CAT	BMI_CAToverweight	1	0.483045	111	0.968538	0.621622	1.43492	0.305388	0.43539	0.701413
Urogenital tract	X6_107271	BMI_CAT	BMI_CAToverweight	1	0.483135	64	0.279733	0.046875	1.45931	0.911389	1.29963	0.70127
Oral	X6_212883	DSUDIET	DSUDIET	1	0.483545	365	0.861838	0.282192	0.222786	-0.275585	0.39335	-0.700612
Oral	X6_72946	OCPTN_ST	OCPTN_STTRUE	1	0.483828	77	0.962146	0.636364	1	-0.345819	0.493915	-0.700158
Oral	X6_33024	BMI_CAT	BMI_CATobese	1	0.483857	379	0.65155	0.166227	1.38997	0.297434	0.424838	0.700112
Gastrointestinal tract	X6_158611	OCPTN_ST	OCPTN_STTRUE	1	0.483937	46	0.913278	0.695652	1	-0.470764	0.672534	-0.699985
Gastrointestinal tract	X6_71475	OCPTN_ST	OCPTN_STTRUE	1	0.483937	46	0.913278	0.695652	1	-0.470764	0.672534	-0.699985
Gastrointestinal tract	X6_107860	BMI_CAT	BMI_CATobese	1	0.48433	111	0.980219	0.396396	1.43492	-0.428661	0.612938	-0.699355
Airways	X6_52811	DSUBFED	DSUBFED	1	0.485041	88	0.519604	0.113636	1.36952	-0.466617	0.668298	-0.698218
Airways	X6_148764	DCMCODE_13	DCMCODE_13TRUE	1	0.485569	19	0.958712	0.315789	0.8916	0.847298	1.21499	0.697373
Airways	X6_213320	DCMCODE_13	DCMCODE_13TRUE	1	0.48557	19	0.799049	0.210526	0.8916	0.847298	1.21499	0.697373
Airways	X6_141640	DCMCODE_13	DCMCODE_13TRUE	1	0.48557	19	0.799049	0.210526	0.8916	0.847298	1.21499	0.697373
Oral	X6_146554	BMI_CAT	BMI_CATobese	1	0.485833	379	0.915484	0.672823	1.38997	-0.253889	0.364285	-0.696951
Gastrointestinal tract	X6_174427	DCMCODE_13	DCMCODE_13TRUE	1	0.486122	46	0.818534	0.23913	0.688113	-0.804326	1.15483	-0.696491
Airways	X6_107860	MURICA	MURICATRUE	1	0.486353	92	0.262466	0.0434783	0.504173	-0.86946	1.24901	-0.696121
Oral	X6_63870	MURICA	MURICATRUE	1	0.487678	379	0.966999	0.387863	0.512293	0.240914	0.347135	0.694007
Gastrointestinal tract	X6_208248	DCMCODE_13	DCMCODE_13TRUE	1	0.488567	46	0.77935	0.217391	0.688113	-0.789434	1.13983	-0.692589
Oral	X6_91953	MURICA	MURICATRUE	1	0.488849	379	0.626314	0.155673	0.512293	0.346322	0.500363	0.692141
Gastrointestinal tract	X6_92939	BMI_CAT	BMI_CAToverweight	1	0.489094	111	0.625998	0.153153	1.43492	-0.445375	0.643838	-0.69175
Oral	X6_64207	DSUDIET	DSUDIET	1	0.49019	365	0.846592	0.728767	0.222786	-0.203279	0.294604	-0.690006
Gastrointestinal tract	X6_122071	OCPTN_ST	OCPTN_STTRUE	1	0.490331	46	0.989588	0.391304	1	-0.442871	0.642046	-0.689782
Gastrointestinal tract	X6_183699	BMI_CAT	BMI_CAToverweight	1	0.490385	111	0.669225	0.171171	1.43492	0.375962	0.545112	0.689697
Urogenital tract	X6_165971	BMI_CAT	BMI_CATobese	1	0.490803	64	0.405114	0.078125	1.45931	0.943137	1.36879	0.689032
Gastrointestinal tract	X6_120400	DSUBFED	DSUBFED	1	0.490956	108	0.997509	0.564815	1.18299	-0.253307	0.367756	-0.688789
Oral	X6_197923	OCPTN_ST	OCPTN_STTRUE	1	0.491239	77	0.999975	0.558442	1	-0.328791	0.477659	-0.688339
Airways	X6_85714	DSUBFED	DSUBFED	1	0.491673	88	0.159384	0.0227273	1.36952	-0.785497	1.14229	-0.687651
Oral	X6_26486	DSUBFED	DSUBFED	1	0.491874	365	0.974677	0.6	1.31047	0.123484	0.179657	0.687332
Gastrointestinal tract	X6_144436	BMI_CAT	BMI_CAToverweight	1	0.492202	111	0.865561	0.279279	1.43492	0.312428	0.454896	0.686811
Oral	X6_103412	MURICA	MURICATRUE	1	0.492489	379	0.97039	0.39314	0.512293	-0.230193	0.335385	-0.686355
Airways	X6_90240	BMI_CAT	BMI_CATobese	1	0.493927	92	0.262466	0.0434783	1.44118	0.885755	1.29482	0.684076
Airways	X6_107860	BMI_CAT	BMI_CATobese	1	0.493927	92	0.262466	0.0434783	1.44118	0.885755	1.29482	0.684076
Gastrointestinal tract	X6_148554	MURICA	MURICATRUE	1	0.494114	111	0.500955	0.891892	0.500955	0.57812	0.845475	0.683781
Oral	X6_154692	DSUBFED	DSUBFED	1	0.496578	365	0.735714	0.794521	1.31047	-0.145944	0.21466	-0.679884
Airways	X6_165971	MURICA	MURICATRUE	1	0.49672	92	0.724589	0.195652	0.504173	-0.617316	0.908273	-0.679659
Oral	X6_62025	BMI_CAT	BMI_CAToverweight	1	0.496917	379	0.839601	0.733509	1.38997	0.173136	0.254855	0.679349
Oral	X6_58645	DSUBFED	DSUBFED	1	0.497906	365	0.896235	0.690411	1.31047	-0.127577	0.188225	-0.677789
Oral	X6_113953	OCPTN_ST	OCPTN_STTRUE	1	0.498218	77	0.636396	0.844156	1	-0.449887	0.664239	-0.677296
Gastrointestinal tract	X6_174007	DSUBFED	DSUBFED	1	0.49899	108	0.920655	0.324074	1.18299	0.264121	0.390665	0.67608
Gastrointestinal tract	X6_202734	DCMCODE_13	DCMCODE_13TRUE	1	0.499311	46	0.97611	0.630435	0.688113	0.602287	0.891519	0.675574
Oral	X6_158772	BMI_CAT	BMI_CATobese	1	0.499534	379	0.741369	0.791557	1.38997	-0.285883	0.423391	-0.675223
Oral	X6_113993	BMI_CAT	BMI_CAToverweight	1	0.500758	379	0.994903	0.44591	1.38997	-0.152216	0.226076	-0.673298
Oral	X6_210706	DSUDIET	DSUDIET	1	0.500947	365	0.838641	0.734247	0.222786	-0.198552	0.295025	-0.673
Gastrointestinal tract	X6_33238	MURICA	MURICATRUE	1	0.50189	111	0.625998	0.153153	0.500955	0.726173	1.08139	0.671519
Gastrointestinal tract	X7_125528	OCPTN_ST	OCPTN_STTRUE	1	0.502707	46	0.97611	0.369565	1	-0.435651	0.649996	-0.670236
Gastrointestinal tract	X6_202994	MURICA	MURICATRUE	1	0.503165	111	0.810899	0.756757	0.500955	-0.542468	0.810236	-0.669518
Gastrointestinal tract	X6_170154	MURICA	MURICATRUE	1	0.503554	111	0.52813	0.882883	0.500955	0.570889	0.853464	0.668908
Gastrointestinal tract	X6_73558	DSUBFED	DSUBFED	1	0.503847	108	0.969718	0.62037	1.18299	0.252219	0.37732	0.668449
Gastrointestinal tract	X6_71475	DSUBFED	DSUBFED	1	0.504328	108	0.920655	0.675926	1.18299	0.267127	0.400073	0.667696
Airways	X6_25913	DSUBFED	DSUBFED	1	0.50523	88	0.365449	0.0681818	1.36952	0.575917	0.864374	0.666283
Gastrointestinal tract	X6_65847	OCPTN_ST	OCPTN_STTRUE	1	0.505798	46	1	0.456522	1	0.423896	0.637059	0.665395
Gastrointestinal tract	X6_150369	OCPTN_ST	OCPTN_STTRUE	1	0.506415	46	0.512449	0.891304	1	0.667829	1.00512	0.664431
Oral	X6_30161	DSUDIET	DSUDIET	1	0.506564	365	0.977787	0.405479	0.222786	0.190675	0.287075	0.664198
Oral	X6_84465	BMI_CAT	BMI_CAToverweight	1	0.506614	379	0.675621	0.823219	1.38997	-0.188852	0.284364	-0.664119
Gastrointestinal tract	X6_203385	DSUBFED	DSUBFED	1	0.506757	108	0.791149	0.768519	1.18299	0.305174	0.459671	0.663896
Gastrointestinal tract	X6_44338	OCPTN_ST	OCPTN_STTRUE	1	0.508024	46	1	0.543478	1	-0.41318	0.624217	-0.661917
Skin	X6_144884	BMI_CAT	BMI_CATobese	1	0.508496	26	0.746234	0.192308	1.35031	-0.891516	1.34837	-0.661182
Skin	X7_53884	BMI_CAT	BMI_CATobese	1	0.508496	26	0.746234	0.192308	1.35031	-0.891516	1.34837	-0.661182
Gastrointestinal tract	X6_77027	BMI_CAT	BMI_CAToverweight	1	0.508881	111	0.989654	0.414414	1.43492	0.276948	0.419249	0.660581
Gastrointestinal tract	X6_120400	OCPTN_ST	OCPTN_STTRUE	1	0.509975	46	0.958712	0.652174	1	0.431948	0.655582	0.658877
Airways	X6_104327	BMI_CAT	BMI_CAToverweight	1	0.510206	92	0.309787	0.0543478	1.44118	-0.785517	1.19286	-0.658516
Airways	X6_61889	BMI_CAT	BMI_CAToverweight	1	0.510529	92	0.309787	0.0543478	1.44118	-0.776897	1.18067	-0.658014
Oral	X6_26486	MURICA	MURICATRUE	1	0.510531	379	0.975157	0.598945	0.512293	0.216899	0.329628	0.658011
Airways	X6_107271	BMI_CAT	BMI_CAToverweight	1	0.510546	92	0.262466	0.0434783	1.44118	-0.783383	1.19057	-0.657987
Oral	X6_135314	DSUDIET	DSUDIET	1	0.510629	365	0.795476	0.238356	0.222786	0.204198	0.310398	0.657858
Oral	X6_145806	DSUBFED	DSUBFED	1	0.511063	365	0.746312	0.789041	1.31047	-0.137991	0.209973	-0.657184
Urogenital tract	X6_122057	BMI_CAT	BMI_CAToverweight	1	0.511223	64	0.205676	0.03125	1.45931	0.980829	1.49304	0.656935
Urogenital tract	X6_61652	BMI_CAT	BMI_CATobese	1	0.511223	64	0.205676	0.03125	1.45931	0.980829	1.49304	0.656935
Urogenital tract	X6_97267	BMI_CAT	BMI_CATobese	1	0.511223	64	0.205676	0.03125	1.45931	0.980829	1.49304	0.656935
Oral	X6_113953	EDLVL_BS	EDLVL_BSTRUE	1	0.511679	44	0.59435	0.863636	0.903424	0.682569	1.04014	0.656226
Oral	X6_145806	EDLVL_BS	EDLVL_BSTRUE	1	0.511679	44	0.59435	0.863636	0.903424	0.682569	1.04014	0.656226
Airways	X6_65508	BMI_CAT	BMI_CATobese	1	0.512072	92	0.433354	0.0869565	1.44118	-0.760748	1.16036	-0.655615
Oral	X6_135880	MURICA	MURICATRUE	1	0.513224	379	0.632736	0.158311	0.512293	0.327689	0.501187	0.653826
Gastrointestinal tract	X6_107271	BMI_CAT	BMI_CATobese	1	0.513255	111	0.810899	0.756757	1.43492	-0.440105	0.673172	-0.653778
Oral	X7_123707	DSUBFED	DSUBFED	1	0.513299	365	0.886462	0.30137	1.31047	-0.127087	0.194409	-0.65371
Gastrointestinal tract	X6_31735	MURICA	MURICATRUE	1	0.515298	111	1	0.513514	0.500955	0.405041	0.622555	0.650611
Gastrointestinal tract	X6_91527	OCPTN_ST	OCPTN_STTRUE	1	0.515481	46	0.688113	0.173913	1	-0.606843	0.933136	-0.650327
Oral	X6_24722	EDLVL_BS	EDLVL_BSTRUE	1	0.51683	44	0.872595	0.727273	0.903424	0.528977	0.816022	0.648239
Gastrointestinal tract	X6_92939	MURICA	MURICATRUE	1	0.516991	111	0.625998	0.153153	0.500955	0.7024	1.08397	0.647991
Gastrointestinal tract	X6_116015	OCPTN_ST	OCPTN_STTRUE	1	0.51701	46	0.635305	0.152174	1	0.554669	0.856022	0.647961
Gastrointestinal tract	X6_33238	OCPTN_ST	OCPTN_STTRUE	1	0.51701	46	0.635305	0.152174	1	0.554669	0.856022	0.647961
Oral	X6_37924	DCMCODE_13	DCMCODE_13TRUE	1	0.517388	80	0.99205	0.5875	0.621261	0.446233	0.689294	0.647377
Gastrointestinal tract	X6_77230	BMI_CAT	BMI_CAToverweight	1	0.517743	111	0.554155	0.873874	1.43492	0.470161	0.72687	0.646829
Oral	X6_173132	BMI_CAT	BMI_CAToverweight	1	0.517879	379	0.715106	0.195251	1.38997	0.184429	0.285221	0.646618
Oral	X6_173132	DCMCODE_13	DCMCODE_13TRUE	1	0.518623	80	0.517054	0.1125	0.621261	0.564908	0.875189	0.64547
Airways	X6_153897	MURICA	MURICATRUE	1	0.520003	92	0.309787	0.0543478	0.504173	-0.789701	1.2275	-0.643341
Skin	X6_31735	BMI_CAT	BMI_CAToverweight	1	0.520264	26	0.546365	0.115385	1.35031	0.895882	1.39342	0.642939
Oral	X6_25913	BMI_CAT	BMI_CAToverweight	1	0.520314	379	0.692943	0.815303	1.38997	0.189356	0.294552	0.642862
Oral	X6_145806	OCPTN_ST	OCPTN_STTRUE	1	0.521167	77	0.490766	0.896104	1	-0.510489	0.795715	-0.641548
Oral	X6_120450	EDLVL_BS	EDLVL_BSTRUE	1	0.523204	44	1	0.477273	0.903424	-0.47327	0.741321	-0.638414
Gastrointestinal tract	X6_202994	BMI_CAT	BMI_CAToverweight	1	0.523449	111	0.810899	0.756757	1.43492	-0.313281	0.491006	-0.638038
Oral	X6_153897	OCPTN_ST	OCPTN_STTRUE	1	0.524014	77	0.353758	0.935065	1	0.616961	0.968283	0.63717
Gastrointestinal tract	X6_55806	DSUBFED	DSUBFED	1	0.524174	108	0.999433	0.444444	1.18299	0.236931	0.371992	0.636924
Airways	X6_49238	BMI_CAT	BMI_CATobese	1	0.524408	92	0.677345	0.173913	1.44118	-0.56218	0.883145	-0.636566
Gastrointestinal tract	X7_53884	BMI_CAT	BMI_CAToverweight	1	0.52472	111	0.500955	0.891892	1.43492	-0.473667	0.744657	-0.636087
Oral	X6_36135	EDLVL_BS	EDLVL_BSTRUE	1	0.525221	44	0.755304	0.204545	0.903424	-0.568743	0.895211	-0.635317
Oral	X6_76803	BMI_CAT	BMI_CAToverweight	1	0.525706	379	0.815455	0.25066	1.38997	-0.164186	0.258734	-0.634575
Gastrointestinal tract	X6_63487	DCMCODE_13	DCMCODE_13TRUE	1	0.526199	46	0.688113	0.173913	0.688113	0.593727	0.936745	0.633819
Skin	X6_26486	DSUBFED	DSUBFED	1	0.526442	23	0.595609	0.130435	1.55818	0.653907	1.0323	0.633447
Skin	X7_102617	DSUBFED	DSUBFED	1	0.526442	23	0.595609	0.130435	1.55818	0.653907	1.0323	0.633447
Skin	X6_107271	DSUBFED	DSUBFED	1	0.526442	23	0.595609	0.130435	1.55818	0.653907	1.0323	0.633447
Skin	X6_58645	DSUBFED	DSUBFED	1	0.526442	23	0.595609	0.130435	1.55818	0.653907	1.0323	0.633447
Skin	X6_85714	DSUBFED	DSUBFED	1	0.526442	23	0.595609	0.130435	1.55818	0.653907	1.0323	0.633447
Oral	X6_194344	DSUDIET	DSUDIET	1	0.526497	365	0.735714	0.794521	0.222786	0.248803	0.392829	0.633362
Gastrointestinal tract	X6_194092	DCMCODE_13	DCMCODE_13TRUE	1	0.526873	46	0.989588	0.608696	0.688113	-0.499079	0.7887	-0.632787
Skin	X6_90240	BMI_CAT	BMI_CAToverweight	1	0.527034	26	0.655157	0.153846	1.35031	0.966574	1.52808	0.63254
Oral	X6_184627	DCMCODE_13	DCMCODE_13TRUE	1	0.527897	80	0.805252	0.7625	0.621261	0.522918	0.828425	0.631219
Oral	X6_196036	BMI_CAT	BMI_CATobese	1	0.528015	379	0.968716	0.609499	1.38997	0.231455	0.366785	0.631039
Gastrointestinal tract	X6_100105	MURICA	MURICATRUE	1	0.528214	111	0.920609	0.675676	0.500955	-0.443856	0.703711	-0.630735
Oral	X6_63853	DCMCODE_13	DCMCODE_13TRUE	1	0.528654	80	0.938383	0.6625	0.621261	-0.403939	0.641109	-0.630063
Oral	X6_104115	DSUDIET	DSUDIET	1	0.528959	365	0.800055	0.241096	0.222786	-0.246887	0.392135	-0.629596
Gastrointestinal tract	X6_127818	MURICA	MURICATRUE	1	0.529021	111	0.993454	0.423423	0.500955	-0.388391	0.616982	-0.629501
Gastrointestinal tract	X6_196806	DSUBFED	DSUBFED	1	0.529133	108	0.836711	0.259259	1.18299	0.260961	0.414665	0.629329
Urogenital tract	X6_56043	BMI_CAT	BMI_CAToverweight	1	0.529421	64	0.34554	0.0625	1.45931	0.693513	1.10276	0.62889
Gastrointestinal tract	X6_116067	OCPTN_ST	OCPTN_STTRUE	1	0.530755	46	0.635305	0.847826	1	0.580644	0.926284	0.626853
Oral	X6_67816	BMI_CAT	BMI_CAToverweight	1	0.53122	379	0.923537	0.335092	1.38997	-0.147615	0.235752	-0.626145
Oral	X6_119756	DCMCODE_13	DCMCODE_13TRUE	1	0.531573	80	0.938383	0.3375	0.621261	0.400648	0.640415	0.625607
Oral	X6_208903	DSUBFED	DSUBFED	1	0.531865	365	0.893029	0.693151	1.31047	-0.119243	0.190739	-0.625161
Skin	X6_181184	BMI_CAT	BMI_CAToverweight	1	0.53305	26	1	0.461538	1.35031	-0.82691	1.32654	-0.623357
Oral	X6_39471	OCPTN_ST	OCPTN_STTRUE	1	0.533082	77	0.636396	0.844156	1	0.410436	0.658481	0.623308
Oral	X6_26906	DSUBFED	DSUBFED	1	0.533278	365	0.790838	0.764384	1.31047	0.127476	0.204614	0.62301
Oral	X6_208903	EDLVL_BS	EDLVL_BSTRUE	1	0.533351	44	0.903424	0.704545	0.903424	-0.519801	0.834487	-0.622899
Oral	X6_159261	EDLVL_BS	EDLVL_BSTRUE	1	0.533351	44	0.903424	0.295455	0.903424	0.519801	0.834487	0.622899
Oral	X6_108247	DSUBFED	DSUBFED	1	0.533982	365	0.585919	0.139726	1.31047	0.155021	0.249254	0.621939
Airways	X6_30143	OCPTN_ST	OCPTN_STTRUE	1	0.535278	19	0.958712	0.315789	1	-0.693147	1.11803	-0.61997
Airways	X6_62357	OCPTN_ST	OCPTN_STTRUE	1	0.535278	19	0.958712	0.315789	1	-0.693147	1.11803	-0.61997
Gastrointestinal tract	X6_88033	OCPTN_ST	OCPTN_STTRUE	1	0.535737	46	0.688113	0.173913	1	-0.515123	0.831821	-0.619272
Oral	X6_67816	DSUBFED	DSUBFED	1	0.536261	365	0.917267	0.328767	1.31047	0.116008	0.18757	0.618477
Gastrointestinal tract	X6_203385	BMI_CAT	BMI_CATobese	1	0.536516	111	0.795655	0.765766	1.43492	0.443961	0.718279	0.61809
Oral	X6_158772	MURICA	MURICATRUE	1	0.536825	379	0.741369	0.791557	0.512293	0.233687	0.378365	0.617621
Gastrointestinal tract	X6_117241	OCPTN_ST	OCPTN_STTRUE	1	0.536907	46	0.818534	0.23913	1	-0.455204	0.737176	-0.617496
Oral	X6_61889	OCPTN_ST	OCPTN_STTRUE	1	0.537547	77	0.861125	0.727273	1	-0.338741	0.549435	-0.616526
Oral	X6_58645	OCPTN_ST	OCPTN_STTRUE	1	0.538709	77	0.895917	0.701299	1	0.320019	0.520554	0.614767
Oral	X6_39457	DCMCODE_13	DCMCODE_13TRUE	1	0.538974	80	0.99205	0.5875	0.621261	0.40843	0.6648	0.614366
Oral	X6_122071	OCPTN_ST	OCPTN_STTRUE	1	0.539546	77	0.911497	0.311688	1	-0.313913	0.511677	-0.613499
Oral	X6_195894	BMI_CAT	BMI_CATobese	1	0.540134	379	0.923537	0.335092	1.38997	0.212987	0.34767	0.612611
Oral	X6_111258	BMI_CAT	BMI_CATobese	1	0.54068	379	0.915484	0.672823	1.38997	0.235416	0.384801	0.611785
Gastrointestinal tract	X6_105476	MURICA	MURICATRUE	1	0.541573	111	1	0.486486	0.500955	-0.383591	0.628388	-0.610436
Gastrointestinal tract	X6_85444	BMI_CAT	BMI_CATobese	1	0.542845	111	0.669225	0.828829	1.43492	0.681858	1.12052	0.608517
Gastrointestinal tract	X6_181184	BMI_CAT	BMI_CAToverweight	1	0.542913	111	0.669225	0.171171	1.43492	0.344246	0.56581	0.608413
Gastrointestinal tract	X6_55806	OCPTN_ST	OCPTN_STTRUE	1	0.543299	46	1	0.521739	1	0.382432	0.629174	0.607831
Oral	X6_149008	DCMCODE_13	DCMCODE_13TRUE	1	0.54345	80	0.99205	0.4125	0.621261	-0.401793	0.661273	-0.607605
Oral	X6_85545	DSUDIET	DSUDIET	1	0.544088	365	0.842644	0.268493	0.222786	0.18878	0.311189	0.606642
Oral	X6_153897	DSUDIET	DSUDIET	1	0.54425	365	0.517152	0.884932	0.222786	-0.242206	0.399417	-0.606399
Oral	X6_111258	DCMCODE_13	DCMCODE_13TRUE	1	0.544254	80	0.925647	0.675	0.621261	0.434749	0.716942	0.606393
Gastrointestinal tract	X6_107860	BMI_CAT	BMI_CAToverweight	1	0.544319	111	0.980219	0.396396	1.43492	-0.261594	0.431463	-0.606295
Oral	X6_117494	DSUBFED	DSUBFED	1	0.54449	365	0.786139	0.767123	1.31047	-0.125611	0.207266	-0.606038
Gastrointestinal tract	X6_195565	BMI_CAT	BMI_CATobese	1	0.545019	111	0.810899	0.756757	1.43492	0.431006	0.712124	0.60524
Gastrointestinal tract	X6_187059	BMI_CAT	BMI_CATobese	1	0.545246	111	0.76316	0.783784	1.43492	0.430691	0.712005	0.604899
Oral	X6_174007	OCPTN_ST	OCPTN_STTRUE	1	0.545269	77	0.751314	0.207792	1	-0.354155	0.58551	-0.604865
Oral	X6_62357	OCPTN_ST	OCPTN_STTRUE	1	0.545269	77	0.751314	0.207792	1	-0.354155	0.58551	-0.604865
Oral	X6_159261	MURICA	MURICATRUE	1	0.545988	379	0.751442	0.21372	0.512293	0.26529	0.43938	0.603783
Gastrointestinal tract	X6_119084	BMI_CAT	BMI_CAToverweight	1	0.546996	111	0.825497	0.252252	1.43492	-0.288793	0.47951	-0.602267
Gastrointestinal tract	X6_161782	BMI_CAT	BMI_CATobese	1	0.547375	111	0.669225	0.171171	1.43492	0.451709	0.750724	0.601698
Gastrointestinal tract	X6_157252	BMI_CAT	BMI_CAToverweight	1	0.547378	111	0.865561	0.720721	1.43492	0.28966	0.481408	0.601693
Gastrointestinal tract	X6_90887	DSUBFED	DSUBFED	1	0.547904	108	0.510338	0.111111	1.18299	-0.343612	0.571825	-0.600904
Oral	X6_104115	DCMCODE_13	DCMCODE_13TRUE	1	0.548017	80	0.925647	0.325	0.621261	-0.429293	0.714614	-0.600734
Oral	X6_72839	DCMCODE_13	DCMCODE_13TRUE	1	0.548017	80	0.925647	0.675	0.621261	0.429293	0.714614	0.600734
Gastrointestinal tract	X6_165403	BMI_CAT	BMI_CATobese	1	0.548317	111	0.76316	0.216216	1.43492	0.450369	0.75026	0.600284
Gastrointestinal tract	X6_195565	MURICA	MURICATRUE	1	0.548939	111	0.810899	0.756757	0.500955	-0.486608	0.811891	-0.599351
Oral	X7_123707	MURICA	MURICATRUE	1	0.54946	379	0.879089	0.295515	0.512293	-0.209303	0.349672	-0.59857
Oral	X6_127775	EDLVL_BS	EDLVL_BSTRUE	1	0.549551	44	0.65361	0.159091	0.903424	-0.561687	0.938598	-0.598432
Gastrointestinal tract	X6_107346	BMI_CAT	BMI_CAToverweight	1	0.549618	111	0.648049	0.837838	1.43492	0.329463	0.550634	0.598333
Oral	X6_93460	DCMCODE_13	DCMCODE_13TRUE	1	0.549884	80	0.925647	0.325	0.621261	-0.434336	0.726395	-0.597933
Oral	X6_149008	MURICA	MURICATRUE	1	0.550961	379	0.918214	0.329815	0.512293	0.215641	0.361619	0.596321
Gastrointestinal tract	X6_128368	BMI_CAT	BMI_CAToverweight	1	0.55109	111	0.669225	0.828829	1.43492	0.329599	0.552899	0.596128
Gastrointestinal tract	X6_122071	BMI_CAT	BMI_CATobese	1	0.55123	111	0.900289	0.306306	1.43492	-0.389883	0.654256	-0.595918
Oral	X6_190669	EDLVL_BS	EDLVL_BSTRUE	1	0.551269	44	0.65361	0.840909	0.903424	-0.717509	1.20416	-0.595859
Airways	X6_36135	BMI_CAT	BMI_CATobese	1	0.551484	92	0.469748	0.0978261	1.44118	-0.685936	1.15179	-0.595538
Gastrointestinal tract	X6_56522	BMI_CAT	BMI_CATobese	1	0.551619	111	0.442807	0.0900901	1.43492	0.554958	0.932176	0.595336
Oral	X6_91953	BMI_CAT	BMI_CAToverweight	1	0.551833	379	0.626314	0.155673	1.38997	-0.180844	0.303932	-0.595016
Gastrointestinal tract	X6_56347	BMI_CAT	BMI_CATobese	1	0.551942	111	0.727858	0.801802	1.43492	-0.445834	0.749486	-0.594853
Oral	X6_194344	DCMCODE_13	DCMCODE_13TRUE	1	0.552274	80	0.709088	0.8125	0.621261	-0.440561	0.741241	-0.594355
Oral	X6_156982	DCMCODE_13	DCMCODE_13TRUE	1	0.552543	80	0.709088	0.8125	0.621261	-0.444274	0.747993	-0.593954
Oral	X6_84465	DCMCODE_13	DCMCODE_13TRUE	1	0.552543	80	0.709088	0.8125	0.621261	-0.444274	0.747993	-0.593954
Gastrointestinal tract	X6_69531	BMI_CAT	BMI_CATobese	1	0.552627	111	0.920609	0.324324	1.43492	-0.421162	0.709231	-0.593828
Airways	X6_173132	MURICA	MURICATRUE	1	0.552838	92	0.353708	0.0652174	0.504173	-0.720315	1.21365	-0.593513
Airways	X6_125450	MURICA	MURICATRUE	1	0.552838	92	0.353708	0.0652174	0.504173	-0.720315	1.21365	-0.593513
Gastrointestinal tract	X6_72839	BMI_CAT	BMI_CAToverweight	1	0.55309	111	0.996554	0.567568	1.43492	0.249549	0.420729	0.593136
Gastrointestinal tract	X7_129304	BMI_CAT	BMI_CATobese	1	0.553522	111	0.825497	0.252252	1.43492	-0.420259	0.709309	-0.59249
Oral	X6_145806	DCMCODE_13	DCMCODE_13TRUE	1	0.553817	80	0.588521	0.8625	0.621261	0.653725	1.10417	0.59205
Gastrointestinal tract	X6_118862	DSUBFED	DSUBFED	1	0.554134	108	0.969718	0.62037	1.18299	-0.225978	0.381992	-0.591577
Oral	X6_37924	DSUBFED	DSUBFED	1	0.554747	365	0.999723	0.531507	1.31047	0.105942	0.179361	0.590663
Oral	X6_104115	EDLVL_BS	EDLVL_BSTRUE	1	0.55508	44	0.930381	0.318182	0.903424	0.479721	0.812859	0.590165
Gastrointestinal tract	X6_213905	BMI_CAT	BMI_CATobese	1	0.555628	111	0.709098	0.189189	1.43492	0.443113	0.751871	0.589348
Gastrointestinal tract	X6_138599	DSUBFED	DSUBFED	1	0.555892	108	0.386407	0.0740741	1.18299	-0.433709	0.736406	-0.588954
Gastrointestinal tract	X6_116067	MURICA	MURICATRUE	1	0.556955	111	0.795655	0.765766	0.500955	-0.476137	0.810624	-0.587371
Oral	X6_56668	BMI_CAT	BMI_CAToverweight	1	0.557593	379	0.984793	0.419525	1.38997	-0.133118	0.227	-0.58642
Skin	X6_153897	BMI_CAT	BMI_CATobese	1	0.558045	26	0.655157	0.153846	1.35031	-0.81093	1.38444	-0.585747
Gastrointestinal tract	X6_183998	BMI_CAT	BMI_CATobese	1	0.558302	111	0.579102	0.135135	1.43492	-0.650549	1.11136	-0.585366
Gastrointestinal tract	X6_61652	DSUBFED	DSUBFED	1	0.558347	108	0.419717	0.916667	1.18299	0.412545	0.704846	0.585299
Gastrointestinal tract	X6_210288	MURICA	MURICATRUE	1	0.558916	111	0.625998	0.153153	0.500955	0.646149	1.10556	0.584452
Oral	X6_92037	BMI_CAT	BMI_CAToverweight	1	0.560119	379	0.593034	0.85752	1.38997	0.18717	0.32123	0.582664
Oral	X6_53818	DSUDIET	DSUDIET	1	0.560194	365	0.634263	0.158904	0.222786	0.236886	0.406634	0.582553
Airways	X6_49238	DSUBFED	DSUBFED	1	0.560495	88	0.69556	0.181818	1.36952	-0.309328	0.531394	-0.582106
Gastrointestinal tract	X6_76803	MURICA	MURICATRUE	1	0.560611	111	0.779748	0.225225	0.500955	0.475289	0.81674	0.581934
Gastrointestinal tract	X6_202734	BMI_CAT	BMI_CATobese	1	0.561411	111	0.961888	0.630631	1.43492	0.356071	0.613126	0.580747
Gastrointestinal tract	X6_31735	BMI_CAT	BMI_CATobese	1	0.56157	111	1	0.513514	1.43492	0.338917	0.583826	0.580511
Oral	X6_144816	DCMCODE_13	DCMCODE_13TRUE	1	0.561632	80	0.588521	0.1375	0.621261	-0.638403	1.0999	-0.580419
Oral	X6_159048	DCMCODE_13	DCMCODE_13TRUE	1	0.561632	80	0.588521	0.1375	0.621261	-0.638403	1.0999	-0.580419
Gastrointestinal tract	X6_146554	BMI_CAT	BMI_CATobese	1	0.562334	111	0.852814	0.72973	1.43492	0.374967	0.64719	0.579378
Gastrointestinal tract	X6_89989	DCMCODE_13	DCMCODE_13TRUE	1	0.563084	46	0.998196	0.586957	0.688113	-0.455143	0.787081	-0.578267
Gastrointestinal tract	X6_96390	MURICA	MURICATRUE	1	0.563467	111	0.689564	0.18018	0.500955	-0.419287	0.725788	-0.577699
Gastrointestinal tract	X6_90240	BMI_CAT	BMI_CATobese	1	0.563883	111	0.968538	0.621622	1.43492	0.352991	0.61168	0.577084
Gastrointestinal tract	X6_210288	DCMCODE_13	DCMCODE_13TRUE	1	0.563971	46	0.77935	0.217391	0.688113	-0.666241	1.15476	-0.576953
Oral	X6_56668	BMI_CAT	BMI_CATobese	1	0.564717	379	0.984793	0.419525	1.38997	0.195951	0.340282	0.575849
Oral	X6_62357	MURICA	MURICATRUE	1	0.565141	379	0.61324	0.150396	0.512293	0.288403	0.501377	0.575222
Airways	X6_148764	BMI_CAT	BMI_CATobese	1	0.565398	92	0.924792	0.326087	1.44118	0.40434	0.703392	0.574843
Gastrointestinal tract	X6_76803	DCMCODE_13	DCMCODE_13TRUE	1	0.5659	46	0.885327	0.282609	0.688113	0.473438	0.824661	0.5741
Gastrointestinal tract	X7_132061	OCPTN_ST	OCPTN_STTRUE	1	0.565965	46	1	0.543478	1	0.356761	0.62153	0.574005
Oral	X6_63870	DSUBFED	DSUBFED	1	0.566665	365	0.973053	0.39726	1.31047	-0.104341	0.182105	-0.57297
Gastrointestinal tract	X6_31735	DSUBFED	DSUBFED	1	0.566854	108	1	0.509259	1.18299	-0.210053	0.366784	-0.57269
Oral	X6_159048	DSUDIET	DSUDIET	1	0.567008	365	0.548698	0.126027	0.222786	-0.303079	0.529429	-0.572463
Gastrointestinal tract	X6_183998	MURICA	MURICATRUE	1	0.567351	111	0.579102	0.135135	0.500955	0.621091	1.08591	0.571957
Skin	X6_36135	DSUBFED	DSUBFED	1	0.568202	23	0.999762	0.391304	1.55818	0.548408	0.960937	0.570701
Skin	X6_110798	BMI_CAT	BMI_CATobese	1	0.569294	26	0.655157	0.846154	1.35031	-0.856469	1.50497	-0.569092
Oral	X6_63870	BMI_CAT	BMI_CAToverweight	1	0.569482	379	0.966999	0.387863	1.38997	0.130119	0.228754	0.568815
Oral	X6_213360	DSUDIET	DSUDIET	1	0.570064	365	0.861838	0.282192	0.222786	0.17705	0.311731	0.567957
Oral	X6_154791	DSUBFED	DSUBFED	1	0.570183	365	0.958401	0.375342	1.31047	0.105478	0.185772	0.567782
Oral	X7_21650	DSUDIET	DSUDIET	1	0.570241	365	0.730315	0.20274	0.222786	-0.222991	0.3928	-0.567696
Oral	X6_154791	BMI_CAT	BMI_CATobese	1	0.571535	379	0.959702	0.377309	1.38997	-0.199106	0.351907	-0.565793
Oral	X6_159048	DSUBFED	DSUBFED	1	0.571692	365	0.548698	0.126027	1.31047	0.148301	0.262219	0.565562
Gastrointestinal tract	X6_121134	DCMCODE_13	DCMCODE_13TRUE	1	0.572423	46	0.958712	0.652174	0.688113	0.502716	0.890573	0.564487
Oral	X6_26759	MURICA	MURICATRUE	1	0.573171	379	0.936055	0.348285	0.512293	0.198899	0.353042	0.563387
Gastrointestinal tract	X6_150369	MURICA	MURICATRUE	1	0.573442	111	0.795655	0.765766	0.500955	-0.456405	0.810682	-0.562989
Oral	X6_104618	BMI_CAT	BMI_CAToverweight	1	0.573992	379	1	0.522427	1.38997	0.12508	0.22249	0.562181
Oral	X6_182765	MURICA	MURICATRUE	1	0.574456	379	0.839601	0.266491	0.512293	-0.208191	0.370777	-0.561501
Skin	X6_53818	BMI_CAT	BMI_CATobese	1	0.575854	26	0.935842	0.307692	1.35031	-0.724187	1.29446	-0.55945
Gastrointestinal tract	X6_77027	DCMCODE_13	DCMCODE_13TRUE	1	0.57619	46	1	0.456522	0.688113	-0.45108	0.807002	-0.558958
Oral	X6_184627	BMI_CAT	BMI_CATobese	1	0.576389	379	0.798289	0.759894	1.38997	-0.219371	0.392669	-0.558667
Skin	X6_103923	DSUBFED	DSUBFED	1	0.576881	23	0.878239	0.26087	1.55818	0.510174	0.914379	0.557946
Gastrointestinal tract	X6_49947	DSUBFED	DSUBFED	1	0.577346	108	0.481546	0.898148	1.18299	-0.321912	0.577663	-0.557266
Gastrointestinal tract	X7_66598	MURICA	MURICATRUE	1	0.577667	111	0.810899	0.756757	0.500955	-0.45639	0.819673	-0.556795
Oral	X6_159659	MURICA	MURICATRUE	1	0.577817	379	0.998718	0.538259	0.512293	-0.18427	0.331077	-0.556577
Oral	X6_209274	DSUDIET	DSUDIET	1	0.578297	365	0.896235	0.309589	0.222786	0.163239	0.293662	0.555874
Skin	X6_107346	BMI_CAT	BMI_CATobese	1	0.579023	26	0.746234	0.192308	1.35031	0.659871	1.18936	0.554812
Oral	X7_81985	DSUDIET	DSUDIET	1	0.579657	365	0.998533	0.460274	0.222786	-0.161979	0.292441	-0.553886
Oral	X6_63853	DSUBFED	DSUBFED	1	0.579787	365	0.914412	0.673973	1.31047	-0.103359	0.186671	-0.553695
Oral	X6_85545	OCPTN_ST	OCPTN_STTRUE	1	0.579884	77	0.911497	0.311688	1	0.284995	0.514846	0.553555
Oral	X6_209274	OCPTN_ST	OCPTN_STTRUE	1	0.579884	77	0.911497	0.311688	1	0.284995	0.514846	0.553555
Oral	X6_156982	BMI_CAT	BMI_CATobese	1	0.58151	379	0.751442	0.78628	1.38997	-0.233007	0.422742	-0.55118
Airways	X6_148764	DSUBFED	DSUBFED	1	0.581656	88	0.929008	0.329545	1.36952	-0.205684	0.373314	-0.550967
Gastrointestinal tract	X6_62357	DSUBFED	DSUBFED	1	0.581996	108	0.757272	0.787037	1.18299	-0.243944	0.443154	-0.550471
Oral	X6_135880	DSUDIET	DSUDIET	1	0.583816	365	0.620876	0.153425	0.222786	-0.290291	0.529903	-0.547819
Gastrointestinal tract	X6_131335	DCMCODE_13	DCMCODE_13TRUE	1	0.583935	46	0.688113	0.173913	0.688113	0.514304	0.939117	0.547646
Gastrointestinal tract	X6_161782	DCMCODE_13	DCMCODE_13TRUE	1	0.584537	46	0.688113	0.173913	0.688113	-0.644156	1.17811	-0.54677
Urogenital tract	X6_161782	BMI_CAT	BMI_CAToverweight	1	0.585114	64	0.556422	0.125	1.45931	0.460357	0.843254	0.545929
Oral	X6_37895	OCPTN_ST	OCPTN_STTRUE	1	0.585608	77	1	0.454545	1	-0.260745	0.478244	-0.545212
Airways	X6_53818	BMI_CAT	BMI_CATobese	1	0.586256	92	0.567788	0.130435	1.44118	-0.622919	1.14451	-0.544269
Gastrointestinal tract	X6_194344	BMI_CAT	BMI_CAToverweight	1	0.586375	111	0.839464	0.261261	1.43492	0.260281	0.478374	0.544096
Oral	X6_105225	DSUBFED	DSUBFED	1	0.58653	365	0.949959	0.364384	1.31047	-0.100357	0.184523	-0.543872
Gastrointestinal tract	X6_110310	DSUBFED	DSUBFED	1	0.588542	108	1	0.453704	1.18299	0.19904	0.367945	0.54095
Gastrointestinal tract	X6_187059	DSUBFED	DSUBFED	1	0.589041	108	0.757272	0.787037	1.18299	0.2481	0.459252	0.540227
Oral	X6_90845	DSUBFED	DSUBFED	1	0.58918	365	0.678612	0.178082	1.31047	0.128766	0.238444	0.540025
Skin	X6_105225	DSUBFED	DSUBFED	1	0.590268	23	0.455195	0.0869565	1.55818	0.847298	1.57359	0.538448
Skin	X6_118862	DSUBFED	DSUBFED	1	0.590268	23	0.455195	0.0869565	1.55818	0.847298	1.57359	0.538448
Skin	X6_145806	DSUBFED	DSUBFED	1	0.590268	23	0.455195	0.0869565	1.55818	0.847298	1.57359	0.538448
Skin	X6_149008	DSUBFED	DSUBFED	1	0.590268	23	0.455195	0.0869565	1.55818	0.847298	1.57359	0.538448
Skin	X6_184627	DSUBFED	DSUBFED	1	0.590268	23	0.455195	0.0869565	1.55818	0.847298	1.57359	0.538448
Skin	X6_196633	DSUBFED	DSUBFED	1	0.590268	23	0.455195	0.0869565	1.55818	0.847298	1.57359	0.538448
Skin	X6_199978	DSUBFED	DSUBFED	1	0.590268	23	0.455195	0.0869565	1.55818	0.847298	1.57359	0.538448
Skin	X6_202842	DSUBFED	DSUBFED	1	0.590268	23	0.455195	0.0869565	1.55818	0.847298	1.57359	0.538448
Skin	X6_205407	DSUBFED	DSUBFED	1	0.590268	23	0.455195	0.0869565	1.55818	0.847298	1.57359	0.538448
Skin	X6_29169	DSUBFED	DSUBFED	1	0.590268	23	0.455195	0.0869565	1.55818	0.847298	1.57359	0.538448
Skin	X6_36193	DSUBFED	DSUBFED	1	0.590268	23	0.455195	0.0869565	1.55818	0.847298	1.57359	0.538448
Skin	X6_37895	DSUBFED	DSUBFED	1	0.590268	23	0.455195	0.0869565	1.55818	0.847298	1.57359	0.538448
Skin	X6_63853	DSUBFED	DSUBFED	1	0.590268	23	0.455195	0.0869565	1.55818	0.847298	1.57359	0.538448
Skin	X6_64207	DSUBFED	DSUBFED	1	0.590268	23	0.455195	0.0869565	1.55818	0.847298	1.57359	0.538448
Skin	X6_69184	DSUBFED	DSUBFED	1	0.590268	23	0.455195	0.0869565	1.55818	0.847298	1.57359	0.538448
Skin	X6_90097	DSUBFED	DSUBFED	1	0.590268	23	0.455195	0.0869565	1.55818	0.847298	1.57359	0.538448
Skin	X6_90481	DSUBFED	DSUBFED	1	0.590268	23	0.455195	0.0869565	1.55818	0.847298	1.57359	0.538448
Gastrointestinal tract	X6_114478	BMI_CAT	BMI_CAToverweight	1	0.591093	111	0.625998	0.153153	1.43492	-0.318365	0.59258	-0.537252
Oral	X6_173387	MURICA	MURICATRUE	1	0.59129	379	0.79386	0.762533	0.512293	0.196668	0.366257	0.536968
Oral	X6_205297	DSUDIET	DSUDIET	1	0.592143	365	0.983458	0.416438	0.222786	-0.16535	0.308642	-0.535732
Oral	X7_123707	BMI_CAT	BMI_CATobese	1	0.592369	379	0.879089	0.295515	1.38997	0.19177	0.358177	0.535406
Oral	X6_144884	DSUBFED	DSUBFED	1	0.594264	365	0.81778	0.747945	1.31047	-0.105686	0.198409	-0.532667
Oral	X6_61652	MURICA	MURICATRUE	1	0.595104	379	0.984793	0.419525	0.512293	-0.175499	0.330224	-0.531454
Oral	X6_57018	BMI_CAT	BMI_CATobese	1	0.596082	379	0.898134	0.688654	1.38997	-0.203306	0.383566	-0.530043
Oral	X6_194344	DSUBFED	DSUBFED	1	0.597323	365	0.735714	0.794521	1.31047	-0.112797	0.213527	-0.528254
Airways	X6_177585	BMI_CAT	BMI_CAToverweight	1	0.599013	92	0.469748	0.902174	1.44118	0.395865	0.752852	0.52582
Airways	X6_47906	BMI_CAT	BMI_CATobese	1	0.59908	92	0.262466	0.0434783	1.44118	0.674669	1.28331	0.525723
Airways	X6_95142	BMI_CAT	BMI_CATobese	1	0.59908	92	0.262466	0.0434783	1.44118	0.674669	1.28331	0.525723
Oral	X6_125450	OCPTN_ST	OCPTN_STTRUE	1	0.599476	77	0.697205	0.818182	1	0.324649	0.618198	0.525154
Airways	X6_36135	DCMCODE_13	DCMCODE_13TRUE	1	0.600299	19	0.799049	0.210526	0.8916	-0.693147	1.32288	-0.52397
Oral	X6_76803	OCPTN_ST	OCPTN_STTRUE	1	0.600488	77	0.799368	0.233766	1	-0.293776	0.560964	-0.523699
Gastrointestinal tract	X6_157252	MURICA	MURICATRUE	1	0.600788	111	0.865561	0.720721	0.500955	0.345347	0.659982	0.523268
Oral	X6_93518	DSUDIET	DSUDIET	1	0.601283	365	0.684643	0.180822	0.222786	0.177777	0.340205	0.522556
Oral	X6_93460	OCPTN_ST	OCPTN_STTRUE	1	0.602228	77	0.939133	0.337662	1	0.263289	0.50516	0.521199
Gastrointestinal tract	X6_58645	MURICA	MURICATRUE	1	0.602826	111	0.554155	0.873874	0.500955	0.438103	0.841954	0.52034
Gastrointestinal tract	X6_150972	MURICA	MURICATRUE	1	0.602826	111	0.554155	0.873874	0.500955	0.438103	0.841954	0.52034
Oral	X6_149008	DSUBFED	DSUBFED	1	0.60334	365	0.928195	0.339726	1.31047	0.0974029	0.187456	0.519603
Oral	X6_66152	DCMCODE_13	DCMCODE_13TRUE	1	0.60354	80	0.950055	0.65	0.621261	-0.333923	0.643004	-0.519316
Oral	X6_158772	DSUDIET	DSUDIET	1	0.603871	365	0.751513	0.786301	0.222786	-0.161533	0.311333	-0.518842
Gastrointestinal tract	X6_67816	BMI_CAT	BMI_CAToverweight	1	0.604225	111	0.603031	0.144144	1.43492	0.311227	0.600438	0.518334
Oral	X6_70847	DCMCODE_13	DCMCODE_13TRUE	1	0.6043	80	0.78325	0.225	0.621261	-0.430356	0.830439	-0.518227
Oral	X7_81985	OCPTN_ST	OCPTN_STTRUE	1	0.604462	77	0.993736	0.415584	1	-0.248799	0.480312	-0.517995
Oral	X6_72839	DSUBFED	DSUBFED	1	0.605115	365	0.971383	0.605479	1.31047	0.0929735	0.179812	0.517059
Gastrointestinal tract	X6_155466	BMI_CAT	BMI_CAToverweight	1	0.606069	111	0.648049	0.162162	1.43492	0.310494	0.602091	0.515693
Oral	X6_144765	BMI_CAT	BMI_CATobese	1	0.60614	379	0.994092	0.443272	1.38997	0.174841	0.339108	0.515591
Airways	X6_148764	OCPTN_ST	OCPTN_STTRUE	1	0.606508	19	0.958712	0.315789	1	-0.533042	1.0349	-0.515065
Gastrointestinal tract	X6_155466	OCPTN_ST	OCPTN_STTRUE	1	0.606543	46	0.577004	0.130435	1	0.473604	0.919595	0.515014
Gastrointestinal tract	X6_187059	OCPTN_ST	OCPTN_STTRUE	1	0.606543	46	0.577004	0.869565	1	-0.473604	0.919595	-0.515014
Oral	X6_173979	OCPTN_ST	OCPTN_STTRUE	1	0.607708	77	0.987808	0.402597	1	-0.248695	0.484457	-0.513348
Gastrointestinal tract	X6_131335	BMI_CAT	BMI_CATobese	1	0.608363	111	0.745871	0.207207	1.43492	-0.426185	0.831724	-0.512412
Oral	X6_92037	DSUDIET	DSUDIET	1	0.60841	365	0.607153	0.852055	0.222786	-0.175225	0.342007	-0.512344
Gastrointestinal tract	X6_147771	MURICA	MURICATRUE	1	0.608835	111	0.727858	0.198198	0.500955	-0.36687	0.716911	-0.511737
Gastrointestinal tract	X6_113649	DSUBFED	DSUBFED	1	0.609698	108	0.876369	0.712963	1.18299	0.215827	0.422773	0.510504
Gastrointestinal tract	X6_153601	OCPTN_ST	OCPTN_STTRUE	1	0.610788	46	0.937734	0.326087	1	0.337954	0.664024	0.508949
Oral	X6_205297	DCMCODE_13	DCMCODE_13TRUE	1	0.611128	80	0.985969	0.4	0.621261	-0.335707	0.660238	-0.508465
Oral	X6_109255	EDLVL_BS	EDLVL_BSTRUE	1	0.612105	44	0.707067	0.181818	0.903424	0.499456	0.984982	0.507071
Oral	X6_139150	BMI_CAT	BMI_CATobese	1	0.612156	379	0.984793	0.580475	1.38997	0.179241	0.353534	0.506998
Urogenital tract	X6_26486	BMI_CAT	BMI_CAToverweight	1	0.61246	64	0.279733	0.046875	1.45931	-0.655681	1.29437	-0.506565
Urogenital tract	X6_62357	DSUBFED	DSUBFED	1	0.613492	64	0.509889	0.109375	1.19836	0.46672	0.924024	0.505095
Oral	X6_205297	BMI_CAT	BMI_CATobese	1	0.613845	379	0.982252	0.414248	1.38997	-0.175316	0.347441	-0.504592
Gastrointestinal tract	X6_107346	DSUBFED	DSUBFED	1	0.614006	108	0.658986	0.833333	1.18299	0.248207	0.492118	0.504364
Oral	X6_212883	OCPTN_ST	OCPTN_STTRUE	1	0.614302	77	0.951215	0.350649	1	0.25033	0.496743	0.503942
Skin	X6_141640	BMI_CAT	BMI_CAToverweight	1	0.615061	26	0.885327	0.730769	1.35031	0.693147	1.3784	0.502862
Oral	X6_53818	DCMCODE_13	DCMCODE_13TRUE	1	0.615247	80	0.863784	0.275	0.621261	0.340687	0.677852	0.502597
Skin	X6_127818	BMI_CAT	BMI_CATobese	1	0.615383	26	0.9738	0.346154	1.35031	-0.575459	1.14541	-0.502404
Oral	X6_128749	BMI_CAT	BMI_CATobese	1	0.615395	379	0.912708	0.675462	1.38997	0.188128	0.374469	0.502387
Oral	X6_53818	DSUBFED	DSUBFED	1	0.61568	365	0.634263	0.158904	1.31047	-0.134335	0.267609	-0.501983
Gastrointestinal tract	X6_57750	OCPTN_ST	OCPTN_STTRUE	1	0.615951	46	1	0.543478	1	-0.310155	0.618335	-0.501597
Oral	X6_105925	EDLVL_BS	EDLVL_BSTRUE	1	0.616117	44	0.872595	0.272727	0.903424	0.423485	0.844672	0.501361
Oral	X6_85545	BMI_CAT	BMI_CATobese	1	0.616305	379	0.839601	0.266491	1.38997	-0.200286	0.399696	-0.501094
Airways	X6_110798	BMI_CAT	BMI_CATobese	1	0.617059	92	0.998364	0.434783	1.44118	-0.329975	0.659921	-0.500022
Gastrointestinal tract	X6_73558	BMI_CAT	BMI_CAToverweight	1	0.617406	111	0.961888	0.630631	1.43492	-0.215868	0.432143	-0.499529
Airways	X6_107860	DSUBFED	DSUBFED	1	0.617521	88	0.271564	0.0454545	1.36952	-0.406991	0.815016	-0.499366
Oral	X7_81985	BMI_CAT	BMI_CATobese	1	0.617589	379	0.994092	0.443272	1.38997	-0.174341	0.349192	-0.49927
Gastrointestinal tract	X6_37664	BMI_CAT	BMI_CAToverweight	1	0.617591	111	0.877715	0.711712	1.43492	0.232296	0.465275	0.499267
Gastrointestinal tract	X6_153601	DSUBFED	DSUBFED	1	0.617937	108	0.888339	0.296296	1.18299	0.196747	0.39446	0.498776
Gastrointestinal tract	X6_130646	MURICA	MURICATRUE	1	0.618026	111	0.52813	0.117117	0.500955	-0.420664	0.843606	-0.49865
Gastrointestinal tract	X6_149327	MURICA	MURICATRUE	1	0.618026	111	0.52813	0.882883	0.500955	0.420664	0.843606	0.49865
Oral	X6_127775	BMI_CAT	BMI_CATobese	1	0.618751	379	0.56493	0.131926	1.38997	0.222181	0.446486	0.497621
Gastrointestinal tract	X6_98694	MURICA	MURICATRUE	1	0.61942	111	0.709098	0.189189	0.500955	-0.358334	0.721469	-0.496673
Oral	X6_123660	DSUBFED	DSUBFED	1	0.619475	365	0.999929	0.471233	1.31047	-0.088244	0.177698	-0.496594
Oral	X6_24671	MURICA	MURICATRUE	1	0.619642	379	0.933641	0.345646	0.512293	0.175452	0.353479	0.496357
Gastrointestinal tract	X6_183641	OCPTN_ST	OCPTN_STTRUE	1	0.619818	46	0.937734	0.326087	1	0.332079	0.669368	0.496108
Gastrointestinal tract	X6_203385	MURICA	MURICATRUE	1	0.621062	111	0.795655	0.765766	0.500955	-0.404918	0.8191	-0.494345
Gastrointestinal tract	X6_158611	MURICA	MURICATRUE	1	0.621665	111	0.865561	0.720721	0.500955	0.324018	0.656582	0.493492
Oral	X6_211583	BMI_CAT	BMI_CAToverweight	1	0.622058	379	0.978123	0.406332	1.38997	0.114159	0.23159	0.492935
Airways	X6_103923	DSUBFED	DSUBFED	1	0.622196	88	0.484419	0.102273	1.36952	-0.309195	0.627501	-0.492741
Gastrointestinal tract	X6_122057	BMI_CAT	BMI_CAToverweight	1	0.622314	111	0.961888	0.369369	1.43492	0.213324	0.43308	0.492574
Oral	X6_85714	DSUBFED	DSUBFED	1	0.622618	365	0.997987	0.457534	1.31047	0.0871329	0.177048	0.492143
Gastrointestinal tract	X6_67816	DSUBFED	DSUBFED	1	0.622632	108	0.613582	0.148148	1.18299	-0.251231	0.510505	-0.492123
Gastrointestinal tract	X7_132061	BMI_CAT	BMI_CATobese	1	0.622687	111	0.999951	0.54955	1.43492	-0.286899	0.583073	-0.492046
Gastrointestinal tract	X6_92939	DCMCODE_13	DCMCODE_13TRUE	1	0.622761	46	0.440556	0.0869565	0.688113	0.612252	1.24457	0.491941
Gastrointestinal tract	X6_145397	OCPTN_ST	OCPTN_STTRUE	1	0.622825	46	1	0.521739	1	-0.307457	0.625102	-0.49185
Oral	X6_72839	BMI_CAT	BMI_CATobese	1	0.622979	379	0.966999	0.612137	1.38997	-0.171823	0.349494	-0.491633
Oral	X6_144816	BMI_CAT	BMI_CATobese	1	0.623134	379	0.639081	0.16095	1.38997	-0.236257	0.48077	-0.491413
Oral	X6_25913	DSUBFED	DSUBFED	1	0.62337	365	0.702298	0.810959	1.31047	-0.106552	0.216975	-0.49108
Oral	X6_153897	MURICA	MURICATRUE	1	0.623927	379	0.579152	0.862797	0.512293	0.218307	0.445258	0.490293
Oral	X6_113953	MURICA	MURICATRUE	1	0.624335	379	0.766103	0.778364	0.512293	-0.197288	0.402863	-0.489715
Oral	X6_39471	DSUBFED	DSUBFED	1	0.625369	365	0.751513	0.786301	1.31047	-0.10325	0.211466	-0.488255
Oral	X6_72839	BMI_CAT	BMI_CAToverweight	1	0.625772	379	0.966999	0.612137	1.38997	-0.111596	0.228826	-0.487687
Oral	X6_188170	OCPTN_ST	OCPTN_STTRUE	1	0.626137	77	0.939133	0.337662	1	-0.246892	0.506787	-0.487171
Gastrointestinal tract	X6_104618	DSUBFED	DSUBFED	1	0.626579	108	0.589412	0.861111	1.18299	0.253603	0.521228	0.486548
Oral	X6_135314	DCMCODE_13	DCMCODE_13TRUE	1	0.62661	80	0.863784	0.275	0.621261	0.327016	0.672175	0.486504
Oral	X6_153831	DSUBFED	DSUBFED	1	0.626897	365	0.713712	0.194521	1.31047	-0.110482	0.227283	-0.486098
Urogenital tract	X6_161782	MURICA	MURICATRUE	1	0.627619	64	0.556422	0.125	0.405114	-0.579429	1.1945	-0.48508
Oral	X6_184627	DSUBFED	DSUBFED	1	0.627679	365	0.813436	0.750685	1.31047	-0.0966687	0.199318	-0.484997
Oral	X6_29169	EDLVL_BS	EDLVL_BSTRUE	1	0.628287	44	1	0.454545	0.903424	-0.372178	0.768742	-0.484139
Gastrointestinal tract	X6_148529	OCPTN_ST	OCPTN_STTRUE	1	0.628697	46	0.818534	0.23913	1	0.358294	0.740947	0.483562
Gastrointestinal tract	X6_118862	BMI_CAT	BMI_CATobese	1	0.629478	111	0.968538	0.621622	1.43492	-0.283766	0.588163	-0.482462
Oral	X6_60213	DCMCODE_13	DCMCODE_13TRUE	1	0.629998	80	0.55384	0.125	0.621261	-0.536031	1.11272	-0.48173
Oral	X6_30161	MURICA	MURICATRUE	1	0.630335	379	0.973611	0.398417	0.512293	-0.159797	0.332041	-0.481256
Gastrointestinal tract	X6_130646	BMI_CAT	BMI_CAToverweight	1	0.630844	111	0.52813	0.117117	1.43492	-0.314413	0.654292	-0.48054
Oral	X6_153831	BMI_CAT	BMI_CATobese	1	0.631694	379	0.715106	0.195251	1.38997	0.188081	0.392372	0.479345
Oral	X6_174007	DSUDIET	DSUDIET	1	0.632837	365	0.647325	0.164384	0.222786	-0.25447	0.532655	-0.477738
Oral	X6_56043	DCMCODE_13	DCMCODE_13TRUE	1	0.634598	80	0.735226	0.8	0.621261	-0.350481	0.737445	-0.475265
Gastrointestinal tract	X6_202734	DSUBFED	DSUBFED	1	0.63464	108	0.94774	0.648148	1.18299	-0.186263	0.391962	-0.475207
Oral	X6_36135	DSUBFED	DSUBFED	1	0.634991	365	0.614057	0.150685	1.31047	-0.138038	0.290781	-0.474714
Oral	X6_53818	BMI_CAT	BMI_CATobese	1	0.635111	379	0.626314	0.155673	1.38997	-0.234233	0.493594	-0.474546
Oral	X6_33024	DCMCODE_13	DCMCODE_13TRUE	1	0.636106	80	0.55384	0.125	0.621261	-0.523162	1.1057	-0.47315
Gastrointestinal tract	X6_120450	DSUBFED	DSUBFED	1	0.636131	108	0.45138	0.0925926	1.18299	0.287202	0.607044	0.473116
Oral	X6_212883	DSUBFED	DSUBFED	1	0.637707	365	0.861838	0.282192	1.31047	0.095546	0.202898	0.470908
Gastrointestinal tract	X6_144436	DCMCODE_13	DCMCODE_13TRUE	1	0.638052	46	0.913278	0.304348	0.688113	-0.425285	0.904047	-0.470423
Oral	X6_85714	DCMCODE_13	DCMCODE_13TRUE	1	0.638115	80	0.999538	0.4375	0.621261	0.295193	0.627621	0.470336
Gastrointestinal tract	X6_41475	BMI_CAT	BMI_CATobese	1	0.638236	111	1	0.531532	1.43492	0.279347	0.594145	0.470167
Oral	X6_146554	EDLVL_BS	EDLVL_BSTRUE	1	0.638599	44	0.798759	0.772727	0.903424	0.412555	0.878414	0.469659
Oral	X6_56043	EDLVL_BS	EDLVL_BSTRUE	1	0.638599	44	0.798759	0.772727	0.903424	0.412555	0.878414	0.469659
Oral	X6_158611	OCPTN_ST	OCPTN_STTRUE	1	0.639787	77	0.667687	0.168831	1	0.299878	0.640769	0.467997
Oral	X6_84465	OCPTN_ST	OCPTN_STTRUE	1	0.639787	77	0.667687	0.831169	1	-0.299878	0.640769	-0.467997
Gastrointestinal tract	X6_205736	BMI_CAT	BMI_CATobese	1	0.640019	111	1	0.522523	1.43492	0.271565	0.580673	0.467672
Gastrointestinal tract	X6_70847	DCMCODE_13	DCMCODE_13TRUE	1	0.641077	46	0.688113	0.173913	0.688113	-0.540674	1.15976	-0.466193
Oral	X6_92037	DCMCODE_13	DCMCODE_13TRUE	1	0.641079	80	0.55384	0.875	0.621261	-0.413911	0.887857	-0.46619
Oral	X6_149008	BMI_CAT	BMI_CAToverweight	1	0.64133	379	0.918214	0.329815	1.38997	0.110824	0.237902	0.46584
Oral	X6_85714	OCPTN_ST	OCPTN_STTRUE	1	0.641545	77	0.999975	0.441558	1	-0.221915	0.476684	-0.46554
Oral	X6_155466	DSUBFED	DSUBFED	1	0.641721	365	0.653737	0.167123	1.31047	0.107325	0.23066	0.465294
Oral	X6_202842	DCMCODE_13	DCMCODE_13TRUE	1	0.641826	80	0.55384	0.875	0.621261	-0.405465	0.871693	-0.465147
Oral	X6_184628	DCMCODE_13	DCMCODE_13TRUE	1	0.642009	80	0.735226	0.2	0.621261	0.342031	0.735723	0.464891
Airways	X6_107346	BMI_CAT	BMI_CATobese	1	0.642956	92	0.309787	0.0543478	1.44118	0.594761	1.283	0.46357
Gastrointestinal tract	X6_98694	BMI_CAT	BMI_CAToverweight	1	0.643909	111	0.709098	0.189189	1.43492	0.245674	0.531486	0.46224
Gastrointestinal tract	X6_96390	BMI_CAT	BMI_CAToverweight	1	0.644184	111	0.689564	0.18018	1.43492	0.246191	0.533046	0.461856
Gastrointestinal tract	X6_184628	BMI_CAT	BMI_CATobese	1	0.645736	111	1	0.504505	1.43492	0.268792	0.58472	0.459694
Gastrointestinal tract	X6_121134	BMI_CAT	BMI_CATobese	1	0.645752	111	0.993454	0.576577	1.43492	0.271231	0.590054	0.459672
Oral	X6_54148	BMI_CAT	BMI_CATobese	1	0.645804	379	0.945268	0.358839	1.38997	0.158564	0.345006	0.459599
Airways	X6_36135	MURICA	MURICATRUE	1	0.646089	92	0.469748	0.0978261	0.504173	-0.548916	1.19537	-0.459203
Oral	X6_104115	MURICA	MURICATRUE	1	0.646887	379	0.819612	0.253298	0.512293	-0.166959	0.364467	-0.458091
Oral	X6_25433	DSUBFED	DSUBFED	1	0.647161	365	0.997987	0.457534	1.31047	0.082024	0.179205	0.457709
Gastrointestinal tract	X6_123414	OCPTN_ST	OCPTN_STTRUE	1	0.647201	46	1	0.5	1	-0.282587	0.617468	-0.457655
Oral	X6_108247	BMI_CAT	BMI_CATobese	1	0.647331	379	0.572084	0.134565	1.38997	-0.261377	0.571351	-0.457472
Oral	X6_56668	DSUDIET	DSUDIET	1	0.647407	365	0.989509	0.430137	0.222786	0.13113	0.286707	0.457367
Airways	X6_125450	BMI_CAT	BMI_CAToverweight	1	0.647832	92	0.353708	0.0652174	1.44118	0.38907	0.851774	0.456776
Oral	X6_158772	OCPTN_ST	OCPTN_STTRUE	1	0.648914	77	0.697205	0.818182	1	-0.290132	0.637272	-0.455271
Oral	X7_21650	EDLVL_BS	EDLVL_BSTRUE	1	0.649514	44	0.83777	0.25	0.903424	-0.370019	0.814235	-0.454437
Oral	X6_194344	BMI_CAT	BMI_CAToverweight	1	0.650385	379	0.725799	0.799472	1.38997	-0.122576	0.27045	-0.453227
Airways	X6_165971	DSUBFED	DSUBFED	1	0.650578	88	0.743153	0.204545	1.36952	0.218743	0.48292	0.452959
Gastrointestinal tract	X6_157252	DCMCODE_13	DCMCODE_13TRUE	1	0.651342	46	0.735986	0.804348	0.688113	0.522528	1.1563	0.451898
Oral	X6_36135	OCPTN_ST	OCPTN_STTRUE	1	0.651466	77	0.776065	0.220779	1	0.260056	0.575693	0.451726
Oral	X6_211583	DSUBFED	DSUBFED	1	0.651868	365	0.982109	0.413699	1.31047	0.083384	0.184818	0.451169
Airways	X6_107346	DCMCODE_13	DCMCODE_13TRUE	1	0.65287	19	0.678954	0.157895	0.8916	0.693147	1.54109	0.449778
Airways	X6_83290	DCMCODE_13	DCMCODE_13TRUE	1	0.65287	19	0.678954	0.157895	0.8916	0.693147	1.54109	0.449778
Airways	X6_103412	DCMCODE_13	DCMCODE_13TRUE	1	0.652874	19	0.525087	0.105263	0.8916	0.693147	1.5411	0.449773
Airways	X6_30726	DCMCODE_13	DCMCODE_13TRUE	1	0.652874	19	0.525087	0.105263	0.8916	0.693147	1.5411	0.449773
Airways	X6_118862	DCMCODE_13	DCMCODE_13TRUE	1	0.652874	19	0.525087	0.105263	0.8916	0.693147	1.5411	0.449773
Airways	X6_139150	DCMCODE_13	DCMCODE_13TRUE	1	0.652874	19	0.525087	0.105263	0.8916	0.693147	1.5411	0.449773
Airways	X6_69184	DCMCODE_13	DCMCODE_13TRUE	1	0.652874	19	0.525087	0.105263	0.8916	0.693147	1.5411	0.449773
Airways	X6_96390	DCMCODE_13	DCMCODE_13TRUE	1	0.652874	19	0.525087	0.105263	0.8916	0.693147	1.5411	0.449773
Oral	X6_64207	DSUBFED	DSUBFED	1	0.653925	365	0.846592	0.728767	1.31047	-0.0873847	0.194917	-0.448317
Gastrointestinal tract	X6_17925	BMI_CAT	BMI_CAToverweight	1	0.654642	111	0.961888	0.630631	1.43492	0.19212	0.429487	0.447323
Oral	X6_154692	EDLVL_BS	EDLVL_BSTRUE	1	0.654675	44	0.59435	0.863636	0.903424	-0.548954	1.22732	-0.447277
Oral	X6_39471	EDLVL_BS	EDLVL_BSTRUE	1	0.654675	44	0.59435	0.863636	0.903424	-0.548954	1.22732	-0.447277
Gastrointestinal tract	X6_205736	MURICA	MURICATRUE	1	0.654716	111	1	0.522523	0.500955	-0.277375	0.620219	-0.44722
Gastrointestinal tract	X6_90929	OCPTN_ST	OCPTN_STTRUE	1	0.656045	46	0.77935	0.217391	1	-0.36609	0.821971	-0.44538
Gastrointestinal tract	X6_71475	DCMCODE_13	DCMCODE_13TRUE	1	0.657975	46	0.913278	0.695652	0.688113	-0.362221	0.818187	-0.442711
Gastrointestinal tract	X6_62357	MURICA	MURICATRUE	1	0.658659	111	0.76316	0.783784	0.500955	-0.359032	0.81272	-0.441766
Oral	X6_93518	MURICA	MURICATRUE	1	0.658674	379	0.698582	0.187335	0.512293	0.193298	0.437579	0.441744
Oral	X6_159048	OCPTN_ST	OCPTN_STTRUE	1	0.659847	77	0.603215	0.142857	1	-0.297614	0.676204	-0.440124
Oral	X6_144816	OCPTN_ST	OCPTN_STTRUE	1	0.659847	77	0.603215	0.142857	1	-0.297614	0.676204	-0.440124
Oral	X6_113993	EDLVL_BS	EDLVL_BSTRUE	1	0.660434	44	0.930381	0.681818	0.903424	-0.361704	0.82334	-0.439314
Skin	X6_146554	BMI_CAT	BMI_CATobese	1	0.661107	26	0.414864	0.0769231	1.35031	0.693147	1.58114	0.438385
Skin	X6_149008	BMI_CAT	BMI_CATobese	1	0.661107	26	0.414864	0.0769231	1.35031	0.693147	1.58114	0.438385
Gastrointestinal tract	X6_69531	DCMCODE_13	DCMCODE_13TRUE	1	0.661124	46	1	0.456522	0.688113	-0.353564	0.806555	-0.438362
Oral	X6_93518	OCPTN_ST	OCPTN_STTRUE	1	0.661333	77	0.725053	0.194805	1	-0.261552	0.59705	-0.438074
Gastrointestinal tract	X6_120450	BMI_CAT	BMI_CATobese	1	0.661661	111	0.500955	0.108108	1.43492	0.328665	0.751026	0.437621
Gastrointestinal tract	X6_80255	MURICA	MURICATRUE	1	0.661687	111	0.889288	0.297297	0.500955	0.308962	0.706061	0.437585
Gastrointestinal tract	X6_213360	BMI_CAT	BMI_CATobese	1	0.661702	111	0.472547	0.0990991	1.43492	-0.492329	1.12516	-0.437565
Skin	X6_165971	BMI_CAT	BMI_CATobese	1	0.662724	26	0.822404	0.230769	1.35031	-0.566524	1.29891	-0.436155
Gastrointestinal tract	X6_90887	MURICA	MURICATRUE	1	0.663068	111	0.52813	0.117117	0.500955	0.476781	1.09434	0.435681
Gastrointestinal tract	X6_85444	OCPTN_ST	OCPTN_STTRUE	1	0.664305	46	0.635305	0.847826	1	-0.373659	0.86101	-0.433978
Gastrointestinal tract	X6_183998	OCPTN_ST	OCPTN_STTRUE	1	0.664305	46	0.635305	0.152174	1	0.373659	0.86101	0.433978
Gastrointestinal tract	X6_49036	BMI_CAT	BMI_CATobese	1	0.66521	111	0.411615	0.918919	1.43492	0.48577	1.12257	0.432731
Gastrointestinal tract	X6_174007	BMI_CAT	BMI_CATobese	1	0.665429	111	0.910727	0.315315	1.43492	0.26926	0.622666	0.43243
Oral	X6_70847	DSUDIET	DSUDIET	1	0.665895	365	0.842644	0.268493	0.222786	0.133763	0.309788	0.431789
Skin	X6_39471	BMI_CAT	BMI_CAToverweight	1	0.666829	26	0.746234	0.192308	1.35031	0.67301	1.56331	0.430504
Skin	X6_56043	BMI_CAT	BMI_CAToverweight	1	0.666829	26	0.746234	0.192308	1.35031	0.67301	1.56331	0.430504
Skin	X6_66547	BMI_CAT	BMI_CAToverweight	1	0.666829	26	0.746234	0.192308	1.35031	0.67301	1.56331	0.430504
Skin	X6_62357	DSUBFED	DSUBFED	1	0.667039	23	0.97934	0.347826	1.55818	0.587787	1.36626	0.430216
Skin	X6_153897	DSUBFED	DSUBFED	1	0.667039	23	0.70964	0.173913	1.55818	-0.587787	1.36626	-0.430216
Oral	X6_154692	OCPTN_ST	OCPTN_STTRUE	1	0.667347	77	0.603215	0.857143	1	-0.293941	0.683916	-0.429792
Oral	X6_199978	DSUDIET	DSUDIET	1	0.667939	365	0.962342	0.619178	0.222786	-0.122861	0.286404	-0.428978
Gastrointestinal tract	X6_170154	OCPTN_ST	OCPTN_STTRUE	1	0.66812	46	0.359673	0.934783	1	0.556453	1.29791	0.42873
Gastrointestinal tract	X6_76152	OCPTN_ST	OCPTN_STTRUE	1	0.66812	46	0.359673	0.934783	1	0.556453	1.29791	0.42873
Gastrointestinal tract	X6_135930	OCPTN_ST	OCPTN_STTRUE	1	0.66812	46	0.359673	0.934783	1	0.556453	1.29791	0.42873
Gastrointestinal tract	X6_77230	OCPTN_ST	OCPTN_STTRUE	1	0.66812	46	0.359673	0.934783	1	0.556453	1.29791	0.42873
Oral	X6_195894	OCPTN_ST	OCPTN_STTRUE	1	0.668204	77	0.971915	0.376623	1	-0.209463	0.488698	-0.428615
Oral	X6_119084	DSUDIET	DSUDIET	1	0.669273	365	0.804574	0.243836	0.222786	-0.168455	0.394374	-0.427145
Gastrointestinal tract	X7_129304	BMI_CAT	BMI_CAToverweight	1	0.669464	111	0.825497	0.252252	1.43492	-0.205606	0.481644	-0.426884
Gastrointestinal tract	X6_60553	BMI_CAT	BMI_CATobese	1	0.669578	111	0.877715	0.711712	1.43492	-0.269472	0.631484	-0.426727
Airways	X6_110798	DSUBFED	DSUBFED	1	0.669678	88	0.989467	0.409091	1.36952	0.153495	0.359819	0.42659
Oral	X6_93518	BMI_CAT	BMI_CATobese	1	0.670101	379	0.698582	0.187335	1.38997	-0.192973	0.452978	-0.426009
Gastrointestinal tract	X6_139761	DSUBFED	DSUBFED	1	0.670193	108	0.700769	0.185185	1.18299	0.200837	0.471578	0.425883
Gastrointestinal tract	X7_132061	DSUBFED	DSUBFED	1	0.670219	108	1	0.546296	1.18299	0.155478	0.365103	0.425848
Oral	X6_85714	BMI_CAT	BMI_CAToverweight	1	0.67107	379	0.996383	0.451187	1.38997	-0.0948145	0.223261	-0.42468
Oral	X6_119084	MURICA	MURICATRUE	1	0.671488	379	0.835707	0.263852	0.512293	-0.155034	0.365554	-0.424107
Oral	X6_25433	DSUDIET	DSUDIET	1	0.672149	365	0.997987	0.457534	0.222786	0.121852	0.287931	0.4232
Urogenital tract	X6_25913	DSUBFED	DSUBFED	1	0.672528	64	0.556422	0.125	1.19836	0.334795	0.792077	0.422681
Airways	X6_61081	DSUBFED	DSUBFED	1	0.673167	88	0.407607	0.0795455	1.36952	-0.2784	0.660021	-0.421805
Gastrointestinal tract	X6_202994	OCPTN_ST	OCPTN_STTRUE	1	0.673652	46	0.853794	0.73913	1	-0.293397	0.696671	-0.421141
Oral	X6_66152	MURICA	MURICATRUE	1	0.673737	379	0.907018	0.680739	0.512293	-0.149432	0.354926	-0.421025
Gastrointestinal tract	X6_56715	BMI_CAT	BMI_CATobese	1	0.674167	111	0.442807	0.0900901	1.43492	-0.474185	1.12784	-0.420437
Oral	X6_173979	DSUBFED	DSUBFED	1	0.67436	365	0.973053	0.39726	1.31047	-0.0766035	0.182315	-0.420172
Oral	X6_156982	EDLVL_BS	EDLVL_BSTRUE	1	0.674723	44	0.707067	0.818182	0.903424	0.379856	0.905121	0.419674
Oral	X6_135880	EDLVL_BS	EDLVL_BSTRUE	1	0.674723	44	0.707067	0.181818	0.903424	-0.379856	0.905121	-0.419674
Oral	X6_36193	EDLVL_BS	EDLVL_BSTRUE	1	0.674723	44	0.707067	0.181818	0.903424	-0.379856	0.905121	-0.419674
Gastrointestinal tract	X6_157953	MURICA	MURICATRUE	1	0.67479	111	0.954704	0.63964	0.500955	0.261548	0.623352	0.419583
Skin	X6_213320	BMI_CAT	BMI_CAToverweight	1	0.674892	26	0.655157	0.153846	1.35031	0.566978	1.35174	0.419443
Oral	X6_188170	BMI_CAT	BMI_CAToverweight	1	0.675341	379	0.850972	0.274406	1.38997	0.105928	0.252915	0.418829
Airways	X6_52811	MURICA	MURICATRUE	1	0.67562	92	0.504173	0.108696	0.504173	-0.499513	1.19373	-0.418448
Urogenital tract	X6_103923	BMI_CAT	BMI_CAToverweight	1	0.675675	64	0.509889	0.109375	1.45931	0.377704	0.902792	0.418373
Oral	X6_179701	DCMCODE_13	DCMCODE_13TRUE	1	0.676939	80	0.978656	0.3875	0.621261	-0.275254	0.660647	-0.416643
Oral	X6_97267	DSUDIET	DSUDIET	1	0.677056	365	0.834582	0.736986	0.222786	0.140559	0.33749	0.416485
Gastrointestinal tract	X6_77230	MURICA	MURICATRUE	1	0.677072	111	0.554155	0.873874	0.500955	-0.4544	1.0911	-0.416461
Skin	X6_103412	DSUBFED	DSUBFED	1	0.677931	23	0.595609	0.130435	1.55818	-0.485619	1.16935	-0.415288
Skin	X6_113953	DSUBFED	DSUBFED	1	0.677931	23	0.595609	0.130435	1.55818	-0.485619	1.16935	-0.415288
Gastrointestinal tract	X6_59371	DSUBFED	DSUBFED	1	0.678535	108	0.888339	0.296296	1.18299	0.163681	0.394924	0.414462
Gastrointestinal tract	X6_113993	OCPTN_ST	OCPTN_STTRUE	1	0.679073	46	0.688113	0.173913	1	-0.341635	0.825747	-0.413728
Gastrointestinal tract	X6_62357	OCPTN_ST	OCPTN_STTRUE	1	0.679073	46	0.688113	0.826087	1	0.341635	0.825747	0.413728
Gastrointestinal tract	X6_63487	OCPTN_ST	OCPTN_STTRUE	1	0.679073	46	0.688113	0.173913	1	-0.341635	0.825747	-0.413728
Gastrointestinal tract	X6_67816	OCPTN_ST	OCPTN_STTRUE	1	0.679073	46	0.688113	0.173913	1	-0.341635	0.825747	-0.413728
Oral	X6_24671	DSUDIET	DSUDIET	1	0.679211	365	0.940764	0.353425	0.222786	0.121478	0.293751	0.41354
Gastrointestinal tract	X6_56715	BMI_CAT	BMI_CAToverweight	1	0.67972	111	0.442807	0.0900901	1.43492	-0.307706	0.74533	-0.412845
Skin	X6_66547	OCPTN_ST	OCPTN_STTRUE	1	0.679952	13	0.970951	0.307692	1	-0.510826	1.23828	-0.412529
Skin	X6_99853	OCPTN_ST	OCPTN_STTRUE	1	0.679952	13	0.970951	0.307692	1	-0.510826	1.23828	-0.412529
Skin	X6_56043	OCPTN_ST	OCPTN_STTRUE	1	0.679952	13	0.970951	0.307692	1	-0.510826	1.23828	-0.412529
Skin	X6_65847	OCPTN_ST	OCPTN_STTRUE	1	0.679952	13	0.970951	0.307692	1	-0.510826	1.23828	-0.412529
Skin	X6_92260	OCPTN_ST	OCPTN_STTRUE	1	0.679952	13	0.970951	0.307692	1	-0.510826	1.23828	-0.412529
Oral	X6_116723	DCMCODE_13	DCMCODE_13TRUE	1	0.680418	80	0.978656	0.3875	0.621261	-0.2758	0.669593	-0.411892
Gastrointestinal tract	X6_44338	BMI_CAT	BMI_CAToverweight	1	0.680515	111	0.980219	0.603604	1.43492	-0.172695	0.419406	-0.41176
Oral	X6_197923	MURICA	MURICATRUE	1	0.680694	379	0.993235	0.440633	0.512293	0.137572	0.334306	0.411516
Gastrointestinal tract	X6_188170	DCMCODE_13	DCMCODE_13TRUE	1	0.680696	46	0.998196	0.586957	0.688113	0.34213	0.831395	0.411514
Gastrointestinal tract	X7_214048	MURICA	MURICATRUE	1	0.681006	111	0.974651	0.612613	0.500955	-0.266044	0.647167	-0.41109
Urogenital tract	X6_56043	DSUBFED	DSUBFED	1	0.681247	64	0.34554	0.0625	1.19836	0.517593	1.26008	0.410762
Urogenital tract	X6_67816	DSUBFED	DSUBFED	1	0.681247	64	0.34554	0.0625	1.19836	0.517593	1.26008	0.410762
Gastrointestinal tract	X6_109965	DSUBFED	DSUBFED	1	0.681614	108	0.807018	0.240741	1.18299	-0.172573	0.420641	-0.410261
Gastrointestinal tract	X6_199642	OCPTN_ST	OCPTN_STTRUE	1	0.681744	46	0.440556	0.0869565	1	0.448788	1.09438	0.410085
Gastrointestinal tract	X6_143839	BMI_CAT	BMI_CATobese	1	0.681938	111	0.709098	0.189189	1.43492	0.304407	0.742782	0.40982
Oral	X6_184627	BMI_CAT	BMI_CAToverweight	1	0.682093	379	0.798289	0.759894	1.38997	-0.106531	0.260079	-0.409608
Oral	X6_49947	BMI_CAT	BMI_CATobese	1	0.682644	379	0.789376	0.765172	1.38997	-0.165097	0.4038	-0.408858
Oral	X6_195894	DSUBFED	DSUBFED	1	0.682782	365	0.930805	0.342466	1.31047	-0.0757213	0.185287	-0.40867
Oral	X6_173979	DSUDIET	DSUDIET	1	0.682915	365	0.973053	0.39726	0.222786	-0.12612	0.308748	-0.408489
Oral	X6_33024	MURICA	MURICATRUE	1	0.68299	379	0.65155	0.166227	0.512293	0.190235	0.465821	0.408387
Oral	X6_54148	DSUBFED	DSUBFED	1	0.683098	365	0.947732	0.361644	1.31047	-0.0756358	0.185273	-0.408239
Gastrointestinal tract	X6_90688	BMI_CAT	BMI_CAToverweight	1	0.683681	111	0.900289	0.693694	1.43492	-0.1788	0.43883	-0.407446
Gastrointestinal tract	X6_104618	OCPTN_ST	OCPTN_STTRUE	1	0.684703	46	0.577004	0.869565	1	0.387029	0.953148	0.406054
Gastrointestinal tract	X6_111258	OCPTN_ST	OCPTN_STTRUE	1	0.684703	46	0.577004	0.130435	1	-0.387029	0.953148	-0.406054
Gastrointestinal tract	X6_122057	BMI_CAT	BMI_CATobese	1	0.684875	111	0.961888	0.369369	1.43492	0.242226	0.596882	0.40582
Gastrointestinal tract	X6_157252	DSUBFED	DSUBFED	1	0.686368	108	0.863782	0.722222	1.18299	0.16889	0.418263	0.403789
Gastrointestinal tract	X6_110310	OCPTN_ST	OCPTN_STTRUE	1	0.686587	46	1	0.434783	1	-0.251314	0.62285	-0.403491
Gastrointestinal tract	X6_188170	MURICA	MURICATRUE	1	0.686594	111	0.968538	0.621622	0.500955	-0.262626	0.6509	-0.403482
Skin	X6_110798	DSUBFED	DSUBFED	1	0.686659	23	0.70964	0.826087	1.55818	-0.332264	0.823674	-0.403393
Oral	X6_205297	DSUBFED	DSUBFED	1	0.686822	365	0.983458	0.416438	1.31047	-0.0728905	0.180793	-0.403171
Urogenital tract	X6_30726	BMI_CAT	BMI_CATobese	1	0.688963	64	0.509889	0.109375	1.45931	0.526215	1.31467	0.400262
Gastrointestinal tract	X6_150369	DCMCODE_13	DCMCODE_13TRUE	1	0.689377	46	0.512449	0.891304	0.688113	-0.510826	1.27802	-0.399701
Oral	X6_144765	DSUBFED	DSUBFED	1	0.68977	365	0.994384	0.443836	1.31047	-0.0709085	0.177641	-0.399168
Airways	X6_205688	BMI_CAT	BMI_CAToverweight	1	0.690072	92	0.353708	0.0652174	1.44118	-0.361926	0.907634	-0.398758
Gastrointestinal tract	X6_85519	BMI_CAT	BMI_CAToverweight	1	0.690222	111	0.500955	0.891892	1.43492	0.295376	0.74112	0.398554
Oral	X6_202842	MURICA	MURICATRUE	1	0.69118	379	0.725799	0.799472	0.512293	0.154593	0.389155	0.397254
Urogenital tract	X6_49238	BMI_CAT	BMI_CATobese	1	0.691636	64	0.677358	0.171875	1.45931	-0.470627	1.18655	-0.396636
Gastrointestinal tract	X6_95788	DSUBFED	DSUBFED	1	0.691777	108	0.94774	0.648148	1.18299	0.157897	0.398283	0.396444
Gastrointestinal tract	X6_91527	DCMCODE_13	DCMCODE_13TRUE	1	0.691992	46	0.688113	0.173913	0.688113	0.393645	0.993668	0.396153
Oral	X6_118674	BMI_CAT	BMI_CATobese	1	0.692515	379	0.843442	0.269129	1.38997	-0.150938	0.381693	-0.395444
Gastrointestinal tract	X6_41475	DSUBFED	DSUBFED	1	0.693188	108	1	0.537037	1.18299	0.146159	0.370461	0.394532
Gastrointestinal tract	X6_73558	BMI_CAT	BMI_CATobese	1	0.693694	111	0.961888	0.630631	1.43492	-0.234535	0.595497	-0.393847
Skin	X6_161782	BMI_CAT	BMI_CATobese	1	0.693779	26	1	0.538462	1.35031	-0.473412	1.20237	-0.393732
Oral	X6_177609	DSUDIET	DSUDIET	1	0.693948	365	0.976255	0.40274	0.222786	-0.12166	0.309172	-0.393503
Oral	X6_127775	DSUDIET	DSUDIET	1	0.694678	365	0.578662	0.136986	0.222786	-0.208523	0.531249	-0.392515
Gastrointestinal tract	X6_98858	OCPTN_ST	OCPTN_STTRUE	1	0.694782	46	0.937734	0.673913	1	-0.287062	0.731602	-0.392374
Oral	X6_104618	BMI_CAT	BMI_CATobese	1	0.694931	379	1	0.522427	1.38997	-0.132815	0.338666	-0.392173
Gastrointestinal tract	X6_184881	OCPTN_ST	OCPTN_STTRUE	1	0.695315	46	0.913278	0.304348	1	0.273824	0.699151	0.391652
Gastrointestinal tract	X6_113993	DCMCODE_13	DCMCODE_13TRUE	1	0.695542	46	0.688113	0.173913	0.688113	-0.451148	1.15281	-0.391345
Gastrointestinal tract	X6_62357	DCMCODE_13	DCMCODE_13TRUE	1	0.695542	46	0.688113	0.826087	0.688113	0.451148	1.15281	0.391345
Gastrointestinal tract	X6_67816	DCMCODE_13	DCMCODE_13TRUE	1	0.695542	46	0.688113	0.173913	0.688113	-0.451148	1.15281	-0.391345
Gastrointestinal tract	X6_114478	DCMCODE_13	DCMCODE_13TRUE	1	0.695542	46	0.688113	0.173913	0.688113	-0.451148	1.15281	-0.391345
Gastrointestinal tract	X6_147771	DCMCODE_13	DCMCODE_13TRUE	1	0.695542	46	0.688113	0.173913	0.688113	-0.451148	1.15281	-0.391345
Gastrointestinal tract	X6_98921	OCPTN_ST	OCPTN_STTRUE	1	0.695594	46	0.998196	0.413043	1	0.244155	0.623999	0.391275
Gastrointestinal tract	X6_187059	MURICA	MURICATRUE	1	0.695893	111	0.76316	0.783784	0.500955	-0.31856	0.815002	-0.390871
Gastrointestinal tract	X6_100105	DCMCODE_13	DCMCODE_13TRUE	1	0.69595	46	0.885327	0.717391	0.688113	-0.348234	0.891095	-0.390793
Gastrointestinal tract	X6_90688	DCMCODE_13	DCMCODE_13TRUE	1	0.69595	46	0.885327	0.717391	0.688113	-0.348234	0.891095	-0.390793
Gastrointestinal tract	X6_118674	DCMCODE_13	DCMCODE_13TRUE	1	0.696266	46	0.735986	0.804348	0.688113	0.461995	1.18349	0.390366
Airways	X6_118862	BMI_CAT	BMI_CATobese	1	0.697237	92	0.262466	0.0434783	1.44118	0.502553	1.29173	0.389053
Gastrointestinal tract	X6_107271	DCMCODE_13	DCMCODE_13TRUE	1	0.698284	46	0.735986	0.804348	0.688113	-0.358041	0.923648	-0.387638
Oral	X6_123660	BMI_CAT	BMI_CATobese	1	0.699109	379	0.999956	0.472296	1.38997	0.131545	0.340328	0.386524
Gastrointestinal tract	X6_95845	DCMCODE_13	DCMCODE_13TRUE	1	0.69912	46	0.937734	0.673913	0.688113	-0.316324	0.818414	-0.386508
Gastrointestinal tract	X6_188170	OCPTN_ST	OCPTN_STTRUE	1	0.699814	46	0.998196	0.586957	1	0.247978	0.643143	0.385572
Oral	X6_117494	MURICA	MURICATRUE	1	0.70048	379	0.784836	0.76781	0.512293	-0.153092	0.397981	-0.384672
Gastrointestinal tract	X6_146554	DSUBFED	DSUBFED	1	0.701146	108	0.836711	0.740741	1.18299	0.162816	0.424249	0.383774
Airways	X6_139150	BMI_CAT	BMI_CAToverweight	1	0.70127	92	0.262466	0.0434783	1.44118	0.399659	1.04184	0.383607
Gastrointestinal tract	X6_133942	BMI_CAT	BMI_CATobese	1	0.701819	111	0.709098	0.189189	1.43492	-0.323562	0.845104	-0.382866
Oral	X6_85714	DSUDIET	DSUDIET	1	0.701945	365	0.997987	0.457534	0.222786	-0.112035	0.292752	-0.382697
Gastrointestinal tract	X6_31735	DCMCODE_13	DCMCODE_13TRUE	1	0.702215	46	1	0.456522	0.688113	-0.312422	0.817147	-0.382333
Oral	X6_49238	DCMCODE_13	DCMCODE_13TRUE	1	0.702524	80	0.880927	0.2875	0.621261	0.255763	0.669685	0.381915
Oral	X6_49947	DSUDIET	DSUDIET	1	0.703294	365	0.795476	0.761644	0.222786	-0.118161	0.310234	-0.380877
Oral	X6_197923	DCMCODE_13	DCMCODE_13TRUE	1	0.704029	80	1	0.55	0.621261	-0.238334	0.627382	-0.379887
Oral	X6_120450	DSUDIET	DSUDIET	1	0.704171	365	0.95214	0.367123	0.222786	0.111656	0.294066	0.379697
Gastrointestinal tract	X6_56522	OCPTN_ST	OCPTN_STTRUE	1	0.705034	46	0.512449	0.108696	1	0.398923	1.05386	0.378533
Oral	X6_159659	BMI_CAT	BMI_CATobese	1	0.705082	379	0.998718	0.538259	1.38997	0.130765	0.34551	0.378469
Oral	X6_91527	BMI_CAT	BMI_CAToverweight	1	0.705359	379	0.94961	0.364116	1.38997	0.0874758	0.231358	0.378097
Oral	X6_113993	DSUDIET	DSUDIET	1	0.706042	365	0.99671	0.452055	0.222786	0.10831	0.287159	0.377177
Skin	X6_179748	DSUBFED	DSUBFED	1	0.707163	23	0.276195	0.0434783	1.55818	0.509392	1.35596	0.375669
Oral	X6_44338	EDLVL_BS	EDLVL_BSTRUE	1	0.707188	44	0.83777	0.75	0.903424	-0.321943	0.857064	-0.375635
Oral	X7_123707	BMI_CAT	BMI_CAToverweight	1	0.707299	379	0.879089	0.295515	1.38997	-0.0924491	0.246212	-0.375486
Oral	X6_66152	BMI_CAT	BMI_CATobese	1	0.707512	379	0.907018	0.680739	1.38997	-0.139123	0.370797	-0.375199
Airways	X6_39457	BMI_CAT	BMI_CAToverweight	1	0.707879	92	0.353708	0.0652174	1.44118	0.386993	1.03279	0.374706
Gastrointestinal tract	X6_94538	OCPTN_ST	OCPTN_STTRUE	1	0.708148	46	1	0.456522	1	0.240801	0.64326	0.374345
Airways	X6_25913	OCPTN_ST	OCPTN_STTRUE	1	0.708489	19	0.678954	0.157895	1	-0.510826	1.36626	-0.373886
Airways	X6_104120	OCPTN_ST	OCPTN_STTRUE	1	0.708489	19	0.678954	0.157895	1	-0.510826	1.36626	-0.373886
Airways	X6_107496	OCPTN_ST	OCPTN_STTRUE	1	0.708489	19	0.678954	0.157895	1	-0.510826	1.36626	-0.373886
Airways	X6_205688	OCPTN_ST	OCPTN_STTRUE	1	0.708489	19	0.678954	0.157895	1	-0.510826	1.36626	-0.373886
Airways	X6_58645	OCPTN_ST	OCPTN_STTRUE	1	0.708489	19	0.678954	0.157895	1	-0.510826	1.36626	-0.373886
Airways	X6_61081	OCPTN_ST	OCPTN_STTRUE	1	0.708489	19	0.678954	0.157895	1	-0.510826	1.36626	-0.373886
Oral	X6_30161	DCMCODE_13	DCMCODE_13TRUE	1	0.7089	80	1	0.45	0.621261	0.234611	0.628421	0.373334
Gastrointestinal tract	X6_98921	MURICA	MURICATRUE	1	0.709195	111	0.961888	0.369369	0.500955	0.244559	0.655765	0.372937
Gastrointestinal tract	X6_134746	MURICA	MURICATRUE	1	0.709252	111	0.745871	0.792793	0.500955	0.266095	0.713659	0.372861
Airways	X6_107346	BMI_CAT	BMI_CAToverweight	1	0.710287	92	0.309787	0.0543478	1.44118	0.382734	1.03032	0.371471
Gastrointestinal tract	X6_105476	DSUBFED	DSUBFED	1	0.710326	108	1	0.490741	1.18299	0.137528	0.370277	0.371419
Oral	X6_125450	EDLVL_BS	EDLVL_BSTRUE	1	0.711845	44	0.65361	0.840909	0.903424	-0.37343	1.01097	-0.36938
Gastrointestinal tract	X6_211583	BMI_CAT	BMI_CAToverweight	1	0.712456	111	0.648049	0.837838	1.43492	-0.204707	0.555425	-0.368559
Airways	X6_39471	BMI_CAT	BMI_CAToverweight	1	0.713057	92	0.262466	0.0434783	1.44118	0.378117	1.02818	0.367754
Urogenital tract	X6_49238	BMI_CAT	BMI_CAToverweight	1	0.713578	64	0.677358	0.171875	1.45931	-0.269933	0.7354	-0.367055
Oral	X6_182765	DSUBFED	DSUBFED	1	0.715425	365	0.838641	0.265753	1.31047	0.0767967	0.210644	0.36458
Gastrointestinal tract	X6_85444	DSUBFED	DSUBFED	1	0.715474	108	0.680311	0.824074	1.18299	0.186542	0.511753	0.364515
Gastrointestinal tract	X6_110310	BMI_CAT	BMI_CATobese	1	0.71613	111	0.999951	0.45045	1.43492	0.212716	0.584969	0.363636
Oral	X6_213360	EDLVL_BS	EDLVL_BSTRUE	1	0.716366	44	0.953511	0.340909	0.903424	-0.274866	0.75654	-0.36332
Oral	X6_205407	EDLVL_BS	EDLVL_BSTRUE	1	0.716382	44	0.930381	0.318182	0.903424	-0.29047	0.799535	-0.363299
Gastrointestinal tract	X6_114478	BMI_CAT	BMI_CATobese	1	0.716493	111	0.625998	0.153153	1.43492	-0.303359	0.835353	-0.36315
Gastrointestinal tract	X6_109965	BMI_CAT	BMI_CAToverweight	1	0.717039	111	0.810899	0.243243	1.43492	-0.183418	0.506094	-0.362418
Gastrointestinal tract	X6_120450	MURICA	MURICATRUE	1	0.717524	111	0.500955	0.108108	0.500955	0.398105	1.10044	0.36177
Oral	X6_26759	BMI_CAT	BMI_CAToverweight	1	0.717619	379	0.936055	0.348285	1.38997	0.0834156	0.230658	0.361643
Gastrointestinal tract	X6_76803	BMI_CAT	BMI_CATobese	1	0.718017	111	0.779748	0.225225	1.43492	0.24137	0.66841	0.361111
Oral	X6_123660	DSUDIET	DSUDIET	1	0.719551	365	0.999929	0.471233	0.222786	-0.105341	0.293381	-0.35906
Gastrointestinal tract	X7_132061	MURICA	MURICATRUE	1	0.719693	111	0.999951	0.54955	0.500955	0.219946	0.612886	0.358869
Oral	X6_194344	MURICA	MURICATRUE	1	0.719771	379	0.725799	0.799472	0.512293	-0.149648	0.417121	-0.358765
Airways	X6_52811	OCPTN_ST	OCPTN_STTRUE	1	0.721	19	0.799049	0.210526	1	0.403834	1.1308	0.357122
Oral	X6_118862	DSUBFED	DSUBFED	1	0.721259	365	0.593086	0.857534	1.31047	-0.0885178	0.248104	-0.356776
Oral	X6_197923	BMI_CAT	BMI_CAToverweight	1	0.721284	379	0.993235	0.440633	1.38997	0.0802647	0.224993	0.356743
Gastrointestinal tract	X6_77477	MURICA	MURICATRUE	1	0.721634	111	0.900289	0.306306	0.500955	-0.23802	0.668076	-0.356276
Gastrointestinal tract	X6_96390	BMI_CAT	BMI_CATobese	1	0.723016	111	0.689564	0.18018	1.43492	-0.298091	0.841038	-0.354431
Gastrointestinal tract	X6_104327	MURICA	MURICATRUE	1	0.724622	111	0.745871	0.792793	0.500955	-0.286787	0.814069	-0.352288
Oral	X6_54148	MURICA	MURICATRUE	1	0.724676	379	0.945268	0.358839	0.512293	-0.119143	0.338267	-0.352217
Oral	X6_113993	DSUBFED	DSUBFED	1	0.724987	365	0.99671	0.452055	1.31047	0.0627739	0.178436	0.351801
Urogenital tract	X6_161782	BMI_CAT	BMI_CATobese	1	0.725112	64	0.556422	0.125	1.45931	0.44783	1.27356	0.351635
Gastrointestinal tract	X6_122057	DCMCODE_13	DCMCODE_13TRUE	1	0.725495	46	1	0.456522	0.688113	0.277174	0.789389	0.351124
Gastrointestinal tract	X6_118674	BMI_CAT	BMI_CATobese	1	0.726049	111	0.839464	0.738739	1.43492	0.230907	0.659009	0.350385
Oral	X6_61652	EDLVL_BS	EDLVL_BSTRUE	1	0.726473	44	1	0.477273	0.903424	-0.267471	0.764593	-0.349821
Oral	X6_26759	EDLVL_BS	EDLVL_BSTRUE	1	0.726473	44	1	0.477273	0.903424	-0.267471	0.764593	-0.349821
Gastrointestinal tract	X6_75391	BMI_CAT	BMI_CATobese	1	0.726815	111	0.648049	0.162162	1.43492	0.309367	0.885512	0.349366
Airways	X6_49238	OCPTN_ST	OCPTN_STTRUE	1	0.726861	19	1	0.421053	1	-0.331647	0.949452	-0.349304
Airways	X6_26906	DSUBFED	DSUBFED	1	0.726949	88	0.218415	0.0340909	1.36952	0.283203	0.811035	0.349187
Oral	X6_103412	DCMCODE_13	DCMCODE_13TRUE	1	0.727155	80	1	0.4625	0.621261	-0.221511	0.634862	-0.348912
Oral	X6_190669	DSUDIET	DSUDIET	1	0.727212	365	0.696485	0.813699	0.222786	-0.118456	0.339575	-0.348836
Oral	X6_135314	EDLVL_BS	EDLVL_BSTRUE	1	0.727262	44	0.872595	0.272727	0.903424	0.292099	0.837512	0.34877
Gastrointestinal tract	X6_183641	BMI_CAT	BMI_CAToverweight	1	0.727662	111	0.825497	0.252252	1.43492	0.164707	0.472974	0.348237
Gastrointestinal tract	X7_125528	DSUBFED	DSUBFED	1	0.727832	108	0.899705	0.305556	1.18299	0.13664	0.392632	0.348011
Gastrointestinal tract	X6_133809	DSUBFED	DSUBFED	1	0.727894	108	0.94774	0.351852	1.18299	-0.132538	0.380934	-0.347928
Oral	X6_90845	OCPTN_ST	OCPTN_STTRUE	1	0.728034	77	0.697205	0.181818	1	0.214155	0.615845	0.347742
Gastrointestinal tract	X6_56043	BMI_CAT	BMI_CAToverweight	1	0.728057	111	0.825497	0.747748	1.43492	0.17508	0.50352	0.347712
Oral	X6_128749	DSUBFED	DSUBFED	1	0.728266	365	0.896235	0.690411	1.31047	-0.06571	0.18913	-0.347433
Gastrointestinal tract	X6_145397	BMI_CAT	BMI_CAToverweight	1	0.729068	111	0.996554	0.567568	1.43492	0.145565	0.420264	0.346366
Gastrointestinal tract	X6_139150	BMI_CAT	BMI_CAToverweight	1	0.729241	111	0.795655	0.234234	1.43492	0.173311	0.500702	0.346135
Gastrointestinal tract	X6_113649	BMI_CAT	BMI_CATobese	1	0.72946	111	0.889288	0.702703	1.43492	0.226865	0.655974	0.345844
Urogenital tract	X6_67816	BMI_CAT	BMI_CATobese	1	0.729677	64	0.34554	0.0625	1.45931	0.457002	1.32251	0.345556
Gastrointestinal tract	X6_142856	BMI_CAT	BMI_CATobese	1	0.729771	111	1	0.522523	1.43492	0.200653	0.580879	0.34543
Gastrointestinal tract	X6_90688	DSUBFED	DSUBFED	1	0.730067	108	0.876369	0.712963	1.18299	-0.137724	0.399157	-0.345036
Gastrointestinal tract	X6_157953	DSUBFED	DSUBFED	1	0.73127	108	0.939283	0.657407	1.18299	-0.131624	0.383256	-0.343436
Gastrointestinal tract	X6_41475	BMI_CAT	BMI_CAToverweight	1	0.731656	111	1	0.531532	1.43492	-0.144557	0.421541	-0.342924
Oral	X6_173387	BMI_CAT	BMI_CATobese	1	0.73219	379	0.79386	0.762533	1.38997	-0.138008	0.403281	-0.342214
Airways	X6_141640	OCPTN_ST	OCPTN_STTRUE	1	0.73336	19	0.799049	0.210526	1	0.405465	1.19024	0.340659
Airways	X6_213320	OCPTN_ST	OCPTN_STTRUE	1	0.73336	19	0.799049	0.210526	1	0.405465	1.19024	0.340659
Airways	X6_36135	OCPTN_ST	OCPTN_STTRUE	1	0.73336	19	0.799049	0.210526	1	0.405465	1.19024	0.340659
Gastrointestinal tract	X6_181184	DCMCODE_13	DCMCODE_13TRUE	1	0.734166	46	0.635305	0.152174	0.688113	-0.399741	1.17713	-0.339589
Gastrointestinal tract	X6_96390	DCMCODE_13	DCMCODE_13TRUE	1	0.734166	46	0.635305	0.152174	0.688113	-0.399741	1.17713	-0.339589
Oral	X6_196036	DSUDIET	DSUDIET	1	0.734211	365	0.967905	0.610959	0.222786	0.0997608	0.293821	0.339529
Skin	X6_173132	BMI_CAT	BMI_CATobese	1	0.734235	26	0.746234	0.192308	1.35031	-0.449295	1.32341	-0.339498
Airways	X6_25913	BMI_CAT	BMI_CATobese	1	0.734533	92	0.353708	0.0652174	1.44118	0.439942	1.29738	0.339101
Oral	X6_99002	BMI_CAT	BMI_CATobese	1	0.734967	379	0.736241	0.205805	1.38997	0.13296	0.392762	0.338526
Oral	X6_158772	DCMCODE_13	DCMCODE_13TRUE	1	0.735204	80	0.759926	0.7875	0.621261	-0.259511	0.767306	-0.338211
Gastrointestinal tract	X6_194344	DCMCODE_13	DCMCODE_13TRUE	1	0.73541	46	0.913278	0.304348	0.688113	-0.30163	0.892561	-0.337938
Gastrointestinal tract	X6_95788	DCMCODE_13	DCMCODE_13TRUE	1	0.73541	46	0.913278	0.695652	0.688113	0.30163	0.892561	0.337938
Gastrointestinal tract	X6_141836	BMI_CAT	BMI_CATobese	1	0.736112	111	0.865561	0.279279	1.43492	-0.240875	0.714748	-0.337007
Gastrointestinal tract	X6_183641	DCMCODE_13	DCMCODE_13TRUE	1	0.736152	46	0.937734	0.326087	0.688113	-0.310023	0.920076	-0.336954
Skin	X6_107860	OCPTN_ST	OCPTN_STTRUE	1	0.736436	13	0.863121	0.230769	1	0.470004	1.39642	0.336577
Skin	X6_39457	OCPTN_ST	OCPTN_STTRUE	1	0.736436	13	0.863121	0.230769	1	0.470004	1.39642	0.336577
Skin	X6_42014	OCPTN_ST	OCPTN_STTRUE	1	0.736436	13	0.863121	0.230769	1	0.470004	1.39642	0.336577
Skin	X6_49947	OCPTN_ST	OCPTN_STTRUE	1	0.736436	13	0.863121	0.230769	1	0.470004	1.39642	0.336577
Skin	X6_81136	OCPTN_ST	OCPTN_STTRUE	1	0.736436	13	0.863121	0.230769	1	0.470004	1.39642	0.336577
Skin	X6_90240	OCPTN_ST	OCPTN_STTRUE	1	0.736436	13	0.970951	0.307692	1	0.470004	1.39642	0.336577
Oral	X6_128085	BMI_CAT	BMI_CATobese	1	0.737617	379	0.999956	0.472296	1.38997	0.113592	0.33907	0.33501
Oral	X6_92037	DSUBFED	DSUBFED	1	0.73833	365	0.607153	0.852055	1.31047	-0.0796682	0.23848	-0.334066
Airways	X6_49947	DSUBFED	DSUBFED	1	0.738372	88	0.218415	0.0340909	1.36952	-0.498484	1.49242	-0.334011
Urogenital tract	X6_103923	DSUBFED	DSUBFED	1	0.739498	64	0.509889	0.109375	1.19836	0.267271	0.80378	0.332518
Urogenital tract	X6_36135	DSUBFED	DSUBFED	1	0.739498	64	0.509889	0.109375	1.19836	0.267271	0.80378	0.332518
Oral	X6_109255	MURICA	MURICATRUE	1	0.739739	379	0.687237	0.182058	0.512293	-0.140521	0.423001	-0.332199
Oral	X6_62025	BMI_CAT	BMI_CATobese	1	0.740137	379	0.839601	0.733509	1.38997	0.13366	0.402988	0.331672
Gastrointestinal tract	X6_98694	DSUBFED	DSUBFED	1	0.740171	108	0.720396	0.194444	1.18299	0.148731	0.448489	0.331627
Oral	X6_92251	BMI_CAT	BMI_CATobese	1	0.740351	379	0.572084	0.134565	1.38997	0.153296	0.462586	0.331389
Gastrointestinal tract	X6_115024	BMI_CAT	BMI_CAToverweight	1	0.740559	111	0.648049	0.162162	1.43492	-0.200684	0.606087	-0.331113
Gastrointestinal tract	X6_105916	BMI_CAT	BMI_CAToverweight	1	0.740561	111	1	0.495495	1.43492	-0.138345	0.417821	-0.331111
Gastrointestinal tract	X6_196806	BMI_CAT	BMI_CATobese	1	0.740796	111	0.825497	0.252252	1.43492	-0.214839	0.649453	-0.3308
Oral	X6_120450	OCPTN_ST	OCPTN_STTRUE	1	0.741501	77	0.999975	0.441558	1	-0.157719	0.47813	-0.329867
Urogenital tract	X6_25913	BMI_CAT	BMI_CATobese	1	0.74164	64	0.556422	0.125	1.45931	0.432196	1.31095	0.329682
Gastrointestinal tract	X6_148554	BMI_CAT	BMI_CATobese	1	0.741722	111	0.500955	0.891892	1.43492	-0.287859	0.873428	-0.329574
Gastrointestinal tract	X6_37664	MURICA	MURICATRUE	1	0.74249	111	0.877715	0.711712	0.500955	-0.23127	0.703897	-0.328557
Gastrointestinal tract	X6_59371	MURICA	MURICATRUE	1	0.74249	111	0.877715	0.288288	0.500955	0.23127	0.703897	0.328557
Gastrointestinal tract	X6_148529	DSUBFED	DSUBFED	1	0.742532	108	0.8222	0.25	1.18299	-0.136257	0.414783	-0.328502
Oral	X6_24722	DSUBFED	DSUBFED	1	0.742572	365	0.988392	0.572603	1.31047	-0.0586746	0.178641	-0.32845
Oral	X6_211583	DSUDIET	DSUDIET	1	0.742894	365	0.982109	0.413699	0.222786	0.0974118	0.296966	0.328023
Gastrointestinal tract	X6_98858	DSUBFED	DSUBFED	1	0.74299	108	0.930256	0.666667	1.18299	0.126147	0.384716	0.327896
Oral	X6_44338	MURICA	MURICATRUE	1	0.743284	379	0.882383	0.701847	0.512293	0.114183	0.348642	0.327508
Gastrointestinal tract	X6_122071	MURICA	MURICATRUE	1	0.743954	111	0.900289	0.306306	0.500955	-0.216221	0.661993	-0.326622
Oral	X6_159659	BMI_CAT	BMI_CAToverweight	1	0.744103	379	0.998718	0.538259	1.38997	0.0733578	0.224731	0.326425
Urogenital tract	X6_49238	DSUBFED	DSUBFED	1	0.744192	64	0.677358	0.171875	1.19836	-0.197418	0.605007	-0.326307
Oral	X6_119756	MURICA	MURICATRUE	1	0.744373	379	0.835707	0.263852	0.512293	0.125372	0.384496	0.326068
Oral	X6_92037	OCPTN_ST	OCPTN_STTRUE	1	0.744419	77	0.490766	0.896104	1	-0.258725	0.793619	-0.326007
Gastrointestinal tract	X6_131335	MURICA	MURICATRUE	1	0.744451	111	0.745871	0.207207	0.500955	0.265808	0.81545	0.325964
Gastrointestinal tract	X6_189038	MURICA	MURICATRUE	1	0.744712	111	1	0.459459	0.500955	-0.199752	0.613451	-0.32562
Gastrointestinal tract	X6_37664	BMI_CAT	BMI_CATobese	1	0.744786	111	0.877715	0.711712	1.43492	0.211427	0.649502	0.325521
Gastrointestinal tract	X7_125528	BMI_CAT	BMI_CAToverweight	1	0.745083	111	0.889288	0.297297	1.43492	0.154147	0.47411	0.32513
Oral	X6_85714	MURICA	MURICATRUE	1	0.745223	379	0.996383	0.451187	0.512293	0.107269	0.330113	0.324945
Oral	X6_105225	BMI_CAT	BMI_CATobese	1	0.745681	379	0.961591	0.379947	1.38997	0.110633	0.341103	0.32434
Oral	X6_67816	BMI_CAT	BMI_CATobese	1	0.745799	379	0.923537	0.335092	1.38997	-0.116598	0.359665	-0.324184
Oral	X6_24671	EDLVL_BS	EDLVL_BSTRUE	1	0.748071	44	0.903424	0.295455	0.903424	-0.25086	0.781047	-0.321184
Airways	X6_53818	BMI_CAT	BMI_CAToverweight	1	0.748501	92	0.567788	0.130435	1.44118	0.211556	0.659842	0.320617
Gastrointestinal tract	X6_141836	OCPTN_ST	OCPTN_STTRUE	1	0.748871	46	0.937734	0.326087	1	-0.211309	0.660076	-0.320128
Gastrointestinal tract	X6_153601	BMI_CAT	BMI_CAToverweight	1	0.748921	111	0.889288	0.297297	1.43492	0.142885	0.44643	0.320062
Gastrointestinal tract	X6_88033	DCMCODE_13	DCMCODE_13TRUE	1	0.749564	46	0.688113	0.173913	0.688113	-0.3703	1.16004	-0.319215
Gastrointestinal tract	X6_203385	DCMCODE_13	DCMCODE_13TRUE	1	0.749564	46	0.688113	0.826087	0.688113	0.3703	1.16004	0.319215
Gastrointestinal tract	X6_185741	BMI_CAT	BMI_CAToverweight	1	0.749685	111	0.442807	0.0900901	1.43492	0.225892	0.708003	0.319055
Gastrointestinal tract	X6_41475	MURICA	MURICATRUE	1	0.750364	111	1	0.531532	0.500955	0.196805	0.618572	0.318159
Gastrointestinal tract	X6_211540	BMI_CAT	BMI_CAToverweight	1	0.750531	111	0.999951	0.45045	1.43492	0.135723	0.426885	0.317939
Oral	X6_196036	DSUBFED	DSUBFED	1	0.750665	365	0.967905	0.610959	1.31047	-0.0570888	0.179659	-0.317762
Gastrointestinal tract	X6_98921	BMI_CAT	BMI_CATobese	1	0.750711	111	0.961888	0.369369	1.43492	-0.196288	0.617837	-0.317703
Urogenital tract	X6_44338	BMI_CAT	BMI_CAToverweight	1	0.751106	64	0.34554	0.0625	1.45931	0.343635	1.0834	0.317182
Gastrointestinal tract	X6_72839	DCMCODE_13	DCMCODE_13TRUE	1	0.751218	46	0.937734	0.673913	0.688113	-0.258016	0.813845	-0.317034
Oral	X6_199978	DCMCODE_13	DCMCODE_13TRUE	1	0.75197	80	0.970205	0.625	0.621261	-0.204793	0.647991	-0.316043
Oral	X6_119084	OCPTN_ST	OCPTN_STTRUE	1	0.752086	77	0.895917	0.298701	1	-0.16318	0.516573	-0.31589
Oral	X6_49238	OCPTN_ST	OCPTN_STTRUE	1	0.752086	77	0.895917	0.298701	1	-0.16318	0.516573	-0.31589
Oral	X6_154791	EDLVL_BS	EDLVL_BSTRUE	1	0.752255	44	1	0.454545	0.903424	-0.23122	0.73248	-0.315667
Gastrointestinal tract	X6_118862	OCPTN_ST	OCPTN_STTRUE	1	0.752402	46	0.885327	0.717391	1	0.223726	0.709173	0.315474
Oral	X6_92251	DCMCODE_13	DCMCODE_13TRUE	1	0.752538	80	0.588521	0.1375	0.621261	0.269198	0.853799	0.315295
Gastrointestinal tract	X6_158611	BMI_CAT	BMI_CAToverweight	1	0.753055	111	0.865561	0.720721	1.43492	0.147623	0.469219	0.314614
Gastrointestinal tract	X6_77230	DSUBFED	DSUBFED	1	0.753149	108	0.564191	0.87037	1.18299	0.176653	0.561713	0.31449
Urogenital tract	X6_60213	BMI_CAT	BMI_CAToverweight	1	0.75386	64	0.405114	0.078125	1.45931	0.46678	1.48867	0.313554
Oral	X6_27154	BMI_CAT	BMI_CAToverweight	1	0.754868	379	0.955795	0.372032	1.38997	0.0721113	0.230958	0.312226
Oral	X6_182765	OCPTN_ST	OCPTN_STTRUE	1	0.75504	77	0.861125	0.272727	1	-0.168124	0.538858	-0.312
Oral	X6_122071	MURICA	MURICATRUE	1	0.75525	379	0.770873	0.224274	0.512293	-0.120831	0.387622	-0.311724
Oral	X6_109255	DCMCODE_13	DCMCODE_13TRUE	1	0.755328	80	0.735226	0.2	0.621261	-0.258868	0.83071	-0.311622
Oral	X6_62025	OCPTN_ST	OCPTN_STTRUE	1	0.756312	77	0.776065	0.779221	1	-0.186402	0.60066	-0.310328
Oral	X6_119084	EDLVL_BS	EDLVL_BSTRUE	1	0.757169	44	0.872595	0.272727	0.903424	-0.24777	0.801327	-0.3092
Oral	X6_135880	DCMCODE_13	DCMCODE_13TRUE	1	0.757789	80	0.735226	0.2	0.621261	-0.256889	0.83301	-0.308386
Oral	X6_210706	DSUBFED	DSUBFED	1	0.759728	365	0.838641	0.734247	1.31047	-0.0598456	0.195677	-0.305839
Oral	X6_91527	DSUDIET	DSUDIET	1	0.761641	365	0.949959	0.364384	0.222786	-0.0935135	0.308293	-0.303326
Oral	X6_39457	DSUDIET	DSUDIET	1	0.765919	365	0.99671	0.547945	0.222786	-0.0854615	0.287056	-0.297717
Oral	X6_58175	BMI_CAT	BMI_CATobese	1	0.766308	379	0.557688	0.129288	1.38997	-0.144045	0.484662	-0.297208
Gastrointestinal tract	X6_55806	MURICA	MURICATRUE	1	0.76631	111	0.998813	0.441441	0.500955	0.187457	0.630733	0.297205
Oral	X7_102617	OCPTN_ST	OCPTN_STTRUE	1	0.768428	77	0.998001	0.428571	1	0.141277	0.479829	0.294432
Gastrointestinal tract	X6_157252	BMI_CAT	BMI_CATobese	1	0.769687	111	0.865561	0.720721	1.43492	-0.182579	0.623596	-0.292785
Oral	X6_122071	DSUBFED	DSUBFED	1	0.769812	365	0.751513	0.213699	1.31047	0.0651203	0.222541	0.292621
Oral	X6_179701	BMI_CAT	BMI_CAToverweight	1	0.77014	379	0.928679	0.340369	1.38997	0.0681638	0.233284	0.292192
Oral	X6_105925	MURICA	MURICATRUE	1	0.770441	379	0.843442	0.269129	0.512293	-0.106314	0.364343	-0.291798
Oral	X6_63870	BMI_CAT	BMI_CATobese	1	0.770668	379	0.966999	0.387863	1.38997	-0.102533	0.35174	-0.291502
Oral	X6_128085	MURICA	MURICATRUE	1	0.771484	379	0.999956	0.472296	0.512293	0.0952955	0.328113	0.290435
Airways	X6_90240	BMI_CAT	BMI_CAToverweight	1	0.771618	92	0.262466	0.0434783	1.44118	-0.36277	1.24981	-0.29026
Airways	X6_107860	BMI_CAT	BMI_CAToverweight	1	0.771618	92	0.262466	0.0434783	1.44118	-0.36277	1.24981	-0.29026
Oral	X7_81985	DSUBFED	DSUBFED	1	0.7717	365	0.998533	0.460274	1.31047	0.0511314	0.176223	0.290152
Gastrointestinal tract	X6_119084	DSUBFED	DSUBFED	1	0.772323	108	0.836711	0.259259	1.18299	-0.121213	0.418932	-0.289337
Oral	X6_26486	EDLVL_BS	EDLVL_BSTRUE	1	0.772753	44	0.99756	0.590909	0.903424	0.219748	0.760966	0.288775
Airways	X6_164274	BMI_CAT	BMI_CATobese	1	0.772776	92	0.469748	0.0978261	1.44118	0.271796	0.941297	0.288746
Gastrointestinal tract	X6_139150	OCPTN_ST	OCPTN_STTRUE	1	0.773443	46	0.818534	0.23913	1	0.20844	0.724065	0.287875
Oral	X6_93460	BMI_CAT	BMI_CAToverweight	1	0.774199	379	0.928679	0.340369	1.38997	-0.0691886	0.24117	-0.286887
Oral	X6_70847	OCPTN_ST	OCPTN_STTRUE	1	0.774201	77	0.799368	0.233766	1	-0.160329	0.558862	-0.286884
Gastrointestinal tract	X6_119084	OCPTN_ST	OCPTN_STTRUE	1	0.774296	46	0.885327	0.282609	1	-0.198584	0.69251	-0.28676
Gastrointestinal tract	X6_76803	OCPTN_ST	OCPTN_STTRUE	1	0.774296	46	0.885327	0.282609	1	-0.198584	0.69251	-0.28676
Oral	X6_177609	DSUBFED	DSUBFED	1	0.774437	365	0.976255	0.40274	1.31047	-0.0522967	0.182488	-0.286576
Oral	X6_155466	DSUDIET	DSUDIET	1	0.774488	365	0.653737	0.167123	0.222786	-0.112912	0.394094	-0.28651
Gastrointestinal tract	X6_85013	DCMCODE_13	DCMCODE_13TRUE	1	0.774561	46	1	0.456522	0.688113	0.22434	0.783273	0.286414
Oral	X6_90845	EDLVL_BS	EDLVL_BSTRUE	1	0.774683	44	0.755304	0.204545	0.903424	0.273463	0.955315	0.286255
Gastrointestinal tract	X6_211540	OCPTN_ST	OCPTN_STTRUE	1	0.774948	46	1	0.478261	1	-0.176289	0.616592	-0.285909
Urogenital tract	X6_62357	BMI_CAT	BMI_CATobese	1	0.776227	64	0.509889	0.109375	1.45931	0.372776	1.31149	0.284239
Airways	X6_62357	BMI_CAT	BMI_CATobese	1	0.776266	92	0.78728	0.228261	1.44118	-0.21851	0.768889	-0.284189
Gastrointestinal tract	X6_42014	OCPTN_ST	OCPTN_STTRUE	1	0.777081	46	0.266976	0.956522	1	-0.426438	1.50618	-0.283125
Airways	X6_146554	DSUBFED	DSUBFED	1	0.777872	88	0.159384	0.0227273	1.36952	0.276976	0.981857	0.282094
Oral	X6_26906	EDLVL_BS	EDLVL_BSTRUE	1	0.778009	44	0.528495	0.886364	0.903424	-0.355378	1.26059	-0.281914
Oral	X6_159048	EDLVL_BS	EDLVL_BSTRUE	1	0.778009	44	0.528495	0.113636	0.903424	0.355378	1.26059	0.281914
[truncated: 1,577 more rows]

## Sheet: HMP Body Subsite Associations
HMP_BodySubsite	FUNKID	PHENONAME	Coeff_Name	p_adj_fdr	p_value	N_samples	FF_Entropy_bits	FF_PercentPresent	PH_Entropy_bits	Estimate	Std_Err	z_value
NA	X6_143839	MURICA	MURICATRUE	1	0.000846266	111	0.709098	0.189189	0.500955	-2.24169	0.671726	-3.3372
NA	X6_80255	BMI_CAT	BMI_CAToverweight	1	0.000952363	111	0.889288	0.297297	1.43492	1.58161	0.478663	3.30423
Supragingival plaque	X6_205407	MURICA	MURICATRUE	1	0.00106459	120	0.834192	0.741667	0.501139	2.1262	0.649644	3.27288
NA	X6_152703	BMI_CAT	BMI_CAToverweight	1	0.00299005	111	0.76316	0.216216	1.43492	1.62575	0.547618	2.96876
NA	X6_189038	BMI_CAT	BMI_CAToverweight	1	0.00396624	111	1	0.459459	1.43492	1.26217	0.438128	2.88083
NA	X6_141836	MURICA	MURICATRUE	1	0.00403648	111	0.865561	0.279279	0.500955	-1.8945	0.658887	-2.8753
Tongue dorsum	X6_69531	OCPTN_ST	OCPTN_STTRUE	1	0.00444447	32	0.987957	0.375	0.999666	-4.20062	1.47662	-2.84476
Tongue dorsum	X6_99853	BMI_CAT	BMI_CATobese	1	0.00493876	128	0.400306	0.921875	1.37968	-3.83945	1.36587	-2.811
NA	X6_149008	BMI_CAT	BMI_CATobese	1	0.00573342	111	1	0.459459	1.43492	2.26558	0.820076	2.76265
Supragingival plaque	X6_30726	MURICA	MURICATRUE	1	0.00575085	120	0.447653	0.0916667	0.501139	-2.14265	0.775857	-2.76166
NA	X6_104327	DSUBFED	DSUBFED	1	0.00611537	108	0.720396	0.805556	1.18299	1.49975	0.547047	2.74153
Tongue dorsum	X6_65847	BMI_CAT	BMI_CAToverweight	1	0.00646711	128	0.571749	0.132812	1.37968	1.62711	0.597519	2.72311
NA	X6_150369	DSUBFED	DSUBFED	1	0.00663558	108	0.807018	0.759259	1.18299	1.33518	0.491852	2.7146
NA	X7_214048	DSUBFED	DSUBFED	1	0.0069195	108	0.975908	0.611111	1.18299	1.1602	0.429595	2.70069
NA	X6_37664	DCMCODE_13	DCMCODE_13TRUE	1	0.00713298	46	0.77935	0.782609	0.688113	-2.36301	0.878257	-2.69057
Supragingival plaque	X6_138416	MURICA	MURICATRUE	1	0.00722403	120	0.447653	0.0916667	0.501139	-2.00287	0.745577	-2.68634
Supragingival plaque	X6_213963	OCPTN_ST	OCPTN_STTRUE	1	0.00738217	23	0.97934	0.347826	1	-3.93559	1.469	-2.67909
Supragingival plaque	X6_39457	BMI_CAT	BMI_CAToverweight	1	0.00748076	120	0.901845	0.691667	1.41039	-1.20519	0.450597	-2.67465
Buccal mucosa	X6_70847	DSUBFED	DSUBFED	1	0.00779432	113	0.466752	0.0973451	1.30913	1.63808	0.615621	2.66085
Tongue dorsum	X6_211583	BMI_CAT	BMI_CAToverweight	1	0.00820456	128	0.887278	0.703125	1.37968	1.24424	0.470674	2.64353
Supragingival plaque	X6_49496	MURICA	MURICATRUE	1	0.00834583	120	0.71363	0.191667	0.501139	-1.70676	0.647052	-2.63775
Tongue dorsum	X6_65847	DSUBFED	DSUBFED	1	0.00886751	124	0.583576	0.137097	1.27848	1.38652	0.52979	2.61712
Tongue dorsum	X6_90240	BMI_CAT	BMI_CATobese	1	0.00909136	128	0.427837	0.914062	1.37968	-3.4012	1.30384	-2.6086
NA	X6_210288	BMI_CAT	BMI_CAToverweight	1	0.00910911	111	0.625998	0.153153	1.43492	-2.79068	1.07007	-2.60793
Supragingival plaque	X6_85519	DSUDIET	DSUDIET	1	0.0091304	117	0.817925	0.247863	0.258144	1.45142	0.556712	2.60713
Tongue dorsum	X7_107714	OCPTN_ST	OCPTN_STTRUE	1	0.0108581	32	0.847418	0.25	0.999666	3.56657	1.40017	2.54723
NA	X6_183699	DSUBFED	DSUBFED	1	0.0111074	108	0.636757	0.157407	1.18299	1.34166	0.52836	2.5393
Supragingival plaque	X6_154692	BMI_CAT	BMI_CAToverweight	1	0.0111346	120	0.419124	0.916667	1.41039	-2.73371	1.07692	-2.53845
NA	X7_213859	BMI_CAT	BMI_CAToverweight	1	0.0113213	111	0.974651	0.612613	1.43492	1.18063	0.466168	2.53262
Tongue dorsum	X6_98858	BMI_CAT	BMI_CAToverweight	1	0.0118634	128	0.454231	0.09375	1.37968	1.81329	0.720652	2.51618
Tongue dorsum	X6_184881	BMI_CAT	BMI_CATobese	1	0.0120367	128	0.906029	0.3125	1.37968	1.65868	0.660547	2.51107
Supragingival plaque	X6_36193	DSUBFED	DSUBFED	1	0.0131456	117	0.4267	0.0854701	1.28041	1.56198	0.629882	2.4798
NA	X6_73558	DCMCODE_13	DCMCODE_13TRUE	1	0.0133232	46	0.937734	0.673913	0.688113	-2.23814	0.904295	-2.47501
Supragingival plaque	X6_85714	BMI_CAT	BMI_CATobese	1	0.0134446	120	0.965286	0.625	1.41039	-1.6119	0.652122	-2.47177
Posterior fornix	X6_160917	BMI_CAT	BMI_CATobese	1	0.0140297	59	0.973577	0.372881	1.46579	2.32637	0.947027	2.4565
NA	X7_213859	OCPTN_ST	OCPTN_STTRUE	1	0.0141027	46	0.958712	0.652174	1	1.91188	0.778887	2.45464
Tongue dorsum	X6_190669	BMI_CAT	BMI_CATobese	1	0.0145694	128	0.427837	0.914062	1.37968	-2.39923	0.982119	-2.44291
NA	X6_77027	OCPTN_ST	OCPTN_STTRUE	1	0.0154847	46	1	0.456522	1	1.68841	0.697446	2.42084
NA	X6_133809	BMI_CAT	BMI_CATobese	1	0.0155186	111	0.954704	0.36036	1.43492	1.49347	0.617125	2.42004
Buccal mucosa	X6_154692	BMI_CAT	BMI_CATobese	1	0.0156506	116	1	0.534483	1.3928	-1.9922	0.824258	-2.41696
Buccal mucosa	X6_111258	OCPTN_ST	OCPTN_STTRUE	1	0.0156699	22	1	0.454545	1	-3.04452	1.25988	-2.41651
Buccal mucosa	X6_85044	DSUBFED	DSUBFED	1	0.0158209	113	0.547679	0.123894	1.30913	1.30704	0.541661	2.41302
NA	X6_57750	BMI_CAT	BMI_CAToverweight	1	0.016542	111	1	0.540541	1.43492	1.05144	0.438698	2.39673
Supragingival plaque	X6_30726	DSUDIET	DSUDIET	1	0.0166844	117	0.455622	0.0940171	0.258144	1.35056	0.56424	2.39359
Supragingival plaque	X6_26906	BMI_CAT	BMI_CAToverweight	1	0.017214	120	0.677298	0.825	1.41039	-1.39779	0.586787	-2.38211
Tongue dorsum	X6_91527	DSUBFED	DSUBFED	1	0.0173642	124	0.998739	0.556452	1.27848	0.822959	0.34594	2.3789
NA	X6_63487	MURICA	MURICATRUE	1	0.017524	111	0.669225	0.171171	0.500955	-1.61533	0.679987	-2.37552
Supragingival plaque	X6_17925	OCPTN_ST	OCPTN_STTRUE	1	0.0176012	23	0.999762	0.391304	1	-2.49197	1.04973	-2.3739
Tongue dorsum	X6_119756	BMI_CAT	BMI_CAToverweight	1	0.0179867	128	1	0.515625	1.37968	0.925782	0.391303	2.36589
Tongue dorsum	X6_173979	EDLVL_BS	EDLVL_BSTRUE	1	0.0180049	19	1	0.421053	0.996792	-3.30739	1.39817	-2.36552
Tongue dorsum	X6_113953	DSUDIET	DSUDIET	1	0.018406	124	0.700192	0.814516	0.24689	-1.44521	0.613068	-2.35735
Supragingival plaque	X6_61652	BMI_CAT	BMI_CAToverweight	1	0.0185797	120	0.920481	0.325	1.41039	-1.14193	0.485132	-2.35386
Supragingival plaque	X6_173979	BMI_CAT	BMI_CAToverweight	1	0.0197673	120	0.971161	0.616667	1.41039	-0.962315	0.412881	-2.33073
Tongue dorsum	X6_129689	BMI_CAT	BMI_CAToverweight	1	0.0206022	128	0.704263	0.1875	1.37968	1.15195	0.497562	2.3152
Tongue dorsum	X6_159659	DCMCODE_13	DCMCODE_13TRUE	1	0.0211153	33	0.714727	0.818182	0.641541	-2.57587	1.11707	-2.30592
NA	X6_71475	BMI_CAT	BMI_CAToverweight	1	0.0213192	111	0.910727	0.684685	1.43492	-1.05789	0.459498	-2.30228
NA	X6_165403	BMI_CAT	BMI_CAToverweight	1	0.0213229	111	0.76316	0.216216	1.43492	1.17968	0.512412	2.30222
Supragingival plaque	X7_102617	BMI_CAT	BMI_CAToverweight	1	0.0214634	120	0.999796	0.45	1.41039	-0.977122	0.424885	-2.29973
Supragingival plaque	X6_65847	MURICA	MURICATRUE	1	0.0237279	120	0.526265	0.116667	0.501139	-1.60616	0.710215	-2.26151
Tongue dorsum	X6_196633	MURICA	MURICATRUE	1	0.0243432	128	0.807761	0.757812	0.52739	1.41264	0.627376	2.25167
NA	X6_181184	DSUBFED	DSUBFED	1	0.0245946	108	0.680311	0.175926	1.18299	-1.17371	0.522182	-2.24771
Posterior fornix	X6_25913	BMI_CAT	BMI_CAToverweight	1	0.0249059	59	0.538976	0.118644	1.46579	2.72143	1.21337	2.24286
Supragingival plaque	X6_56668	MURICA	MURICATRUE	1	0.0254331	120	0.881291	0.291667	0.501139	-1.40327	0.627928	-2.23476
Supragingival plaque	X6_49947	BMI_CAT	BMI_CAToverweight	1	0.0254831	120	0.821115	0.75	1.41039	-1.04937	0.469727	-2.234
NA	X6_105476	OCPTN_ST	OCPTN_STTRUE	1	0.025767	46	1	0.456522	1	-1.49403	0.670057	-2.22971
NA	X6_85013	BMI_CAT	BMI_CATobese	1	0.0258088	111	1	0.468468	1.43492	1.43871	0.645427	2.22908
Nares	X6_109238	MURICA	MURICATRUE	1	0.0259732	92	0.210925	0.0326087	0.504173	-3.37008	1.51355	-2.22661
Nares	X6_97267	MURICA	MURICATRUE	1	0.0259732	92	0.210925	0.0326087	0.504173	-3.37008	1.51355	-2.22661
Supragingival plaque	X6_205297	OCPTN_ST	OCPTN_STTRUE	1	0.0260111	23	1	0.521739	1	-2.67401	1.20124	-2.22605
NA	X6_42014	BMI_CAT	BMI_CAToverweight	1	0.026785	111	0.411615	0.918919	1.43492	-1.84378	0.832544	-2.21464
NA	X6_75391	DSUBFED	DSUBFED	1	0.0269238	108	0.658986	0.166667	1.18299	1.11829	0.505416	2.21262
NA	X6_27580	BMI_CAT	BMI_CATobese	1	0.0270033	111	1	0.459459	1.43492	1.37389	0.621256	2.21147
NA	X6_44338	BMI_CAT	BMI_CATobese	1	0.0270497	111	0.980219	0.603604	1.43492	2.36243	1.06858	2.2108
Supragingival plaque	X6_26906	BMI_CAT	BMI_CATobese	1	0.0277686	120	0.677298	0.825	1.41039	-1.72775	0.785146	-2.20054
NA	X6_194092	OCPTN_ST	OCPTN_STTRUE	1	0.0286371	46	0.989588	0.608696	1	1.54045	0.703899	2.18845
NA	X6_205736	OCPTN_ST	OCPTN_STTRUE	1	0.0286371	46	0.989588	0.608696	1	1.54045	0.703899	2.18845
Supragingival plaque	X6_103923	DSUBFED	DSUBFED	1	0.0287616	117	0.627298	0.153846	1.28041	-1.19214	0.545168	-2.18674
Tongue dorsum	X6_153897	DSUDIET	DSUDIET	1	0.0288241	124	0.38017	0.927419	0.24689	-1.10565	0.505812	-2.18588
Supragingival plaque	X6_61652	OCPTN_ST	OCPTN_STTRUE	1	0.0292845	23	0.97934	0.347826	1	-2.3779	1.09096	-2.17963
Supragingival plaque	X6_205407	DSUDIET	DSUDIET	1	0.0305837	117	0.831474	0.74359	0.258144	-1.24106	0.573914	-2.16245
Supragingival plaque	X6_119756	BMI_CAT	BMI_CATobese	1	0.0306871	120	0.695803	0.183333	1.41039	1.44146	0.667003	2.16111
Supragingival plaque	X6_105225	BMI_CAT	BMI_CAToverweight	1	0.0308844	120	0.595951	0.141667	1.41039	-2.29458	1.06301	-2.15856
Tongue dorsum	X6_92260	DSUDIET	DSUDIET	1	0.0313454	124	0.561525	0.870968	0.24689	-1.11704	0.518914	-2.15266
Supragingival plaque	X6_37895	BMI_CAT	BMI_CAToverweight	1	0.032005	120	0.389264	0.925	1.41039	-1.79061	0.835038	-2.14435
Tongue dorsum	X6_36135	MURICA	MURICATRUE	1	0.0321786	128	0.704263	0.1875	0.52739	-1.55841	0.727486	-2.14219
Buccal mucosa	X6_57018	OCPTN_ST	OCPTN_STTRUE	1	0.032188	22	1	0.5	1	-2.63906	1.23201	-2.14207
Buccal mucosa	X6_61889	MURICA	MURICATRUE	1	0.0322383	116	0.962422	0.62931	0.53827	1.28398	0.599588	2.14144
Tongue dorsum	X6_159261	DSUBFED	DSUBFED	1	0.0322413	124	0.749656	0.209677	1.27848	0.953122	0.445092	2.14141
Nares	X6_127818	MURICA	MURICATRUE	1	0.0326096	92	0.309787	0.0543478	0.504173	-2.77825	1.30016	-2.13686
NA	X6_90887	BMI_CAT	BMI_CATobese	1	0.0335516	111	0.52813	0.117117	1.43492	1.49955	0.705533	2.12542
Supragingival plaque	X6_24671	BMI_CAT	BMI_CAToverweight	1	0.0348289	120	1	0.525	1.41039	-0.875123	0.414683	-2.11034
Supragingival plaque	X6_119084	DSUBFED	DSUBFED	1	0.0348584	117	0.901356	0.307692	1.28041	0.81566	0.386569	2.11
Supragingival plaque	X6_85714	BMI_CAT	BMI_CAToverweight	1	0.0352095	120	0.965286	0.625	1.41039	-0.919307	0.43653	-2.10594
NA	X6_57620	BMI_CAT	BMI_CAToverweight	1	0.0355741	111	0.779748	0.225225	1.43492	-1.2689	0.603732	-2.10176
Buccal mucosa	X6_179701	DSUBFED	DSUBFED	1	0.0359993	113	0.406404	0.079646	1.30913	-1.41935	0.676869	-2.09694
Supragingival plaque	X6_44703	DSUBFED	DSUBFED	1	0.0360932	117	0.559619	0.128205	1.28041	1.25265	0.597674	2.09588
NA	X6_174427	BMI_CAT	BMI_CAToverweight	1	0.0363123	111	0.689564	0.18018	1.43492	1.10374	0.527242	2.09341
Supragingival plaque	X6_55806	DSUDIET	DSUDIET	1	0.0364028	117	0.559619	0.128205	0.258144	1.11709	0.533881	2.0924
Supragingival plaque	X6_26486	BMI_CAT	BMI_CAToverweight	1	0.0364863	120	0.944938	0.65	1.41039	-0.925218	0.442378	-2.09147
Buccal mucosa	X6_72839	OCPTN_ST	OCPTN_STTRUE	1	0.0371174	22	1	0.409091	1	-2.19722	1.05409	-2.08447
Tongue dorsum	X6_149008	DSUDIET	DSUDIET	1	0.0375312	124	0.664101	0.830645	0.24689	-0.997721	0.479688	-2.07994
Tongue dorsum	X6_36135	DSUDIET	DSUDIET	1	0.0376833	124	0.700192	0.185484	0.24689	1.24855	0.600759	2.07828
Tongue dorsum	X6_103418	DSUBFED	DSUBFED	1	0.0379378	124	0.409475	0.0806452	1.27848	-1.29904	0.625883	-2.07553
NA	X6_85444	BMI_CAT	BMI_CAToverweight	1	0.0381331	111	0.669225	0.828829	1.43492	-1.14701	0.553197	-2.07342
NA	X6_205736	DCMCODE_13	DCMCODE_13TRUE	1	0.038307	46	0.989588	0.608696	0.688113	-1.84535	0.890803	-2.07155
Tongue dorsum	X6_174007	BMI_CAT	BMI_CAToverweight	1	0.0384038	128	0.704263	0.1875	1.37968	1.04839	0.50634	2.07052
Supragingival plaque	X6_94538	DSUBFED	DSUBFED	1	0.0389563	117	0.559619	0.128205	1.28041	-1.2613	0.610901	-2.06465
Supragingival plaque	X6_109255	OCPTN_ST	OCPTN_STTRUE	1	0.0399739	23	0.97934	0.347826	1	-2.0858	1.01547	-2.05402
Supragingival plaque	X6_184628	OCPTN_ST	OCPTN_STTRUE	1	0.0408807	23	0.878239	0.26087	1	-2.54362	1.24398	-2.04474
Supragingival plaque	X6_30161	OCPTN_ST	OCPTN_STTRUE	1	0.0409038	23	0.999762	0.391304	1	-2.57319	1.25859	-2.0445
Tongue dorsum	X6_105925	DCMCODE_13	DCMCODE_13TRUE	1	0.0411804	33	0.77847	0.212121	0.641541	2.23778	1.09603	2.04171
Tongue dorsum	X6_113993	DCMCODE_13	DCMCODE_13TRUE	1	0.0411804	33	0.77847	0.787879	0.641541	-2.23778	1.09603	-2.04171
NA	X7_53884	BMI_CAT	BMI_CATobese	1	0.0415026	111	0.500955	0.891892	1.43492	-1.61007	0.789842	-2.03847
Tongue dorsum	X6_105476	BMI_CAT	BMI_CATobese	1	0.0416923	128	0.454231	0.09375	1.37968	1.57592	0.773806	2.03658
Buccal mucosa	X6_211583	DSUBFED	DSUBFED	1	0.0417592	113	0.494909	0.106195	1.30913	1.26358	0.620645	2.03591
Tongue dorsum	X6_88025	EDLVL_BS	EDLVL_BSTRUE	1	0.0420477	19	0.996792	0.368421	0.996792	-2.36292	1.16225	-2.03305
Buccal mucosa	X6_63870	DSUBFED	DSUBFED	1	0.0429215	113	0.755728	0.212389	1.30913	-0.850988	0.42035	-2.02447
Supragingival plaque	X6_97267	DSUBFED	DSUBFED	1	0.0441736	117	1	0.504274	1.28041	-0.686298	0.341028	-2.01244
NA	X6_97267	BMI_CAT	BMI_CATobese	1	0.0442132	111	0.442807	0.0900901	1.43492	1.9452	0.966768	2.01206
NA	X6_75391	BMI_CAT	BMI_CAToverweight	1	0.0443204	111	0.648049	0.162162	1.43492	1.16236	0.577987	2.01105
Supragingival plaque	X6_118674	BMI_CAT	BMI_CAToverweight	1	0.0444049	120	0.98601	0.591667	1.41039	-0.862175	0.42889	-2.01025
Nares	X6_188170	DSUBFED	DSUBFED	1	0.0446904	88	0.159384	0.0227273	1.36952	-3.45452	1.72076	-2.00756
Nares	X6_56657	DSUBFED	DSUBFED	1	0.0446904	88	0.159384	0.0227273	1.36952	-3.45452	1.72076	-2.00756
Nares	X6_65847	DSUBFED	DSUBFED	1	0.0446904	88	0.159384	0.0227273	1.36952	-3.45452	1.72076	-2.00756
NA	X6_27580	BMI_CAT	BMI_CAToverweight	1	0.04486	111	1	0.459459	1.43492	0.868481	0.432949	2.00597
Supragingival plaque	X6_199448	OCPTN_ST	OCPTN_STTRUE	1	0.0453657	23	1	0.565217	1	-2.40667	1.20259	-2.00125
Supragingival plaque	X6_61889	MURICA	MURICATRUE	1	0.0456525	120	0.999796	0.55	0.501139	1.30042	0.65067	1.99859
Supragingival plaque	X6_65847	DSUDIET	DSUDIET	1	0.0457079	117	0.535213	0.119658	0.258144	1.01955	0.510267	1.99808
NA	X6_208248	BMI_CAT	BMI_CATobese	1	0.04604	111	0.825497	0.252252	1.43492	1.19786	0.600422	1.99503
Supragingival plaque	X6_199263	DSUBFED	DSUBFED	1	0.046087	117	0.396409	0.0769231	1.28041	1.30502	0.654277	1.9946
Buccal mucosa	X6_26486	OCPTN_ST	OCPTN_STTRUE	1	0.0464105	22	0.954434	0.318182	1	-2.12026	1.06458	-1.99164
Buccal mucosa	X6_159659	OCPTN_ST	OCPTN_STTRUE	1	0.0464105	22	0.954434	0.318182	1	-2.12026	1.06458	-1.99164
NA	X6_208248	DSUBFED	DSUBFED	1	0.0470208	108	0.836711	0.259259	1.18299	0.85765	0.431823	1.98611
Nares	X6_213320	BMI_CAT	BMI_CAToverweight	1	0.0472038	92	0.433354	0.0869565	1.44118	2.2909	1.15442	1.98447
Supragingival plaque	X6_24671	OCPTN_ST	OCPTN_STTRUE	1	0.0474457	23	1	0.478261	1	-2.37911	1.20018	-1.9823
Buccal mucosa	X6_44338	BMI_CAT	BMI_CATobese	1	0.0475151	116	1	0.474138	1.3928	-1.62967	0.822368	-1.98168
NA	X6_77027	BMI_CAT	BMI_CATobese	1	0.0476707	111	0.989654	0.414414	1.43492	-1.59364	0.80475	-1.98029
Buccal mucosa	X6_117494	BMI_CAT	BMI_CATobese	1	0.0479139	116	1	0.543103	1.3928	-1.43519	0.725528	-1.97813
Supragingival plaque	X6_99002	DSUBFED	DSUBFED	1	0.0480543	117	1	0.512821	1.28041	-0.68997	0.349018	-1.97689
Tongue dorsum	X6_85545	OCPTN_ST	OCPTN_STTRUE	1	0.0482918	32	0.987957	0.625	0.999666	1.8727	0.948304	1.97479
Tongue dorsum	X6_173132	BMI_CAT	BMI_CATobese	1	0.0483616	128	0.86681	0.28125	1.37968	1.26481	0.640676	1.97418
NA	X6_146554	BMI_CAT	BMI_CAToverweight	1	0.0487714	111	0.852814	0.72973	1.43492	1.03355	0.524487	1.97058
NA	X6_140225	BMI_CAT	BMI_CAToverweight	1	0.0489447	111	0.500955	0.891892	1.43492	-1.29004	0.655149	-1.96907
NA	X6_149327	BMI_CAT	BMI_CAToverweight	1	0.049648	111	0.52813	0.882883	1.43492	-1.28875	0.656527	-1.96298
NA	X6_76246	BMI_CAT	BMI_CAToverweight	1	0.0499198	111	0.442807	0.90991	1.43492	-1.65891	0.846104	-1.96065
Tongue dorsum	X6_91953	BMI_CAT	BMI_CAToverweight	1	0.0499597	128	0.86681	0.28125	1.37968	-0.88328	0.450582	-1.96031
NA	X6_49947	BMI_CAT	BMI_CAToverweight	1	0.0499943	111	0.472547	0.900901	1.43492	-1.42834	0.728741	-1.96001
Tongue dorsum	X6_209274	DSUBFED	DSUBFED	1	0.0507421	124	0.700192	0.185484	1.27848	0.81353	0.416415	1.95365
NA	X6_150972	DSUBFED	DSUBFED	1	0.0507703	108	0.564191	0.87037	1.18299	1.18955	0.608961	1.95342
Buccal mucosa	X6_202842	BMI_CAT	BMI_CATobese	1	0.0514008	116	1	0.5	1.3928	-1.42149	0.729671	-1.94812
NA	X6_135930	DSUBFED	DSUBFED	1	0.0514993	108	0.419717	0.916667	1.18299	1.46467	0.752158	1.9473
Supragingival plaque	X6_144816	DSUDIET	DSUDIET	1	0.0515563	117	0.706161	0.188034	0.258144	0.933272	0.479383	1.94682
Supragingival plaque	X6_91527	OCPTN_ST	OCPTN_STTRUE	1	0.0515812	23	0.97934	0.347826	1	2.34812	1.20626	1.94661
Buccal mucosa	X6_122071	BMI_CAT	BMI_CAToverweight	1	0.0519532	116	0.586296	0.137931	1.3928	-1.32605	0.68229	-1.94352
Nares	X6_26906	MURICA	MURICATRUE	1	0.0519739	92	0.210925	0.0326087	0.504173	-2.50844	1.29078	-1.94335
Tongue dorsum	X6_39457	BMI_CAT	BMI_CATobese	1	0.0520424	128	0.877262	0.710938	1.37968	-1.23735	0.636895	-1.94278
NA	X6_85774	OCPTN_ST	OCPTN_STTRUE	1	0.0520543	46	0.818534	0.76087	1	1.71399	0.88228	1.94268
Retroauricular crease	X6_42014	DSUBFED	DSUBFED	1	0.0526568	23	0.70964	0.173913	1.55818	2.50018	1.29027	1.93772
Retroauricular crease	X6_165971	DSUBFED	DSUBFED	1	0.0526568	23	0.70964	0.173913	1.55818	2.50018	1.29027	1.93772
Posterior fornix	X6_60213	BMI_CAT	BMI_CATobese	1	0.0527521	59	0.367108	0.0677966	1.46579	2.48491	1.2829	1.93694
Supragingival plaque	X6_84465	BMI_CAT	BMI_CAToverweight	1	0.0529445	120	0.447653	0.908333	1.41039	-1.39667	0.721655	-1.93537
Retroauricular crease	X6_92260	DSUBFED	DSUBFED	1	0.0530197	23	0.70964	0.173913	1.55818	3.04452	1.57359	1.93476
Tongue dorsum	X6_90481	DSUDIET	DSUDIET	1	0.053787	124	0.857296	0.725806	0.24689	-1.12414	0.582892	-1.92855
Buccal mucosa	X6_156982	MURICA	MURICATRUE	1	0.0538228	116	0.974547	0.612069	0.53827	-1.53224	0.794623	-1.92826
Nares	X6_190669	DSUBFED	DSUBFED	1	0.0539779	88	0.218415	0.0340909	1.36952	2.48917	1.29172	1.92701
Buccal mucosa	X6_105225	BMI_CAT	BMI_CAToverweight	1	0.0547792	116	0.792653	0.232759	1.3928	-1.01009	0.525919	-1.92062
NA	X6_118674	OCPTN_ST	OCPTN_STTRUE	1	0.0550116	46	0.735986	0.804348	1	1.7756	0.925378	1.91878
Supragingival plaque	X6_202312	DSUBFED	DSUBFED	1	0.0551111	117	0.687563	0.179487	1.28041	0.898059	0.468227	1.918
Tongue dorsum	X6_41475	BMI_CAT	BMI_CATobese	1	0.0552145	128	0.427837	0.0859375	1.37968	1.71846	0.896345	1.91718
Supragingival plaque	X6_90845	BMI_CAT	BMI_CATobese	1	0.055286	120	1	0.466667	1.41039	-1.27037	0.662819	-1.91662
Buccal mucosa	X7_21650	BMI_CAT	BMI_CAToverweight	1	0.0553818	116	0.398856	0.0775862	1.3928	1.6001	0.835182	1.91587
Supragingival plaque	X6_103412	OCPTN_ST	OCPTN_STTRUE	1	0.0554321	23	1	0.565217	1	-1.93538	1.01039	-1.91547
Supragingival plaque	X6_63870	OCPTN_ST	OCPTN_STTRUE	1	0.0554321	23	1	0.565217	1	-1.93538	1.01039	-1.91547
Buccal mucosa	X6_129689	BMI_CAT	BMI_CAToverweight	1	0.0554431	116	0.366896	0.0689655	1.3928	1.64746	0.860118	1.91539
NA	X6_155466	BMI_CAT	BMI_CATobese	1	0.0555167	111	0.648049	0.162162	1.43492	1.30934	0.683798	1.91481
NA	X6_42437	OCPTN_ST	OCPTN_STTRUE	1	0.0559815	46	0.635305	0.847826	1	2.22919	1.1664	1.91118
Nares	X6_161782	OCPTN_ST	OCPTN_STTRUE	1	0.0564786	19	0.996792	0.631579	1	-2.3961	1.25626	-1.90732
NA	X6_152703	OCPTN_ST	OCPTN_STTRUE	1	0.056794	46	0.77935	0.217391	1	1.5572	0.817475	1.90489
Tongue dorsum	X6_173132	BMI_CAT	BMI_CAToverweight	1	0.0568195	128	0.86681	0.28125	1.37968	0.825811	0.433566	1.9047
Nares	X6_103412	MURICA	MURICATRUE	1	0.0568336	92	0.504173	0.108696	0.504173	-1.62225	0.851759	-1.90459
Supragingival plaque	X6_113993	BMI_CAT	BMI_CAToverweight	1	0.0568647	120	0.999796	0.55	1.41039	-0.805716	0.423093	-1.90435
Buccal mucosa	X6_27154	OCPTN_ST	OCPTN_STTRUE	1	0.0572874	22	0.823617	0.227273	1	-2.3979	1.26131	-1.90111
Tongue dorsum	X6_37895	DSUBFED	DSUBFED	1	0.057457	124	0.807634	0.241935	1.27848	-0.822454	0.432912	-1.89982
Buccal mucosa	X6_61889	BMI_CAT	BMI_CAToverweight	1	0.0576847	116	0.962422	0.62931	1.3928	-0.783092	0.412569	-1.89809
NA	X6_118862	MURICA	MURICATRUE	1	0.0579742	111	0.968538	0.621622	0.500955	-2.02305	1.06707	-1.89589
NA	X6_145397	BMI_CAT	BMI_CATobese	1	0.0588161	111	0.996554	0.567568	1.43492	1.32002	0.698582	1.88957
Supragingival plaque	X6_44703	BMI_CAT	BMI_CAToverweight	1	0.0588501	120	0.550406	0.125	1.41039	1.21884	0.645126	1.88931
NA	X6_147771	OCPTN_ST	OCPTN_STTRUE	1	0.0589323	46	0.688113	0.173913	1	1.74672	0.924827	1.8887
Tongue dorsum	X6_199978	DSUBFED	DSUBFED	1	0.0593262	124	1	0.508065	1.27848	0.634738	0.336594	1.88577
Tongue dorsum	X6_208903	DSUDIET	DSUDIET	1	0.0597839	124	0.917555	0.677419	0.24689	-1.07466	0.570903	-1.88238
Tongue dorsum	X6_53818	DSUDIET	DSUDIET	1	0.0602125	124	0.645055	0.16129	0.24689	0.981609	0.522345	1.87923
Supragingival plaque	X6_91527	MURICA	MURICATRUE	1	0.0603591	120	1	0.475	0.501139	-1.23285	0.656411	-1.87816
Nares	X6_61956	BMI_CAT	BMI_CAToverweight	1	0.0605409	92	0.353708	0.0652174	1.44118	2.10558	1.12188	1.87683
Retroauricular crease	X6_161782	DSUBFED	DSUBFED	1	0.0605876	23	1	0.478261	1.55818	-2.4186	1.2889	-1.87649
NA	X6_146554	MURICA	MURICATRUE	1	0.0606471	111	0.852814	0.72973	0.500955	1.17885	0.628363	1.87606
Supragingival plaque	X7_81985	MURICA	MURICATRUE	1	0.0607724	120	0.965286	0.625	0.501139	1.14323	0.609674	1.87515
Tongue dorsum	X6_61652	BMI_CAT	BMI_CATobese	1	0.0619118	128	0.736519	0.796875	1.37968	-1.27379	0.682292	-1.86693
Nares	X6_52811	BMI_CAT	BMI_CATobese	1	0.0619628	92	0.504173	0.108696	1.44118	1.86992	1.0018	1.86656
Tongue dorsum	X6_85774	OCPTN_ST	OCPTN_STTRUE	1	0.0625345	32	0.792288	0.21875	0.999666	-2.30061	1.23524	-1.86249
Buccal mucosa	X6_93460	BMI_CAT	BMI_CAToverweight	1	0.0625534	116	0.630657	0.155172	1.3928	1.08077	0.580325	1.86235
NA	X6_120400	MURICA	MURICATRUE	1	0.0629124	111	0.996554	0.567568	0.500955	-1.49292	0.802727	-1.85981
Tongue dorsum	X6_33024	DSUBFED	DSUBFED	1	0.0633808	124	0.733764	0.201613	1.27848	-0.761038	0.409929	-1.85651
Tongue dorsum	X6_56043	MURICA	MURICATRUE	1	0.0633882	128	0.479575	0.898438	0.52739	1.29061	0.695198	1.85646
Supragingival plaque	X6_107012	BMI_CAT	BMI_CAToverweight	1	0.0634808	120	0.550406	0.125	1.41039	-1.4815	0.798304	-1.85581
Supragingival plaque	X6_93460	MURICA	MURICATRUE	1	0.0636561	120	0.998498	0.558333	0.501139	-1.32069	0.712124	-1.85458
Buccal mucosa	X6_190669	BMI_CAT	BMI_CATobese	1	0.0641345	116	1	0.534483	1.3928	-1.33738	0.722423	-1.85124
NA	X6_199642	BMI_CAT	BMI_CATobese	1	0.0642849	111	0.554155	0.126126	1.43492	1.42381	0.769543	1.8502
Supragingival plaque	X7_102617	BMI_CAT	BMI_CATobese	1	0.0644047	120	0.999796	0.45	1.41039	1.29521	0.700351	1.84937
Nares	X6_148764	MURICA	MURICATRUE	1	0.065523	92	0.924792	0.326087	0.504173	-1.31085	0.711773	-1.84167
Tongue dorsum	X6_125450	DSUDIET	DSUDIET	1	0.0655461	124	0.664101	0.830645	0.24689	-0.920703	0.49997	-1.84152
Tongue dorsum	X6_196036	BMI_CAT	BMI_CATobese	1	0.0659996	128	0.887278	0.296875	1.37968	1.32362	0.719975	1.83843
Posterior fornix	X6_36135	BMI_CAT	BMI_CAToverweight	1	0.0669709	59	0.538976	0.118644	1.46579	1.72883	0.943753	1.83187
Nares	X6_96390	MURICA	MURICATRUE	1	0.0670086	92	0.353708	0.0652174	0.504173	-1.96203	1.0712	-1.83162
Supragingival plaque	X6_135314	OCPTN_ST	OCPTN_STTRUE	1	0.0671463	23	0.802859	0.217391	1	-2.34822	1.2827	-1.83069
Supragingival plaque	X6_173132	OCPTN_ST	OCPTN_STTRUE	1	0.0671463	23	0.802859	0.217391	1	-2.34822	1.2827	-1.83069
NA	X6_128085	BMI_CAT	BMI_CAToverweight	1	0.0677126	111	0.985228	0.405405	1.43492	-0.832066	0.455449	-1.82691
NA	X6_56715	MURICA	MURICATRUE	1	0.0679365	111	0.442807	0.0900901	0.500955	-1.42858	0.782598	-1.82543
Retroauricular crease	X6_148764	DSUBFED	DSUBFED	1	0.0679984	23	0.937186	0.304348	1.55818	-2.2043	1.20782	-1.82502
NA	X6_123414	BMI_CAT	BMI_CATobese	1	0.0682625	111	1	0.468468	1.43492	1.11231	0.610066	1.82327
Tongue dorsum	X6_63870	DSUBFED	DSUBFED	1	0.0685283	124	1	0.532258	1.27848	0.592029	0.32502	1.82152
Tongue dorsum	X6_26486	BMI_CAT	BMI_CAToverweight	1	0.0689521	128	0.52739	0.882812	1.37968	1.46268	0.804229	1.81873
Tongue dorsum	X6_37924	EDLVL_BS	EDLVL_BSTRUE	1	0.0699096	19	0.958712	0.684211	0.996792	-2.82099	1.55641	-1.8125
NA	X6_39471	DSUBFED	DSUBFED	1	0.0701071	108	0.757272	0.787037	1.18299	0.960009	0.530035	1.81122
Tongue dorsum	X6_179701	MURICA	MURICATRUE	1	0.0713097	128	0.991712	0.421875	0.52739	1.22051	0.676747	1.8035
Buccal mucosa	X6_199448	BMI_CAT	BMI_CATobese	1	0.0713271	116	0.962422	0.37069	1.3928	-1.49285	0.827805	-1.80339
Nares	X6_30726	DSUBFED	DSUBFED	1	0.0716877	88	0.218415	0.0340909	1.36952	-2.77064	1.53831	-1.8011
Nares	X6_67001	DSUBFED	DSUBFED	1	0.0716877	88	0.218415	0.0340909	1.36952	-2.77064	1.53831	-1.8011
Tongue dorsum	X6_146554	DSUDIET	DSUDIET	1	0.0718913	124	0.941677	0.653226	0.24689	-1.02675	0.57048	-1.79981
Supragingival plaque	X6_63870	DSUBFED	DSUBFED	1	0.0720136	117	0.994505	0.42735	1.28041	-0.673015	0.374099	-1.79903
Nares	X6_107496	DSUBFED	DSUBFED	1	0.0725447	88	0.271564	0.0454545	1.36952	1.89282	1.05409	1.79568
Nares	X6_92939	DSUBFED	DSUBFED	1	0.0725447	88	0.271564	0.0454545	1.36952	1.89282	1.05409	1.79568
Nares	X6_118862	DSUBFED	DSUBFED	1	0.0725447	88	0.271564	0.0454545	1.36952	1.89282	1.05409	1.79568
Tongue dorsum	X6_49238	EDLVL_BS	EDLVL_BSTRUE	1	0.0731396	19	0.958712	0.315789	0.996792	-2.29186	1.27897	-1.79196
NA	X6_90688	BMI_CAT	BMI_CATobese	1	0.0732878	111	0.900289	0.693694	1.43492	1.92251	1.07341	1.79103
NA	X6_202842	BMI_CAT	BMI_CAToverweight	1	0.0734462	111	0.648049	0.837838	1.43492	1.21793	0.680391	1.79005
NA	X6_56347	BMI_CAT	BMI_CAToverweight	1	0.0735466	111	0.727858	0.801802	1.43492	-0.934931	0.522476	-1.78942
Supragingival plaque	X6_30161	BMI_CAT	BMI_CAToverweight	1	0.0737472	120	0.971161	0.383333	1.41039	-0.799555	0.447134	-1.78818
Tongue dorsum	X6_58175	BMI_CAT	BMI_CATobese	1	0.074161	128	0.86681	0.28125	1.37968	-1.91868	1.07452	-1.78562
Tongue dorsum	X6_119756	BMI_CAT	BMI_CATobese	1	0.0741686	128	1	0.515625	1.37968	1.16744	0.653817	1.78557
Tongue dorsum	X6_184881	DCMCODE_13	DCMCODE_13TRUE	1	0.0743281	33	0.881291	0.272727	0.641541	2.01585	1.12959	1.78459
Tongue dorsum	X6_98858	OCPTN_ST	OCPTN_STTRUE	1	0.0745526	32	0.728333	0.1875	0.999666	2.15398	1.20793	1.78321
NA	X6_111812	MURICA	MURICATRUE	1	0.0748344	111	0.472547	0.900901	0.500955	1.36751	0.767626	1.78148
Tongue dorsum	X6_67816	OCPTN_ST	OCPTN_STTRUE	1	0.0753789	32	0.987957	0.375	0.999666	-1.65095	0.928465	-1.77815
Supragingival plaque	X6_56668	BMI_CAT	BMI_CAToverweight	1	0.0754377	120	0.881291	0.291667	1.41039	-0.852088	0.479295	-1.77779
Buccal mucosa	X6_153897	BMI_CAT	BMI_CATobese	1	0.0755374	116	0.777348	0.775862	1.3928	-1.20203	0.676364	-1.77719
NA	X6_65847	DCMCODE_13	DCMCODE_13TRUE	1	0.0755802	46	1	0.456522	0.688113	-2.02749	1.14101	-1.77693
NA	X6_89989	DSUBFED	DSUBFED	1	0.075672	108	1	0.472222	1.18299	0.680101	0.38286	1.77637
Nares	X6_92260	DSUBFED	DSUBFED	1	0.0757098	88	0.218415	0.0340909	1.36952	2.13029	1.19939	1.77614
Tongue dorsum	X6_92260	BMI_CAT	BMI_CATobese	1	0.0765106	128	0.549977	0.875	1.37968	-1.59303	0.899355	-1.7713
NA	X6_149008	OCPTN_ST	OCPTN_STTRUE	1	0.0766435	46	0.998196	0.413043	1	-1.17839	0.665566	-1.7705
Tongue dorsum	X6_62357	EDLVL_BS	EDLVL_BSTRUE	1	0.0767283	19	1	0.421053	0.996792	-1.9568	1.10554	-1.76999
NA	X6_98694	OCPTN_ST	OCPTN_STTRUE	1	0.0768797	46	0.913278	0.304348	1	-1.34078	0.757896	-1.76908
Supragingival plaque	X6_109255	DSUBFED	DSUBFED	1	0.0770727	117	0.901356	0.307692	1.28041	0.669401	0.378636	1.76793
Tongue dorsum	X6_154692	DSUDIET	DSUDIET	1	0.0770881	124	0.437496	0.91129	0.24689	-0.893068	0.505176	-1.76784
Supragingival plaque	X6_63487	BMI_CAT	BMI_CAToverweight	1	0.0771264	120	0.617448	0.15	1.41039	-1.21384	0.686712	-1.76761
Buccal mucosa	X6_199978	BMI_CAT	BMI_CATobese	1	0.0772005	116	0.955627	0.362069	1.3928	-1.9113	1.08156	-1.76717
NA	X6_110310	DCMCODE_13	DCMCODE_13TRUE	1	0.0783952	46	1	0.434783	0.688113	-1.97705	1.12327	-1.76007
Supragingival plaque	X6_213360	BMI_CAT	BMI_CATobese	1	0.0785923	120	1	0.541667	1.41039	1.25397	0.712926	1.75891
NA	X6_95845	OCPTN_ST	OCPTN_STTRUE	1	0.078597	46	0.937734	0.673913	1	1.27328	0.723916	1.75889
NA	X6_17925	DCMCODE_13	DCMCODE_13TRUE	1	0.0788202	46	0.958712	0.652174	0.688113	-1.4458	0.822613	-1.75757
Tongue dorsum	X6_58645	BMI_CAT	BMI_CAToverweight	1	0.0788568	128	0.855917	0.726562	1.37968	-0.772786	0.439743	-1.75736
Supragingival plaque	X6_174007	OCPTN_ST	OCPTN_STTRUE	1	0.0790572	23	0.937186	0.304348	1	-1.81131	1.03139	-1.75618
Buccal mucosa	X6_139150	DSUBFED	DSUBFED	1	0.0797826	113	0.985925	0.40708	1.30913	-0.601105	0.343106	-1.75195
NA	X6_149008	DCMCODE_13	DCMCODE_13TRUE	1	0.0799563	46	0.998196	0.413043	0.688113	-1.99847	1.14137	-1.75094
Supragingival plaque	X6_60213	BMI_CAT	BMI_CAToverweight	1	0.080264	120	0.870278	0.283333	1.41039	-0.832392	0.475882	-1.74916
Supragingival plaque	X6_29169	DSUDIET	DSUDIET	1	0.0806112	117	0.945588	0.350427	0.258144	0.870906	0.498472	1.74715
Tongue dorsum	X6_184881	MURICA	MURICATRUE	1	0.0807546	128	0.906029	0.3125	0.52739	1.39481	0.798715	1.74632
Buccal mucosa	X6_125450	MURICA	MURICATRUE	1	0.0812297	116	0.968729	0.62069	0.53827	-1.38254	0.792925	-1.7436
Supragingival plaque	X6_118674	OCPTN_ST	OCPTN_STTRUE	1	0.0814761	23	1	0.521739	1	-2.07302	1.18989	-1.74219
Supragingival plaque	X6_26486	OCPTN_ST	OCPTN_STTRUE	1	0.0814761	23	1	0.521739	1	-2.07302	1.18989	-1.74219
Supragingival plaque	X6_153831	OCPTN_ST	OCPTN_STTRUE	1	0.0814761	23	1	0.521739	1	-2.07302	1.18989	-1.74219
NA	X6_59371	OCPTN_ST	OCPTN_STTRUE	1	0.0829874	46	0.77935	0.217391	1	1.37814	0.794955	1.73361
Tongue dorsum	X6_62357	BMI_CAT	BMI_CATobese	1	0.0833158	128	0.95872	0.367188	1.37968	-1.41182	0.815249	-1.73176
NA	X6_105916	MURICA	MURICATRUE	1	0.0835639	111	1	0.495495	0.500955	1.20733	0.697727	1.73037
Tongue dorsum	X6_58645	BMI_CAT	BMI_CATobese	1	0.0835947	128	0.855917	0.726562	1.37968	-1.1645	0.673042	-1.7302
Supragingival plaque	X6_25913	BMI_CAT	BMI_CATobese	1	0.0837442	120	0.821115	0.75	1.41039	-1.16694	0.674778	-1.72936
NA	X6_121134	OCPTN_ST	OCPTN_STTRUE	1	0.0838555	46	0.958712	0.652174	1	-1.14783	0.663969	-1.72874
NA	X6_107860	OCPTN_ST	OCPTN_STTRUE	1	0.0838555	46	0.958712	0.347826	1	1.14783	0.663969	1.72874
Buccal mucosa	X6_26906	BMI_CAT	BMI_CATobese	1	0.0845884	116	1	0.491379	1.3928	-1.24742	0.723283	-1.72466
Tongue dorsum	X6_94538	DSUBFED	DSUBFED	1	0.0848339	124	0.664101	0.169355	1.27848	-0.725711	0.421117	-1.7233
Tongue dorsum	X6_154791	BMI_CAT	BMI_CATobese	1	0.0857158	128	0.98436	0.40625	1.37968	-1.21494	0.706998	-1.71844
NA	X6_69531	BMI_CAT	BMI_CAToverweight	1	0.0860189	111	0.920609	0.324324	1.43492	0.753745	0.439045	1.71678
NA	X6_94538	BMI_CAT	BMI_CAToverweight	1	0.086199	111	0.929943	0.333333	1.43492	0.754999	0.440028	1.7158
NA	X6_184881	BMI_CAT	BMI_CATobese	1	0.0864075	111	0.839464	0.261261	1.43492	1.09129	0.636449	1.71466
Supragingival plaque	X6_99002	MURICA	MURICATRUE	1	0.0865751	120	1	0.5	0.501139	-1.12617	0.657141	-1.71375
NA	X6_116067	DCMCODE_13	DCMCODE_13TRUE	1	0.0869846	46	0.635305	0.847826	0.688113	-1.56514	0.914474	-1.71152
NA	X6_157252	OCPTN_ST	OCPTN_STTRUE	1	0.0873157	46	0.735986	0.804348	1	1.55601	0.910092	1.70973
Nares	X6_39471	DSUBFED	DSUBFED	1	0.0873578	88	0.271564	0.0454545	1.36952	1.64085	0.959837	1.7095
Posterior fornix	X6_107860	MURICA	MURICATRUE	1	0.0873702	59	0.219402	0.0338983	0.429645	-2.60478	1.52376	-1.70944
NA	X6_113649	MURICA	MURICATRUE	1	0.0881548	111	0.889288	0.702703	0.500955	1.08376	0.635555	1.70521
Posterior fornix	X6_177585	DSUBFED	DSUBFED	1	0.0887154	59	0.297758	0.0508475	1.06219	-2.16926	1.27438	-1.70221
NA	X6_44338	DCMCODE_13	DCMCODE_13TRUE	1	0.0889624	46	1	0.543478	0.688113	-1.50419	0.884351	-1.7009
Tongue dorsum	X6_158772	BMI_CAT	BMI_CATobese	1	0.0891873	128	0.736519	0.796875	1.37968	-1.25158	0.736354	-1.6997
Tongue dorsum	X6_60213	DSUBFED	DSUBFED	1	0.089203	124	0.409475	0.0806452	1.27848	0.974575	0.573408	1.69962
Tongue dorsum	X6_79208	DSUBFED	DSUBFED	1	0.089203	124	0.409475	0.0806452	1.27848	0.974575	0.573408	1.69962
Buccal mucosa	X6_159659	BMI_CAT	BMI_CAToverweight	1	0.0892935	116	0.792653	0.232759	1.3928	-0.91625	0.539245	-1.69914
Tongue dorsum	X6_53818	EDLVL_BS	EDLVL_BSTRUE	1	0.0894963	19	0.799049	0.210526	0.996792	-2.50904	1.47759	-1.69806
Tongue dorsum	X6_177585	BMI_CAT	BMI_CAToverweight	1	0.0895482	128	0.454231	0.09375	1.37968	-1.36114	0.801713	-1.69779
Buccal mucosa	X6_177609	BMI_CAT	BMI_CAToverweight	1	0.0900291	116	0.53827	0.12069	1.3928	-1.37529	0.811263	-1.69524
NA	X6_111812	DSUBFED	DSUBFED	1	0.0904933	108	0.45138	0.907407	1.18299	1.16418	0.687722	1.6928
Buccal mucosa	X6_118862	MURICA	MURICATRUE	1	0.090616	116	0.955627	0.637931	0.53827	-1.34123	0.792617	-1.69216
Retroauricular crease	X6_30143	DSUBFED	DSUBFED	1	0.0906304	23	0.97934	0.347826	1.55818	-1.61441	0.954097	-1.69208
Supragingival plaque	X6_70847	BMI_CAT	BMI_CATobese	1	0.0909914	120	0.965286	0.375	1.41039	1.04305	0.617119	1.69019
Tongue dorsum	X6_93460	MURICA	MURICATRUE	1	0.0912208	128	0.896865	0.304688	0.52739	-0.977523	0.578761	-1.68899
Retroauricular crease	X7_53884	DSUBFED	DSUBFED	1	0.0915912	23	0.802859	0.217391	1.55818	1.81754	1.07734	1.68706
Tongue dorsum	X6_155466	BMI_CAT	BMI_CATobese	1	0.0916815	128	1	0.46875	1.37968	1.11858	0.663218	1.68659
Tongue dorsum	X6_111258	DSUDIET	DSUDIET	1	0.0922384	124	0.700192	0.814516	0.24689	-0.848092	0.503705	-1.68371
Buccal mucosa	X6_84465	MURICA	MURICATRUE	1	0.0924804	116	0.992704	0.577586	0.53827	1.00349	0.596445	1.68246
Supragingival plaque	X6_211583	BMI_CAT	BMI_CAToverweight	1	0.0930484	120	0.958957	0.366667	1.41039	-0.816195	0.485966	-1.67953
Supragingival plaque	X6_99002	BMI_CAT	BMI_CAToverweight	1	0.0931363	120	1	0.5	1.41039	-0.697037	0.41513	-1.67908
NA	X6_39471	BMI_CAT	BMI_CAToverweight	1	0.0931368	111	0.745871	0.792793	1.43492	0.973491	0.579777	1.67908
Supragingival plaque	X7_76396	BMI_CAT	BMI_CAToverweight	1	0.0933709	120	0.573618	0.133333	1.41039	-1.14428	0.681978	-1.67788
Nares	X6_53818	DSUBFED	DSUBFED	1	0.0935475	88	0.584465	0.136364	1.36952	0.94109	0.561183	1.67697
Supragingival plaque	X6_116723	OCPTN_ST	OCPTN_STTRUE	1	0.0940394	23	0.878239	0.73913	1	-2.40706	1.43751	-1.67446
Tongue dorsum	X6_195894	DSUBFED	DSUBFED	1	0.0940516	124	0.899286	0.306452	1.27848	0.579349	0.346003	1.6744
Supragingival plaque	X6_119084	BMI_CAT	BMI_CATobese	1	0.0943782	120	0.920481	0.325	1.41039	-1.36538	0.816256	-1.67274
Tongue dorsum	X6_125450	DCMCODE_13	DCMCODE_13TRUE	1	0.0944991	33	0.641541	0.848485	0.641541	-2.22501	1.33064	-1.67213
NA	X6_97267	BMI_CAT	BMI_CAToverweight	1	0.0946653	111	0.442807	0.0900901	1.43492	1.44569	0.865015	1.67129
Nares	X6_165971	BMI_CAT	BMI_CAToverweight	1	0.0948037	92	0.724589	0.195652	1.44118	-1.08285	0.648189	-1.67058
Tongue dorsum	X6_61889	BMI_CAT	BMI_CAToverweight	1	0.0950608	128	0.549977	0.875	1.37968	-0.935696	0.560537	-1.66929
Supragingival plaque	X6_84465	DSUDIET	DSUDIET	1	0.0955341	117	0.455622	0.905983	0.258144	-0.84462	0.506701	-1.6669
NA	X6_84398	DCMCODE_13	DCMCODE_13TRUE	1	0.0964188	46	1	0.456522	0.688113	1.47786	0.888953	1.66247
NA	X6_196806	BMI_CAT	BMI_CAToverweight	1	0.0973304	111	0.825497	0.252252	1.43492	-0.875125	0.52784	-1.65794
Tongue dorsum	X6_138599	OCPTN_ST	OCPTN_STTRUE	1	0.0975215	32	0.847418	0.25	0.999666	1.61773	0.976309	1.65699
NA	X6_95845	BMI_CAT	BMI_CATobese	1	0.0977073	111	0.974651	0.612613	1.43492	-1.0124	0.611325	-1.65607
Tongue dorsum	X6_199978	OCPTN_ST	OCPTN_STTRUE	1	0.0983595	32	0.999666	0.59375	0.999666	-1.50591	0.911092	-1.65286
Supragingival plaque	X6_60213	OCPTN_ST	OCPTN_STTRUE	1	0.0983751	23	0.802859	0.217391	1	-2.044	1.2367	-1.65278
Tongue dorsum	X6_63870	DCMCODE_13	DCMCODE_13TRUE	1	0.0984724	33	1	0.575758	0.641541	-1.98278	1.20001	-1.6523
Tongue dorsum	X6_37924	DSUDIET	DSUDIET	1	0.0985561	124	0.934068	0.66129	0.24689	-0.955879	0.578656	-1.65189
Tongue dorsum	X6_188170	BMI_CAT	BMI_CAToverweight	1	0.0986199	128	0.704263	0.1875	1.37968	0.870518	0.527081	1.65158
NA	X6_85519	MURICA	MURICATRUE	1	0.0986478	111	0.500955	0.891892	0.500955	1.25614	0.76063	1.65144
Supragingival plaque	X6_118674	BMI_CAT	BMI_CATobese	1	0.0986504	120	0.98601	0.591667	1.41039	-1.05533	0.639039	-1.65143
NA	X6_134746	DSUBFED	DSUBFED	1	0.0987058	108	0.739221	0.796296	1.18299	0.784491	0.475115	1.65116
NA	X6_61652	BMI_CAT	BMI_CAToverweight	1	0.0988394	111	0.411615	0.918919	1.43492	1.79387	1.08686	1.65051
Retroauricular crease	X6_127818	OCPTN_ST	OCPTN_STTRUE	1	0.099165	13	1	0.461538	1	-2.30259	1.39642	-1.64892
Retroauricular crease	X6_52811	OCPTN_ST	OCPTN_STTRUE	1	0.099165	13	1	0.461538	1	-2.30259	1.39642	-1.64892
Retroauricular crease	X6_92939	OCPTN_ST	OCPTN_STTRUE	1	0.099165	13	1	0.461538	1	-2.30259	1.39642	-1.64892
Retroauricular crease	X6_25913	OCPTN_ST	OCPTN_STTRUE	1	0.099165	13	1	0.461538	1	2.30259	1.39642	1.64892
Supragingival plaque	X6_30726	BMI_CAT	BMI_CAToverweight	1	0.10015	120	0.447653	0.0916667	1.41039	-1.78268	1.08427	-1.64413
Tongue dorsum	X6_154791	BMI_CAT	BMI_CAToverweight	1	0.100379	128	0.98436	0.40625	1.37968	-0.646071	0.393222	-1.64302
Nares	X6_99853	DSUBFED	DSUBFED	1	0.100402	88	0.32029	0.0568182	1.36952	1.56233	0.950956	1.64291
NA	X6_57750	DSUBFED	DSUBFED	1	0.100731	108	1	0.537037	1.18299	-0.624495	0.380483	-1.64132
Tongue dorsum	X6_62025	DSUDIET	DSUDIET	1	0.101013	124	0.917555	0.677419	0.24689	-0.976927	0.595701	-1.63996
Supragingival plaque	X6_123660	BMI_CAT	BMI_CAToverweight	1	0.101017	120	0.573618	0.866667	1.41039	-0.936302	0.570936	-1.63994
NA	X6_187059	BMI_CAT	BMI_CAToverweight	1	0.101161	111	0.76316	0.783784	1.43492	0.925438	0.564549	1.63925
Supragingival plaque	X6_184627	BMI_CAT	BMI_CAToverweight	1	0.101325	120	0.71363	0.808333	1.41039	-0.855667	0.522237	-1.63847
Supragingival plaque	X6_53818	DSUBFED	DSUBFED	1	0.101353	117	0.605614	0.145299	1.28041	-0.835365	0.509888	-1.63833
Tongue dorsum	X6_146554	BMI_CAT	BMI_CAToverweight	1	0.101565	128	0.945676	0.648438	1.37968	-0.65385	0.399343	-1.63731
Nares	X6_52811	BMI_CAT	BMI_CAToverweight	1	0.101655	92	0.504173	0.108696	1.44118	1.447	0.883996	1.63688
Supragingival plaque	X6_113993	BMI_CAT	BMI_CATobese	1	0.101693	120	0.999796	0.55	1.41039	1.35712	0.829184	1.6367
Tongue dorsum	X6_144816	MURICA	MURICATRUE	1	0.102083	128	0.86681	0.28125	0.52739	-0.923736	0.565032	-1.63484
NA	X6_142856	MURICA	MURICATRUE	1	0.10257	111	1	0.522523	0.500955	-1.1405	0.698611	-1.63252
Buccal mucosa	X6_159261	DSUBFED	DSUBFED	1	0.103029	113	0.43729	0.0884956	1.30913	1.10661	0.678758	1.63034
Supragingival plaque	X6_173132	MURICA	MURICATRUE	1	0.103062	120	0.807497	0.241667	0.501139	-1.09659	0.672678	-1.63019
Supragingival plaque	X6_93460	BMI_CAT	BMI_CAToverweight	1	0.103102	120	0.998498	0.558333	1.41039	-0.674673	0.413911	-1.63
Supragingival plaque	X6_70847	OCPTN_ST	OCPTN_STTRUE	1	0.103598	23	0.97934	0.347826	1	-1.71586	1.05419	-1.62765
Buccal mucosa	X6_118862	OCPTN_ST	OCPTN_STTRUE	1	0.103605	22	1	0.545455	1	1.60944	0.988826	1.62762
NA	X6_57620	OCPTN_ST	OCPTN_STTRUE	1	0.103687	46	0.688113	0.173913	1	1.49507	0.918777	1.62723
NA	X6_75619	OCPTN_ST	OCPTN_STTRUE	1	0.103752	46	0.577004	0.130435	1	-1.9116	1.17497	-1.62693
NA	X6_137666	DSUBFED	DSUBFED	1	0.104238	108	0.510338	0.888889	1.18299	1.04677	0.644308	1.62465
NA	X6_196806	OCPTN_ST	OCPTN_STTRUE	1	0.104752	46	0.913278	0.304348	1	-1.19147	0.73446	-1.62224
Tongue dorsum	X6_36193	OCPTN_ST	OCPTN_STTRUE	1	0.105101	32	0.894393	0.28125	0.999666	-1.60783	0.992114	-1.62061
NA	X6_114478	DSUBFED	DSUBFED	1	0.105443	108	0.613582	0.148148	1.18299	-0.88118	0.544268	-1.61902
Buccal mucosa	X6_177585	DSUBFED	DSUBFED	1	0.105529	113	0.720476	0.19469	1.30913	0.696952	0.430584	1.61862
NA	X6_134746	BMI_CAT	BMI_CAToverweight	1	0.106583	111	0.745871	0.792793	1.43492	-0.79505	0.492674	-1.61375
Supragingival plaque	X6_144765	DSUDIET	DSUDIET	1	0.107247	117	0.803802	0.760684	0.258144	-0.766207	0.475701	-1.61069
Supragingival plaque	X6_85519	BMI_CAT	BMI_CAToverweight	1	0.108129	120	0.807497	0.241667	1.41039	-0.883456	0.549872	-1.60666
NA	X6_85013	DSUBFED	DSUBFED	1	0.108151	108	1	0.481481	1.18299	-0.611387	0.380557	-1.60656
Tongue dorsum	X6_26486	DCMCODE_13	DCMCODE_13TRUE	1	0.108271	33	0.641541	0.848485	0.641541	-1.82605	1.13701	-1.60602
Nares	X6_153897	DSUBFED	DSUBFED	1	0.109788	88	0.32029	0.0568182	1.36952	1.27044	0.794447	1.59914
Nares	X6_61956	DSUBFED	DSUBFED	1	0.109788	88	0.32029	0.0568182	1.36952	1.27044	0.794447	1.59914
Nares	X7_53884	MURICA	MURICATRUE	1	0.109921	92	0.153772	0.0217391	0.504173	-2.78483	1.7421	-1.59855
Tongue dorsum	X7_81985	EDLVL_BS	EDLVL_BSTRUE	1	0.109941	19	0.958712	0.315789	0.996792	-1.79176	1.12093	-1.59846
Tongue dorsum	X6_205297	MURICA	MURICATRUE	1	0.11067	128	1	0.484375	0.52739	0.987318	0.618934	1.59519
Supragingival plaque	X6_188170	OCPTN_ST	OCPTN_STTRUE	1	0.111069	23	1	0.521739	1	-1.54277	0.968223	-1.59341
Nares	X6_69184	BMI_CAT	BMI_CATobese	1	0.111151	92	0.262466	0.0434783	1.44118	2.05515	1.29008	1.59304
Buccal mucosa	X6_61652	BMI_CAT	BMI_CAToverweight	1	0.111394	116	0.366896	0.0689655	1.3928	-1.73668	1.09091	-1.59196
Tongue dorsum	X6_26759	BMI_CAT	BMI_CATobese	1	0.111569	128	0.931035	0.664062	1.37968	-0.989965	0.622158	-1.59118
Supragingival plaque	X6_213360	DSUBFED	DSUBFED	1	0.111948	117	0.999993	0.547009	1.28041	-0.541476	0.340658	-1.5895
Supragingival plaque	X6_42014	BMI_CAT	BMI_CATobese	1	0.112063	120	0.447653	0.0916667	1.41039	1.32821	0.835883	1.58899
Supragingival plaque	X6_188170	MURICA	MURICATRUE	1	0.112123	120	1	0.5	0.501139	-1.02188	0.643212	-1.58872
Buccal mucosa	X6_213360	BMI_CAT	BMI_CAToverweight	1	0.112526	116	0.398856	0.0775862	1.3928	-1.73165	1.09119	-1.58694
Tongue dorsum	X6_53818	OCPTN_ST	OCPTN_STTRUE	1	0.112706	32	0.728333	0.1875	0.999666	1.74395	1.09949	1.58615
Tongue dorsum	X6_184881	BMI_CAT	BMI_CAToverweight	1	0.113186	128	0.906029	0.3125	1.37968	0.677683	0.427822	1.58403
Tongue dorsum	X6_105925	OCPTN_ST	OCPTN_STTRUE	1	0.113665	32	0.792288	0.21875	0.999666	1.56641	0.990185	1.58193
NA	X7_125528	BMI_CAT	BMI_CATobese	1	0.114429	111	0.889288	0.297297	1.43492	0.963406	0.610294	1.57859
NA	X6_116571	BMI_CAT	BMI_CATobese	1	0.114438	111	1	0.468468	1.43492	-1.01421	0.642491	-1.57855
NA	X6_152703	BMI_CAT	BMI_CATobese	1	0.114474	111	0.76316	0.216216	1.43492	1.14681	0.726564	1.5784
Buccal mucosa	X6_36135	MURICA	MURICATRUE	1	0.115364	116	0.562766	0.12931	0.53827	-1.36536	0.867148	-1.57453
Nares	X6_148764	BMI_CAT	BMI_CAToverweight	1	0.115778	92	0.924792	0.326087	1.44118	0.764419	0.486041	1.57275
Tongue dorsum	X6_184360	BMI_CAT	BMI_CATobese	1	0.115874	128	0.877262	0.289062	1.37968	-1.30269	0.828513	-1.57233
Nares	X6_165971	BMI_CAT	BMI_CATobese	1	0.115931	92	0.724589	0.195652	1.44118	-1.7649	1.12265	-1.57208
Tongue dorsum	X6_59371	OCPTN_ST	OCPTN_STTRUE	1	0.116039	32	0.569406	0.125	0.999666	2.14236	1.36316	1.57162
Tongue dorsum	X6_61889	OCPTN_ST	OCPTN_STTRUE	1	0.116039	32	0.569406	0.875	0.999666	-2.14236	1.36316	-1.57162
Supragingival plaque	X6_60213	MURICA	MURICATRUE	1	0.116335	120	0.870278	0.283333	0.501139	1.66944	1.06311	1.57034
Tongue dorsum	X6_63870	EDLVL_BS	EDLVL_BSTRUE	1	0.11656	19	1	0.578947	0.996792	-1.96513	1.25217	-1.56938
Supragingival plaque	X6_213963	BMI_CAT	BMI_CAToverweight	1	0.116808	120	0.971161	0.383333	1.41039	-0.657464	0.419217	-1.56831
NA	X6_69531	OCPTN_ST	OCPTN_STTRUE	1	0.117344	46	1	0.456522	1	0.991343	0.633034	1.56602
Nares	X6_56043	BMI_CAT	BMI_CATobese	1	0.117422	92	0.309787	0.0543478	1.44118	2.02804	1.29531	1.56569
Nares	X6_81136	DSUBFED	DSUBFED	1	0.117949	88	0.32029	0.0568182	1.36952	-2.14852	1.37423	-1.56344
Nares	X6_61956	MURICA	MURICATRUE	1	0.118022	92	0.353708	0.0652174	0.504173	-1.56638	1.00208	-1.56313
Tongue dorsum	X6_197923	BMI_CAT	BMI_CATobese	1	0.118403	128	0.479575	0.898438	1.37968	-1.25869	0.80607	-1.56151
Tongue dorsum	X6_155466	DCMCODE_13	DCMCODE_13TRUE	1	0.118658	33	1	0.545455	0.641541	-1.96806	1.26123	-1.56043
Tongue dorsum	X6_32445	MURICA	MURICATRUE	1	0.119154	128	0.454231	0.09375	0.52739	-1.16803	0.749534	-1.55834
Tongue dorsum	X6_116723	BMI_CAT	BMI_CATobese	1	0.119356	128	0.807761	0.242188	1.37968	1.02776	0.659882	1.55748
NA	X6_139761	OCPTN_ST	OCPTN_STTRUE	1	0.119525	46	0.635305	0.152174	1	-1.78825	1.14869	-1.55677
Tongue dorsum	X6_49036	DSUBFED	DSUBFED	1	0.11991	124	0.409475	0.0806452	1.27848	-0.92663	0.595846	-1.55515
Retroauricular crease	X6_144884	OCPTN_ST	OCPTN_STTRUE	1	0.120263	13	0.970951	0.307692	1	-2.19722	1.41421	-1.55367
Retroauricular crease	X6_153897	OCPTN_ST	OCPTN_STTRUE	1	0.120263	13	0.970951	0.307692	1	-2.19722	1.41421	-1.55367
Retroauricular crease	X6_36135	OCPTN_ST	OCPTN_STTRUE	1	0.120263	13	1	0.615385	1	2.19722	1.41421	1.55367
Retroauricular crease	X6_39471	OCPTN_ST	OCPTN_STTRUE	1	0.120263	13	1	0.384615	1	-2.19722	1.41421	-1.55367
Retroauricular crease	X6_84465	OCPTN_ST	OCPTN_STTRUE	1	0.120263	13	0.970951	0.307692	1	-2.19722	1.41421	-1.55367
Buccal mucosa	X6_58645	BMI_CAT	BMI_CATobese	1	0.120691	116	0.974547	0.387931	1.3928	-1.28069	0.82525	-1.55188
Tongue dorsum	X6_144765	MURICA	MURICATRUE	1	0.120705	128	0.938556	0.34375	0.52739	1.23161	0.793657	1.55182
Buccal mucosa	X6_57018	BMI_CAT	BMI_CAToverweight	1	0.121319	116	0.988974	0.413793	1.3928	-0.637398	0.411421	-1.54926
Supragingival plaque	X6_177585	MURICA	MURICATRUE	1	0.121556	120	0.501139	0.108333	0.501139	-1.1622	0.750644	-1.54827
Tongue dorsum	X6_104115	DSUBFED	DSUBFED	1	0.121878	124	0.926029	0.669355	1.27848	0.526293	0.340216	1.54694
Supragingival plaque	X6_99002	DSUDIET	DSUDIET	1	0.122409	117	1	0.512821	0.258144	0.89378	0.578596	1.54474
NA	X6_211540	MURICA	MURICATRUE	1	0.122493	111	0.999951	0.45045	0.500955	1.09356	0.708083	1.54439
NA	X6_189038	OCPTN_ST	OCPTN_STTRUE	1	0.122991	46	1	0.478261	1	0.987991	0.64058	1.54234
NA	X7_125528	DCMCODE_13	DCMCODE_13TRUE	1	0.123161	46	0.97611	0.369565	0.688113	-1.75208	1.1365	-1.54164
Supragingival plaque	X6_92251	DSUBFED	DSUBFED	1	0.123346	117	0.937717	0.34188	1.28041	-0.539175	0.349913	-1.54088
Supragingival plaque	X6_41475	BMI_CAT	BMI_CAToverweight	1	0.12439	120	0.474961	0.1	1.41039	-1.24584	0.810776	-1.5366
Tongue dorsum	X6_17925	BMI_CAT	BMI_CATobese	1	0.124476	128	0.906029	0.3125	1.37968	0.952968	0.62032	1.53625
Tongue dorsum	X6_146554	OCPTN_ST	OCPTN_STTRUE	1	0.124563	32	0.965007	0.65625	0.999666	-1.41354	0.920333	-1.5359
Tongue dorsum	X6_149008	BMI_CAT	BMI_CAToverweight	1	0.124629	128	0.704263	0.8125	1.37968	0.775263	0.504849	1.53563
Buccal mucosa	X6_122071	OCPTN_ST	OCPTN_STTRUE	1	0.124897	22	0.898059	0.272727	1	-1.60944	1.04881	-1.53454
Buccal mucosa	X6_36135	OCPTN_ST	OCPTN_STTRUE	1	0.124897	22	0.898059	0.272727	1	-1.60944	1.04881	-1.53454
Tongue dorsum	X6_155466	OCPTN_ST	OCPTN_STTRUE	1	0.124918	32	1	0.53125	0.999666	1.44956	0.944677	1.53445
NA	X6_144436	OCPTN_ST	OCPTN_STTRUE	1	0.125037	46	0.913278	0.304348	1	1.10007	0.717137	1.53397
Tongue dorsum	X7_107714	BMI_CAT	BMI_CAToverweight	1	0.125101	128	0.844573	0.265625	1.37968	0.662368	0.431873	1.53371
Tongue dorsum	X7_102617	BMI_CAT	BMI_CATobese	1	0.126683	128	1	0.46875	1.37968	1.00118	0.655517	1.52731
Nares	X6_107346	DSUBFED	DSUBFED	1	0.126743	88	0.32029	0.0568182	1.36952	-1.62804	1.06612	-1.52707
Nares	X6_213320	BMI_CAT	BMI_CATobese	1	0.127001	92	0.433354	0.0869565	1.44118	1.99574	1.3078	1.52603
NA	X6_213905	BMI_CAT	BMI_CAToverweight	1	0.127031	111	0.709098	0.189189	1.43492	0.811631	0.531898	1.52592
Buccal mucosa	X6_92037	BMI_CAT	BMI_CAToverweight	1	0.127387	116	0.932319	0.663793	1.3928	0.65786	0.431528	1.52449
Tongue dorsum	X6_88025	MURICA	MURICATRUE	1	0.12758	128	0.794532	0.234375	0.52739	1.6164	1.06083	1.52372
NA	X6_97505	MURICA	MURICATRUE	1	0.127887	111	0.974651	0.612613	0.500955	-1.22706	0.805956	-1.52249
Nares	X6_71275	DSUBFED	DSUBFED	1	0.127962	88	0.218415	0.0340909	1.36952	-2.17454	1.42856	-1.52219
NA	X6_100105	BMI_CAT	BMI_CATobese	1	0.128363	111	0.920609	0.675676	1.43492	1.2315	0.80988	1.52059
Supragingival plaque	X6_59371	BMI_CAT	BMI_CAToverweight	1	0.128394	120	0.76326	0.216667	1.41039	-0.804288	0.528975	-1.52046
Supragingival plaque	X6_33024	MURICA	MURICATRUE	1	0.128591	120	0.793324	0.233333	0.501139	-0.965345	0.635229	-1.51968
Buccal mucosa	X6_210706	MURICA	MURICATRUE	1	0.128812	116	0.992704	0.422414	0.53827	1.04095	0.685373	1.5188
Nares	X6_39457	DSUBFED	DSUBFED	1	0.128984	88	0.365449	0.0681818	1.36952	-1.51174	0.995794	-1.51812
NA	X6_205736	DSUBFED	DSUBFED	1	0.12921	108	1	0.527778	1.18299	0.573335	0.377884	1.51723
NA	X6_122057	MURICA	MURICATRUE	1	0.129283	111	0.961888	0.369369	0.500955	1.22165	0.805343	1.51693
Tongue dorsum	X6_182765	DSUBFED	DSUBFED	1	0.129535	124	0.464339	0.0967742	1.27848	1.05441	0.695549	1.51594
Supragingival plaque	X6_30161	DSUDIET	DSUDIET	1	0.129589	117	0.977751	0.393162	0.258144	0.748553	0.493858	1.51572
Tongue dorsum	X6_159659	BMI_CAT	BMI_CAToverweight	1	0.129874	128	0.720675	0.804688	1.37968	0.762108	0.503175	1.5146
Retroauricular crease	X6_211583	DSUBFED	DSUBFED	1	0.130082	23	0.595609	0.130435	1.55818	1.87906	1.2413	1.51378
Retroauricular crease	X6_26906	DSUBFED	DSUBFED	1	0.130082	23	0.595609	0.130435	1.55818	1.87906	1.2413	1.51378
Retroauricular crease	X6_67001	DSUBFED	DSUBFED	1	0.130082	23	0.595609	0.130435	1.55818	1.87906	1.2413	1.51378
NA	X6_76246	DSUBFED	DSUBFED	1	0.130528	108	0.45138	0.907407	1.18299	0.999746	0.661197	1.51202
Buccal mucosa	X6_85044	BMI_CAT	BMI_CAToverweight	1	0.130636	116	0.586296	0.137931	1.3928	-0.933868	0.617801	-1.5116
NA	X6_33024	OCPTN_ST	OCPTN_STTRUE	1	0.130685	46	0.989588	0.608696	1	-0.997602	0.660048	-1.51141
NA	X6_31735	BMI_CAT	BMI_CAToverweight	1	0.13081	111	1	0.513514	1.43492	0.644243	0.426393	1.51091
Tongue dorsum	X7_81985	DSUBFED	DSUBFED	1	0.130913	124	0.941677	0.346774	1.27848	0.514566	0.340657	1.51051
Tongue dorsum	X6_144884	BMI_CAT	BMI_CAToverweight	1	0.131251	128	1	0.523438	1.37968	-0.614047	0.406872	-1.50919
Supragingival plaque	X6_77027	MURICA	MURICATRUE	1	0.131278	120	0.807497	0.241667	0.501139	-0.973902	0.64536	-1.50908
Supragingival plaque	X6_144765	DSUBFED	DSUBFED	1	0.131603	117	0.803802	0.760684	1.28041	0.583504	0.386988	1.50781
NA	X6_188170	BMI_CAT	BMI_CAToverweight	1	0.131935	111	0.968538	0.621622	1.43492	-0.645373	0.428387	-1.50652
NA	X6_85013	MURICA	MURICATRUE	1	0.132173	111	1	0.468468	0.500955	1.05198	0.698716	1.50559
Nares	X6_104120	DSUBFED	DSUBFED	1	0.132549	88	0.365449	0.0681818	1.36952	1.33694	0.888848	1.50413
Tongue dorsum	X6_61889	MURICA	MURICATRUE	1	0.13275	128	0.549977	0.875	0.52739	1.00562	0.668924	1.50335
Buccal mucosa	X6_67816	DSUBFED	DSUBFED	1	0.1328	113	0.572444	0.132743	1.30913	0.724725	0.482138	1.50315
Supragingival plaque	X6_24722	OCPTN_ST	OCPTN_STTRUE	1	0.132985	23	1	0.565217	1	-1.78943	1.19102	-1.50244
Supragingival plaque	X6_39457	OCPTN_ST	OCPTN_STTRUE	1	0.132985	23	1	0.565217	1	-1.78943	1.19102	-1.50244
Supragingival plaque	X6_72839	OCPTN_ST	OCPTN_STTRUE	1	0.132985	23	1	0.565217	1	-1.78943	1.19102	-1.50244
Buccal mucosa	X6_49238	BMI_CAT	BMI_CATobese	1	0.133375	116	0.691057	0.181034	1.3928	-1.67581	1.11652	-1.50092
Tongue dorsum	X6_139150	DSUDIET	DSUDIET	1	0.13342	124	0.625306	0.846774	0.24689	-0.725833	0.483646	-1.50075
Nares	X6_181184	MURICA	MURICATRUE	1	0.133833	92	0.806158	0.23913	0.504173	-1.10831	0.739293	-1.49916
Supragingival plaque	X6_24722	BMI_CAT	BMI_CAToverweight	1	0.134259	120	0.999796	0.55	1.41039	-0.650518	0.434398	-1.49752
Supragingival plaque	X6_36135	MURICA	MURICATRUE	1	0.134468	120	0.550406	0.125	0.501139	-1.16835	0.780612	-1.49671
Buccal mucosa	X6_39471	MURICA	MURICATRUE	1	0.135221	116	0.979869	0.603448	0.53827	0.873563	0.584783	1.49383
Buccal mucosa	X6_90097	BMI_CAT	BMI_CATobese	1	0.135338	116	0.691057	0.818966	1.3928	-1.08259	0.72493	-1.49338
NA	X6_161782	MURICA	MURICATRUE	1	0.135578	111	0.669225	0.171171	0.500955	-1.00836	0.675637	-1.49246
Supragingival plaque	X6_111258	OCPTN_ST	OCPTN_STTRUE	1	0.135661	23	0.878239	0.73913	1	-1.85044	1.24012	-1.49214
Nares	X6_81136	BMI_CAT	BMI_CATobese	1	0.13625	92	0.309787	0.0543478	1.44118	1.97408	1.32497	1.4899
Supragingival plaque	X6_159048	BMI_CAT	BMI_CATobese	1	0.136628	120	0.63815	0.158333	1.41039	1.05776	0.71064	1.48847
Posterior fornix	X6_30726	DSUBFED	DSUBFED	1	0.137035	59	0.538976	0.118644	1.06219	1.54239	1.0373	1.48692
NA	X6_17925	BMI_CAT	BMI_CATobese	1	0.137754	111	0.961888	0.630631	1.43492	1.0371	0.698755	1.48421
Supragingival plaque	X6_56668	OCPTN_ST	OCPTN_STTRUE	1	0.137903	23	0.878239	0.26087	1	-1.58998	1.07167	-1.48365
Tongue dorsum	X6_56668	BMI_CAT	BMI_CAToverweight	1	0.138198	128	0.651438	0.835938	1.37968	0.833292	0.562073	1.48253
NA	X6_148554	DSUBFED	DSUBFED	1	0.138262	108	0.481546	0.898148	1.18299	0.946084	0.638257	1.48229
Tongue dorsum	X6_208903	BMI_CAT	BMI_CATobese	1	0.138355	128	0.92311	0.671875	1.37968	-0.933844	0.630147	-1.48195
Buccal mucosa	X6_103412	OCPTN_ST	OCPTN_STTRUE	1	0.138691	22	0.730017	0.181818	1	-1.88707	1.27446	-1.48068
Buccal mucosa	X6_119084	OCPTN_ST	OCPTN_STTRUE	1	0.138691	22	0.730017	0.181818	1	-1.88707	1.27446	-1.48068
Buccal mucosa	X6_119756	OCPTN_ST	OCPTN_STTRUE	1	0.138691	22	0.730017	0.181818	1	-1.88707	1.27446	-1.48068
Buccal mucosa	X6_205297	OCPTN_ST	OCPTN_STTRUE	1	0.138691	22	0.730017	0.181818	1	-1.88707	1.27446	-1.48068
Buccal mucosa	X6_58175	OCPTN_ST	OCPTN_STTRUE	1	0.138691	22	0.730017	0.181818	1	-1.88707	1.27446	-1.48068
NA	X6_208248	BMI_CAT	BMI_CAToverweight	1	0.138732	111	0.825497	0.252252	1.43492	-0.839456	0.566997	-1.48053
Supragingival plaque	X6_122071	DSUBFED	DSUBFED	1	0.139051	117	0.891019	0.299145	1.28041	0.547134	0.369852	1.47933
Supragingival plaque	X6_39457	BMI_CAT	BMI_CATobese	1	0.139509	120	0.901845	0.691667	1.41039	-0.979977	0.663212	-1.47762
Tongue dorsum	X6_79208	BMI_CAT	BMI_CATobese	1	0.140563	128	0.400306	0.078125	1.37968	1.44976	0.983755	1.4737
NA	X7_147498	BMI_CAT	BMI_CATobese	1	0.140571	111	0.745871	0.207207	1.43492	-1.58844	1.07788	-1.47367
NA	X6_139761	MURICA	MURICATRUE	1	0.140797	111	0.689564	0.18018	0.500955	-0.996002	0.676251	-1.47283
Buccal mucosa	X6_25433	DSUBFED	DSUBFED	1	0.140885	113	0.373951	0.0707965	1.30913	-1.09032	0.740453	-1.4725
NA	X6_90929	BMI_CAT	BMI_CATobese	1	0.140998	111	0.795655	0.234234	1.43492	-1.58956	1.0798	-1.47208
NA	X6_72839	BMI_CAT	BMI_CATobese	1	0.14105	111	0.996554	0.567568	1.43492	0.942451	0.640299	1.47189
Tongue dorsum	X6_53818	MURICA	MURICATRUE	1	0.141243	128	0.651438	0.164062	0.52739	-0.998711	0.678852	-1.47118
NA	X6_91527	BMI_CAT	BMI_CAToverweight	1	0.141471	111	0.669225	0.171171	1.43492	0.820801	0.558241	1.47034
Posterior fornix	X6_84702	MURICA	MURICATRUE	1	0.141676	59	0.297758	0.0508475	0.429645	-2.01051	1.36809	-1.46958
NA	X6_183699	OCPTN_ST	OCPTN_STTRUE	1	0.142503	46	0.735986	0.195652	1	1.18958	0.811154	1.46653
NA	X6_137666	BMI_CAT	BMI_CATobese	1	0.142683	111	0.500955	0.891892	1.43492	-1.2247	0.835478	-1.46587
Nares	X6_181184	OCPTN_ST	OCPTN_STTRUE	1	0.142747	19	0.958712	0.315789	1	-1.82874	1.24774	-1.46564
Tongue dorsum	X6_49238	DSUDIET	DSUDIET	1	0.143467	124	0.779733	0.225806	0.24689	0.74418	0.508667	1.463
Posterior fornix	X6_44338	DSUBFED	DSUBFED	1	0.143688	59	0.367108	0.0677966	1.06219	1.96419	1.34331	1.4622
NA	X6_88033	BMI_CAT	BMI_CAToverweight	1	0.144548	111	0.689564	0.18018	1.43492	-0.899038	0.616175	-1.45906
Tongue dorsum	X6_213360	DSUDIET	DSUDIET	1	0.144968	124	0.717283	0.193548	0.24689	0.718343	0.492847	1.45754
Supragingival plaque	X6_209274	MURICA	MURICATRUE	1	0.145135	120	0.993447	0.575	0.501139	-1.00306	0.688472	-1.45693
Buccal mucosa	X6_85714	BMI_CAT	BMI_CAToverweight	1	0.145322	116	0.458349	0.0948276	1.3928	0.970113	0.666169	1.45626
Supragingival plaque	X6_212883	DSUBFED	DSUBFED	1	0.146103	117	0.966325	0.623932	1.28041	0.504308	0.346977	1.45343
Supragingival plaque	X6_142117	BMI_CAT	BMI_CATobese	1	0.146288	120	0.971161	0.383333	1.41039	-1.03786	0.7144	-1.45277
Supragingival plaque	X6_103412	MURICA	MURICATRUE	1	0.14662	120	0.999796	0.45	0.501139	-0.899103	0.619399	-1.45157
Supragingival plaque	X6_69531	MURICA	MURICATRUE	1	0.14662	120	0.999796	0.45	0.501139	-0.899103	0.619399	-1.45157
Tongue dorsum	X6_59371	DSUBFED	DSUBFED	1	0.146917	124	0.409475	0.0806452	1.27848	-0.837339	0.577273	-1.45051
NA	X6_194344	OCPTN_ST	OCPTN_STTRUE	1	0.146955	46	0.913278	0.304348	1	-1.04246	0.718756	-1.45037
NA	X6_95788	OCPTN_ST	OCPTN_STTRUE	1	0.146955	46	0.913278	0.695652	1	1.04246	0.718756	1.45037
Tongue dorsum	X6_117494	DSUDIET	DSUDIET	1	0.147025	124	0.8208	0.75	0.24689	-0.691494	0.476853	-1.45012
Buccal mucosa	X6_119084	BMI_CAT	BMI_CAToverweight	1	0.147155	116	0.51275	0.112069	1.3928	-1.00674	0.694469	-1.44965
Tongue dorsum	X6_58175	BMI_CAT	BMI_CAToverweight	1	0.147169	128	0.86681	0.28125	1.37968	-0.622016	0.429094	-1.4496
Supragingival plaque	X6_67816	BMI_CAT	BMI_CAToverweight	1	0.147314	120	1	0.491667	1.41039	-0.584753	0.403532	-1.44908
NA	X6_88033	DSUBFED	DSUBFED	1	0.147497	108	0.700769	0.185185	1.18299	-0.718095	0.495775	-1.44843
Supragingival plaque	X6_94538	BMI_CAT	BMI_CATobese	1	0.147927	120	0.550406	0.125	1.41039	1.06768	0.737911	1.44689
Nares	X6_104327	OCPTN_ST	OCPTN_STTRUE	1	0.148016	19	0.799049	0.210526	1	1.94591	1.34519	1.44657
NA	X6_189038	BMI_CAT	BMI_CATobese	1	0.148083	111	1	0.459459	1.43492	0.851822	0.588952	1.44634
Buccal mucosa	X6_49238	DSUBFED	DSUBFED	1	0.148467	113	0.701766	0.185841	1.30913	0.758826	0.525151	1.44497
Supragingival plaque	X6_135880	DSUBFED	DSUBFED	1	0.148632	117	0.856901	0.273504	1.28041	0.554671	0.38402	1.44438
NA	X6_142856	DSUBFED	DSUBFED	1	0.149612	108	1	0.527778	1.18299	0.541948	0.376116	1.4409
Buccal mucosa	X6_154692	MURICA	MURICATRUE	1	0.150315	116	1	0.534483	0.53827	0.858696	0.596972	1.43842
Tongue dorsum	X6_91527	EDLVL_BS	EDLVL_BSTRUE	1	0.15046	19	1	0.578947	0.996792	-1.89474	1.3177	-1.43791
Tongue dorsum	X6_49036	BMI_CAT	BMI_CAToverweight	1	0.150529	128	0.400306	0.078125	1.37968	-1.17663	0.818429	-1.43767
NA	X6_86151	OCPTN_ST	OCPTN_STTRUE	1	0.15168	46	0.577004	0.869565	1	1.67356	1.16737	1.43362
NA	X6_33238	BMI_CAT	BMI_CAToverweight	1	0.151714	111	0.625998	0.153153	1.43492	0.842432	0.587674	1.4335
Tongue dorsum	X6_104618	BMI_CAT	BMI_CAToverweight	1	0.15258	128	0.998945	0.445312	1.37968	0.55928	0.390975	1.43048
Tongue dorsum	X6_104115	BMI_CAT	BMI_CATobese	1	0.152604	128	0.914776	0.679688	1.37968	1.16171	0.812158	1.43039
Buccal mucosa	X6_139150	OCPTN_ST	OCPTN_STTRUE	1	0.153206	22	1	0.5	1	-1.43508	1.00475	-1.4283
Buccal mucosa	X6_97267	DSUBFED	DSUBFED	1	0.153341	113	0.858449	0.725664	1.30913	-0.515119	0.360771	-1.42783
Tongue dorsum	X6_119756	OCPTN_ST	OCPTN_STTRUE	1	0.15392	32	0.999666	0.59375	0.999666	1.20088	0.842237	1.42582
NA	X6_202734	MURICA	MURICATRUE	1	0.154217	111	0.961888	0.630631	0.500955	-1.14647	0.804657	-1.42479
Buccal mucosa	X7_21650	DSUBFED	DSUBFED	1	0.154404	113	0.406404	0.079646	1.30913	0.81103	0.569485	1.42415
Nares	X6_61081	BMI_CAT	BMI_CATobese	1	0.154665	92	0.394769	0.076087	1.44118	1.52302	1.0701	1.42325
Supragingival plaque	X6_209274	DSUBFED	DSUBFED	1	0.154803	117	0.994505	0.57265	1.28041	0.475786	0.334408	1.42277
Nares	X6_181184	DSUBFED	DSUBFED	1	0.155128	88	0.805888	0.238636	1.36952	-0.650539	0.457594	-1.42165
Supragingival plaque	X6_159261	BMI_CAT	BMI_CATobese	1	0.155229	120	0.891811	0.3	1.41039	-1.16673	0.820889	-1.4213
Supragingival plaque	X6_77027	OCPTN_ST	OCPTN_STTRUE	1	0.155242	23	0.999762	0.391304	1	1.43505	1.0097	1.42126
Nares	X6_30143	MURICA	MURICATRUE	1	0.155704	92	1	0.478261	0.504173	-1.05373	0.742236	-1.41967
Tongue dorsum	X6_54148	DSUBFED	DSUBFED	1	0.156337	124	0.967859	0.379032	1.27848	-0.474596	0.334812	-1.4175
Buccal mucosa	X6_149008	DSUBFED	DSUBFED	1	0.156645	113	0.547679	0.123894	1.30913	0.750005	0.529498	1.41645
Supragingival plaque	X6_139150	BMI_CAT	BMI_CATobese	1	0.156796	120	0.998498	0.441667	1.41039	0.872933	0.616509	1.41593
Nares	X6_65508	BMI_CAT	BMI_CAToverweight	1	0.15693	92	0.433354	0.0869565	1.44118	-1.58597	1.12046	-1.41547
Tongue dorsum	X6_154692	DCMCODE_13	DCMCODE_13TRUE	1	0.157027	33	0.345654	0.939394	0.641541	-2.48491	1.75594	-1.41514
Tongue dorsum	X6_90240	DCMCODE_13	DCMCODE_13TRUE	1	0.157027	33	0.345654	0.939394	0.641541	-2.48491	1.75594	-1.41514
Tongue dorsum	X6_79208	DCMCODE_13	DCMCODE_13TRUE	1	0.157027	33	0.345654	0.0606061	0.641541	2.48491	1.75594	1.41514
NA	X6_75619	MURICA	MURICATRUE	1	0.157229	111	0.554155	0.126126	0.500955	-1.06357	0.751931	-1.41445
Supragingival plaque	X6_159261	OCPTN_ST	OCPTN_STTRUE	1	0.157402	23	0.97934	0.347826	1	-1.35046	0.955159	-1.41386
Supragingival plaque	X6_105925	BMI_CAT	BMI_CAToverweight	1	0.157725	120	0.976578	0.391667	1.41039	-0.585866	0.414695	-1.41276
NA	X6_119084	MURICA	MURICATRUE	1	0.157875	111	0.825497	0.252252	0.500955	-0.899957	0.637249	-1.41225
Tongue dorsum	X6_63853	DSUDIET	DSUDIET	1	0.157901	124	0.978401	0.604839	0.24689	-0.817093	0.578609	-1.41217
Tongue dorsum	X6_37895	MURICA	MURICATRUE	1	0.157918	128	0.794532	0.234375	0.52739	-0.905998	0.641593	-1.41211
Tongue dorsum	X6_104618	DCMCODE_13	DCMCODE_13TRUE	1	0.158029	33	1	0.515152	0.641541	-1.6689	1.18217	-1.41173
NA	X6_184881	BMI_CAT	BMI_CAToverweight	1	0.158208	111	0.839464	0.261261	1.43492	0.693125	0.491186	1.41112
Buccal mucosa	X6_61956	DSUBFED	DSUBFED	1	0.158412	113	0.466752	0.902655	1.30913	0.803218	0.569483	1.41043
Tongue dorsum	X6_85774	BMI_CAT	BMI_CAToverweight	1	0.158536	128	0.651438	0.164062	1.37968	-0.792466	0.562027	-1.41001
Supragingival plaque	X6_25433	MURICA	MURICATRUE	1	0.158719	120	1	0.475	0.501139	-0.89908	0.63792	-1.40939
Buccal mucosa	X6_125450	BMI_CAT	BMI_CATobese	1	0.158841	116	0.968729	0.62069	1.3928	-0.921499	0.654019	-1.40898
Buccal mucosa	X6_72839	MURICA	MURICATRUE	1	0.159748	116	0.80735	0.241379	0.53827	1.49642	1.06437	1.40592
Tongue dorsum	X6_142117	MURICA	MURICATRUE	1	0.159756	128	0.98004	0.398438	0.52739	0.962554	0.684656	1.40589
NA	X6_107271	BMI_CAT	BMI_CAToverweight	1	0.160178	111	0.810899	0.756757	1.43492	-0.679421	0.483755	-1.40447
NA	X6_85774	BMI_CAT	BMI_CAToverweight	1	0.160318	111	0.865561	0.720721	1.43492	0.680144	0.484432	1.404
Buccal mucosa	X6_61652	DSUBFED	DSUBFED	1	0.160429	113	0.303572	0.0530973	1.30913	1.13213	0.80657	1.40363
Tongue dorsum	X6_173387	DSUDIET	DSUDIET	1	0.160842	124	0.8208	0.75	0.24689	-0.672595	0.479655	-1.40225
Buccal mucosa	X6_72839	BMI_CAT	BMI_CATobese	1	0.16109	116	0.80735	0.241379	1.3928	-1.53039	1.09203	-1.40141
Tongue dorsum	X6_113993	MURICA	MURICATRUE	1	0.161338	128	0.95872	0.632812	0.52739	0.782003	0.55834	1.40059
Tongue dorsum	X6_108247	EDLVL_BS	EDLVL_BSTRUE	1	0.161418	19	0.958712	0.315789	0.996792	-1.63037	1.16429	-1.40032
Tongue dorsum	X6_85545	DSUBFED	DSUBFED	1	0.161947	124	0.908642	0.685484	1.27848	0.477751	0.341604	1.39855
Tongue dorsum	X6_173979	OCPTN_ST	OCPTN_STTRUE	1	0.162028	32	0.999666	0.40625	0.999666	1.15474	0.825827	1.39828
Tongue dorsum	X6_153897	MURICA	MURICATRUE	1	0.162156	128	0.427837	0.914062	0.52739	1.05445	0.754336	1.39786
Nares	X6_44338	DSUBFED	DSUBFED	1	0.162613	88	0.159384	0.0227273	1.36952	2.07412	1.4854	1.39634
Nares	X6_92037	DSUBFED	DSUBFED	1	0.162613	88	0.159384	0.0227273	1.36952	2.07412	1.4854	1.39634
Supragingival plaque	X6_211583	MURICA	MURICATRUE	1	0.16298	120	0.958957	0.366667	0.501139	-0.988744	0.708717	-1.39512
NA	X6_76246	BMI_CAT	BMI_CATobese	1	0.163071	111	0.442807	0.90991	1.43492	-1.45953	1.04639	-1.39482
NA	X6_76152	BMI_CAT	BMI_CAToverweight	1	0.163441	111	0.500955	0.891892	1.43492	-0.96793	0.694557	-1.39359
NA	X6_84398	MURICA	MURICATRUE	1	0.163722	111	0.996554	0.432432	0.500955	0.979734	0.703497	1.39266
Supragingival plaque	X6_199448	BMI_CAT	BMI_CAToverweight	1	0.163964	120	0.981532	0.6	1.41039	-0.598853	0.430253	-1.39186
Tongue dorsum	X6_117494	DCMCODE_13	DCMCODE_13TRUE	1	0.164265	33	0.714727	0.818182	0.641541	-1.56659	1.12634	-1.39087
NA	X6_149008	MURICA	MURICATRUE	1	0.164578	111	1	0.459459	0.500955	-0.91535	0.658602	-1.38984
Posterior fornix	X6_30726	BMI_CAT	BMI_CAToverweight	1	0.164932	59	0.538976	0.118644	1.46579	1.3225	0.95235	1.38867
Supragingival plaque	X6_93518	OCPTN_ST	OCPTN_STTRUE	1	0.164982	23	0.97934	0.652174	1	-1.42798	1.02843	-1.38851
Supragingival plaque	X6_159659	BMI_CAT	BMI_CAToverweight	1	0.16578	120	1	0.508333	1.41039	0.579332	0.418021	1.38589
Nares	X6_83290	DSUBFED	DSUBFED	1	0.16579	88	0.407607	0.0795455	1.36952	1.05278	0.759661	1.38586
Tongue dorsum	X6_88025	BMI_CAT	BMI_CATobese	1	0.16584	128	0.794532	0.234375	1.37968	0.902298	0.651153	1.38569
Supragingival plaque	X6_205297	BMI_CAT	BMI_CAToverweight	1	0.165849	120	0.965286	0.625	1.41039	-0.582872	0.420645	-1.38566
NA	X6_148529	BMI_CAT	BMI_CATobese	1	0.165975	111	0.810899	0.243243	1.43492	0.859365	0.620367	1.38525
NA	X6_203385	OCPTN_ST	OCPTN_STTRUE	1	0.166088	46	0.688113	0.826087	1	1.26712	0.914963	1.38488
Buccal mucosa	X6_196633	OCPTN_ST	OCPTN_STTRUE	1	0.166101	22	0.898059	0.727273	1	-1.75069	1.26418	-1.38484
NA	X6_140225	OCPTN_ST	OCPTN_STTRUE	1	0.166319	46	0.577004	0.869565	1	-1.3649	0.986108	-1.38413
NA	X6_60151	OCPTN_ST	OCPTN_STTRUE	1	0.166319	46	0.577004	0.130435	1	1.3649	0.986108	1.38413
NA	X6_213905	MURICA	MURICATRUE	1	0.166333	111	0.709098	0.189189	0.500955	-0.93444	0.675133	-1.38408
Supragingival plaque	X6_69531	BMI_CAT	BMI_CATobese	1	0.166716	120	0.999796	0.45	1.41039	-0.909666	0.657828	-1.38283
Tongue dorsum	X6_119756	DSUDIET	DSUDIET	1	0.166931	124	1	0.532258	0.24689	-0.787256	0.569595	-1.38213
Tongue dorsum	X6_188170	DSUBFED	DSUBFED	1	0.166985	124	0.717283	0.193548	1.27848	0.633684	0.458542	1.38196
Tongue dorsum	X6_184360	MURICA	MURICATRUE	1	0.167031	128	0.877262	0.289062	0.52739	-0.829879	0.600575	-1.38181
Tongue dorsum	X6_158611	MURICA	MURICATRUE	1	0.167661	128	0.86681	0.28125	0.52739	1.09268	0.791939	1.37976
Tongue dorsum	X6_58175	DSUBFED	DSUBFED	1	0.167689	124	0.868492	0.282258	1.27848	-0.492392	0.356892	-1.37967
Tongue dorsum	X6_99853	BMI_CAT	BMI_CAToverweight	1	0.167819	128	0.400306	0.921875	1.37968	-1.21478	0.880759	-1.37925
Supragingival plaque	X6_90688	OCPTN_ST	OCPTN_STTRUE	1	0.168115	23	0.70964	0.173913	1	-1.76431	1.28008	-1.37829
Tongue dorsum	X6_205297	BMI_CAT	BMI_CAToverweight	1	0.168486	128	1	0.484375	1.37968	0.535851	0.38912	1.37708
Tongue dorsum	X6_36135	EDLVL_BS	EDLVL_BSTRUE	1	0.168532	19	0.678954	0.157895	0.996792	-2.17584	1.58021	-1.37694
Tongue dorsum	X6_39457	EDLVL_BS	EDLVL_BSTRUE	1	0.168532	19	0.678954	0.842105	0.996792	2.17584	1.58021	1.37694
NA	X6_109965	MURICA	MURICATRUE	1	0.169352	111	0.810899	0.243243	0.500955	-0.878234	0.639046	-1.37429
Tongue dorsum	X6_104618	EDLVL_BS	EDLVL_BSTRUE	1	0.169629	19	0.996792	0.631579	0.996792	-1.72566	1.25649	-1.3734
Tongue dorsum	X6_135880	BMI_CAT	BMI_CAToverweight	1	0.169883	128	0.613006	0.148438	1.37968	0.719009	0.523839	1.37258
NA	X6_118674	BMI_CAT	BMI_CAToverweight	1	0.170121	111	0.839464	0.738739	1.43492	0.702927	0.512406	1.37182
NA	X6_77230	BMI_CAT	BMI_CATobese	1	0.170946	111	0.554155	0.873874	1.43492	-0.979272	0.71523	-1.36917
Supragingival plaque	X6_56043	BMI_CAT	BMI_CAToverweight	1	0.171387	120	0.658089	0.833333	1.41039	-0.729496	0.533351	-1.36776
NA	X6_105916	BMI_CAT	BMI_CATobese	1	0.171516	111	1	0.495495	1.43492	-0.830971	0.607724	-1.36735
NA	X6_127818	DSUBFED	DSUBFED	1	0.171584	108	0.997509	0.435185	1.18299	-0.519596	0.380063	-1.36713
Supragingival plaque	X6_120450	MURICA	MURICATRUE	1	0.172129	120	0.993447	0.575	0.501139	-0.932326	0.682826	-1.36539
Posterior fornix	X6_49036	DSUBFED	DSUBFED	1	0.17279	59	0.219402	0.0338983	1.06219	1.88062	1.37947	1.36329
Tongue dorsum	X6_17925	DCMCODE_13	DCMCODE_13TRUE	1	0.172881	33	0.954434	0.333333	0.641541	1.39534	1.02373	1.36301
Tongue dorsum	X6_44338	DCMCODE_13	DCMCODE_13TRUE	1	0.172881	33	0.954434	0.666667	0.641541	-1.39534	1.02373	-1.36301
Supragingival plaque	X6_97267	DSUDIET	DSUDIET	1	0.173009	117	1	0.504274	0.258144	0.779861	0.572333	1.3626
Tongue dorsum	X6_103923	MURICA	MURICATRUE	1	0.174378	128	0.50394	0.109375	0.52739	-1.00621	0.740801	-1.35827
NA	X6_116015	BMI_CAT	BMI_CAToverweight	1	0.174606	111	0.411615	0.0810811	1.43492	1.04365	0.768771	1.35755
NA	X6_145397	DSUBFED	DSUBFED	1	0.174635	108	0.990908	0.583333	1.18299	-0.512454	0.37751	-1.35746
Tongue dorsum	X6_129689	OCPTN_ST	OCPTN_STTRUE	1	0.175079	32	0.792288	0.21875	0.999666	1.38766	1.0233	1.35606
Supragingival plaque	X6_173132	DSUDIET	DSUDIET	1	0.175219	117	0.817925	0.247863	0.258144	0.690695	0.509503	1.35562
Tongue dorsum	X6_69531	MURICA	MURICATRUE	1	0.175285	128	0.914776	0.320312	0.52739	1.08598	0.801212	1.35542
Tongue dorsum	X6_58175	OCPTN_ST	OCPTN_STTRUE	1	0.175468	32	0.894393	0.28125	0.999666	-1.30145	0.96059	-1.35484
NA	X6_210288	OCPTN_ST	OCPTN_STTRUE	1	0.175652	46	0.77935	0.217391	1	-1.10166	0.813471	-1.35427
Tongue dorsum	X6_118674	DSUBFED	DSUBFED	1	0.176194	124	0.514836	0.112903	1.27848	0.79092	0.584754	1.35257
NA	X6_39471	MURICA	MURICATRUE	1	0.176219	111	0.745871	0.792793	0.500955	0.96053	0.710194	1.35249
Tongue dorsum	X6_116723	MURICA	MURICATRUE	1	0.17625	128	0.807761	0.242188	0.52739	-0.870233	0.643478	-1.35239
NA	X7_129304	MURICA	MURICATRUE	1	0.177156	111	0.825497	0.252252	0.500955	-0.85486	0.633435	-1.34956
NA	X6_107271	OCPTN_ST	OCPTN_STTRUE	1	0.177349	46	0.735986	0.804348	1	1.1987	0.888605	1.34896
Buccal mucosa	X7_81985	BMI_CAT	BMI_CAToverweight	1	0.177687	116	0.979869	0.396552	1.3928	0.545791	0.404916	1.34791
NA	X6_127818	BMI_CAT	BMI_CAToverweight	1	0.177894	111	0.993454	0.423423	1.43492	0.57425	0.426233	1.34727
NA	X6_161782	DSUBFED	DSUBFED	1	0.178147	108	0.658986	0.166667	1.18299	-0.675518	0.501691	-1.34648
Supragingival plaque	X6_177585	BMI_CAT	BMI_CAToverweight	1	0.178466	120	0.501139	0.108333	1.41039	-1.10228	0.819237	-1.34549
Tongue dorsum	X6_90481	DSUBFED	DSUBFED	1	0.178784	124	0.857296	0.725806	1.27848	-0.470287	0.349783	-1.34451
NA	X6_148529	MURICA	MURICATRUE	1	0.180048	111	0.810899	0.243243	0.500955	1.44151	1.07527	1.34061
Tongue dorsum	X6_179701	EDLVL_BS	EDLVL_BSTRUE	1	0.180553	19	1	0.473684	0.996792	1.48642	1.11005	1.33905
Supragingival plaque	X6_135314	BMI_CAT	BMI_CATobese	1	0.181069	120	0.730802	0.2	1.41039	-1.44602	1.08116	-1.33747
Buccal mucosa	X6_103923	MURICA	MURICATRUE	1	0.181169	116	0.398856	0.0775862	0.53827	-1.24982	0.934683	-1.33716
NA	X6_84398	BMI_CAT	BMI_CAToverweight	1	0.181546	111	0.996554	0.432432	1.43492	0.570738	0.427197	1.33601
NA	X6_205736	BMI_CAT	BMI_CAToverweight	1	0.181774	111	1	0.522523	1.43492	0.565659	0.423616	1.33531
Tongue dorsum	X6_177609	EDLVL_BS	EDLVL_BSTRUE	1	0.18277	19	0.996792	0.368421	0.996792	-1.42313	1.0682	-1.33227
Tongue dorsum	X6_123660	EDLVL_BS	EDLVL_BSTRUE	1	0.18277	19	0.996792	0.368421	0.996792	-1.42313	1.0682	-1.33227
Tongue dorsum	X6_91953	EDLVL_BS	EDLVL_BSTRUE	1	0.18277	19	1	0.473684	0.996792	-1.42313	1.0682	-1.33227
Tongue dorsum	X6_145806	DSUDIET	DSUDIET	1	0.182926	124	0.807634	0.758065	0.24689	-0.655584	0.492254	-1.3318
Tongue dorsum	X6_33024	BMI_CAT	BMI_CAToverweight	1	0.183016	128	0.720675	0.195312	1.37968	0.639017	0.479913	1.33153
NA	X6_141836	BMI_CAT	BMI_CAToverweight	1	0.183157	111	0.865561	0.279279	1.43492	0.605996	0.455261	1.3311
Tongue dorsum	X6_142117	OCPTN_ST	OCPTN_STTRUE	1	0.183176	32	0.987957	0.375	0.999666	1.07113	0.804734	1.33104
Supragingival plaque	X7_123707	MURICA	MURICATRUE	1	0.183297	120	0.993447	0.425	0.501139	-0.862803	0.648397	-1.33067
Posterior fornix	X6_160917	BMI_CAT	BMI_CAToverweight	1	0.183406	59	0.973577	0.372881	1.46579	0.863229	0.648877	1.33034
NA	X6_62357	BMI_CAT	BMI_CAToverweight	1	0.183577	111	0.76316	0.783784	1.43492	0.708986	0.533143	1.32982
NA	X6_202994	DSUBFED	DSUBFED	1	0.183616	108	0.8222	0.75	1.18299	0.572758	0.430742	1.3297
Nares	X6_104327	MURICA	MURICATRUE	1	0.18373	92	0.309787	0.0543478	0.504173	-1.95388	1.4698	-1.32936
Retroauricular crease	X6_104120	DSUBFED	DSUBFED	1	0.183746	23	0.595609	0.130435	1.55818	1.94591	1.46385	1.32931
Retroauricular crease	X6_107496	DSUBFED	DSUBFED	1	0.183746	23	0.595609	0.130435	1.55818	1.94591	1.46385	1.32931
Retroauricular crease	X6_125450	DSUBFED	DSUBFED	1	0.183746	23	0.595609	0.130435	1.55818	1.94591	1.46385	1.32931
Retroauricular crease	X6_173132	DSUBFED	DSUBFED	1	0.183746	23	0.595609	0.130435	1.55818	1.94591	1.46385	1.32931
Retroauricular crease	X6_37664	DSUBFED	DSUBFED	1	0.183746	23	0.595609	0.130435	1.55818	1.94591	1.46385	1.32931
Retroauricular crease	X6_44338	DSUBFED	DSUBFED	1	0.183746	23	0.595609	0.130435	1.55818	1.94591	1.46385	1.32931
Retroauricular crease	X6_71275	DSUBFED	DSUBFED	1	0.183746	23	0.595609	0.130435	1.55818	1.94591	1.46385	1.32931
Tongue dorsum	X6_41475	BMI_CAT	BMI_CAToverweight	1	0.183808	128	0.427837	0.0859375	1.37968	1.01919	0.766816	1.32912
Nares	X6_92939	BMI_CAT	BMI_CAToverweight	1	0.183859	92	0.262466	0.0434783	1.44118	1.58623	1.19358	1.32897
NA	X6_213905	DSUBFED	DSUBFED	1	0.185054	108	0.720396	0.194444	1.18299	0.626612	0.472789	1.32535
NA	X6_147771	DSUBFED	DSUBFED	1	0.185054	108	0.720396	0.194444	1.18299	0.626612	0.472789	1.32535
Buccal mucosa	X6_17925	MURICA	MURICATRUE	1	0.185387	116	0.962422	0.37069	0.53827	0.909841	0.68701	1.32435
Tongue dorsum	X7_81985	MURICA	MURICATRUE	1	0.185851	128	0.931035	0.335938	0.52739	-0.752065	0.568474	-1.32295
Buccal mucosa	X6_54148	DSUBFED	DSUBFED	1	0.185965	113	0.373951	0.0707965	1.30913	0.832635	0.629539	1.32261
NA	X6_208248	MURICA	MURICATRUE	1	0.186133	111	0.825497	0.252252	0.500955	-0.838217	0.634001	-1.32211
NA	X6_153601	BMI_CAT	BMI_CATobese	1	0.186143	111	0.889288	0.297297	1.43492	-1.07496	0.813084	-1.32208
NA	X6_49036	DCMCODE_13	DCMCODE_13TRUE	1	0.186435	46	0.266976	0.956522	0.688113	-2.03688	1.54169	-1.3212
Buccal mucosa	X6_146554	BMI_CAT	BMI_CATobese	1	0.186781	116	0.984684	0.405172	1.3928	-0.952825	0.721748	-1.32016
NA	X6_195565	DSUBFED	DSUBFED	1	0.186878	108	0.807018	0.759259	1.18299	0.597664	0.45282	1.31987
Tongue dorsum	X6_208903	DCMCODE_13	DCMCODE_13TRUE	1	0.187634	33	0.954434	0.666667	0.641541	-1.32517	1.00574	-1.31761
NA	X6_70847	BMI_CAT	BMI_CAToverweight	1	0.1877	111	0.709098	0.189189	1.43492	-0.75483	0.572963	-1.31741
Buccal mucosa	X6_109255	DSUBFED	DSUBFED	1	0.187961	113	0.339752	0.0619469	1.30913	0.942789	0.716059	1.31664
Buccal mucosa	X6_173979	DSUBFED	DSUBFED	1	0.187976	113	0.596214	0.141593	1.30913	-0.645445	0.49024	-1.31659
Buccal mucosa	X7_102617	DSUBFED	DSUBFED	1	0.188148	113	0.985925	0.40708	1.30913	-0.439554	0.333988	-1.31608
Posterior fornix	X6_62357	BMI_CAT	BMI_CAToverweight	1	0.188223	59	0.486652	0.101695	1.46579	1.36048	1.03391	1.31585
Supragingival plaque	X6_153831	BMI_CAT	BMI_CAToverweight	1	0.188694	120	1	0.466667	1.41039	-0.536105	0.407854	-1.31445
Supragingival plaque	X7_21650	DSUBFED	DSUBFED	1	0.188701	117	1	0.470085	1.28041	0.432629	0.329138	1.31443
Supragingival plaque	X6_70847	MURICA	MURICATRUE	1	0.189631	120	0.965286	0.375	0.501139	-0.781374	0.595709	-1.31167
NA	X6_107860	DCMCODE_13	DCMCODE_13TRUE	1	0.189921	46	0.958712	0.347826	0.688113	-1.47297	1.1237	-1.31081
Buccal mucosa	X6_196036	BMI_CAT	BMI_CATobese	1	0.190089	116	0.992704	0.577586	1.3928	-0.854872	0.652416	-1.31032
Nares	X6_30143	BMI_CAT	BMI_CATobese	1	0.190172	92	1	0.478261	1.44118	-0.894984	0.683158	-1.31007
NA	X6_128085	OCPTN_ST	OCPTN_STTRUE	1	0.190276	46	0.989588	0.391304	1	-0.866688	0.661714	-1.30976
NA	X6_95094	DSUBFED	DSUBFED	1	0.190658	108	0.386407	0.925926	1.18299	0.989899	0.756436	1.30864
Nares	X6_30143	DSUBFED	DSUBFED	1	0.191087	88	1	0.454545	1.36952	0.469758	0.359315	1.30737
NA	X6_211540	BMI_CAT	BMI_CATobese	1	0.191098	111	0.999951	0.45045	1.43492	0.782626	0.598642	1.30734
NA	X6_56522	DSUBFED	DSUBFED	1	0.191526	108	0.386407	0.0740741	1.18299	0.860583	0.658906	1.30608
Tongue dorsum	X6_103923	OCPTN_ST	OCPTN_STTRUE	1	0.191825	32	0.654542	0.15625	0.999666	1.50886	1.15604	1.3052
Tongue dorsum	X6_149008	OCPTN_ST	OCPTN_STTRUE	1	0.191825	32	0.654542	0.84375	0.999666	-1.50886	1.15604	-1.3052
Tongue dorsum	X6_205297	DCMCODE_13	DCMCODE_13TRUE	1	0.191827	33	1	0.484848	0.641541	-1.54448	1.18333	-1.30519
Tongue dorsum	X6_161782	BMI_CAT	BMI_CAToverweight	1	0.191956	128	0.454231	0.09375	1.37968	-0.915701	0.701786	-1.30482
Nares	X6_161782	BMI_CAT	BMI_CAToverweight	1	0.192091	92	0.999944	0.445652	1.44118	-0.620871	0.475975	-1.30442
Buccal mucosa	X6_205407	MURICA	MURICATRUE	1	0.192405	116	0.777348	0.224138	0.53827	1.38935	1.06587	1.3035
NA	X6_56043	MURICA	MURICATRUE	1	0.192595	111	0.825497	0.747748	0.500955	-1.39344	1.06946	-1.30294
Tongue dorsum	X6_196036	DCMCODE_13	DCMCODE_13TRUE	1	0.192715	33	0.954434	0.333333	0.641541	1.47591	1.13306	1.30259
Buccal mucosa	X6_196036	MURICA	MURICATRUE	1	0.193641	116	0.992704	0.577586	0.53827	0.759608	0.584366	1.29988
Tongue dorsum	X6_104115	OCPTN_ST	OCPTN_STTRUE	1	0.194018	32	0.847418	0.75	0.999666	1.54663	1.19083	1.29879
Buccal mucosa	X6_103412	DSUBFED	DSUBFED	1	0.194064	113	0.547679	0.123894	1.30913	-0.747331	0.575467	-1.29865
Tongue dorsum	X6_69531	BMI_CAT	BMI_CATobese	1	0.194643	128	0.914776	0.320312	1.37968	-0.943724	0.727641	-1.29696
Buccal mucosa	X6_66152	BMI_CAT	BMI_CAToverweight	1	0.194838	116	1	0.465517	1.3928	-0.522082	0.402716	-1.2964
Tongue dorsum	X6_58645	DSUDIET	DSUDIET	1	0.19575	124	0.857296	0.725806	0.24689	-0.616778	0.476735	-1.29375
Tongue dorsum	X6_66152	DSUDIET	DSUDIET	1	0.196253	124	0.987195	0.58871	0.24689	-0.757532	0.586188	-1.2923
Nares	X6_65508	DSUBFED	DSUBFED	1	0.196414	88	0.447164	0.0909091	1.36952	0.94304	0.730001	1.29183
Buccal mucosa	X6_61889	DSUBFED	DSUBFED	1	0.197142	113	0.969857	0.619469	1.30913	-0.431437	0.334515	-1.28974
Buccal mucosa	X6_177585	BMI_CAT	BMI_CATobese	1	0.197699	116	0.709685	0.189655	1.3928	-1.41573	1.09905	-1.28813
Supragingival plaque	X6_54148	BMI_CAT	BMI_CAToverweight	1	0.198665	120	0.976578	0.608333	1.41039	-0.526417	0.409546	-1.28537
Tongue dorsum	X6_104618	MURICA	MURICATRUE	1	0.19894	128	0.998945	0.445312	0.52739	0.797015	0.62045	1.28458
Retroauricular crease	X6_181184	DSUBFED	DSUBFED	1	0.199067	23	0.999762	0.391304	1.55818	-1.45935	1.13638	-1.28421
Supragingival plaque	X6_90688	BMI_CAT	BMI_CAToverweight	1	0.199114	120	0.447653	0.0916667	1.41039	-1.057	0.823156	-1.28408
Tongue dorsum	X6_25433	DSUBFED	DSUBFED	1	0.19924	124	0.764973	0.782258	1.27848	0.486004	0.378591	1.28372
Supragingival plaque	X6_173979	OCPTN_ST	OCPTN_STTRUE	1	0.199806	23	1	0.478261	1	-1.24592	0.971775	-1.2821
Supragingival plaque	X6_25433	OCPTN_ST	OCPTN_STTRUE	1	0.199806	23	1	0.478261	1	-1.24592	0.971775	-1.2821
Supragingival plaque	X6_90845	OCPTN_ST	OCPTN_STTRUE	1	0.199806	23	1	0.478261	1	-1.24592	0.971775	-1.2821
NA	X6_97505	BMI_CAT	BMI_CAToverweight	1	0.200017	111	0.974651	0.612613	1.43492	-0.55318	0.431664	-1.2815
Buccal mucosa	X6_90481	BMI_CAT	BMI_CATobese	1	0.200227	116	0.955627	0.637931	1.3928	-0.832927	0.650264	-1.28091
Supragingival plaque	X6_97267	BMI_CAT	BMI_CATobese	1	0.200232	120	1	0.5	1.41039	0.827105	0.645727	1.28089
Tongue dorsum	X6_26759	DSUDIET	DSUDIET	1	0.200266	124	0.917555	0.677419	0.24689	-0.603649	0.471309	-1.28079
Tongue dorsum	X6_41475	DCMCODE_13	DCMCODE_13TRUE	1	0.200371	33	0.714727	0.181818	0.641541	1.36992	1.06984	1.28049
Buccal mucosa	X6_113953	MURICA	MURICATRUE	1	0.200545	116	0.998218	0.560345	0.53827	-0.805116	0.628997	-1.28
Tongue dorsum	X6_49238	DSUBFED	DSUBFED	1	0.201302	124	0.779733	0.225806	1.27848	0.537244	0.420428	1.27785
NA	X6_107271	MURICA	MURICATRUE	1	0.201752	111	0.810899	0.756757	0.500955	-1.36543	1.06961	-1.27658
Supragingival plaque	X6_61889	OCPTN_ST	OCPTN_STTRUE	1	0.203241	23	1	0.565217	1	1.60944	1.26491	1.27237
Tongue dorsum	X6_49947	DCMCODE_13	DCMCODE_13TRUE	1	0.203431	33	0.345654	0.939394	0.641541	-1.93383	1.5205	-1.27184
Tongue dorsum	X6_36135	OCPTN_ST	OCPTN_STTRUE	1	0.203435	32	0.728333	0.1875	0.999666	1.29914	1.02148	1.27183
Buccal mucosa	X6_142117	MURICA	MURICATRUE	1	0.203474	116	0.792653	0.232759	0.53827	1.36593	1.07409	1.27172
Tongue dorsum	X6_33024	MURICA	MURICATRUE	1	0.203521	128	0.720675	0.195312	0.52739	1.35269	1.06379	1.27158
Nares	X6_39457	BMI_CAT	BMI_CATobese	1	0.204087	92	0.353708	0.0652174	1.44118	1.36387	1.07392	1.26999
Tongue dorsum	X6_54148	OCPTN_ST	OCPTN_STTRUE	1	0.204111	32	0.987957	0.375	0.999666	-1.07719	0.84823	-1.26993
Supragingival plaque	X7_81985	BMI_CAT	BMI_CAToverweight	1	0.20437	120	0.965286	0.625	1.41039	0.533715	0.420513	1.2692
NA	X6_141836	DCMCODE_13	DCMCODE_13TRUE	1	0.2045	46	0.937734	0.326087	0.688113	-1.42804	1.12547	-1.26883
Tongue dorsum	X6_91527	BMI_CAT	BMI_CAToverweight	1	0.204891	128	0.998945	0.554688	1.37968	0.495256	0.390661	1.26774
Tongue dorsum	X6_156982	DSUDIET	DSUDIET	1	0.205626	124	0.8208	0.75	0.24689	-0.625248	0.494	-1.26568
Nares	X6_103923	BMI_CAT	BMI_CAToverweight	1	0.205639	92	0.469748	0.0978261	1.44118	0.978649	0.77324	1.26565
Supragingival plaque	X6_24722	BMI_CAT	BMI_CATobese	1	0.206052	120	0.999796	0.55	1.41039	-0.822497	0.650455	-1.26449
Supragingival plaque	X6_128085	DSUDIET	DSUDIET	1	0.20624	117	1	0.538462	0.258144	-0.722648	0.571728	-1.26397
NA	X6_158611	DCMCODE_13	DCMCODE_13TRUE	1	0.206715	46	0.913278	0.695652	0.688113	-1.01207	0.801548	-1.26265
Supragingival plaque	X6_154791	DSUDIET	DSUDIET	1	0.207092	117	0.987201	0.589744	0.258144	-0.744693	0.590275	-1.2616
Buccal mucosa	X6_72618	BMI_CAT	BMI_CATobese	1	0.207476	116	0.883494	0.706897	1.3928	-0.845481	0.670731	-1.26054
Posterior fornix	X6_208036	DSUBFED	DSUBFED	1	0.207954	59	0.297758	0.0508475	1.06219	1.37433	1.09142	1.25921
Posterior fornix	X6_99092	DSUBFED	DSUBFED	1	0.207954	59	0.297758	0.0508475	1.06219	1.37433	1.09142	1.25921
Supragingival plaque	X6_33024	BMI_CAT	BMI_CAToverweight	1	0.207989	120	0.793324	0.233333	1.41039	-0.637082	0.505977	-1.25911
Tongue dorsum	X6_120450	MURICA	MURICATRUE	1	0.208267	128	1	0.46875	0.52739	0.739885	0.587983	1.25834
Posterior fornix	X6_67816	MURICA	MURICATRUE	1	0.208705	59	0.367108	0.0677966	0.429645	-1.66146	1.32163	-1.25713
Posterior fornix	X6_56043	MURICA	MURICATRUE	1	0.208705	59	0.367108	0.0677966	0.429645	-1.66146	1.32163	-1.25713
NA	X7_66598	BMI_CAT	BMI_CATobese	1	0.209218	111	0.810899	0.756757	1.43492	1.03228	0.82206	1.25572
Tongue dorsum	X6_119756	DSUBFED	DSUBFED	1	0.209465	124	1	0.532258	1.27848	-0.397709	0.31689	-1.25504
Supragingival plaque	X6_144765	MURICA	MURICATRUE	1	0.209482	120	0.793324	0.766667	0.501139	0.779171	0.620858	1.25499
Supragingival plaque	X6_85714	OCPTN_ST	OCPTN_STTRUE	1	0.209558	23	0.999762	0.608696	1	-1.50921	1.20276	-1.25478
NA	X6_130646	OCPTN_ST	OCPTN_STTRUE	1	0.209931	46	0.577004	0.130435	1	-1.45743	1.16245	-1.25376
NA	X7_147498	OCPTN_ST	OCPTN_STTRUE	1	0.209931	46	0.577004	0.130435	1	-1.45743	1.16245	-1.25376
NA	X6_90929	DSUBFED	DSUBFED	1	0.21039	108	0.807018	0.240741	1.18299	0.532289	0.424984	1.25249
NA	X6_184628	MURICA	MURICATRUE	1	0.210652	111	1	0.504505	0.500955	-0.816007	0.651881	-1.25177
Supragingival plaque	X6_105925	OCPTN_ST	OCPTN_STTRUE	1	0.210802	23	0.97934	0.347826	1	-1.15755	0.925031	-1.25136
NA	X6_98694	DCMCODE_13	DCMCODE_13TRUE	1	0.211188	46	0.913278	0.304348	0.688113	-1.42743	1.14166	-1.2503
Nares	X6_36135	DSUBFED	DSUBFED	1	0.211316	88	0.484419	0.102273	1.36952	0.815305	0.652268	1.24995
Buccal mucosa	X6_146554	BMI_CAT	BMI_CAToverweight	1	0.211502	116	0.984684	0.405172	1.3928	-0.510187	0.40833	-1.24945
Tongue dorsum	X6_85044	DSUDIET	DSUDIET	1	0.211615	124	0.583576	0.862903	0.24689	-0.613459	0.491106	-1.24914
Nares	X6_96390	DSUBFED	DSUBFED	1	0.21262	88	0.365449	0.0681818	1.36952	-1.0475	0.840429	-1.24639
NA	X7_132061	BMI_CAT	BMI_CAToverweight	1	0.212903	111	0.999951	0.54955	1.43492	-0.524975	0.421456	-1.24562
NA	X6_127818	DCMCODE_13	DCMCODE_13TRUE	1	0.21312	46	1	0.456522	0.688113	-1.09861	0.882397	-1.24503
Supragingival plaque	X6_57018	BMI_CAT	BMI_CAToverweight	1	0.21353	120	0.952174	0.641667	1.41039	-0.557057	0.447824	-1.24392
NA	X7_66598	OCPTN_ST	OCPTN_STTRUE	1	0.21353	46	0.635305	0.847826	1	1.16686	0.938057	1.24392
Tongue dorsum	X6_103923	DSUBFED	DSUBFED	1	0.21364	124	0.490094	0.104839	1.27848	-0.710378	0.571219	-1.24362
Retroauricular crease	X6_117494	DSUBFED	DSUBFED	1	0.21408	23	0.802859	0.217391	1.55818	1.06594	0.857953	1.24242
Retroauricular crease	X6_61956	DSUBFED	DSUBFED	1	0.21408	23	0.802859	0.217391	1.55818	1.06594	0.857953	1.24242
Retroauricular crease	X6_96390	DSUBFED	DSUBFED	1	0.21408	23	0.802859	0.217391	1.55818	1.06594	0.857953	1.24242
NA	X6_92939	DSUBFED	DSUBFED	1	0.2141	108	0.636757	0.157407	1.18299	-0.663652	0.534183	-1.24237
Tongue dorsum	X6_39471	MURICA	MURICATRUE	1	0.214351	128	0.807761	0.757812	0.52739	0.728024	0.586317	1.24169
Tongue dorsum	X6_196633	EDLVL_BS	EDLVL_BSTRUE	1	0.21447	19	0.799049	0.789474	0.996792	1.79176	1.44338	1.24137
NA	X6_115024	DSUBFED	DSUBFED	1	0.214577	108	0.636757	0.157407	1.18299	-0.625166	0.503728	-1.24108
Tongue dorsum	X6_145806	BMI_CAT	BMI_CATobese	1	0.215351	128	0.794532	0.765625	1.37968	-0.904654	0.730158	-1.23898
Buccal mucosa	X6_99853	BMI_CAT	BMI_CATobese	1	0.215666	116	0.761417	0.784483	1.3928	-0.882058	0.712408	-1.23814
Tongue dorsum	X7_123707	DCMCODE_13	DCMCODE_13TRUE	1	0.215673	33	1	0.454545	0.641541	-1.65632	1.33777	-1.23812
NA	X6_128368	DSUBFED	DSUBFED	1	0.216331	108	0.658986	0.833333	1.18299	0.649222	0.525114	1.23634
Retroauricular crease	X6_103923	OCPTN_ST	OCPTN_STTRUE	1	0.216342	13	1	0.384615	1	1.67398	1.35401	1.23631
NA	X6_60553	DSUBFED	DSUBFED	1	0.21657	108	0.888339	0.703704	1.18299	0.526134	0.425778	1.2357
Buccal mucosa	X6_81136	MURICA	MURICATRUE	1	0.216603	116	0.366896	0.931034	0.53827	1.09915	0.889562	1.23561
Tongue dorsum	X6_70847	BMI_CAT	BMI_CATobese	1	0.216783	128	0.92311	0.328125	1.37968	0.769316	0.622864	1.23513
NA	X6_65847	MURICA	MURICATRUE	1	0.216843	111	0.993454	0.423423	0.500955	-0.772924	0.625866	-1.23497
Supragingival plaque	X7_81985	DSUDIET	DSUDIET	1	0.217053	117	0.952978	0.641026	0.258144	-0.585646	0.474437	-1.2344
Supragingival plaque	X6_25433	BMI_CAT	BMI_CAToverweight	1	0.217328	120	1	0.475	1.41039	-0.517219	0.419254	-1.23366
Supragingival plaque	X6_135880	BMI_CAT	BMI_CATobese	1	0.217341	120	0.846737	0.266667	1.41039	-1.01675	0.824193	-1.23363
Tongue dorsum	X6_159659	OCPTN_ST	OCPTN_STTRUE	1	0.217347	32	0.728333	0.8125	0.999666	1.4967	1.21327	1.23361
Tongue dorsum	X6_76803	OCPTN_ST	OCPTN_STTRUE	1	0.217347	32	0.728333	0.1875	0.999666	-1.4967	1.21327	-1.23361
Tongue dorsum	X6_25433	OCPTN_ST	OCPTN_STTRUE	1	0.217347	32	0.728333	0.8125	0.999666	1.4967	1.21327	1.23361
Tongue dorsum	X6_182765	OCPTN_ST	OCPTN_STTRUE	1	0.217378	32	0.654542	0.15625	0.999666	1.54045	1.24881	1.23353
Nares	X6_110798	MURICA	MURICATRUE	1	0.217409	92	0.998364	0.434783	0.504173	-0.869352	0.704815	-1.23345
Tongue dorsum	X6_122071	BMI_CAT	BMI_CATobese	1	0.2179	128	0.736519	0.203125	1.37968	-1.3394	1.08706	-1.23213
NA	X6_63487	DSUBFED	DSUBFED	1	0.218004	108	0.680311	0.175926	1.18299	-0.636821	0.516961	-1.23185
Tongue dorsum	X6_63870	BMI_CAT	BMI_CAToverweight	1	0.218469	128	1	0.523438	1.37968	0.474523	0.3856	1.23061
Buccal mucosa	X6_90240	BMI_CAT	BMI_CATobese	1	0.218918	116	0.872178	0.715517	1.3928	-0.82166	0.668337	-1.22941
NA	X6_174427	DSUBFED	DSUBFED	1	0.219163	108	0.700769	0.185185	1.18299	-0.626196	0.509618	-1.22876
NA	X6_119084	BMI_CAT	BMI_CATobese	1	0.219253	111	0.825497	0.252252	1.43492	-0.999952	0.81395	-1.22852
Supragingival plaque	X6_59371	MURICA	MURICATRUE	1	0.219703	120	0.76326	0.216667	0.501139	1.31036	1.06766	1.22732
Tongue dorsum	X6_103412	DSUDIET	DSUDIET	1	0.220874	124	0.998739	0.556452	0.24689	-0.707636	0.578035	-1.22421
Posterior fornix	X6_208036	MURICA	MURICATRUE	1	0.221087	59	0.297758	0.0508475	0.429645	-1.7492	1.4295	-1.22364
Posterior fornix	X6_99092	MURICA	MURICATRUE	1	0.221087	59	0.297758	0.0508475	0.429645	-1.7492	1.4295	-1.22364
NA	X6_157953	DCMCODE_13	DCMCODE_13TRUE	1	0.221621	46	0.937734	0.673913	0.688113	1.37372	1.12394	1.22223
Tongue dorsum	X6_109231	DSUDIET	DSUDIET	1	0.221853	124	0.604824	0.854839	0.24689	-0.595081	0.487126	-1.22162
Supragingival plaque	X6_184360	MURICA	MURICATRUE	1	0.221975	120	0.998498	0.558333	0.501139	-0.790696	0.647425	-1.22129
NA	X6_135930	MURICA	MURICATRUE	1	0.222511	111	0.411615	0.918919	0.500955	1.08177	0.886784	1.21988
Supragingival plaque	X6_85044	OCPTN_ST	OCPTN_STTRUE	1	0.22255	23	0.802859	0.217391	1	-1.38629	1.13652	-1.21978
Supragingival plaque	X6_91953	OCPTN_ST	OCPTN_STTRUE	1	0.22255	23	0.802859	0.217391	1	-1.38629	1.13652	-1.21978
Tongue dorsum	X6_196633	OCPTN_ST	OCPTN_STTRUE	1	0.222976	32	0.792288	0.78125	0.999666	-1.55401	1.27518	-1.21865
Supragingival plaque	X6_85714	DSUBFED	DSUBFED	1	0.223147	117	0.952978	0.641026	1.28041	0.419557	0.344407	1.2182
NA	X6_183641	DSUBFED	DSUBFED	1	0.223312	108	0.836711	0.259259	1.18299	0.529339	0.43468	1.21777
Posterior fornix	X6_177585	BMI_CAT	BMI_CATobese	1	0.223317	59	0.297758	0.0508475	1.46579	2.05304	1.68592	1.21776
Tongue dorsum	X6_72839	MURICA	MURICATRUE	1	0.223413	128	0.454231	0.90625	0.52739	0.909396	0.746935	1.2175
NA	X6_59371	BMI_CAT	BMI_CATobese	1	0.223844	111	0.877715	0.288288	1.43492	0.742316	0.610272	1.21637
Supragingival plaque	X6_93518	DSUBFED	DSUBFED	1	0.224036	117	1	0.504274	1.28041	0.398308	0.327592	1.21587
NA	X6_84398	BMI_CAT	BMI_CATobese	1	0.224397	111	0.996554	0.432432	1.43492	0.716351	0.589628	1.21492
NA	X6_56347	DSUBFED	DSUBFED	1	0.224404	108	0.739221	0.796296	1.18299	0.564079	0.464301	1.2149
Buccal mucosa	X6_212883	DSUBFED	DSUBFED	1	0.224591	113	0.373951	0.0707965	1.30913	0.827114	0.681084	1.21441
Tongue dorsum	X6_116723	DSUBFED	DSUBFED	1	0.2249	124	0.807634	0.241935	1.27848	-0.513484	0.423108	-1.2136
NA	X6_27580	DCMCODE_13	DCMCODE_13TRUE	1	0.226581	46	1	0.434783	0.688113	-1.08016	0.893278	-1.20921
NA	X6_56043	BMI_CAT	BMI_CATobese	1	0.226808	111	0.825497	0.747748	1.43492	-0.739113	0.611534	-1.20862
Tongue dorsum	X6_65847	OCPTN_ST	OCPTN_STTRUE	1	0.227535	32	0.569406	0.125	0.999666	1.54526	1.28054	1.20673
Supragingival plaque	X6_90845	BMI_CAT	BMI_CAToverweight	1	0.227574	120	1	0.466667	1.41039	-0.494922	0.410169	-1.20663
Supragingival plaque	X6_199263	DSUDIET	DSUDIET	1	0.227589	117	0.396409	0.0769231	0.258144	0.743274	0.616011	1.20659
Buccal mucosa	X6_196036	BMI_CAT	BMI_CAToverweight	1	0.227819	116	0.992704	0.577586	1.3928	-0.491329	0.407405	-1.20599
Supragingival plaque	X6_70847	BMI_CAT	BMI_CAToverweight	1	0.227835	120	0.965286	0.375	1.41039	-0.517376	0.429017	-1.20596
NA	X6_128368	BMI_CAT	BMI_CATobese	1	0.227981	111	0.669225	0.828829	1.43492	1.31069	1.08719	1.20558
Tongue dorsum	X6_62357	DCMCODE_13	DCMCODE_13TRUE	1	0.228406	33	1	0.454545	0.641541	-1.43211	1.18899	-1.20448
NA	X6_76152	DSUBFED	DSUBFED	1	0.22848	108	0.510338	0.888889	1.18299	0.785565	0.65231	1.20428
NA	X6_90240	DCMCODE_13	DCMCODE_13TRUE	1	0.229072	46	0.937734	0.673913	0.688113	-0.970208	0.806656	-1.20275
Supragingival plaque	X6_36193	OCPTN_ST	OCPTN_STTRUE	1	0.229114	23	0.70964	0.173913	1	-1.52334	1.26666	-1.20265
Supragingival plaque	X6_41475	OCPTN_ST	OCPTN_STTRUE	1	0.229114	23	0.70964	0.173913	1	-1.52334	1.26666	-1.20265
Retroauricular crease	X6_49947	DSUBFED	DSUBFED	1	0.229866	23	0.70964	0.173913	1.55818	1.22197	1.01771	1.2007
Retroauricular crease	X6_81136	DSUBFED	DSUBFED	1	0.229866	23	0.70964	0.173913	1.55818	1.22197	1.01771	1.2007
NA	X6_149008	DSUBFED	DSUBFED	1	0.229981	108	0.999433	0.444444	1.18299	-0.454346	0.378493	-1.20041
NA	X6_33024	MURICA	MURICATRUE	1	0.230284	111	1	0.495495	0.500955	0.77606	0.646918	1.19963
Supragingival plaque	X7_21650	BMI_CAT	BMI_CATobese	1	0.23081	120	1	0.466667	1.41039	-0.77335	0.645387	-1.19827
Nares	X7_53884	DSUBFED	DSUBFED	1	0.230905	88	0.159384	0.0227273	1.36952	1.58346	1.32172	1.19803
Nares	X6_97267	DSUBFED	DSUBFED	1	0.230905	88	0.159384	0.0227273	1.36952	1.58346	1.32172	1.19803
Nares	X6_117494	DSUBFED	DSUBFED	1	0.230905	88	0.159384	0.0227273	1.36952	1.58346	1.32172	1.19803
Nares	X6_128749	DSUBFED	DSUBFED	1	0.230905	88	0.159384	0.0227273	1.36952	1.58346	1.32172	1.19803
Nares	X6_156982	DSUBFED	DSUBFED	1	0.230905	88	0.159384	0.0227273	1.36952	1.58346	1.32172	1.19803
Nares	X6_196036	DSUBFED	DSUBFED	1	0.230905	88	0.159384	0.0227273	1.36952	1.58346	1.32172	1.19803
Nares	X6_149327	DSUBFED	DSUBFED	1	0.230905	88	0.159384	0.0227273	1.36952	1.58346	1.32172	1.19803
Nares	X6_90097	DSUBFED	DSUBFED	1	0.230905	88	0.159384	0.0227273	1.36952	1.58346	1.32172	1.19803
NA	X6_157953	BMI_CAT	BMI_CATobese	1	0.230942	111	0.954704	0.63964	1.43492	-0.701276	0.585404	-1.19794
NA	X6_194344	DSUBFED	DSUBFED	1	0.231568	108	0.850567	0.268519	1.18299	0.516266	0.431541	1.19633
Nares	X6_39457	DCMCODE_13	DCMCODE_13TRUE	1	0.231616	19	0.678954	0.157895	0.8916	1.67398	1.3994	1.19621
Buccal mucosa	X6_25913	DSUBFED	DSUBFED	1	0.231881	113	0.923693	0.672566	1.30913	-0.411268	0.344006	-1.19553
Tongue dorsum	X7_123707	OCPTN_ST	OCPTN_STTRUE	1	0.232079	32	1	0.4375	0.999666	-1.0649	0.891117	-1.19502
NA	X6_128085	MURICA	MURICATRUE	1	0.232091	111	0.985228	0.405405	0.500955	0.838364	0.701565	1.19499
NA	X6_97505	OCPTN_ST	OCPTN_STTRUE	1	0.232543	46	0.989588	0.608696	1	-0.759177	0.635916	-1.19383
Posterior fornix	X6_173132	BMI_CAT	BMI_CATobese	1	0.232566	59	0.631809	0.152542	1.46579	1.2764	1.06921	1.19377
Nares	X6_75619	DSUBFED	DSUBFED	1	0.232587	88	0.218415	0.0340909	1.36952	-1.31777	1.10392	-1.19372
Tongue dorsum	X6_159659	BMI_CAT	BMI_CATobese	1	0.23285	128	0.720675	0.804688	1.37968	1.29453	1.08506	1.19305
NA	X6_114478	OCPTN_ST	OCPTN_STTRUE	1	0.232967	46	0.688113	0.173913	1	-1.07933	0.904912	-1.19275
NA	X6_105476	BMI_CAT	BMI_CATobese	1	0.233677	111	1	0.486486	1.43492	0.713392	0.599015	1.19094
Tongue dorsum	X6_103412	BMI_CAT	BMI_CAToverweight	1	0.234453	128	0.99992	0.546875	1.37968	0.481015	0.404565	1.18897
NA	X6_56715	DSUBFED	DSUBFED	1	0.236848	108	0.45138	0.0925926	1.18299	0.712766	0.602557	1.1829
Tongue dorsum	X6_64207	BMI_CAT	BMI_CATobese	1	0.237149	128	0.914776	0.679688	1.37968	-0.784755	0.66384	-1.18214
NA	X6_95788	BMI_CAT	BMI_CAToverweight	1	0.237679	111	0.954704	0.63964	1.43492	0.547773	0.463897	1.18081
Tongue dorsum	X6_128085	BMI_CAT	BMI_CATobese	1	0.237989	128	0.914776	0.679688	1.37968	0.963941	0.816879	1.18003
Supragingival plaque	X6_124558	DSUBFED	DSUBFED	1	0.238299	117	0.605614	0.145299	1.28041	-0.583408	0.494728	-1.17925
NA	X6_39471	BMI_CAT	BMI_CATobese	1	0.238539	111	0.745871	0.792793	1.43492	0.984525	0.835301	1.17865
NA	X6_181184	BMI_CAT	BMI_CATobese	1	0.238618	111	0.669225	0.171171	1.43492	0.821546	0.697142	1.17845
Tongue dorsum	X6_144884	MURICA	MURICATRUE	1	0.238949	128	1	0.523438	0.52739	0.720861	0.612134	1.17762
Buccal mucosa	X6_37924	BMI_CAT	BMI_CATobese	1	0.239099	116	0.727606	0.198276	1.3928	-1.30264	1.10652	-1.17724
Tongue dorsum	X6_188170	BMI_CAT	BMI_CATobese	1	0.239104	128	0.704263	0.1875	1.37968	0.859045	0.729717	1.17723
Nares	X6_62357	MURICA	MURICATRUE	1	0.239523	92	0.78728	0.228261	0.504173	-0.947113	0.805245	-1.17618
Tongue dorsum	X6_105225	BMI_CAT	BMI_CAToverweight	1	0.240294	128	0.844573	0.734375	1.37968	0.52209	0.444615	1.17425
Retroauricular crease	X6_49238	BMI_CAT	BMI_CATobese	1	0.240947	26	1	0.461538	1.35031	-1.45358	1.23959	-1.17262
Nares	X6_199978	DSUBFED	DSUBFED	1	0.241456	88	0.159384	0.0227273	1.36952	1.35509	1.15686	1.17135
Nares	X6_99092	DSUBFED	DSUBFED	1	0.241456	88	0.159384	0.0227273	1.36952	1.35509	1.15686	1.17135
Nares	X6_84046	DSUBFED	DSUBFED	1	0.241456	88	0.159384	0.0227273	1.36952	1.35509	1.15686	1.17135
Tongue dorsum	X6_24671	BMI_CAT	BMI_CATobese	1	0.242799	128	0.997136	0.4375	1.37968	-0.763412	0.653595	-1.16802
Tongue dorsum	X6_104115	DSUDIET	DSUDIET	1	0.243838	124	0.926029	0.669355	0.24689	-0.548734	0.470836	-1.16545
Tongue dorsum	X6_103418	BMI_CAT	BMI_CAToverweight	1	0.243994	128	0.400306	0.078125	1.37968	0.790109	0.678169	1.16506
Buccal mucosa	X6_209274	DSUBFED	DSUBFED	1	0.24422	113	0.720476	0.19469	1.30913	0.46294	0.397543	1.1645
NA	X6_122057	DSUBFED	DSUBFED	1	0.244755	108	0.969718	0.37963	1.18299	-0.444402	0.382057	-1.16318
Supragingival plaque	X6_37924	BMI_CAT	BMI_CATobese	1	0.24484	120	0.891811	0.7	1.41039	0.973623	0.837184	1.16297
NA	X6_57750	BMI_CAT	BMI_CATobese	1	0.244903	111	1	0.540541	1.43492	0.68678	0.590616	1.16282
Tongue dorsum	X6_199978	BMI_CAT	BMI_CAToverweight	1	0.244914	128	1	0.507812	1.37968	-0.458421	0.394242	-1.16279
Buccal mucosa	X6_184627	DSUBFED	DSUBFED	1	0.245948	113	0.99997	0.451327	1.30913	-0.38377	0.330766	-1.16025
NA	X7_213859	BMI_CAT	BMI_CATobese	1	0.246527	111	0.974651	0.612613	1.43492	0.708496	0.611391	1.15883
Supragingival plaque	X6_49947	BMI_CAT	BMI_CATobese	1	0.246692	120	0.821115	0.75	1.41039	-0.80247	0.692728	-1.15842
Tongue dorsum	X6_72839	BMI_CAT	BMI_CAToverweight	1	0.246755	128	0.454231	0.90625	1.37968	0.828954	0.715685	1.15827
Supragingival plaque	X6_197923	BMI_CAT	BMI_CAToverweight	1	0.247071	120	0.846737	0.266667	1.41039	0.551575	0.476526	1.15749
NA	X6_202734	OCPTN_ST	OCPTN_STTRUE	1	0.247408	46	0.97611	0.630435	1	0.774757	0.669818	1.15667
NA	X6_104327	BMI_CAT	BMI_CAToverweight	1	0.247734	111	0.745871	0.792793	1.43492	0.620304	0.536655	1.15587
NA	X6_184881	DCMCODE_13	DCMCODE_13TRUE	1	0.247816	46	0.913278	0.304348	0.688113	0.950873	0.82279	1.15567
Buccal mucosa	X6_58645	OCPTN_ST	OCPTN_STTRUE	1	0.248482	22	0.991076	0.363636	1	1.14226	0.989791	1.15404
Supragingival plaque	X6_76803	MURICA	MURICATRUE	1	0.248866	120	1	0.483333	0.501139	0.742986	0.644333	1.15311
Tongue dorsum	X7_107714	EDLVL_BS	EDLVL_BSTRUE	1	0.249204	19	0.8916	0.263158	0.996792	-1.31244	1.13899	-1.15229
Tongue dorsum	X6_58175	EDLVL_BS	EDLVL_BSTRUE	1	0.249204	19	0.8916	0.263158	0.996792	-1.31244	1.13899	-1.15229
Tongue dorsum	X6_113993	BMI_CAT	BMI_CAToverweight	1	0.249424	128	0.95872	0.632812	1.37968	0.460016	0.399406	1.15175
Tongue dorsum	X6_158772	BMI_CAT	BMI_CAToverweight	1	0.249673	128	0.736519	0.796875	1.37968	-0.565794	0.491506	-1.15114
Buccal mucosa	X6_202842	DSUBFED	DSUBFED	1	0.250151	113	1	0.495575	1.30913	-0.377348	0.328134	-1.14998
NA	X6_62025	OCPTN_ST	OCPTN_STTRUE	1	0.250252	46	0.577004	0.869565	1	-1.09861	0.955533	-1.14974
NA	X6_122071	DSUBFED	DSUBFED	1	0.251047	108	0.910474	0.314815	1.18299	-0.475181	0.413989	-1.14781
Buccal mucosa	X6_26486	DSUBFED	DSUBFED	1	0.251408	113	0.772316	0.221239	1.30913	0.464553	0.405038	1.14694
Tongue dorsum	X6_79208	BMI_CAT	BMI_CAToverweight	1	0.251665	128	0.400306	0.078125	1.37968	0.870352	0.75926	1.14632
Supragingival plaque	X6_63487	MURICA	MURICATRUE	1	0.252511	120	0.617448	0.15	0.501139	-0.867774	0.758364	-1.14427
NA	X6_84398	DSUBFED	DSUBFED	1	0.252821	108	0.994602	0.425926	1.18299	0.427964	0.37425	1.14352
NA	X7_147498	MURICA	MURICATRUE	1	0.253534	111	0.745871	0.207207	0.500955	-0.760249	0.665828	-1.14181
NA	X6_42437	DSUBFED	DSUBFED	1	0.254177	108	0.739221	0.796296	1.18299	-0.550729	0.482984	-1.14026
Supragingival plaque	X6_76803	OCPTN_ST	OCPTN_STTRUE	1	0.254346	23	1	0.434783	1	1.03207	0.905441	1.13986
Supragingival plaque	X6_49238	OCPTN_ST	OCPTN_STTRUE	1	0.255137	23	0.878239	0.26087	1	-1.17146	1.02944	-1.13796
NA	X6_89989	BMI_CAT	BMI_CATobese	1	0.255256	111	1	0.486486	1.43492	-0.692145	0.608385	-1.13768
NA	X6_69531	DSUBFED	DSUBFED	1	0.255497	108	0.920655	0.324074	1.18299	0.447016	0.39312	1.1371
Buccal mucosa	X6_39471	BMI_CAT	BMI_CATobese	1	0.256013	116	0.979869	0.603448	1.3928	-0.73841	0.650086	-1.13586
NA	X6_157953	OCPTN_ST	OCPTN_STTRUE	1	0.256228	46	0.937734	0.673913	1	0.778642	0.685816	1.13535
Tongue dorsum	X6_156982	BMI_CAT	BMI_CATobese	1	0.256345	128	0.807761	0.757812	1.37968	-0.829249	0.730569	-1.13507
NA	X7_125528	MURICA	MURICATRUE	1	0.256405	111	0.889288	0.297297	0.500955	0.926279	0.816156	1.13493
Supragingival plaque	X6_59371	DSUBFED	DSUBFED	1	0.256824	117	0.741282	0.205128	1.28041	-0.467517	0.412298	-1.13393
Nares	X6_30143	BMI_CAT	BMI_CAToverweight	1	0.256951	92	1	0.478261	1.44118	-0.519784	0.458514	-1.13363
NA	X6_121134	DSUBFED	DSUBFED	1	0.257141	108	0.990908	0.583333	1.18299	-0.427163	0.376962	-1.13317
Buccal mucosa	X6_72946	MURICA	MURICATRUE	1	0.257292	116	0.883494	0.293103	0.53827	-0.665539	0.587509	-1.13281
Buccal mucosa	X6_109231	OCPTN_ST	OCPTN_STTRUE	1	0.258281	22	0.954434	0.318182	1	-1.09861	0.971825	-1.13046
Buccal mucosa	X6_142117	OCPTN_ST	OCPTN_STTRUE	1	0.258281	22	0.954434	0.318182	1	-1.09861	0.971825	-1.13046
Buccal mucosa	X6_173979	OCPTN_ST	OCPTN_STTRUE	1	0.258281	22	0.954434	0.318182	1	-1.09861	0.971825	-1.13046
Buccal mucosa	X6_63870	OCPTN_ST	OCPTN_STTRUE	1	0.258281	22	0.954434	0.318182	1	-1.09861	0.971825	-1.13046
Buccal mucosa	X6_145806	BMI_CAT	BMI_CATobese	1	0.258445	116	0.974547	0.612069	1.3928	-0.733268	0.648868	-1.13007
Buccal mucosa	X6_56668	BMI_CAT	BMI_CAToverweight	1	0.25889	116	0.458349	0.0948276	1.3928	-0.959302	0.849679	-1.12902
Supragingival plaque	X6_65847	BMI_CAT	BMI_CAToverweight	1	0.2593	120	0.526265	0.116667	1.41039	-0.791927	0.702034	-1.12805
Tongue dorsum	X6_66547	DSUDIET	DSUDIET	1	0.259645	124	0.625306	0.846774	0.24689	-0.549429	0.487415	-1.12723
Supragingival plaque	X6_158611	DSUBFED	DSUBFED	1	0.260111	117	0.535213	0.119658	1.28041	0.621937	0.552279	1.12613
Tongue dorsum	X6_177609	MURICA	MURICATRUE	1	0.260283	128	0.877262	0.289062	0.52739	0.906518	0.805277	1.12572
NA	X6_86151	BMI_CAT	BMI_CAToverweight	1	0.260567	111	0.709098	0.810811	1.43492	0.650371	0.57808	1.12505
Tongue dorsum	X6_69531	DCMCODE_13	DCMCODE_13TRUE	1	0.260805	33	0.979869	0.363636	0.641541	1.14324	1.01668	1.12449
Buccal mucosa	X7_102617	BMI_CAT	BMI_CAToverweight	1	0.260827	116	0.984684	0.405172	1.3928	0.455771	0.405332	1.12444
Supragingival plaque	X6_72839	BMI_CAT	BMI_CAToverweight	1	0.262183	120	0.965286	0.625	1.41039	-0.478226	0.426513	-1.12125
Supragingival plaque	X6_177609	OCPTN_ST	OCPTN_STTRUE	1	0.263234	23	0.937186	0.695652	1	-1.17578	1.05094	-1.11878
Tongue dorsum	X6_208903	BMI_CAT	BMI_CAToverweight	1	0.263359	128	0.92311	0.671875	1.37968	-0.457224	0.408788	-1.11849
NA	X6_110310	BMI_CAT	BMI_CAToverweight	1	0.263593	111	0.999951	0.45045	1.43492	-0.480992	0.430249	-1.11794
Buccal mucosa	X6_184360	BMI_CAT	BMI_CATobese	1	0.264757	116	0.608911	0.146552	1.3928	-1.24132	1.11307	-1.11522
Supragingival plaque	X6_90688	DSUDIET	DSUDIET	1	0.265543	117	0.455622	0.0940171	0.258144	0.687396	0.617393	1.11338
NA	X6_62357	BMI_CAT	BMI_CATobese	1	0.265646	111	0.76316	0.783784	1.43492	0.906562	0.814415	1.11315
Nares	X6_213320	MURICA	MURICATRUE	1	0.265736	92	0.433354	0.0869565	0.504173	-1.60559	1.44266	-1.11294
NA	X6_127818	OCPTN_ST	OCPTN_STTRUE	1	0.265847	46	1	0.456522	1	0.696446	0.62592	1.11268
Supragingival plaque	X6_194344	BMI_CAT	BMI_CAToverweight	1	0.265999	120	0.526265	0.883333	1.41039	-0.654754	0.588636	-1.11232
NA	X6_144436	BMI_CAT	BMI_CATobese	1	0.266125	111	0.865561	0.279279	1.43492	-0.91059	0.818853	-1.11203
Tongue dorsum	X6_76803	MURICA	MURICATRUE	1	0.266408	128	0.720675	0.195312	0.52739	1.18879	1.06966	1.11137
Supragingival plaque	X6_159261	DSUBFED	DSUBFED	1	0.266538	117	0.901356	0.307692	1.28041	0.404547	0.364106	1.11107
Supragingival plaque	X6_135314	DSUDIET	DSUDIET	1	0.266602	117	0.741282	0.205128	0.258144	0.532539	0.479367	1.11092
Supragingival plaque	X6_144816	MURICA	MURICATRUE	1	0.266608	120	0.695803	0.183333	0.501139	-0.732314	0.659203	-1.11091
Supragingival plaque	X6_91953	BMI_CAT	BMI_CAToverweight	1	0.266614	120	0.573618	0.133333	1.41039	0.630967	0.567981	1.11089
NA	X6_116067	DSUBFED	DSUBFED	1	0.266856	108	0.791149	0.768519	1.18299	0.490507	0.441766	1.11033
Tongue dorsum	X6_37924	OCPTN_ST	OCPTN_STTRUE	1	0.266859	32	0.933587	0.6875	0.999666	-1.32339	1.19189	-1.11033
Buccal mucosa	X6_39457	DSUBFED	DSUBFED	1	0.26699	113	0.720476	0.19469	1.30913	0.491042	0.442372	1.11002
Buccal mucosa	X6_70847	OCPTN_ST	OCPTN_STTRUE	1	0.267172	22	0.823617	0.227273	1	1.43203	1.29058	1.1096
Buccal mucosa	X6_144884	OCPTN_ST	OCPTN_STTRUE	1	0.267172	22	0.823617	0.772727	1	-1.43203	1.29058	-1.1096
Nares	X6_110798	BMI_CAT	BMI_CAToverweight	1	0.267354	92	0.998364	0.434783	1.44118	-0.516193	0.465384	-1.10918
Tongue dorsum	X6_117494	BMI_CAT	BMI_CAToverweight	1	0.267599	128	0.820505	0.75	1.37968	-0.487043	0.439328	-1.10861
Nares	X6_141640	DSUBFED	DSUBFED	1	0.268186	88	0.447164	0.0909091	1.36952	-1.03383	0.933688	-1.10725
NA	X6_152703	MURICA	MURICATRUE	1	0.268205	111	0.76316	0.216216	0.500955	1.18677	1.07186	1.10721
Buccal mucosa	X6_104618	BMI_CAT	BMI_CAToverweight	1	0.268212	116	0.709685	0.189655	1.3928	0.539571	0.487333	1.10719
Tongue dorsum	X6_205297	DSUDIET	DSUDIET	1	0.268472	124	1	0.491935	0.24689	-0.631465	0.570641	-1.10659
Supragingival plaque	X6_205407	BMI_CAT	BMI_CATobese	1	0.268483	120	0.834192	0.741667	1.41039	-0.71125	0.642756	-1.10656
Tongue dorsum	X6_64207	OCPTN_ST	OCPTN_STTRUE	1	0.269048	32	0.894393	0.71875	0.999666	1.04728	0.947541	1.10526
NA	X6_181184	OCPTN_ST	OCPTN_STTRUE	1	0.269357	46	0.635305	0.152174	1	0.993304	0.899288	1.10454
NA	X6_96390	OCPTN_ST	OCPTN_STTRUE	1	0.269357	46	0.635305	0.152174	1	0.993304	0.899288	1.10454
NA	X6_86151	DSUBFED	DSUBFED	1	0.269784	108	0.720396	0.805556	1.18299	0.539738	0.489088	1.10356
Supragingival plaque	X6_111258	MURICA	MURICATRUE	1	0.270152	120	0.858763	0.725	0.501139	-0.886348	0.803789	-1.10271
Supragingival plaque	X6_105225	OCPTN_ST	OCPTN_STTRUE	1	0.270238	23	0.595609	0.130435	1	-1.50408	1.36423	-1.10251
NA	X6_119084	DCMCODE_13	DCMCODE_13TRUE	1	0.270411	46	0.885327	0.282609	0.688113	-1.25152	1.13556	-1.10212
Supragingival plaque	X6_108247	BMI_CAT	BMI_CAToverweight	1	0.270604	120	0.677298	0.175	1.41039	0.564227	0.512155	1.10167
Supragingival plaque	X6_33024	DSUDIET	DSUDIET	1	0.270785	117	0.803802	0.239316	0.258144	0.534104	0.484995	1.10126
Supragingival plaque	X7_76396	BMI_CAT	BMI_CATobese	1	0.271465	120	0.573618	0.133333	1.41039	-1.19971	1.09095	-1.0997
Buccal mucosa	X6_199448	OCPTN_ST	OCPTN_STTRUE	1	0.271937	22	1	0.545455	1	-1.09861	1	-1.09861
Supragingival plaque	X6_199448	MURICA	MURICATRUE	1	0.271992	120	0.981532	0.6	0.501139	-0.73794	0.671779	-1.09849
Tongue dorsum	X6_24671	EDLVL_BS	EDLVL_BSTRUE	1	0.27233	19	0.996792	0.368421	0.996792	-1.15769	1.05464	-1.09771
Tongue dorsum	X7_102617	EDLVL_BS	EDLVL_BSTRUE	1	0.272358	19	1	0.578947	0.996792	1.15823	1.0552	1.09765
Tongue dorsum	X6_27154	EDLVL_BS	EDLVL_BSTRUE	1	0.272358	19	1	0.526316	0.996792	-1.15823	1.0552	-1.09765
Tongue dorsum	X6_205297	DSUBFED	DSUBFED	1	0.272583	124	1	0.491935	1.27848	-0.349093	0.318187	-1.09713
NA	X6_95094	DCMCODE_13	DCMCODE_13TRUE	1	0.272822	46	0.266976	0.956522	0.688113	-1.62824	1.48483	-1.09659
NA	X6_147771	BMI_CAT	BMI_CATobese	1	0.273227	111	0.727858	0.198198	1.43492	-1.19288	1.08873	-1.09566
Buccal mucosa	X6_127775	BMI_CAT	BMI_CATobese	1	0.273503	116	0.53827	0.12069	1.3928	0.865644	0.790521	1.09503
NA	X6_60553	DCMCODE_13	DCMCODE_13TRUE	1	0.273916	46	0.818534	0.76087	0.688113	-0.938911	0.858167	-1.09409
Supragingival plaque	X6_209274	BMI_CAT	BMI_CAToverweight	1	0.274061	120	0.993447	0.575	1.41039	-0.439802	0.402101	-1.09376
Buccal mucosa	X6_179701	BMI_CAT	BMI_CAToverweight	1	0.275113	116	0.398856	0.0775862	1.3928	0.830973	0.761408	1.09136
Tongue dorsum	X6_113993	OCPTN_ST	OCPTN_STTRUE	1	0.275493	32	0.792288	0.78125	0.999666	1.09418	1.00338	1.0905
Nares	X6_31735	DSUBFED	DSUBFED	1	0.275966	88	0.159384	0.0227273	1.36952	-1.74296	1.59989	-1.08943
Supragingival plaque	X6_42014	OCPTN_ST	OCPTN_STTRUE	1	0.275983	23	0.70964	0.173913	1	-1.47733	1.35611	-1.08939
Tongue dorsum	X6_127775	DSUDIET	DSUDIET	1	0.276108	124	0.490094	0.104839	0.24689	0.67722	0.621813	1.0891
Retroauricular crease	X6_31735	DSUBFED	DSUBFED	1	0.277393	23	0.595609	0.130435	1.55818	1.05651	0.972671	1.08619
Buccal mucosa	X6_57018	BMI_CAT	BMI_CATobese	1	0.277697	116	0.988974	0.413793	1.3928	-0.731925	0.67427	-1.08551
Nares	X6_202842	MURICA	MURICATRUE	1	0.278136	92	0.210925	0.0326087	0.504173	-1.47456	1.35964	-1.08452
NA	X6_211583	OCPTN_ST	OCPTN_STTRUE	1	0.278452	46	0.512449	0.891304	1	-1.12727	1.0401	-1.0838
NA	X6_49036	DSUBFED	DSUBFED	1	0.279035	108	0.419717	0.916667	1.18299	0.748657	0.691607	1.08249
NA	X6_97267	DSUBFED	DSUBFED	1	0.279035	108	0.419717	0.0833333	1.18299	-0.748657	0.691607	-1.08249
NA	X6_49947	OCPTN_ST	OCPTN_STTRUE	1	0.279297	46	0.577004	0.869565	1	1.26311	1.16749	1.0819
NA	X6_56715	OCPTN_ST	OCPTN_STTRUE	1	0.279297	46	0.577004	0.130435	1	-1.26311	1.16749	-1.0819
Tongue dorsum	X6_188170	OCPTN_ST	OCPTN_STTRUE	1	0.279834	32	0.847418	0.25	0.999666	0.966155	0.894015	1.08069
Tongue dorsum	X6_29169	MURICA	MURICATRUE	1	0.279875	128	0.807761	0.757812	0.52739	-0.858243	0.794228	-1.0806
Supragingival plaque	X6_184627	DSUBFED	DSUBFED	1	0.279898	117	0.72406	0.803419	1.28041	0.435374	0.402919	1.08055
NA	X6_153601	MURICA	MURICATRUE	1	0.279977	111	0.889288	0.297297	0.500955	0.874062	0.809039	1.08037
NA	X6_71475	MURICA	MURICATRUE	1	0.280069	111	0.910727	0.684685	0.500955	-0.873576	0.808743	-1.08016
Nares	X6_66547	DSUBFED	DSUBFED	1	0.28065	88	0.218415	0.0340909	1.36952	-1.4172	1.31361	-1.07886
Nares	X6_208036	DSUBFED	DSUBFED	1	0.28065	88	0.218415	0.0340909	1.36952	-1.4172	1.31361	-1.07886
Tongue dorsum	X6_56657	MURICA	MURICATRUE	1	0.280769	128	0.832772	0.257812	0.52739	-0.62923	0.58338	-1.07859
Supragingival plaque	X6_59371	OCPTN_ST	OCPTN_STTRUE	1	0.281153	23	0.999762	0.391304	1	-0.991043	0.919563	-1.07773
Supragingival plaque	X6_29169	OCPTN_ST	OCPTN_STTRUE	1	0.281153	23	0.999762	0.391304	1	-0.991043	0.919563	-1.07773
Supragingival plaque	X6_56668	DSUBFED	DSUBFED	1	0.281259	117	0.891019	0.299145	1.28041	0.398377	0.369725	1.0775
NA	X6_81136	DSUBFED	DSUBFED	1	0.281567	108	0.45138	0.0925926	1.18299	0.656582	0.609749	1.07681
Supragingival plaque	X6_36135	OCPTN_ST	OCPTN_STTRUE	1	0.282069	23	0.802859	0.217391	1	1.31799	1.22526	1.07568
NA	X6_44338	MURICA	MURICATRUE	1	0.282264	111	0.980219	0.603604	0.500955	-0.750753	0.698214	-1.07525
Supragingival plaque	X6_213963	DSUDIET	DSUDIET	1	0.282765	117	0.972279	0.384615	0.258144	0.50783	0.472783	1.07413
Supragingival plaque	X6_159659	BMI_CAT	BMI_CATobese	1	0.282789	120	1	0.508333	1.41039	-0.682177	0.63513	-1.07407
Tongue dorsum	X6_17925	DSUBFED	DSUBFED	1	0.283152	124	0.889479	0.298387	1.27848	-0.374541	0.348973	-1.07327
Tongue dorsum	X6_29169	DCMCODE_13	DCMCODE_13TRUE	1	0.283168	33	0.77847	0.787879	0.641541	-1.1151	1.03901	-1.07323
Tongue dorsum	X6_209274	DCMCODE_13	DCMCODE_13TRUE	1	0.283168	33	0.77847	0.212121	0.641541	1.1151	1.03901	1.07323
Supragingival plaque	X6_67816	MURICA	MURICATRUE	1	0.283409	120	1	0.491667	0.501139	-0.655799	0.611358	-1.07269
Nares	X6_205688	DSUBFED	DSUBFED	1	0.283622	88	0.32029	0.0568182	1.36952	-1.16176	1.08351	-1.07222
NA	X6_95788	BMI_CAT	BMI_CATobese	1	0.283799	111	0.954704	0.63964	1.43492	-0.637476	0.594758	-1.07182
Nares	X6_107271	DSUBFED	DSUBFED	1	0.283923	88	0.271564	0.0454545	1.36952	-1.25716	1.17322	-1.07155
Tongue dorsum	X6_154692	BMI_CAT	BMI_CATobese	1	0.28397	128	0.427837	0.914062	1.37968	-1.01118	0.943753	-1.07144
NA	X6_105225	MURICA	MURICATRUE	1	0.284256	111	0.603031	0.144144	0.500955	-0.783728	0.731904	-1.07081
Posterior fornix	X6_137666	DSUBFED	DSUBFED	1	0.28484	59	0.219402	0.0338983	1.06219	-1.53827	1.43829	-1.06951
Posterior fornix	X7_214048	DSUBFED	DSUBFED	1	0.28484	59	0.219402	0.0338983	1.06219	-1.53827	1.43829	-1.06951
Posterior fornix	X6_42014	DSUBFED	DSUBFED	1	0.28484	59	0.219402	0.0338983	1.06219	-1.53827	1.43829	-1.06951
Tongue dorsum	X6_127775	BMI_CAT	BMI_CAToverweight	1	0.285445	128	0.479575	0.101562	1.37968	-0.755021	0.706837	-1.06817
Nares	X6_202842	DSUBFED	DSUBFED	1	0.28571	88	0.218415	0.0340909	1.36952	1.01879	0.954298	1.06758
Buccal mucosa	X6_142117	BMI_CAT	BMI_CATobese	1	0.286422	116	0.792653	0.232759	1.3928	-0.902771	0.846874	-1.066
Buccal mucosa	X6_36135	DSUBFED	DSUBFED	1	0.286429	113	0.572444	0.132743	1.30913	-0.650021	0.609782	-1.06599
Tongue dorsum	X6_177609	BMI_CAT	BMI_CATobese	1	0.286494	128	0.877262	0.289062	1.37968	0.686315	0.643916	1.06584
Tongue dorsum	X6_37924	BMI_CAT	BMI_CAToverweight	1	0.28661	128	0.952396	0.640625	1.37968	0.44187	0.414673	1.06559
Supragingival plaque	X6_185741	DSUDIET	DSUDIET	1	0.286673	117	0.77378	0.222222	0.258144	0.511292	0.479884	1.06545
Buccal mucosa	X6_37924	MURICA	MURICATRUE	1	0.286814	116	0.727606	0.198276	0.53827	1.14583	1.07576	1.06514
Tongue dorsum	X6_56043	BMI_CAT	BMI_CAToverweight	1	0.287178	128	0.479575	0.898438	1.37968	-0.669044	0.628604	-1.06433
Nares	X6_53818	MURICA	MURICATRUE	1	0.287436	92	0.567788	0.130435	0.504173	-0.988695	0.929431	-1.06376
Tongue dorsum	X6_205407	OCPTN_ST	OCPTN_STTRUE	1	0.287452	32	0.792288	0.21875	0.999666	1.09861	1.0328	1.06373
NA	X6_135314	BMI_CAT	BMI_CATobese	1	0.287771	111	0.889288	0.702703	1.43492	0.746679	0.70241	1.06303
Nares	X6_49238	BMI_CAT	BMI_CAToverweight	1	0.288648	92	0.677345	0.173913	1.44118	-0.701585	0.661191	-1.06109
Tongue dorsum	X6_93460	BMI_CAT	BMI_CATobese	1	0.288796	128	0.896865	0.304688	1.37968	0.666473	0.628293	1.06077
NA	X6_85774	BMI_CAT	BMI_CATobese	1	0.289289	111	0.865561	0.720721	1.43492	0.744065	0.702158	1.05968
Tongue dorsum	X6_60151	MURICA	MURICATRUE	1	0.289452	128	0.454231	0.09375	0.52739	-0.971778	0.917356	-1.05933
Supragingival plaque	X6_159659	MURICA	MURICATRUE	1	0.289647	120	1	0.508333	0.501139	-0.65972	0.623026	-1.0589
NA	X6_145397	MURICA	MURICATRUE	1	0.290052	111	0.996554	0.567568	0.500955	0.658465	0.622363	1.05801
NA	X6_188170	BMI_CAT	BMI_CATobese	1	0.290563	111	0.968538	0.621622	1.43492	0.744804	0.704714	1.05689
Buccal mucosa	X6_24722	BMI_CAT	BMI_CATobese	1	0.290586	116	0.709685	0.189655	1.3928	-1.17181	1.10879	-1.05684
Tongue dorsum	X6_195894	BMI_CAT	BMI_CAToverweight	1	0.290767	128	0.887278	0.296875	1.37968	-0.446413	0.422564	-1.05644
Tongue dorsum	X6_70847	DSUBFED	DSUBFED	1	0.290852	124	0.908642	0.314516	1.27848	-0.362471	0.343167	-1.05625
Buccal mucosa	X6_196633	BMI_CAT	BMI_CAToverweight	1	0.291244	116	0.821452	0.75	1.3928	-0.489858	0.464145	-1.0554
Tongue dorsum	X6_144884	DSUDIET	DSUDIET	1	0.291665	124	1	0.532258	0.24689	-0.619749	0.587732	-1.05448
NA	X6_57750	DCMCODE_13	DCMCODE_13TRUE	1	0.291743	46	1	0.543478	0.688113	-0.850281	0.806485	-1.05431
Supragingival plaque	X6_135314	MURICA	MURICATRUE	1	0.291798	120	0.730802	0.2	0.501139	-0.690101	0.65463	-1.05418
NA	X6_128085	BMI_CAT	BMI_CATobese	1	0.291939	111	0.985228	0.405405	1.43492	0.624297	0.592381	1.05388
Buccal mucosa	X6_113953	DSUBFED	DSUBFED	1	0.29213	113	0.99997	0.548673	1.30913	-0.343367	0.325942	-1.05346
Buccal mucosa	X6_44338	DSUBFED	DSUBFED	1	0.292162	113	1	0.486726	1.30913	-0.345448	0.327939	-1.05339
Tongue dorsum	X6_39471	BMI_CAT	BMI_CATobese	1	0.29224	128	0.807761	0.757812	1.37968	-0.734016	0.696926	-1.05322
Supragingival plaque	X6_180603	DSUBFED	DSUBFED	1	0.292427	117	0.535213	0.119658	1.28041	-0.600389	0.570272	-1.05281
Tongue dorsum	X6_62357	DSUBFED	DSUBFED	1	0.292802	124	0.967859	0.379032	1.27848	-0.345467	0.328392	-1.05199
Supragingival plaque	X6_49947	MURICA	MURICATRUE	1	0.292881	120	0.821115	0.75	0.501139	0.652712	0.620553	1.05182
Supragingival plaque	X6_116723	DSUBFED	DSUBFED	1	0.293211	117	0.77378	0.777778	1.28041	-0.401664	0.382135	-1.0511
Tongue dorsum	X6_156982	OCPTN_ST	OCPTN_STTRUE	1	0.294683	32	0.728333	0.8125	0.999666	-1.12869	1.0771	-1.0479
NA	X6_116571	DCMCODE_13	DCMCODE_13TRUE	1	0.294788	46	1	0.565217	0.688113	0.930716	0.888362	1.04768
Tongue dorsum	X6_146554	DSUBFED	DSUBFED	1	0.295389	124	0.941677	0.653226	1.27848	-0.342953	0.327754	-1.04637
Supragingival plaque	X6_109231	DSUBFED	DSUBFED	1	0.295457	117	0.982729	0.598291	1.28041	-0.347822	0.332454	-1.04623
NA	X6_44338	DSUBFED	DSUBFED	1	0.295663	108	0.975908	0.611111	1.18299	0.39797	0.380549	1.04578
Supragingival plaque	X6_138599	BMI_CAT	BMI_CAToverweight	1	0.295727	120	0.526265	0.116667	1.41039	-0.742687	0.71027	-1.04564
Supragingival plaque	X6_85519	MURICA	MURICATRUE	1	0.296218	120	0.807497	0.241667	0.501139	-0.756528	0.724243	-1.04458
Buccal mucosa	X6_113953	BMI_CAT	BMI_CAToverweight	1	0.296841	116	0.998218	0.560345	1.3928	0.423455	0.405907	1.04323
Tongue dorsum	X6_158611	BMI_CAT	BMI_CATobese	1	0.297262	128	0.86681	0.28125	1.37968	0.669792	0.642596	1.04232
Tongue dorsum	X6_190669	BMI_CAT	BMI_CAToverweight	1	0.297497	128	0.427837	0.914062	1.37968	-0.802106	0.769911	-1.04182
Nares	X6_47906	DSUBFED	DSUBFED	1	0.297893	88	0.218415	0.0340909	1.36952	1.12862	1.08421	1.04096
Nares	X6_72618	DSUBFED	DSUBFED	1	0.297893	88	0.218415	0.0340909	1.36952	1.12862	1.08421	1.04096
Supragingival plaque	X6_30161	BMI_CAT	BMI_CATobese	1	0.298045	120	0.971161	0.383333	1.41039	-0.674114	0.647791	-1.04063
Tongue dorsum	X6_139150	BMI_CAT	BMI_CAToverweight	1	0.2988	128	0.613006	0.851562	1.37968	-0.551338	0.530638	-1.03901
Tongue dorsum	X6_213360	DSUBFED	DSUBFED	1	0.298808	124	0.717283	0.193548	1.27848	0.436019	0.419656	1.03899
Supragingival plaque	X6_109255	BMI_CAT	BMI_CATobese	1	0.299095	120	0.901845	0.308333	1.41039	-0.743998	0.716502	-1.03838
Supragingival plaque	X6_26486	BMI_CAT	BMI_CATobese	1	0.299527	120	0.944938	0.65	1.41039	-0.696041	0.670916	-1.03745
Tongue dorsum	X6_199978	DSUDIET	DSUDIET	1	0.299975	124	1	0.508065	0.24689	-0.599294	0.578197	-1.03649
Supragingival plaque	X6_63487	DSUBFED	DSUBFED	1	0.300828	117	0.627298	0.153846	1.28041	0.513582	0.496378	1.03466
NA	X7_53884	DSUBFED	DSUBFED	1	0.300879	108	0.510338	0.888889	1.18299	0.645458	0.623902	1.03455
Supragingival plaque	X6_26759	BMI_CAT	BMI_CAToverweight	1	0.301154	120	0.846737	0.266667	1.41039	0.463498	0.448274	1.03396
Tongue dorsum	X6_205407	DCMCODE_13	DCMCODE_13TRUE	1	0.301472	33	0.77847	0.212121	0.641541	1.38629	1.34164	1.03328
Tongue dorsum	X6_142117	DSUBFED	DSUBFED	1	0.301685	124	0.983022	0.403226	1.27848	0.34452	0.33357	1.03283
Supragingival plaque	X6_173132	BMI_CAT	BMI_CAToverweight	1	0.30203	120	0.807497	0.241667	1.41039	-0.516512	0.500452	-1.03209
Buccal mucosa	X6_69531	OCPTN_ST	OCPTN_STTRUE	1	0.302088	22	0.823617	0.227273	1	-1.09861	1.06458	-1.03197
Buccal mucosa	X6_154791	OCPTN_ST	OCPTN_STTRUE	1	0.302088	22	0.823617	0.227273	1	-1.09861	1.06458	-1.03197
Buccal mucosa	X6_159261	OCPTN_ST	OCPTN_STTRUE	1	0.302088	22	0.823617	0.227273	1	-1.09861	1.06458	-1.03197
Supragingival plaque	X6_91527	BMI_CAT	BMI_CATobese	1	0.302414	120	1	0.475	1.41039	0.647797	0.628155	1.03127
Supragingival plaque	X6_184360	OCPTN_ST	OCPTN_STTRUE	1	0.302601	23	0.999762	0.608696	1	-1.00996	0.979713	-1.03087
Supragingival plaque	X6_213360	OCPTN_ST	OCPTN_STTRUE	1	0.302601	23	0.999762	0.608696	1	-1.00996	0.979713	-1.03087
Supragingival plaque	X6_67816	OCPTN_ST	OCPTN_STTRUE	1	0.302601	23	0.999762	0.608696	1	-1.00996	0.979713	-1.03087
Supragingival plaque	X6_182765	OCPTN_ST	OCPTN_STTRUE	1	0.302601	23	0.999762	0.608696	1	-1.00996	0.979713	-1.03087
Tongue dorsum	X6_104115	DCMCODE_13	DCMCODE_13TRUE	1	0.302817	33	0.833765	0.757576	0.641541	-1.17696	1.14222	-1.03041
NA	X6_144436	MURICA	MURICATRUE	1	0.303056	111	0.865561	0.279279	0.500955	-0.653657	0.634679	-1.0299
NA	X6_128368	OCPTN_ST	OCPTN_STTRUE	1	0.303062	46	0.635305	0.847826	1	0.954991	0.927276	1.02989
NA	X6_195565	OCPTN_ST	OCPTN_STTRUE	1	0.303062	46	0.635305	0.847826	1	0.954991	0.927276	1.02989
Tongue dorsum	X6_199978	DCMCODE_13	DCMCODE_13TRUE	1	0.303085	33	1	0.575758	0.641541	1.23374	1.19799	1.02984
Retroauricular crease	X6_104327	DSUBFED	DSUBFED	1	0.303365	23	0.455195	0.0869565	1.55818	1.27929	1.24294	1.02924
Retroauricular crease	X6_150369	DSUBFED	DSUBFED	1	0.303365	23	0.455195	0.0869565	1.55818	1.27929	1.24294	1.02924
Retroauricular crease	X6_68746	DSUBFED	DSUBFED	1	0.303365	23	0.455195	0.0869565	1.55818	1.27929	1.24294	1.02924
Retroauricular crease	X6_105925	DSUBFED	DSUBFED	1	0.303365	23	0.455195	0.0869565	1.55818	1.27929	1.24294	1.02924
Supragingival plaque	X6_119756	DSUBFED	DSUBFED	1	0.303424	117	0.706161	0.188034	1.28041	0.459869	0.446857	1.02912
Buccal mucosa	X6_156982	DSUBFED	DSUBFED	1	0.303449	113	0.981105	0.60177	1.30913	-0.339244	0.329662	-1.02907
Supragingival plaque	X6_56043	DSUBFED	DSUBFED	1	0.303468	117	0.668239	0.82906	1.28041	-0.482647	0.469034	-1.02902
Tongue dorsum	X6_199978	BMI_CAT	BMI_CATobese	1	0.303549	128	1	0.507812	1.37968	-0.651334	0.633068	-1.02885
Buccal mucosa	X6_36135	BMI_CAT	BMI_CATobese	1	0.303719	116	0.562766	0.12931	1.3928	-1.16158	1.12941	-1.02849
Supragingival plaque	X6_49496	BMI_CAT	BMI_CAToverweight	1	0.303793	120	0.71363	0.191667	1.41039	-0.554717	0.539433	-1.02833
NA	X6_137666	BMI_CAT	BMI_CAToverweight	1	0.304272	111	0.500955	0.891892	1.43492	-0.730414	0.710992	-1.02732
Buccal mucosa	X6_84465	BMI_CAT	BMI_CAToverweight	1	0.304364	116	0.992704	0.577586	1.3928	0.416352	0.405359	1.02712
Tongue dorsum	X6_129689	EDLVL_BS	EDLVL_BSTRUE	1	0.304577	19	0.8916	0.263158	0.996792	1.34607	1.31111	1.02667
NA	X6_202994	BMI_CAT	BMI_CATobese	1	0.304733	111	0.810899	0.756757	1.43492	-0.65377	0.636994	-1.02634
NA	X6_203385	BMI_CAT	BMI_CAToverweight	1	0.304995	111	0.795655	0.765766	1.43492	0.531339	0.517984	1.02578
NA	X6_183641	BMI_CAT	BMI_CATobese	1	0.305018	111	0.825497	0.252252	1.43492	-0.844373	0.823191	-1.02573
Supragingival plaque	X6_63870	BMI_CAT	BMI_CAToverweight	1	0.305213	120	0.993447	0.425	1.41039	-0.44227	0.431349	-1.02532
NA	X6_60151	DSUBFED	DSUBFED	1	0.305483	108	0.419717	0.0833333	1.18299	0.660882	0.644922	1.02475
NA	X6_42014	DSUBFED	DSUBFED	1	0.305483	108	0.419717	0.916667	1.18299	-0.660882	0.644922	-1.02475
NA	X6_170154	DSUBFED	DSUBFED	1	0.305512	108	0.537858	0.87963	1.18299	0.622084	0.607098	1.02469
Buccal mucosa	X6_154791	BMI_CAT	BMI_CAToverweight	1	0.305785	116	0.486136	0.103448	1.3928	-0.730554	0.713357	-1.02411
NA	X6_139150	BMI_CAT	BMI_CATobese	1	0.306165	111	0.795655	0.234234	1.43492	0.651374	0.636542	1.0233
Buccal mucosa	X6_202842	MURICA	MURICATRUE	1	0.306434	116	1	0.5	0.53827	0.610025	0.596466	1.02273
Tongue dorsum	X6_36193	BMI_CAT	BMI_CATobese	1	0.306651	128	0.807761	0.242188	1.37968	-0.838689	0.820415	-1.02227
Supragingival plaque	X6_184628	DSUDIET	DSUDIET	1	0.306674	117	0.803802	0.239316	0.258144	0.491656	0.480966	1.02223
NA	X6_42437	BMI_CAT	BMI_CATobese	1	0.306804	111	0.727858	0.801802	1.43492	-0.667688	0.653346	-1.02195
NA	X6_115024	DCMCODE_13	DCMCODE_13TRUE	1	0.306888	46	0.77935	0.217391	0.688113	0.885816	0.86694	1.02177
Supragingival plaque	X6_97267	BMI_CAT	BMI_CAToverweight	1	0.307044	120	1	0.5	1.41039	-0.408936	0.40035	-1.02145
NA	X6_185741	MURICA	MURICATRUE	1	0.307256	111	0.442807	0.0900901	0.500955	-0.884519	0.866329	-1.021
Buccal mucosa	X6_128749	OCPTN_ST	OCPTN_STTRUE	1	0.307928	22	0.954434	0.681818	1	0.964597	0.946075	1.01958
Buccal mucosa	X6_90481	OCPTN_ST	OCPTN_STTRUE	1	0.307928	22	0.954434	0.681818	1	0.964597	0.946075	1.01958
Tongue dorsum	X6_109255	BMI_CAT	BMI_CAToverweight	1	0.30829	128	0.613006	0.148438	1.37968	0.544307	0.534254	1.01882
Supragingival plaque	X6_184627	BMI_CAT	BMI_CATobese	1	0.308833	120	0.71363	0.808333	1.41039	-0.797773	0.783919	-1.01767
Supragingival plaque	X6_44703	OCPTN_ST	OCPTN_STTRUE	1	0.309098	23	0.97934	0.347826	1	1.09861	1.08012	1.01712
Buccal mucosa	X6_105925	OCPTN_ST	OCPTN_STTRUE	1	0.309229	22	0.823617	0.227273	1	1.25276	1.23201	1.01684
Buccal mucosa	X6_108247	OCPTN_ST	OCPTN_STTRUE	1	0.309229	22	0.823617	0.227273	1	1.25276	1.23201	1.01684
Buccal mucosa	X6_149008	OCPTN_ST	OCPTN_STTRUE	1	0.309229	22	0.823617	0.227273	1	1.25276	1.23201	1.01684
Buccal mucosa	X6_202842	OCPTN_ST	OCPTN_STTRUE	1	0.309229	22	0.954434	0.681818	1	-1.25276	1.23201	-1.01684
Buccal mucosa	X6_62025	OCPTN_ST	OCPTN_STTRUE	1	0.309229	22	0.954434	0.681818	1	-1.25276	1.23201	-1.01684
Buccal mucosa	X6_145806	OCPTN_ST	OCPTN_STTRUE	1	0.309229	22	0.823617	0.772727	1	-1.25276	1.23201	-1.01684
NA	X6_115024	BMI_CAT	BMI_CATobese	1	0.309378	111	0.648049	0.162162	1.43492	0.70702	0.695524	1.01653
NA	X6_107271	DSUBFED	DSUBFED	1	0.309395	108	0.8222	0.75	1.18299	0.434769	0.427715	1.01649
Supragingival plaque	X6_202312	BMI_CAT	BMI_CAToverweight	1	0.309598	120	0.677298	0.175	1.41039	0.542966	0.534381	1.01607
Supragingival plaque	X6_67816	BMI_CAT	BMI_CATobese	1	0.309738	120	1	0.491667	1.41039	-0.61439	0.604851	-1.01577
NA	X6_55806	DCMCODE_13	DCMCODE_13TRUE	1	0.309813	46	1	0.521739	0.688113	-0.832852	0.820047	-1.01562
Tongue dorsum	X6_153897	DSUBFED	DSUBFED	1	0.309975	124	0.38017	0.927419	1.27848	0.602001	0.592944	1.01528
Nares	X6_39471	MURICA	MURICATRUE	1	0.310191	92	0.262466	0.0434783	0.504173	-1.33211	1.31265	-1.01482
NA	X6_80255	DCMCODE_13	DCMCODE_13TRUE	1	0.310348	46	0.937734	0.326087	0.688113	0.821343	0.80961	1.01449
Buccal mucosa	X6_199448	BMI_CAT	BMI_CAToverweight	1	0.310437	116	0.962422	0.37069	1.3928	-0.420071	0.414146	-1.01431
NA	X6_149327	DSUBFED	DSUBFED	1	0.31084	108	0.537858	0.87963	1.18299	0.564768	0.557267	1.01346
Supragingival plaque	X6_209274	DSUDIET	DSUDIET	1	0.310879	117	0.994505	0.57265	0.258144	0.578374	0.570738	1.01338
NA	X6_174007	OCPTN_ST	OCPTN_STTRUE	1	0.311155	46	0.885327	0.282609	1	-0.740707	0.731344	-1.0128
Tongue dorsum	X6_94538	DSUDIET	DSUDIET	1	0.311174	124	0.664101	0.169355	0.24689	0.490804	0.48462	1.01276
NA	X6_135314	MURICA	MURICATRUE	1	0.31147	111	0.889288	0.702703	0.500955	-0.815139	0.80536	-1.01214
NA	X6_95845	MURICA	MURICATRUE	1	0.311556	111	0.974651	0.612613	0.500955	0.643414	0.635808	1.01196
NA	X6_118674	DSUBFED	DSUBFED	1	0.311559	108	0.836711	0.740741	1.18299	0.45152	0.446185	1.01196
NA	X6_56347	MURICA	MURICATRUE	1	0.311733	111	0.727858	0.801802	0.500955	-1.08605	1.07361	-1.01159
NA	X6_77009	BMI_CAT	BMI_CAToverweight	1	0.312078	111	0.442807	0.0900901	1.43492	0.715075	0.707386	1.01087
NA	X6_131335	OCPTN_ST	OCPTN_STTRUE	1	0.312145	46	0.688113	0.173913	1	-0.911432	0.901754	-1.01073
NA	X6_130646	DCMCODE_13	DCMCODE_13TRUE	1	0.312246	46	0.577004	0.130435	0.688113	0.990953	0.980636	1.01052
NA	X6_140225	DCMCODE_13	DCMCODE_13TRUE	1	0.312246	46	0.577004	0.869565	0.688113	-0.990953	0.980636	-1.01052
NA	X6_104618	DCMCODE_13	DCMCODE_13TRUE	1	0.312246	46	0.577004	0.869565	0.688113	-0.990953	0.980636	-1.01052
NA	X6_111258	DCMCODE_13	DCMCODE_13TRUE	1	0.312246	46	0.577004	0.130435	0.688113	0.990953	0.980636	1.01052
NA	X6_100105	OCPTN_ST	OCPTN_STTRUE	1	0.312481	46	0.885327	0.717391	1	-0.802005	0.794041	-1.01003
Buccal mucosa	X6_90097	DSUBFED	DSUBFED	1	0.312503	113	0.701766	0.814159	1.30913	0.423312	0.419127	1.00998
Tongue dorsum	X6_209274	BMI_CAT	BMI_CATobese	1	0.312734	128	0.687267	0.179688	1.37968	-1.10005	1.08969	-1.0095
Buccal mucosa	X6_97267	BMI_CAT	BMI_CAToverweight	1	0.313013	116	0.847928	0.732759	1.3928	-0.446429	0.442483	-1.00892
Tongue dorsum	X6_32445	DSUBFED	DSUBFED	1	0.313152	124	0.464339	0.0967742	1.27848	0.544955	0.540292	1.00863
Tongue dorsum	X6_118674	EDLVL_BS	EDLVL_BSTRUE	1	0.313992	19	0.525087	0.105263	0.996792	-1.79176	1.77951	-1.00688
Tongue dorsum	X6_182765	EDLVL_BS	EDLVL_BSTRUE	1	0.313992	19	0.525087	0.105263	0.996792	-1.79176	1.77951	-1.00688
Tongue dorsum	X6_60151	EDLVL_BS	EDLVL_BSTRUE	1	0.313992	19	0.525087	0.105263	0.996792	-1.79176	1.77951	-1.00688
Tongue dorsum	X6_65847	EDLVL_BS	EDLVL_BSTRUE	1	0.313992	19	0.525087	0.105263	0.996792	-1.79176	1.77951	-1.00688
Tongue dorsum	X6_174007	DSUBFED	DSUBFED	1	0.314068	124	0.717283	0.193548	1.27848	0.431478	0.428597	1.00672
Buccal mucosa	X6_105225	DSUBFED	DSUBFED	1	0.314284	113	0.755728	0.212389	1.30913	-0.435862	0.433145	-1.00627
NA	X6_143839	BMI_CAT	BMI_CAToverweight	1	0.314777	111	0.709098	0.189189	1.43492	0.531094	0.528321	1.00525
NA	X6_104327	BMI_CAT	BMI_CATobese	1	0.314979	111	0.745871	0.792793	1.43492	0.820798	0.816853	1.00483
NA	X6_117241	DCMCODE_13	DCMCODE_13TRUE	1	0.315105	46	0.818534	0.23913	0.688113	0.843756	0.839919	1.00457
NA	X7_214048	DCMCODE_13	DCMCODE_13TRUE	1	0.315105	46	0.818534	0.76087	0.688113	-0.843756	0.839919	-1.00457
Tongue dorsum	X6_103418	EDLVL_BS	EDLVL_BSTRUE	1	0.315214	19	0.678954	0.157895	0.996792	-1.39639	1.39036	-1.00434
Tongue dorsum	X6_103923	EDLVL_BS	EDLVL_BSTRUE	1	0.315214	19	0.678954	0.157895	0.996792	-1.39639	1.39036	-1.00434
Tongue dorsum	X6_120450	EDLVL_BS	EDLVL_BSTRUE	1	0.315214	19	1	0.473684	0.996792	-1.39639	1.39036	-1.00434
Tongue dorsum	X7_123707	EDLVL_BS	EDLVL_BSTRUE	1	0.315214	19	1	0.473684	0.996792	-1.39639	1.39036	-1.00434
Tongue dorsum	X6_209274	EDLVL_BS	EDLVL_BSTRUE	1	0.315214	19	0.678954	0.157895	0.996792	-1.39639	1.39036	-1.00434
Tongue dorsum	X6_49036	EDLVL_BS	EDLVL_BSTRUE	1	0.315214	19	0.678954	0.157895	0.996792	-1.39639	1.39036	-1.00434
Tongue dorsum	X6_85774	EDLVL_BS	EDLVL_BSTRUE	1	0.315214	19	0.678954	0.157895	0.996792	-1.39639	1.39036	-1.00434
NA	X6_134746	OCPTN_ST	OCPTN_STTRUE	1	0.315457	46	0.818534	0.76087	1	-0.737909	0.735088	-1.00384
NA	X6_75391	OCPTN_ST	OCPTN_STTRUE	1	0.315457	46	0.818534	0.23913	1	0.737909	0.735088	1.00384
NA	X6_120400	DCMCODE_13	DCMCODE_13TRUE	1	0.315684	46	0.958712	0.652174	0.688113	-0.797695	0.795019	-1.00337
Tongue dorsum	X6_24671	DCMCODE_13	DCMCODE_13TRUE	1	0.315892	33	0.996317	0.393939	0.641541	0.999018	0.996094	1.00294
Tongue dorsum	X6_72946	DCMCODE_13	DCMCODE_13TRUE	1	0.315892	33	0.996317	0.606061	0.641541	-0.999018	0.996094	-1.00294
NA	X6_139761	BMI_CAT	BMI_CAToverweight	1	0.315895	111	0.689564	0.18018	1.43492	0.52919	0.527644	1.00293
Tongue dorsum	X6_64207	BMI_CAT	BMI_CAToverweight	1	0.316017	128	0.914776	0.679688	1.37968	-0.420059	0.418937	-1.00268
Tongue dorsum	X6_119084	OCPTN_ST	OCPTN_STTRUE	1	0.316422	32	0.965007	0.34375	0.999666	0.811242	0.809754	1.00184
Supragingival plaque	X6_49238	BMI_CAT	BMI_CAToverweight	1	0.316889	120	0.695803	0.183333	1.41039	-0.542254	0.541783	-1.00087
Buccal mucosa	X6_69184	MURICA	MURICATRUE	1	0.31724	116	0.834974	0.741379	0.53827	-0.798453	0.798336	-1.00015
Buccal mucosa	X6_61956	BMI_CAT	BMI_CATobese	1	0.317317	116	0.51275	0.887931	1.3928	-0.926598	0.926611	-0.999986
Tongue dorsum	X6_41475	DSUBFED	DSUBFED	1	0.31751	124	0.437496	0.0887097	1.27848	0.594871	0.595115	0.999589
NA	X6_183998	DSUBFED	DSUBFED	1	0.317889	108	0.589412	0.138889	1.18299	-0.52978	0.530413	-0.998805
NA	X6_123414	BMI_CAT	BMI_CAToverweight	1	0.317995	111	1	0.468468	1.43492	0.420593	0.421189	0.998586
Tongue dorsum	X6_85044	OCPTN_ST	OCPTN_STTRUE	1	0.318216	32	0.353944	0.9375	0.999666	-1.60944	1.61245	-0.998131
NA	X6_174427	OCPTN_ST	OCPTN_STTRUE	1	0.31873	46	0.818534	0.23913	1	-0.759184	0.761413	-0.997072
Supragingival plaque	X6_72946	MURICA	MURICATRUE	1	0.318797	120	0.389264	0.925	0.501139	0.868213	0.870883	0.996934
Tongue dorsum	X6_173979	BMI_CAT	BMI_CATobese	1	0.319113	128	0.97531	0.390625	1.37968	-0.663975	0.666453	-0.996282
Tongue dorsum	X6_91527	BMI_CAT	BMI_CATobese	1	0.319153	128	0.998945	0.554688	1.37968	0.629493	0.631893	0.996201
Supragingival plaque	X6_195894	DSUBFED	DSUBFED	1	0.319525	117	0.999993	0.452991	1.28041	-0.331654	0.333175	-0.995435
Buccal mucosa	X6_109255	BMI_CAT	BMI_CAToverweight	1	0.319673	116	0.366896	0.0689655	1.3928	-0.841551	0.845669	-0.99513
NA	X6_144436	DSUBFED	DSUBFED	1	0.319991	108	0.876369	0.287037	1.18299	0.399258	0.401475	0.994477
Buccal mucosa	X6_90481	BMI_CAT	BMI_CAToverweight	1	0.320128	116	0.955627	0.637931	1.3928	-0.414328	0.416748	-0.994194
Tongue dorsum	X6_90240	BMI_CAT	BMI_CAToverweight	1	0.320162	128	0.427837	0.914062	1.37968	-0.776529	0.781118	-0.994125
Buccal mucosa	X6_103923	DSUBFED	DSUBFED	1	0.32093	113	0.406404	0.079646	1.30913	-0.718396	0.723789	-0.992548
NA	X6_33238	BMI_CAT	BMI_CATobese	1	0.321257	111	0.625998	0.153153	1.43492	0.771145	0.777459	0.991879
Supragingival plaque	X6_180603	DSUDIET	DSUDIET	1	0.321445	117	0.535213	0.119658	0.258144	0.617787	0.623087	0.991493
NA	X6_85519	BMI_CAT	BMI_CATobese	1	0.321547	111	0.500955	0.891892	1.43492	-0.771271	0.778053	-0.991283
NA	X6_80255	DSUBFED	DSUBFED	1	0.322135	108	0.899705	0.305556	1.18299	-0.394475	0.398427	-0.99008
NA	X7_147498	DSUBFED	DSUBFED	1	0.322414	108	0.757272	0.212963	1.18299	0.441435	0.446115	0.989508
Supragingival plaque	X6_26906	DSUDIET	DSUDIET	1	0.322473	117	0.668239	0.82906	0.258144	-0.48076	0.485917	-0.989388
NA	X6_77477	BMI_CAT	BMI_CAToverweight	1	0.322482	111	0.900289	0.306306	1.43492	0.452285	0.457144	0.98937
Supragingival plaque	X6_184627	OCPTN_ST	OCPTN_STTRUE	1	0.322854	23	0.70964	0.826087	1	-1.31497	1.33012	-0.988611
Supragingival plaque	X6_25913	OCPTN_ST	OCPTN_STTRUE	1	0.322854	23	0.70964	0.826087	1	-1.31497	1.33012	-0.988611
Supragingival plaque	X6_49947	OCPTN_ST	OCPTN_STTRUE	1	0.322854	23	0.70964	0.826087	1	-1.31497	1.33012	-0.988611
Supragingival plaque	X6_57018	OCPTN_ST	OCPTN_STTRUE	1	0.323183	23	0.97934	0.652174	1	-1.21309	1.2279	-0.987939
NA	X6_92939	BMI_CAT	BMI_CATobese	1	0.323187	111	0.625998	0.153153	1.43492	0.684239	0.692599	0.98793
NA	X6_133809	OCPTN_ST	OCPTN_STTRUE	1	0.323247	46	0.97611	0.369565	1	-0.648125	0.656125	-0.987808
Supragingival plaque	X6_211583	DSUDIET	DSUDIET	1	0.323541	117	0.966325	0.376068	0.258144	0.522485	0.529256	0.987207
NA	X6_143839	DSUBFED	DSUBFED	1	0.323726	108	0.720396	0.194444	1.18299	-0.471763	0.478059	-0.98683
Tongue dorsum	X6_120450	BMI_CAT	BMI_CAToverweight	1	0.324119	128	1	0.46875	1.37968	0.378435	0.383798	0.986029
Supragingival plaque	X6_67816	DSUBFED	DSUBFED	1	0.324562	117	1	0.478632	1.28041	0.325366	0.330278	0.985127
Buccal mucosa	X6_159261	BMI_CAT	BMI_CAToverweight	1	0.324885	116	0.486136	0.103448	1.3928	-0.707297	0.718455	-0.984469
Buccal mucosa	X6_210706	DSUBFED	DSUBFED	1	0.324924	113	0.985925	0.40708	1.30913	-0.333539	0.338828	-0.98439
NA	X6_142856	OCPTN_ST	OCPTN_STTRUE	1	0.324939	46	0.958712	0.652174	1	0.66135	0.671859	0.98436
Supragingival plaque	X6_99002	BMI_CAT	BMI_CATobese	1	0.324945	120	1	0.5	1.41039	0.649552	0.659881	0.984347
Tongue dorsum	X6_66547	DSUBFED	DSUBFED	1	0.326025	124	0.625306	0.846774	1.27848	0.413409	0.420922	0.982152
Supragingival plaque	X6_127775	DSUBFED	DSUBFED	1	0.326183	117	0.706161	0.188034	1.28041	-0.430014	0.437972	-0.98183
Tongue dorsum	X6_17925	MURICA	MURICATRUE	1	0.326805	128	0.906029	0.3125	0.52739	0.666243	0.679444	0.98057
Retroauricular crease	X6_117494	OCPTN_ST	OCPTN_STTRUE	1	0.326959	13	0.863121	0.230769	1	-1.38629	1.41421	-0.980258
Retroauricular crease	X6_139150	OCPTN_ST	OCPTN_STTRUE	1	0.326959	13	0.863121	0.230769	1	-1.38629	1.41421	-0.980258
Retroauricular crease	X6_148764	OCPTN_ST	OCPTN_STTRUE	1	0.326959	13	0.970951	0.307692	1	-1.38629	1.41421	-0.980258
Retroauricular crease	X6_158772	OCPTN_ST	OCPTN_STTRUE	1	0.326959	13	0.863121	0.230769	1	-1.38629	1.41421	-0.980258
Retroauricular crease	X6_165971	OCPTN_ST	OCPTN_STTRUE	1	0.326959	13	0.863121	0.230769	1	-1.38629	1.41421	-0.980258
Retroauricular crease	X6_173132	OCPTN_ST	OCPTN_STTRUE	1	0.326959	13	0.863121	0.230769	1	-1.38629	1.41421	-0.980258
Retroauricular crease	X6_30143	OCPTN_ST	OCPTN_STTRUE	1	0.326959	13	0.970951	0.307692	1	-1.38629	1.41421	-0.980258
Retroauricular crease	X6_44338	OCPTN_ST	OCPTN_STTRUE	1	0.326959	13	0.863121	0.230769	1	-1.38629	1.41421	-0.980258
Retroauricular crease	X6_96390	OCPTN_ST	OCPTN_STTRUE	1	0.326959	13	0.863121	0.230769	1	-1.38629	1.41421	-0.980258
Buccal mucosa	X6_61652	OCPTN_ST	OCPTN_STTRUE	1	0.327063	22	0.614291	0.136364	1	-1.29928	1.32574	-0.980047
Buccal mucosa	X6_128085	OCPTN_ST	OCPTN_STTRUE	1	0.327063	22	0.614291	0.136364	1	-1.29928	1.32574	-0.980047
NA	X6_134746	BMI_CAT	BMI_CATobese	1	0.327455	111	0.745871	0.792793	1.43492	1.06934	1.092	0.979253
Tongue dorsum	X6_85774	MURICA	MURICATRUE	1	0.32767	128	0.651438	0.164062	0.52739	1.04542	1.06804	0.978817
Tongue dorsum	X6_188170	MURICA	MURICATRUE	1	0.327806	128	0.704263	0.1875	0.52739	1.06205	1.08534	0.978543
NA	X6_77477	OCPTN_ST	OCPTN_STTRUE	1	0.327981	46	0.913278	0.304348	1	-0.681585	0.696783	-0.978189
NA	X6_90240	MURICA	MURICATRUE	1	0.328643	111	0.968538	0.621622	0.500955	0.604936	0.619271	0.976852
Supragingival plaque	X6_144816	DSUBFED	DSUBFED	1	0.329022	117	0.706161	0.188034	1.28041	-0.402068	0.411919	-0.976085
NA	X6_114478	MURICA	MURICATRUE	1	0.330069	111	0.625998	0.153153	0.500955	-0.709389	0.728344	-0.973975
Tongue dorsum	X6_179701	DSUBFED	DSUBFED	1	0.331239	124	0.983022	0.403226	1.27848	-0.312272	0.321392	-0.971621
NA	X6_123414	MURICA	MURICATRUE	1	0.331489	111	1	0.468468	0.500955	0.626945	0.645591	0.971118
Retroauricular crease	X6_99853	DSUBFED	DSUBFED	1	0.331822	23	0.802859	0.217391	1.55818	-1.1548	1.18996	-0.97045
NA	X6_72839	OCPTN_ST	OCPTN_STTRUE	1	0.332013	46	0.937734	0.673913	1	0.656852	0.67712	0.970068
Tongue dorsum	X6_36193	MURICA	MURICATRUE	1	0.332346	128	0.807761	0.242188	0.52739	-0.581095	0.599438	-0.9694
Supragingival plaque	X6_41475	DSUDIET	DSUDIET	1	0.332758	117	0.455622	0.0940171	0.258144	0.582989	0.601905	0.968574
NA	X6_95094	MURICA	MURICATRUE	1	0.333475	111	0.442807	0.90991	0.500955	0.832447	0.860733	0.967137
Supragingival plaque	X6_138416	BMI_CAT	BMI_CAToverweight	1	0.333745	120	0.447653	0.0916667	1.41039	0.684763	0.708425	0.966598
Buccal mucosa	X6_62025	BMI_CAT	BMI_CATobese	1	0.334012	116	1	0.543103	1.3928	-0.636516	0.658876	-0.966063
Tongue dorsum	X6_184360	DSUDIET	DSUDIET	1	0.334032	124	0.879217	0.290323	0.24689	0.473312	0.489959	0.966024
NA	X6_202734	BMI_CAT	BMI_CAToverweight	1	0.334129	111	0.961888	0.630631	1.43492	0.426917	0.44202	0.965831
Nares	X6_149327	BMI_CAT	BMI_CATobese	1	0.334387	92	0.153772	0.0217391	1.44118	1.42591	1.47715	0.965315
Nares	X6_141640	BMI_CAT	BMI_CAToverweight	1	0.334652	92	0.504173	0.108696	1.44118	-0.832451	0.862835	-0.964786
Buccal mucosa	X6_139150	BMI_CAT	BMI_CAToverweight	1	0.335021	116	0.992704	0.422414	1.3928	-0.389915	0.404456	-0.96405
Tongue dorsum	X6_177609	DCMCODE_13	DCMCODE_13TRUE	1	0.335433	33	0.996317	0.393939	0.641541	0.987305	1.025	0.963228
Nares	X6_36135	BMI_CAT	BMI_CAToverweight	1	0.335445	92	0.469748	0.0978261	1.44118	-0.829056	0.860727	-0.963205
Posterior fornix	X6_56657	BMI_CAT	BMI_CATobese	1	0.335708	59	0.367108	0.0677966	1.46579	1.46859	1.52552	0.962679
Buccal mucosa	X6_213963	DSUBFED	DSUBFED	1	0.335872	113	0.596214	0.141593	1.30913	-0.472681	0.491172	-0.962353
NA	X6_174007	BMI_CAT	BMI_CAToverweight	1	0.337034	111	0.910727	0.315315	1.43492	0.429562	0.447441	0.960042
Supragingival plaque	X6_210706	BMI_CAT	BMI_CATobese	1	0.337298	120	0.76326	0.783333	1.41039	-0.67062	0.698914	-0.959517
Retroauricular crease	X6_61652	BMI_CAT	BMI_CATobese	1	0.337801	26	0.414864	0.0769231	1.35031	1.63901	1.70994	0.958519
Retroauricular crease	X6_33024	BMI_CAT	BMI_CATobese	1	0.337801	26	0.414864	0.0769231	1.35031	1.63901	1.70994	0.958519
Supragingival plaque	X6_85044	BMI_CAT	BMI_CAToverweight	1	0.337926	120	0.71363	0.191667	1.41039	-0.524081	0.546902	-0.958271
Supragingival plaque	X6_103412	DSUDIET	DSUDIET	1	0.338035	117	0.999993	0.452991	0.258144	0.457695	0.477734	0.958054
Supragingival plaque	X6_69531	DSUDIET	DSUDIET	1	0.338035	117	0.999993	0.452991	0.258144	0.457695	0.477734	0.958054
Supragingival plaque	X6_97267	MURICA	MURICATRUE	1	0.338281	120	1	0.5	0.501139	-0.581515	0.607283	-0.957568
Tongue dorsum	X6_103923	DSUDIET	DSUDIET	1	0.338476	124	0.490094	0.104839	0.24689	0.577521	0.603355	0.957182
Supragingival plaque	X6_103923	BMI_CAT	BMI_CAToverweight	1	0.33874	120	0.617448	0.15	1.41039	0.535311	0.559563	0.956658
Tongue dorsum	X6_91527	DSUDIET	DSUDIET	1	0.339049	124	0.998739	0.556452	0.24689	-0.454288	0.475173	-0.956046
Supragingival plaque	X6_212883	BMI_CAT	BMI_CATobese	1	0.339584	120	0.965286	0.625	1.41039	0.689856	0.722372	0.954988
Supragingival plaque	X6_61889	DSUBFED	DSUBFED	1	0.340257	117	1	0.538462	1.28041	-0.315984	0.331339	-0.953657
Supragingival plaque	X6_205407	OCPTN_ST	OCPTN_STTRUE	1	0.340392	23	0.802859	0.782609	1	1.01957	1.06942	0.953391
Buccal mucosa	X6_64207	BMI_CAT	BMI_CATobese	1	0.340481	116	1	0.534483	1.3928	-0.618098	0.648435	-0.953216
Nares	X6_127818	BMI_CAT	BMI_CAToverweight	1	0.340847	92	0.309787	0.0543478	1.44118	-1.09208	1.14655	-0.952493
Nares	X6_110798	DCMCODE_13	DCMCODE_13TRUE	1	0.341388	19	1	0.473684	0.8916	-1.09861	1.1547	-0.951426
NA	X7_214048	BMI_CAT	BMI_CATobese	1	0.342099	111	0.974651	0.612613	1.43492	-0.553936	0.583075	-0.950026
Supragingival plaque	X6_29169	BMI_CAT	BMI_CAToverweight	1	0.342137	120	0.937246	0.341667	1.41039	-0.427819	0.450359	-0.949951
Tongue dorsum	X6_184628	OCPTN_ST	OCPTN_STTRUE	1	0.342233	32	0.847418	0.25	0.999666	-0.914282	0.962643	-0.949762
Tongue dorsum	X6_173387	BMI_CAT	BMI_CATobese	1	0.342385	128	0.820505	0.75	1.37968	-0.660873	0.696049	-0.949463
NA	X6_113649	DCMCODE_13	DCMCODE_13TRUE	1	0.34294	46	0.853794	0.73913	0.688113	-0.812038	0.856244	-0.948373
NA	X6_17925	DSUBFED	DSUBFED	1	0.34297	108	0.962957	0.62963	1.18299	0.361249	0.380938	0.948313
Posterior fornix	X6_160917	MURICA	MURICATRUE	1	0.343027	59	0.973577	0.372881	0.429645	-0.935575	0.986684	-0.948201
Buccal mucosa	X6_49947	MURICA	MURICATRUE	1	0.34308	116	0.968729	0.62069	0.53827	0.546248	0.576151	0.948098
Posterior fornix	X6_90240	MURICA	MURICATRUE	1	0.343178	59	0.367108	0.0677966	0.429645	-1.29928	1.37069	-0.947905
NA	X6_66530	DCMCODE_13	DCMCODE_13TRUE	1	0.343178	46	0.359673	0.934783	0.688113	-1.29928	1.37069	-0.947905
Tongue dorsum	X6_119084	DSUBFED	DSUBFED	1	0.343794	124	0.889479	0.298387	1.27848	-0.343012	0.362326	-0.946696
Buccal mucosa	X6_99853	BMI_CAT	BMI_CAToverweight	1	0.344053	116	0.761417	0.784483	1.3928	-0.465913	0.492411	-0.946188
Buccal mucosa	X6_107496	BMI_CAT	BMI_CATobese	1	0.344552	116	0.651573	0.836207	1.3928	-0.73448	0.777056	-0.945209
NA	X6_105476	DCMCODE_13	DCMCODE_13TRUE	1	0.344587	46	1	0.456522	0.688113	0.766408	0.810893	0.94514
Supragingival plaque	X6_154791	DSUBFED	DSUBFED	1	0.345424	117	0.987201	0.589744	1.28041	0.32504	0.344503	0.943503
NA	X6_42437	MURICA	MURICATRUE	1	0.345983	111	0.727858	0.801802	0.500955	-1.02118	1.08359	-0.94241
NA	X6_120400	BMI_CAT	BMI_CAToverweight	1	0.34605	111	0.996554	0.567568	1.43492	0.402812	0.427487	0.942279
NA	X6_77477	DSUBFED	DSUBFED	1	0.346176	108	0.899705	0.305556	1.18299	-0.400044	0.424661	-0.942032
NA	X6_42437	BMI_CAT	BMI_CAToverweight	1	0.346263	111	0.727858	0.801802	1.43492	0.553753	0.587934	0.941863
NA	X6_188170	DSUBFED	DSUBFED	1	0.346548	108	0.955631	0.638889	1.18299	0.360183	0.382641	0.941307
Tongue dorsum	X6_108247	MURICA	MURICATRUE	1	0.348206	128	0.592746	0.140625	0.52739	1.00775	1.07428	0.938075
NA	X6_194092	BMI_CAT	BMI_CAToverweight	1	0.348845	111	0.996554	0.567568	1.43492	0.400298	0.427289	0.936832
Tongue dorsum	X6_123660	DSUBFED	DSUBFED	1	0.349167	124	0.983022	0.403226	1.27848	-0.312793	0.334107	-0.936205
NA	X6_121134	BMI_CAT	BMI_CAToverweight	1	0.349181	111	0.993454	0.576577	1.43492	0.400407	0.427703	0.93618
Tongue dorsum	X6_54148	MURICA	MURICATRUE	1	0.349626	128	0.964647	0.375	0.52739	-0.526264	0.562659	-0.935316
Supragingival plaque	X6_90845	DSUBFED	DSUBFED	1	0.349773	117	1	0.478632	1.28041	0.310591	0.332173	0.935029
Tongue dorsum	X6_104115	BMI_CAT	BMI_CAToverweight	1	0.349807	128	0.914776	0.679688	1.37968	0.381154	0.407667	0.934965
Tongue dorsum	X6_109231	DCMCODE_13	DCMCODE_13TRUE	1	0.349869	33	0.460128	0.909091	0.641541	-1.28311	1.37255	-0.934843
Tongue dorsum	X6_27154	DSUDIET	DSUDIET	1	0.350066	124	0.999868	0.451613	0.24689	-0.534132	0.571594	-0.934462
Buccal mucosa	X6_49947	OCPTN_ST	OCPTN_STTRUE	1	0.350247	22	0.823617	0.772727	1	0.995666	1.0659	0.93411
Buccal mucosa	X6_99853	OCPTN_ST	OCPTN_STTRUE	1	0.350247	22	0.823617	0.772727	1	0.995666	1.0659	0.93411
Tongue dorsum	X6_120450	BMI_CAT	BMI_CATobese	1	0.350742	128	1	0.46875	1.37968	0.576061	0.61733	0.93315
Supragingival plaque	X6_56043	OCPTN_ST	OCPTN_STTRUE	1	0.350849	23	0.937186	0.695652	1	-0.92479	0.991259	-0.932945
Buccal mucosa	X6_127775	DSUBFED	DSUBFED	1	0.351081	113	0.547679	0.123894	1.30913	-0.475906	0.510358	-0.932495
Tongue dorsum	X6_66152	BMI_CAT	BMI_CATobese	1	0.351153	128	0.98436	0.59375	1.37968	-0.605895	0.649854	-0.932356
Supragingival plaque	X6_77027	DSUBFED	DSUBFED	1	0.352031	117	0.817925	0.247863	1.28041	-0.375826	0.403828	-0.930657
Buccal mucosa	X6_173387	DSUBFED	DSUBFED	1	0.352058	113	0.996792	0.566372	1.30913	-0.303187	0.325796	-0.930604
Buccal mucosa	X6_113993	DSUBFED	DSUBFED	1	0.352503	113	0.596214	0.141593	1.30913	0.442612	0.476058	0.929745
Tongue dorsum	X6_173979	DCMCODE_13	DCMCODE_13TRUE	1	0.35321	33	0.996317	0.393939	0.641541	-1.09766	1.18233	-0.928381
Buccal mucosa	X6_62025	BMI_CAT	BMI_CAToverweight	1	0.353307	116	1	0.543103	1.3928	0.380741	0.410195	0.928195
NA	X6_134746	DCMCODE_13	DCMCODE_13TRUE	1	0.3535	46	0.818534	0.76087	0.688113	-0.776765	0.837192	-0.927822
Nares	X6_49238	MURICA	MURICATRUE	1	0.353779	92	0.677345	0.173913	0.504173	-0.865217	0.933066	-0.927284
Supragingival plaque	X6_91527	DSUBFED	DSUBFED	1	0.354322	117	1	0.487179	1.28041	0.308247	0.332795	0.926238
NA	X6_90929	DCMCODE_13	DCMCODE_13TRUE	1	0.354732	46	0.77935	0.217391	0.688113	-1.10195	1.19072	-0.925451
NA	X6_161782	BMI_CAT	BMI_CAToverweight	1	0.354976	111	0.669225	0.171171	1.43492	0.510221	0.551602	0.92498
NA	X6_142856	BMI_CAT	BMI_CAToverweight	1	0.355356	111	1	0.522523	1.43492	0.389172	0.421067	0.924251
Nares	X6_81136	BMI_CAT	BMI_CAToverweight	1	0.355488	92	0.309787	0.0543478	1.44118	1.18562	1.28315	0.923997
Supragingival plaque	X6_174007	MURICA	MURICATRUE	1	0.355516	120	0.807497	0.241667	0.501139	-0.635998	0.688352	-0.923943
Tongue dorsum	X6_25433	MURICA	MURICATRUE	1	0.355964	128	0.751812	0.789062	0.52739	-0.739694	0.80133	-0.923082
NA	X6_92939	OCPTN_ST	OCPTN_STTRUE	1	0.356098	46	0.440556	0.0869565	1	-1.13127	1.22588	-0.922826
NA	X6_150972	OCPTN_ST	OCPTN_STTRUE	1	0.356098	46	0.440556	0.913043	1	1.13127	1.22588	0.922826
NA	X6_113993	DSUBFED	DSUBFED	1	0.356934	108	0.481546	0.101852	1.18299	0.554912	0.602363	0.921224
Tongue dorsum	X6_69531	BMI_CAT	BMI_CAToverweight	1	0.356964	128	0.914776	0.320312	1.37968	-0.393984	0.427702	-0.921165
NA	X6_17925	MURICA	MURICATRUE	1	0.357342	111	0.961888	0.630631	0.500955	-0.644212	0.699894	-0.920442
NA	X6_158611	DSUBFED	DSUBFED	1	0.358269	108	0.863782	0.722222	1.18299	-0.380605	0.414301	-0.918668
NA	X7_213859	MURICA	MURICATRUE	1	0.358886	111	0.974651	0.612613	0.500955	0.568815	0.619969	0.91749
Supragingival plaque	X6_185741	MURICA	MURICATRUE	1	0.358899	120	0.76326	0.216667	0.501139	-0.599455	0.653381	-0.917466
NA	X6_90240	DSUBFED	DSUBFED	1	0.359547	108	0.962957	0.62963	1.18299	0.355937	0.388481	0.916228
Tongue dorsum	X6_56657	DSUBFED	DSUBFED	1	0.360033	124	0.8208	0.25	1.27848	0.323566	0.353507	0.915302
Buccal mucosa	X6_92037	BMI_CAT	BMI_CATobese	1	0.360265	116	0.932319	0.663793	1.3928	0.662675	0.724346	0.91486
NA	X6_105476	BMI_CAT	BMI_CAToverweight	1	0.360364	111	1	0.486486	1.43492	0.389472	0.425805	0.914672
NA	X6_183699	MURICA	MURICATRUE	1	0.360656	111	0.669225	0.171171	0.500955	0.992661	1.08592	0.914116
NA	X6_56043	DCMCODE_13	DCMCODE_13TRUE	1	0.36084	46	0.635305	0.847826	0.688113	-0.882406	0.965681	-0.913765
NA	X6_116015	DCMCODE_13	DCMCODE_13TRUE	1	0.36084	46	0.635305	0.152174	0.688113	0.882406	0.965681	0.913765
NA	X6_195565	DCMCODE_13	DCMCODE_13TRUE	1	0.36084	46	0.635305	0.847826	0.688113	-0.882406	0.965681	-0.913765
Supragingival plaque	X6_56043	MURICA	MURICATRUE	1	0.360841	120	0.658089	0.833333	0.501139	0.679328	0.743439	0.913764
NA	X6_149008	BMI_CAT	BMI_CAToverweight	1	0.361105	111	1	0.459459	1.43492	-0.407791	0.446522	-0.913261
Buccal mucosa	X6_184627	BMI_CAT	BMI_CATobese	1	0.361175	116	1	0.465517	1.3928	-0.616449	0.675095	-0.913129
Supragingival plaque	X6_103412	DSUBFED	DSUBFED	1	0.361182	117	0.999993	0.452991	1.28041	0.304144	0.333084	0.913116
NA	X6_174007	DCMCODE_13	DCMCODE_13TRUE	1	0.361632	46	0.885327	0.282609	0.688113	0.822657	0.90178	0.912259
NA	X6_118862	DCMCODE_13	DCMCODE_13TRUE	1	0.361632	46	0.885327	0.717391	0.688113	-0.822657	0.90178	-0.912259
Buccal mucosa	X6_139150	BMI_CAT	BMI_CATobese	1	0.362343	116	0.992704	0.422414	1.3928	-0.612463	0.672365	-0.91091
Supragingival plaque	X6_120450	BMI_CAT	BMI_CATobese	1	0.362488	120	0.993447	0.575	1.41039	0.635809	0.698204	0.910635
Nares	X6_39457	OCPTN_ST	OCPTN_STTRUE	1	0.362526	19	0.678954	0.157895	1	1.25276	1.37581	0.910563
NA	X6_85774	MURICA	MURICATRUE	1	0.363251	111	0.865561	0.720721	0.500955	-0.733392	0.806645	-0.909188
Buccal mucosa	X6_56668	DSUBFED	DSUBFED	1	0.363326	113	0.466752	0.0973451	1.30913	0.585234	0.64379	0.909045
Tongue dorsum	X6_56657	BMI_CAT	BMI_CATobese	1	0.363483	128	0.832772	0.257812	1.37968	0.627488	0.690496	0.908749
Tongue dorsum	X6_195894	DCMCODE_13	DCMCODE_13TRUE	1	0.363683	33	0.996317	0.393939	0.641541	-1.07992	1.18886	-0.90837
Tongue dorsum	X6_91953	DCMCODE_13	DCMCODE_13TRUE	1	0.363683	33	0.996317	0.393939	0.641541	-1.07992	1.18886	-0.90837
Posterior fornix	X6_170154	DSUBFED	DSUBFED	1	0.364281	59	0.219402	0.0338983	1.06219	-1.19901	1.3216	-0.907238
Buccal mucosa	X6_117494	BMI_CAT	BMI_CAToverweight	1	0.364316	116	1	0.543103	1.3928	-0.368958	0.406712	-0.907172
Tongue dorsum	X6_37895	BMI_CAT	BMI_CAToverweight	1	0.36532	128	0.794532	0.234375	1.37968	-0.446665	0.493403	-0.905274
Buccal mucosa	X6_190669	OCPTN_ST	OCPTN_STTRUE	1	0.365368	22	1	0.454545	1	0.847298	0.93605	0.905184
Buccal mucosa	X6_177585	BMI_CAT	BMI_CAToverweight	1	0.365395	116	0.709685	0.189655	1.3928	-0.469656	0.518881	-0.905134
NA	X6_131335	DSUBFED	DSUBFED	1	0.365607	108	0.757272	0.212963	1.18299	0.407491	0.450399	0.904733
Nares	X6_25913	BMI_CAT	BMI_CAToverweight	1	0.366167	92	0.353708	0.0652174	1.44118	0.875018	0.968286	0.903677
Supragingival plaque	X6_135880	OCPTN_ST	OCPTN_STTRUE	1	0.36618	23	0.937186	0.304348	1	-0.852062	0.94291	-0.903652
NA	X6_110310	MURICA	MURICATRUE	1	0.367245	111	0.999951	0.45045	0.500955	-0.562969	0.62438	-0.901645
Supragingival plaque	X6_195894	DSUDIET	DSUDIET	1	0.367294	117	0.999993	0.452991	0.258144	0.428775	0.475596	0.901553
Supragingival plaque	X6_179701	OCPTN_ST	OCPTN_STTRUE	1	0.367316	23	0.999762	0.608696	1	0.79921	0.886521	0.901513
NA	X7_66598	BMI_CAT	BMI_CAToverweight	1	0.367526	111	0.810899	0.756757	1.43492	0.45042	0.499846	0.901118
Buccal mucosa	X6_197923	DSUBFED	DSUBFED	1	0.367595	113	0.494909	0.106195	1.30913	0.533886	0.592557	0.900987
Nares	X6_99853	BMI_CAT	BMI_CAToverweight	1	0.367837	92	0.309787	0.0543478	1.44118	0.870081	0.966184	0.900533
Tongue dorsum	X6_177609	OCPTN_ST	OCPTN_STTRUE	1	0.368252	32	0.999666	0.40625	0.999666	0.708539	0.787482	0.899753
NA	X6_105225	DSUBFED	DSUBFED	1	0.368909	108	0.564191	0.12963	1.18299	0.489554	0.544846	0.898519
Tongue dorsum	X6_146554	MURICA	MURICATRUE	1	0.369062	128	0.945676	0.648438	0.52739	0.502061	0.558944	0.898232
Buccal mucosa	X6_26486	BMI_CAT	BMI_CAToverweight	1	0.36945	116	0.777348	0.224138	1.3928	-0.428335	0.477252	-0.897504
Tongue dorsum	X6_64207	DSUDIET	DSUDIET	1	0.369694	124	0.926029	0.669355	0.24689	-0.431929	0.481502	-0.897046
Nares	X6_127818	DSUBFED	DSUBFED	1	0.369975	88	0.271564	0.0454545	1.36952	0.876527	0.977698	0.896521
Nares	X6_139150	DSUBFED	DSUBFED	1	0.369975	88	0.271564	0.0454545	1.36952	0.876527	0.977698	0.896521
Nares	X6_58645	DSUBFED	DSUBFED	1	0.369975	88	0.271564	0.0454545	1.36952	0.876527	0.977698	0.896521
Nares	X6_56043	BMI_CAT	BMI_CAToverweight	1	0.37014	92	0.309787	0.0543478	1.44118	1.12933	1.26011	0.896212
Tongue dorsum	X6_118674	BMI_CAT	BMI_CAToverweight	1	0.370281	128	0.50394	0.109375	1.37968	0.571971	0.638398	0.895947
Tongue dorsum	X6_213360	BMI_CAT	BMI_CAToverweight	1	0.370298	128	0.704263	0.1875	1.37968	-0.45772	0.510896	-0.895916
Buccal mucosa	X6_17925	BMI_CAT	BMI_CAToverweight	1	0.370348	116	0.962422	0.37069	1.3928	-0.377456	0.421352	-0.895821
NA	X6_57750	MURICA	MURICATRUE	1	0.370452	111	1	0.540541	0.500955	-0.578453	0.645864	-0.895626
Supragingival plaque	X6_120450	DSUBFED	DSUBFED	1	0.370786	117	0.987201	0.589744	1.28041	0.31165	0.348212	0.895002
Buccal mucosa	X6_67816	BMI_CAT	BMI_CAToverweight	1	0.370873	116	0.562766	0.12931	1.3928	0.504789	0.564111	0.89484
Supragingival plaque	X6_177609	MURICA	MURICATRUE	1	0.37097	120	0.793324	0.766667	0.501139	-0.729933	0.81588	-0.894657
Tongue dorsum	X6_179701	DSUDIET	DSUDIET	1	0.37179	124	0.983022	0.403226	0.24689	-0.508895	0.569792	-0.893125
Buccal mucosa	X6_96390	DSUBFED	DSUBFED	1	0.371879	113	0.466752	0.902655	1.30913	0.49075	0.549577	0.892959
Buccal mucosa	X6_145806	MURICA	MURICATRUE	1	0.371912	116	0.974547	0.612069	0.53827	-0.562292	0.629738	-0.892898
Supragingival plaque	X6_46748	DSUBFED	DSUBFED	1	0.372128	117	0.757849	0.213675	1.28041	0.350399	0.392606	0.892495
Nares	X6_53818	DCMCODE_13	DCMCODE_13TRUE	1	0.372342	19	0.8916	0.263158	0.8916	-1.16315	1.30384	-0.892096
Supragingival plaque	X6_27154	MURICA	MURICATRUE	1	0.372447	120	1	0.525	0.501139	-0.550946	0.617722	-0.891899
NA	X6_33238	DSUBFED	DSUBFED	1	0.372504	108	0.636757	0.157407	1.18299	0.449582	0.504134	0.891792
Tongue dorsum	X6_184628	DCMCODE_13	DCMCODE_13TRUE	1	0.372761	33	0.833765	0.242424	0.641541	0.915847	1.02752	0.891314
Buccal mucosa	X6_212883	BMI_CAT	BMI_CAToverweight	1	0.373031	116	0.366896	0.0689655	1.3928	0.715645	0.803364	0.890811
Buccal mucosa	X6_182765	BMI_CAT	BMI_CAToverweight	1	0.373031	116	0.366896	0.0689655	1.3928	0.715645	0.803364	0.890811
Supragingival plaque	X6_138416	BMI_CAT	BMI_CATobese	1	0.373523	120	0.447653	0.0916667	1.41039	0.825181	0.927281	0.889893
Nares	X6_190669	BMI_CAT	BMI_CAToverweight	1	0.374678	92	0.210925	0.0326087	1.44118	1.11339	1.25417	0.887746
Nares	X6_208036	BMI_CAT	BMI_CAToverweight	1	0.374678	92	0.210925	0.0326087	1.44118	1.11339	1.25417	0.887746
Tongue dorsum	X6_94538	BMI_CAT	BMI_CAToverweight	1	0.374751	128	0.651438	0.164062	1.37968	0.455804	0.513519	0.887609
Nares	X6_39457	MURICA	MURICATRUE	1	0.375394	92	0.353708	0.0652174	0.504173	-1.12826	1.27284	-0.886415
Buccal mucosa	X6_128749	MURICA	MURICATRUE	1	0.375487	116	1	0.534483	0.53827	0.513773	0.57972	0.886243
NA	X6_111258	MURICA	MURICATRUE	1	0.375738	111	0.669225	0.171171	0.500955	0.958324	1.0819	0.885776
Supragingival plaque	X6_182765	MURICA	MURICATRUE	1	0.375899	120	0.971161	0.616667	0.501139	-0.584214	0.659773	-0.885478
Tongue dorsum	X6_90481	BMI_CAT	BMI_CATobese	1	0.376201	128	0.855917	0.726562	1.37968	-0.620099	0.700743	-0.884917
Buccal mucosa	X6_52811	MURICA	MURICATRUE	1	0.376417	116	0.429294	0.913793	0.53827	0.760809	0.86014	0.884517
NA	X6_189038	DCMCODE_13	DCMCODE_13TRUE	1	0.37648	46	1	0.478261	0.688113	0.710748	0.803649	0.884401
Buccal mucosa	X6_208903	BMI_CAT	BMI_CATobese	1	0.376627	116	0.988974	0.413793	1.3928	-0.640525	0.724471	-0.884129
Tongue dorsum	X6_128749	EDLVL_BS	EDLVL_BSTRUE	1	0.376693	19	1	0.578947	0.996792	-0.937376	1.06037	-0.884005
Tongue dorsum	X6_66152	EDLVL_BS	EDLVL_BSTRUE	1	0.376693	19	1	0.578947	0.996792	-0.937376	1.06037	-0.884005
Tongue dorsum	X6_104115	EDLVL_BS	EDLVL_BSTRUE	1	0.376775	19	0.8916	0.736842	0.996792	1.01288	1.14598	0.883855
Tongue dorsum	X6_213360	EDLVL_BS	EDLVL_BSTRUE	1	0.376775	19	0.8916	0.263158	0.996792	-1.01288	1.14598	-0.883855
NA	X6_70847	BMI_CAT	BMI_CATobese	1	0.377026	111	0.709098	0.189189	1.43492	-0.727291	0.823296	-0.883389
Tongue dorsum	X6_56668	DSUBFED	DSUBFED	1	0.377434	124	0.625306	0.846774	1.27848	0.390781	0.442744	0.882634
Tongue dorsum	X6_61652	MURICA	MURICATRUE	1	0.37748	128	0.736519	0.796875	0.52739	-0.709355	0.803758	-0.882548
Tongue dorsum	X6_26486	BMI_CAT	BMI_CATobese	1	0.377649	128	0.52739	0.882812	1.37968	-0.670555	0.760063	-0.882237
NA	X6_107346	MURICA	MURICATRUE	1	0.378043	111	0.648049	0.837838	0.500955	0.639649	0.72563	0.881508
Tongue dorsum	X6_36193	EDLVL_BS	EDLVL_BSTRUE	1	0.379056	19	0.958712	0.315789	0.996792	-0.95277	1.08314	-0.879638
NA	X6_85519	DSUBFED	DSUBFED	1	0.379124	108	0.510338	0.888889	1.18299	0.52954	0.602085	0.879511
NA	X6_140225	DSUBFED	DSUBFED	1	0.379124	108	0.510338	0.888889	1.18299	0.52954	0.602085	0.879511
Supragingival plaque	X6_209274	BMI_CAT	BMI_CATobese	1	0.37914	120	0.993447	0.575	1.41039	-0.525132	0.597092	-0.879482
NA	X6_189038	DSUBFED	DSUBFED	1	0.380619	108	1	0.462963	1.18299	-0.323441	0.368906	-0.876757
Supragingival plaque	X6_61889	BMI_CAT	BMI_CAToverweight	1	0.380705	120	0.999796	0.55	1.41039	-0.35716	0.407438	-0.876599
NA	X6_73558	MURICA	MURICATRUE	1	0.380825	111	0.961888	0.630631	0.500955	-0.612721	0.699153	-0.876377
Tongue dorsum	X6_32445	DSUDIET	DSUDIET	1	0.381135	124	0.464339	0.0967742	0.24689	0.519874	0.593595	0.875807
Supragingival plaque	X6_116723	BMI_CAT	BMI_CAToverweight	1	0.381347	120	0.76326	0.783333	1.41039	-0.411314	0.469849	-0.875417
Nares	X6_26486	BMI_CAT	BMI_CATobese	1	0.381624	92	0.210925	0.0326087	1.44118	1.28555	1.46935	0.874908
Nares	X6_66547	BMI_CAT	BMI_CATobese	1	0.381624	92	0.210925	0.0326087	1.44118	1.28555	1.46935	0.874908
Tongue dorsum	X6_91953	BMI_CAT	BMI_CATobese	1	0.381914	128	0.86681	0.28125	1.37968	-0.620644	0.709815	-0.874376
NA	X6_90887	BMI_CAT	BMI_CAToverweight	1	0.381986	111	0.52813	0.117117	1.43492	-0.740999	0.84759	-0.874242
Supragingival plaque	X6_113993	DSUBFED	DSUBFED	1	0.382123	117	0.999993	0.547009	1.28041	0.298292	0.341299	0.873991
Retroauricular crease	X6_107346	DSUBFED	DSUBFED	1	0.382557	23	0.802859	0.217391	1.55818	0.822759	0.942239	0.873196
Retroauricular crease	X6_56043	DSUBFED	DSUBFED	1	0.382557	23	0.802859	0.217391	1.55818	0.822759	0.942239	0.873196
Retroauricular crease	X6_66547	DSUBFED	DSUBFED	1	0.382557	23	0.802859	0.217391	1.55818	0.822759	0.942239	0.873196
Supragingival plaque	X6_154791	BMI_CAT	BMI_CAToverweight	1	0.382567	120	0.981532	0.6	1.41039	0.37414	0.428482	0.873176
Buccal mucosa	X6_177609	BMI_CAT	BMI_CATobese	1	0.38295	116	0.53827	0.12069	1.3928	0.676508	0.775391	0.872473
Buccal mucosa	X6_184360	BMI_CAT	BMI_CAToverweight	1	0.383377	116	0.608911	0.146552	1.3928	-0.51976	0.596266	-0.871691
Supragingival plaque	X6_37924	MURICA	MURICATRUE	1	0.383391	120	0.891811	0.7	0.501139	-0.626423	0.71865	-0.871665
Nares	X6_164274	DSUBFED	DSUBFED	1	0.383551	88	0.484419	0.102273	1.36952	-0.668027	0.766637	-0.871373
Supragingival plaque	X6_184628	BMI_CAT	BMI_CATobese	1	0.383751	120	0.793324	0.233333	1.41039	-0.718507	0.824917	-0.871005
Buccal mucosa	X6_153897	MURICA	MURICATRUE	1	0.383839	116	0.777348	0.775862	0.53827	0.579842	0.665838	0.870845
Nares	X6_71275	BMI_CAT	BMI_CAToverweight	1	0.383968	92	0.210925	0.0326087	1.44118	1.08565	1.247	0.870608
Nares	X6_92260	BMI_CAT	BMI_CAToverweight	1	0.383968	92	0.210925	0.0326087	1.44118	1.08565	1.247	0.870608
NA	X6_75619	BMI_CAT	BMI_CAToverweight	1	0.384305	111	0.554155	0.126126	1.43492	0.508937	0.584991	0.869991
NA	X6_58645	DSUBFED	DSUBFED	1	0.384356	108	0.564191	0.87037	1.18299	0.497328	0.571708	0.869898
NA	X6_75619	DSUBFED	DSUBFED	1	0.384356	108	0.564191	0.12963	1.18299	-0.497328	0.571708	-0.869898
Buccal mucosa	X6_196633	BMI_CAT	BMI_CATobese	1	0.384565	116	0.821452	0.75	1.3928	-0.608934	0.700313	-0.869517
Tongue dorsum	X6_17925	OCPTN_ST	OCPTN_STTRUE	1	0.384924	32	0.965007	0.34375	0.999666	-0.738757	0.85026	-0.86886
NA	X6_107346	OCPTN_ST	OCPTN_STTRUE	1	0.385078	46	0.635305	0.847826	1	-0.753469	0.867474	-0.868578
NA	X6_185741	OCPTN_ST	OCPTN_STTRUE	1	0.385078	46	0.635305	0.152174	1	0.753469	0.867474	0.868578
NA	X6_213360	OCPTN_ST	OCPTN_STTRUE	1	0.385078	46	0.635305	0.152174	1	0.753469	0.867474	0.868578
Tongue dorsum	X6_27154	BMI_CAT	BMI_CAToverweight	1	0.385292	128	0.99992	0.453125	1.37968	0.335733	0.386705	0.868187
Tongue dorsum	X6_85714	DSUDIET	DSUDIET	1	0.386181	124	0.987195	0.58871	0.24689	-0.407097	0.469783	-0.866565
Supragingival plaque	X6_92251	MURICA	MURICATRUE	1	0.386233	120	0.929095	0.333333	0.501139	0.599787	0.692219	0.866469
NA	X6_27580	OCPTN_ST	OCPTN_STTRUE	1	0.386288	46	1	0.434783	1	-0.546173	0.630416	-0.86637
NA	X6_150369	BMI_CAT	BMI_CATobese	1	0.386848	111	0.795655	0.765766	1.43492	-0.547052	0.632176	-0.865348
NA	X6_184628	DCMCODE_13	DCMCODE_13TRUE	1	0.387656	46	1	0.543478	0.688113	-0.731722	0.847022	-0.863877
NA	X6_49036	BMI_CAT	BMI_CAToverweight	1	0.388055	111	0.411615	0.918919	1.43492	0.72988	0.845601	0.86315
Tongue dorsum	X6_93460	OCPTN_ST	OCPTN_STTRUE	1	0.388098	32	0.894393	0.28125	0.999666	0.733052	0.849352	0.863072
Buccal mucosa	X6_144765	MURICA	MURICATRUE	1	0.388257	116	0.709685	0.189655	0.53827	-0.562436	0.651886	-0.862782
NA	X6_133942	OCPTN_ST	OCPTN_STTRUE	1	0.388347	46	0.77935	0.217391	1	0.651558	0.755326	0.862619
Supragingival plaque	X6_108247	DSUBFED	DSUBFED	1	0.388434	117	0.687563	0.179487	1.28041	0.361415	0.419051	0.862462
Retroauricular crease	X6_113953	BMI_CAT	BMI_CAToverweight	1	0.388533	26	0.546365	0.115385	1.35031	1.3178	1.52827	0.86228
NA	X6_71475	BMI_CAT	BMI_CATobese	1	0.388566	111	0.910727	0.684685	1.43492	-0.550431	0.638388	-0.86222
Tongue dorsum	X6_37924	BMI_CAT	BMI_CATobese	1	0.388913	128	0.952396	0.640625	1.37968	0.629643	0.730791	0.86159
Tongue dorsum	X6_63853	BMI_CAT	BMI_CATobese	1	0.389295	128	0.98004	0.601562	1.37968	-0.55106	0.640101	-0.860896
Posterior fornix	X6_47906	BMI_CAT	BMI_CATobese	1	0.389324	59	0.297758	0.0508475	1.46579	1.30484	1.51576	0.860845
Posterior fornix	X6_83290	BMI_CAT	BMI_CATobese	1	0.389324	59	0.297758	0.0508475	1.46579	1.30484	1.51576	0.860845
Posterior fornix	X6_84702	BMI_CAT	BMI_CATobese	1	0.389324	59	0.297758	0.0508475	1.46579	1.30484	1.51576	0.860845
Supragingival plaque	X6_90845	DSUDIET	DSUDIET	1	0.389675	117	1	0.478632	0.258144	0.411175	0.477995	0.860208
Nares	X6_153897	BMI_CAT	BMI_CAToverweight	1	0.389696	92	0.309787	0.0543478	1.44118	0.811021	0.942862	0.860169
Tongue dorsum	X6_159659	DSUDIET	DSUDIET	1	0.38973	124	0.733764	0.798387	0.24689	-0.411563	0.478503	-0.860107
Tongue dorsum	X6_177585	DCMCODE_13	DCMCODE_13TRUE	1	0.390209	33	0.460128	0.0909091	0.641541	1.15419	1.34327	0.859238
Nares	X6_61081	BMI_CAT	BMI_CAToverweight	1	0.390269	92	0.394769	0.076087	1.44118	0.80999	0.942803	0.85913
Tongue dorsum	X6_30161	DSUDIET	DSUDIET	1	0.390843	124	0.8208	0.75	0.24689	-0.407707	0.475134	-0.85809
Tongue dorsum	X6_62025	OCPTN_ST	OCPTN_STTRUE	1	0.390908	32	0.894393	0.71875	0.999666	0.821698	0.95772	0.857973
NA	X6_75391	DCMCODE_13	DCMCODE_13TRUE	1	0.390929	46	0.818534	0.23913	0.688113	-0.977647	1.13954	-0.857934
Nares	X6_161782	MURICA	MURICATRUE	1	0.39149	92	0.999944	0.445652	0.504173	-0.601117	0.701486	-0.856919
Tongue dorsum	X6_184360	BMI_CAT	BMI_CAToverweight	1	0.391868	128	0.877262	0.289062	1.37968	-0.372661	0.435233	-0.856234
NA	X6_131335	BMI_CAT	BMI_CAToverweight	1	0.391892	111	0.745871	0.207207	1.43492	0.427543	0.499354	0.856191
NA	X6_104327	OCPTN_ST	OCPTN_STTRUE	1	0.391937	46	0.577004	0.869565	1	0.820612	0.958536	0.85611
NA	X6_39471	OCPTN_ST	OCPTN_STTRUE	1	0.391937	46	0.577004	0.869565	1	0.820612	0.958536	0.85611
Retroauricular crease	X6_25913	BMI_CAT	BMI_CATobese	1	0.392196	26	0.885327	0.269231	1.35031	1.02607	1.19919	0.855641
Tongue dorsum	X6_128085	DSUBFED	DSUBFED	1	0.392453	124	0.899286	0.693548	1.27848	0.288638	0.337518	0.855178
Buccal mucosa	X6_37895	MURICA	MURICATRUE	1	0.392572	116	0.974547	0.387931	0.53827	-0.492394	0.575925	-0.854961
Buccal mucosa	X6_158772	MURICA	MURICATRUE	1	0.392572	116	0.974547	0.612069	0.53827	0.492394	0.575925	0.854961
NA	X6_183998	BMI_CAT	BMI_CAToverweight	1	0.392785	111	0.579102	0.135135	1.43492	0.496985	0.581556	0.854578
Supragingival plaque	X6_56043	BMI_CAT	BMI_CATobese	1	0.392852	120	0.658089	0.833333	1.41039	0.949996	1.11181	0.854456
NA	X6_147771	BMI_CAT	BMI_CAToverweight	1	0.393018	111	0.727858	0.198198	1.43492	0.426047	0.498792	0.854158
NA	X6_89989	OCPTN_ST	OCPTN_STTRUE	1	0.393021	46	0.998196	0.586957	1	0.543543	0.636354	0.854152
Supragingival plaque	X6_37895	DSUBFED	DSUBFED	1	0.393807	117	0.396409	0.923077	1.28041	-0.517028	0.606319	-0.852733
Tongue dorsum	X6_174007	DCMCODE_13	DCMCODE_13TRUE	1	0.394224	33	0.833765	0.242424	0.641541	0.875209	1.02726	0.851983
Tongue dorsum	X6_135880	MURICA	MURICATRUE	1	0.394248	128	0.613006	0.148438	0.52739	0.91249	1.07108	0.851938
Retroauricular crease	X6_115024	DSUBFED	DSUBFED	1	0.39478	23	0.70964	0.173913	1.55818	1.09861	1.29099	0.850981
Retroauricular crease	X6_65508	DSUBFED	DSUBFED	1	0.39478	23	0.70964	0.173913	1.55818	1.09861	1.29099	0.850981
Retroauricular crease	X6_84465	DSUBFED	DSUBFED	1	0.39478	23	0.70964	0.173913	1.55818	1.09861	1.29099	0.850981
NA	X6_117241	BMI_CAT	BMI_CAToverweight	1	0.395532	111	0.795655	0.234234	1.43492	-0.438045	0.515573	-0.849629
Nares	X6_125450	DSUBFED	DSUBFED	1	0.395647	88	0.32029	0.0568182	1.36952	0.686101	0.807728	0.849421
Tongue dorsum	X6_127775	OCPTN_ST	OCPTN_STTRUE	1	0.396319	32	0.470567	0.09375	0.999666	1.15922	1.36666	0.848214
Tongue dorsum	X6_36193	BMI_CAT	BMI_CAToverweight	1	0.396347	128	0.807761	0.242188	1.37968	-0.381035	0.449247	-0.848163
Supragingival plaque	X6_111258	BMI_CAT	BMI_CATobese	1	0.396353	120	0.858763	0.725	1.41039	0.695511	0.820029	0.848153
NA	X6_184628	BMI_CAT	BMI_CAToverweight	1	0.396635	111	1	0.504505	1.43492	0.357971	0.422311	0.847647
Buccal mucosa	X6_92939	DSUBFED	DSUBFED	1	0.396894	113	0.466752	0.902655	1.30913	-0.434139	0.51245	-0.847182
Buccal mucosa	X6_205407	BMI_CAT	BMI_CAToverweight	1	0.397262	116	0.777348	0.224138	1.3928	0.399572	0.472017	0.84652
Retroauricular crease	X6_53818	BMI_CAT	BMI_CAToverweight	1	0.397745	26	0.935842	0.307692	1.35031	0.980773	1.15978	0.845655
NA	X6_116067	BMI_CAT	BMI_CAToverweight	1	0.397798	111	0.795655	0.765766	1.43492	0.435347	0.514862	0.845561
Buccal mucosa	X6_128085	BMI_CAT	BMI_CATobese	1	0.397972	116	0.630657	0.155172	1.3928	-0.932696	1.10346	-0.845249
Supragingival plaque	X6_46748	BMI_CAT	BMI_CAToverweight	1	0.39872	120	0.747339	0.208333	1.41039	-0.433823	0.514063	-0.84391
NA	X6_113993	MURICA	MURICATRUE	1	0.398731	111	0.472547	0.0990991	0.500955	-0.720339	0.853593	-0.84389
Buccal mucosa	X6_90240	BMI_CAT	BMI_CAToverweight	1	0.398842	116	0.872178	0.715517	1.3928	-0.376117	0.445799	-0.843692
NA	X7_147498	BMI_CAT	BMI_CAToverweight	1	0.399059	111	0.745871	0.207207	1.43492	-0.434293	0.51499	-0.843304
Supragingival plaque	X6_153831	BMI_CAT	BMI_CATobese	1	0.399424	120	1	0.466667	1.41039	-0.512987	0.608778	-0.84265
NA	X6_122071	BMI_CAT	BMI_CAToverweight	1	0.399698	111	0.900289	0.306306	1.43492	-0.392966	0.466616	-0.842161
Supragingival plaque	X6_72839	MURICA	MURICATRUE	1	0.399762	120	0.965286	0.625	0.501139	-0.558218	0.662931	-0.842046
NA	X6_161782	OCPTN_ST	OCPTN_STTRUE	1	0.399785	46	0.688113	0.173913	1	0.718901	0.853796	0.842005
Supragingival plaque	X6_33024	DSUBFED	DSUBFED	1	0.399874	117	0.803802	0.239316	1.28041	-0.335456	0.398477	-0.841846
Posterior fornix	X6_56657	BMI_CAT	BMI_CAToverweight	1	0.400593	59	0.367108	0.0677966	1.46579	1.08207	1.28732	0.840563
NA	X6_135314	BMI_CAT	BMI_CAToverweight	1	0.400629	111	0.889288	0.702703	1.43492	0.387171	0.460644	0.840499
Tongue dorsum	X6_144765	EDLVL_BS	EDLVL_BSTRUE	1	0.402217	19	1	0.421053	0.996792	-0.851215	1.01617	-0.837669
Tongue dorsum	X6_195894	EDLVL_BS	EDLVL_BSTRUE	1	0.402217	19	1	0.421053	0.996792	-0.851215	1.01617	-0.837669
Tongue dorsum	X6_199978	EDLVL_BS	EDLVL_BSTRUE	1	0.402217	19	1	0.578947	0.996792	0.851215	1.01617	0.837669
NA	X6_174007	MURICA	MURICATRUE	1	0.402549	111	0.910727	0.315315	0.500955	-0.525951	0.628318	-0.837078
Tongue dorsum	X6_29169	DSUDIET	DSUDIET	1	0.403019	124	0.793949	0.766129	0.24689	-0.396558	0.474215	-0.836242
Tongue dorsum	X6_90481	MURICA	MURICATRUE	1	0.403196	128	0.855917	0.726562	0.52739	0.492856	0.589592	0.835927
Buccal mucosa	X6_173387	OCPTN_ST	OCPTN_STTRUE	1	0.403563	22	0.954434	0.681818	1	-0.836287	1.00121	-0.835276
Supragingival plaque	X6_199263	OCPTN_ST	OCPTN_STTRUE	1	0.403743	23	0.595609	0.130435	1	-1.10819	1.32724	-0.834954
Supragingival plaque	X6_30726	OCPTN_ST	OCPTN_STTRUE	1	0.403743	23	0.595609	0.130435	1	-1.10819	1.32724	-0.834954
Tongue dorsum	X6_111258	BMI_CAT	BMI_CATobese	1	0.404027	128	0.704263	0.8125	1.37968	-0.676019	0.810136	-0.83445
NA	X6_122071	DCMCODE_13	DCMCODE_13TRUE	1	0.404064	46	0.989588	0.391304	0.688113	-0.738587	0.885188	-0.834384
NA	X6_105916	DCMCODE_13	DCMCODE_13TRUE	1	0.404064	46	0.989588	0.608696	0.688113	0.738587	0.885188	0.834384
Supragingival plaque	X6_109255	MURICA	MURICATRUE	1	0.404299	120	0.901845	0.308333	0.501139	-0.521965	0.625881	-0.833968
NA	X6_76152	MURICA	MURICATRUE	1	0.404882	111	0.500955	0.891892	0.500955	0.725366	0.870857	0.832933
Tongue dorsum	X6_129689	DSUBFED	DSUBFED	1	0.405344	124	0.717283	0.193548	1.27848	-0.335915	0.403688	-0.832116
NA	X6_80255	BMI_CAT	BMI_CATobese	1	0.405421	111	0.889288	0.297297	1.43492	0.568058	0.68278	0.831978
Supragingival plaque	X6_154791	BMI_CAT	BMI_CATobese	1	0.405901	120	0.981532	0.6	1.41039	0.563571	0.67808	0.831128
NA	X6_128368	MURICA	MURICATRUE	1	0.405915	111	0.669225	0.828829	0.500955	0.604775	0.727678	0.831103
Supragingival plaque	X6_37924	OCPTN_ST	OCPTN_STTRUE	1	0.406098	23	0.878239	0.73913	1	-0.902456	1.08628	-0.83078
Supragingival plaque	X6_108247	OCPTN_ST	OCPTN_STTRUE	1	0.406098	23	0.878239	0.26087	1	0.902456	1.08628	0.83078
Supragingival plaque	X6_111258	BMI_CAT	BMI_CAToverweight	1	0.406261	120	0.858763	0.725	1.41039	-0.360226	0.433751	-0.830492
Tongue dorsum	X6_188170	DCMCODE_13	DCMCODE_13TRUE	1	0.407405	33	0.833765	0.242424	0.641541	0.87675	1.05828	0.828469
Tongue dorsum	X6_91527	OCPTN_ST	OCPTN_STTRUE	1	0.408236	32	1	0.53125	0.999666	-0.658905	0.796739	-0.827003
Nares	X6_161782	BMI_CAT	BMI_CATobese	1	0.408886	92	0.999944	0.445652	1.44118	-0.559056	0.676941	-0.825855
Tongue dorsum	X7_81985	BMI_CAT	BMI_CAToverweight	1	0.409117	128	0.931035	0.335938	1.37968	0.333565	0.404101	0.825449
NA	X6_27580	MURICA	MURICATRUE	1	0.409918	111	1	0.459459	0.500955	-0.515777	0.625914	-0.824039
Tongue dorsum	X6_60151	OCPTN_ST	OCPTN_STTRUE	1	0.409963	32	0.470567	0.09375	0.999666	-1.09861	1.33333	-0.823959
NA	X6_90688	MURICA	MURICATRUE	1	0.410226	111	0.900289	0.693694	0.500955	0.517542	0.628468	0.823496
Posterior fornix	X6_47906	DSUBFED	DSUBFED	1	0.410308	59	0.297758	0.0508475	1.06219	-1.01012	1.22684	-0.823352
Supragingival plaque	X6_197923	BMI_CAT	BMI_CATobese	1	0.411135	120	0.846737	0.266667	1.41039	0.54597	0.66428	0.821898
Tongue dorsum	X6_125450	BMI_CAT	BMI_CAToverweight	1	0.411174	128	0.651438	0.835938	1.37968	-0.429967	0.523183	-0.821829
Buccal mucosa	X6_17925	BMI_CAT	BMI_CATobese	1	0.41127	116	0.962422	0.37069	1.3928	0.530986	0.646234	0.821661
Buccal mucosa	X6_81136	BMI_CAT	BMI_CAToverweight	1	0.411595	116	0.366896	0.931034	1.3928	-0.653967	0.796462	-0.82109
Supragingival plaque	X6_159659	DSUDIET	DSUDIET	1	0.412176	117	1	0.504274	0.258144	0.394335	0.480855	0.82007
Supragingival plaque	X6_177609	BMI_CAT	BMI_CAToverweight	1	0.412526	120	0.793324	0.766667	1.41039	-0.380624	0.464484	-0.819457
NA	X6_90240	OCPTN_ST	OCPTN_STTRUE	1	0.412639	46	0.937734	0.673913	1	-0.537308	0.655846	-0.819259
Tongue dorsum	X6_27154	DSUBFED	DSUBFED	1	0.413278	124	0.999868	0.451613	1.27848	-0.261845	0.320049	-0.818139
Supragingival plaque	X6_142117	MURICA	MURICATRUE	1	0.413565	120	0.971161	0.383333	0.501139	-0.497044	0.607903	-0.817637
Tongue dorsum	X6_72946	OCPTN_ST	OCPTN_STTRUE	1	0.413682	32	0.987957	0.625	0.999666	-0.650735	0.796073	-0.817431
Supragingival plaque	X6_54148	MURICA	MURICATRUE	1	0.414288	120	0.976578	0.608333	0.501139	-0.52558	0.6438	-0.816371
Buccal mucosa	X6_58645	MURICA	MURICATRUE	1	0.414486	116	0.974547	0.387931	0.53827	0.512614	0.628184	0.816025
NA	X6_213360	DSUBFED	DSUBFED	1	0.414989	108	0.481546	0.101852	1.18299	0.505097	0.61964	0.815146
NA	X7_214048	OCPTN_ST	OCPTN_STTRUE	1	0.415228	46	0.818534	0.76087	1	-0.587787	0.721451	-0.814728
Supragingival plaque	X6_61652	MURICA	MURICATRUE	1	0.415473	120	0.920481	0.325	0.501139	-0.525499	0.645338	-0.814301
NA	X6_138599	OCPTN_ST	OCPTN_STTRUE	1	0.415593	46	0.512449	0.108696	1	0.818178	1.00502	0.81409
Tongue dorsum	X6_63853	MURICA	MURICATRUE	1	0.416072	128	0.98004	0.601562	0.52739	0.465045	0.571831	0.813255
Supragingival plaque	X6_61652	DSUDIET	DSUDIET	1	0.416104	117	0.929364	0.333333	0.258144	0.401363	0.493561	0.8132
Buccal mucosa	X6_26759	DSUBFED	DSUBFED	1	0.416343	113	0.521857	0.115044	1.30913	-0.412824	0.507914	-0.812782
Buccal mucosa	X6_76803	DSUBFED	DSUBFED	1	0.416355	113	0.406404	0.079646	1.30913	0.459061	0.564817	0.812761
NA	X6_31735	OCPTN_ST	OCPTN_STTRUE	1	0.416558	46	1	0.456522	1	0.508763	0.626241	0.812407
Buccal mucosa	X6_145806	BMI_CAT	BMI_CAToverweight	1	0.416644	116	0.974547	0.612069	1.3928	-0.333191	0.410203	-0.812258
Supragingival plaque	X6_105225	DSUBFED	DSUBFED	1	0.416871	117	0.583069	0.136752	1.28041	-0.41165	0.507044	-0.811861
NA	X6_213360	DCMCODE_13	DCMCODE_13TRUE	1	0.416917	46	0.635305	0.152174	0.688113	0.773873	0.953302	0.811782
Buccal mucosa	X6_104120	MURICA	MURICATRUE	1	0.417105	116	0.709685	0.810345	0.53827	0.531222	0.654655	0.811454
Retroauricular crease	X6_107346	OCPTN_ST	OCPTN_STTRUE	1	0.417148	13	0.970951	0.307692	1	1.09861	1.35401	0.811379
Retroauricular crease	X7_53884	OCPTN_ST	OCPTN_STTRUE	1	0.417148	13	0.970951	0.307692	1	1.09861	1.35401	0.811379
Retroauricular crease	X6_49238	OCPTN_ST	OCPTN_STTRUE	1	0.417148	13	0.970951	0.692308	1	-1.09861	1.35401	-0.811379
Retroauricular crease	X6_62357	OCPTN_ST	OCPTN_STTRUE	1	0.417148	13	1	0.615385	1	-1.09861	1.35401	-0.811379
Supragingival plaque	X6_56668	DSUDIET	DSUDIET	1	0.417399	117	0.891019	0.299145	0.258144	0.391894	0.483258	0.810943
Buccal mucosa	X6_129689	DSUBFED	DSUBFED	1	0.418114	113	0.373951	0.0707965	1.30913	-0.570254	0.70428	-0.809697
Nares	X6_110798	OCPTN_ST	OCPTN_STTRUE	1	0.418685	19	1	0.473684	1	-0.819143	1.01291	-0.808705
Retroauricular crease	X6_49238	BMI_CAT	BMI_CAToverweight	1	0.419547	26	1	0.461538	1.35031	-1.1126	1.37833	-0.807207
Buccal mucosa	X6_118862	BMI_CAT	BMI_CAToverweight	1	0.419985	116	0.955627	0.637931	1.3928	0.338424	0.419648	0.806447
Buccal mucosa	X6_84465	BMI_CAT	BMI_CATobese	1	0.420257	116	0.992704	0.577586	1.3928	0.541772	0.672194	0.805976
Supragingival plaque	X6_67816	DSUDIET	DSUDIET	1	0.421024	117	1	0.478632	0.258144	0.382896	0.475857	0.804646
Tongue dorsum	X6_70847	BMI_CAT	BMI_CAToverweight	1	0.421034	128	0.92311	0.328125	1.37968	0.32762	0.407169	0.804628
Tongue dorsum	X6_173387	OCPTN_ST	OCPTN_STTRUE	1	0.421551	32	0.654542	0.84375	0.999666	0.99483	1.23776	0.803734
Tongue dorsum	X6_117494	OCPTN_ST	OCPTN_STTRUE	1	0.421551	32	0.654542	0.84375	0.999666	0.99483	1.23776	0.803734
Tongue dorsum	X6_26486	OCPTN_ST	OCPTN_STTRUE	1	0.421551	32	0.654542	0.84375	0.999666	0.99483	1.23776	0.803734
NA	X7_214048	BMI_CAT	BMI_CAToverweight	1	0.421893	111	0.974651	0.612613	1.43492	0.353629	0.440308	0.803141
Tongue dorsum	X6_135880	DSUBFED	DSUBFED	1	0.422144	124	0.625306	0.153226	1.27848	0.354466	0.441588	0.802706
Supragingival plaque	X6_205297	MURICA	MURICATRUE	1	0.422456	120	0.965286	0.625	0.501139	-0.527277	0.657315	-0.802167
NA	X6_91527	BMI_CAT	BMI_CATobese	1	0.42272	111	0.669225	0.171171	1.43492	0.613743	0.765541	0.801711
Buccal mucosa	X6_209274	BMI_CAT	BMI_CATobese	1	0.422768	116	0.709685	0.189655	1.3928	-0.884573	1.10347	-0.801628
Buccal mucosa	X6_196633	DSUBFED	DSUBFED	1	0.422793	113	0.803512	0.761062	1.30913	-0.30816	0.384438	-0.801585
Buccal mucosa	X6_72839	DSUBFED	DSUBFED	1	0.422793	113	0.803512	0.238938	1.30913	0.30816	0.384438	0.801585
Supragingival plaque	X6_213360	MURICA	MURICATRUE	1	0.42281	120	1	0.541667	0.501139	-0.498477	0.621887	-0.801556
Buccal mucosa	X6_109238	BMI_CAT	BMI_CATobese	1	0.423095	116	0.894283	0.698276	1.3928	-0.527993	0.659116	-0.801063
NA	X6_118862	BMI_CAT	BMI_CAToverweight	1	0.423614	111	0.968538	0.621622	1.43492	0.355125	0.443814	0.800167
Posterior fornix	X6_107271	BMI_CAT	BMI_CAToverweight	1	0.423664	59	0.297758	0.0508475	1.46579	1.03216	1.29007	0.80008
Posterior fornix	X6_53818	BMI_CAT	BMI_CAToverweight	1	0.423664	59	0.297758	0.0508475	1.46579	1.03216	1.29007	0.80008
NA	X6_59371	BMI_CAT	BMI_CAToverweight	1	0.42453	111	0.877715	0.288288	1.43492	0.371283	0.464925	0.798587
Supragingival plaque	X6_72946	DSUDIET	DSUDIET	1	0.424737	117	0.396409	0.923077	0.258144	-0.477698	0.598447	-0.79823
Tongue dorsum	X6_146554	BMI_CAT	BMI_CATobese	1	0.424747	128	0.945676	0.648438	1.37968	-0.508513	0.637065	-0.798212
Supragingival plaque	X6_49238	BMI_CAT	BMI_CATobese	1	0.424828	120	0.695803	0.183333	1.41039	-0.664066	0.832086	-0.798073
NA	X6_133942	BMI_CAT	BMI_CAToverweight	1	0.425135	111	0.709098	0.189189	1.43492	0.418926	0.52527	0.797545
Supragingival plaque	X6_173132	BMI_CAT	BMI_CATobese	1	0.425497	120	0.807497	0.241667	1.41039	-0.58463	0.733612	-0.79692
NA	X6_146554	DCMCODE_13	DCMCODE_13TRUE	1	0.425514	46	0.818534	0.76087	0.688113	0.904036	1.13445	0.796892
NA	X6_183641	MURICA	MURICATRUE	1	0.425672	111	0.825497	0.252252	0.500955	-0.532898	0.668949	-0.796619
Tongue dorsum	X6_196633	DSUBFED	DSUBFED	1	0.425715	124	0.779733	0.774194	1.27848	-0.292107	0.366717	-0.796546
Supragingival plaque	X6_142117	DSUBFED	DSUBFED	1	0.425918	117	0.972279	0.384615	1.28041	0.27368	0.343734	0.796197
Tongue dorsum	X6_39457	BMI_CAT	BMI_CAToverweight	1	0.426224	128	0.877262	0.710938	1.37968	0.353385	0.444136	0.795669
Tongue dorsum	X6_159659	MURICA	MURICATRUE	1	0.42698	128	0.720675	0.804688	0.52739	-0.638467	0.803741	-0.794369
Tongue dorsum	X6_105476	DSUBFED	DSUBFED	1	0.427652	124	0.464339	0.0967742	1.27848	-0.471606	0.594548	-0.793217
Buccal mucosa	X6_107496	OCPTN_ST	OCPTN_STTRUE	1	0.427697	22	0.730017	0.818182	1	-1.05891	1.33509	-0.793139
Buccal mucosa	X6_97267	OCPTN_ST	OCPTN_STTRUE	1	0.427697	22	0.730017	0.818182	1	-1.05891	1.33509	-0.793139
Supragingival plaque	X6_109255	DSUDIET	DSUDIET	1	0.427941	117	0.901356	0.307692	0.258144	0.383947	0.484342	0.79272
Tongue dorsum	X6_29169	OCPTN_ST	OCPTN_STTRUE	1	0.428186	32	0.792288	0.78125	0.999666	0.779768	0.984184	0.792299
Tongue dorsum	X6_58645	OCPTN_ST	OCPTN_STTRUE	1	0.428186	32	0.792288	0.78125	0.999666	0.779768	0.984184	0.792299
Supragingival plaque	X6_39457	DSUBFED	DSUBFED	1	0.428292	117	0.891019	0.700855	1.28041	0.278671	0.351805	0.792118
Tongue dorsum	X6_195894	BMI_CAT	BMI_CATobese	1	0.428595	128	0.887278	0.296875	1.37968	-0.562505	0.710593	-0.791599
Tongue dorsum	X6_54148	DCMCODE_13	DCMCODE_13TRUE	1	0.429123	33	0.979869	0.363636	0.641541	-0.937131	1.1852	-0.790693
NA	X6_138599	BMI_CAT	BMI_CATobese	1	0.429269	111	0.411615	0.0810811	1.43492	0.727926	0.920909	0.790443
Buccal mucosa	X6_184627	MURICA	MURICATRUE	1	0.429278	116	1	0.465517	0.53827	0.470767	0.595585	0.790429
NA	X6_67816	BMI_CAT	BMI_CATobese	1	0.429478	111	0.603031	0.144144	1.43492	0.601448	0.761245	0.790085
Tongue dorsum	X6_119084	BMI_CAT	BMI_CATobese	1	0.429992	128	0.896865	0.304688	1.37968	-0.56875	0.720662	-0.789205
Tongue dorsum	X6_103412	BMI_CAT	BMI_CATobese	1	0.430325	128	0.99992	0.546875	1.37968	-0.503514	0.638462	-0.788635
Tongue dorsum	X6_29169	BMI_CAT	BMI_CAToverweight	1	0.430681	128	0.807761	0.757812	1.37968	0.35632	0.452168	0.788027
Tongue dorsum	X6_158772	DCMCODE_13	DCMCODE_13TRUE	1	0.430955	33	0.881291	0.727273	0.641541	-0.841403	1.06837	-0.787559
NA	X6_76152	BMI_CAT	BMI_CATobese	1	0.431152	111	0.500955	0.891892	1.43492	-0.735668	0.934512	-0.787222
Supragingival plaque	X6_123660	MURICA	MURICATRUE	1	0.431778	120	0.573618	0.866667	0.501139	-0.858311	1.09179	-0.786152
Tongue dorsum	X6_49238	MURICA	MURICATRUE	1	0.431931	128	0.780805	0.226562	0.52739	-0.520638	0.662481	-0.785891
Buccal mucosa	X6_144884	MURICA	MURICATRUE	1	0.431937	116	0.847928	0.732759	0.53827	0.476316	0.606092	0.785881
Supragingival plaque	X6_116723	DSUDIET	DSUDIET	1	0.432117	117	0.77378	0.777778	0.258144	-0.374806	0.47711	-0.785574
Posterior fornix	X6_25913	DSUBFED	DSUBFED	1	0.433741	59	0.538976	0.118644	1.06219	0.796482	1.01747	0.782806
NA	X6_111812	OCPTN_ST	OCPTN_STTRUE	1	0.433793	46	0.359673	0.934783	1	-1.02165	1.30526	-0.782717
NA	X6_137666	OCPTN_ST	OCPTN_STTRUE	1	0.433793	46	0.359673	0.934783	1	-1.02165	1.30526	-0.782717
NA	X6_81136	OCPTN_ST	OCPTN_STTRUE	1	0.433793	46	0.359673	0.0652174	1	1.02165	1.30526	0.782717
[truncated: 3,419 more rows]
